# Supplementary material
Source: publisher figshare collection journal article supplement (https://springernature.figshare.com/ndownloader/files/17422772)
Supplement: Supplementary file 1 [file 17422772]

## Sheet: Model Inputs
						Ensenada	Thickness isopach
		Min	Max				1 - 5 mm		5 - 10 mm		10 - 20 mm		20 - 30 mm		30 - 60 mm		60 - 100 mm		100 - 150 mm		150 - 200 mm		200 - 300 mm		300 - 550 mm
	VLA						Min	Max	Min	Max	Min	Max	Min	Max	Min	Max	Min	Max	Min	Max	Min	Max	Min	Max	Min	Max
	Area (m2)	4009000	4431000			Thickness (mm)	1	5	5	10	10	20	20	30	30	60	60	100	100	150	150	200	200	300	300	550
	Impervious only (m2)	391426	432628			Area of exposed assets (m2)	19459.8	21508.2	25563.5	28254.5	13434	14848	13090	14468	56782.4	62759.6	93858.1	103738	138938	153562	4.90556e+06	5.42194e+06	833625	921375	14272.8	15775.2
	Roads only (m2)	1.11578e+06	1.23323e+06			Impervious (m2)	0	0	0	0	0	0	0	0	0	0	0	0	2629.6	2906.4	96761.3	106947	2794.9	3089.1	0	0
	Roads and impervious (m2)	1.50721e+06	1.66586e+06			Roads only (m2)	19459.8	21508.2	25563.5	28254.5	13434	14848	13090	14468	56782.4	62759.6	93858.1	103738	66566.5	73573.5	138926	153550	26548.7	29343.3	14272.8	15775.2
	Tephra thickness (mm)	2	3			Roads and impervious (m2)	19459.8	21508.2	25563.5	28254.5	13434	14848	13090	14468	56782.4	62759.6	93858.1	103738	69196.1	76479.9	235687	260497	29343.6	32432.4	14272.8	15775.2
	Truck size (m3)	3.75	5
	Number of trucks	5	5			Ensenada duration parameters	Min	Max
	Time to disposal site (proportion of 1 hr)	0.2	0.3			Truck size (m3)	7	10
	Hours of operation (hrs)	8	8			Number of trucks	60	60
	SMA					Time to disposal site (proportion of 1hr)	0.375	0.5
	Area (m2)	7153500	7906500			Hours of operation (hrs)	8	8
	Impervious only (m2)	1.26408e+06	1.39714e+06			Reported volume	150000	450000
	Roads only (m2)	1.39411e+06	1.54086e+06
	Roads and impervious (m2)	2.65819e+06	2.938e+06
	Tephra thickness (mm)	5	20
	Truck size (m3)	3.75	5
	Number of trucks	7	7
	Time to disposal site (proportion of 1 hr)	0.2	0.3
	Hours of operation (hrs)	8	8
	JDA
	Area (m2)	4664500	5155500
	Impervious only (m2)	625457	691295
	Roads only (m2)	894688	988866
	Roads and impervious (m2)	1.52015e+06	1.68016e+06
	Tephra thickness (mm)	9	40
	Reported volume	20000	60000
	Truck size (m3)	3.75	5
	Number of trucks	10	50
	Time to disposal site (proportion of 1 hr)	0.2	0.3
	Hours of operation (hrs)	8	8

## Sheet: Volume - Monte Carlo
SMA	Volume			JDA	Volume			VLA	Volume			Ensenada	Volume (1-5mm)					Volume (5-10mm)					Volume (10-20mm)					Volume (20-30mm)					Volume (30-60mm)					Volume (60-100mm)					Volume (100-150mm)					Volume (150-200mm)
Thickness	Roads+Impervious	Just roads	Total deposit	Thickness	Roads+Impervious	Just roads	Total deposit	Thickness	Roads+Impervious	Just roads	Total deposit	Thickness	Roads and impervious	Just roads	Refined	Total	Thickness	Roads and impervious	Just roads	Refined	Total	Thickness	Roads and impervious	Just roads	Refined	Total	Thickness	Roads and impervious	Just roads	Refined	Total	Thickness	Roads and impervious	Just roads	Refined	Total	Thickness	Roads and impervious	Just roads	Refined	Total	Thickness	Roads and impervious	Just roads	Refined	Total	Thickness	Roads and impervious	Just roads
13.3193	36528.6	19325	102944	32.7447	54069.2	31524.4	167579	2.53272	4025.84	2961.9	11161.5	3.59478	71.3162	75.5873	75.535	75.0769	5.84197	163.019	159.348	164.743	153.033	14.6974	203.74	204.815	199.533	216.36	23.453	311.837	309.667	315.898	323.137	42.34	2632.39	2519.29	2520.45	2519.59	69.8949	7221.74	7203.08	6628.94	7080.17	137.636	9707.92	9523.71	19190.4	21029.4	162.239	39672.7	24749.1
8.11351	22262.1	11962.6	58922.9	18.105	27535.4	17224.9	86097.7	2.68786	4345.21	3258.23	11233.7	4.90868	105.496	96.7684	102.521	100.12	7.66775	202.72	206.567	211.009	212.372	10.3593	150.159	146.321	141.84	142.98	24.097	336.641	320.38	325.981	317.622	42.1321	2451.63	2635.61	2447.26	2504.9	79.15	7758.67	8002.13	7517.73	7433.37	102.037	7562.86	7208.16	15642.2	14470.1	198.923	51373.5	29065.7
7.74785	22760.5	11272	59923.7	17.6453	27324.7	16912.2	88842.7	2.48339	4053.27	2992.62	10148.8	3.32969	69.6701	67.0759	64.8161	66.8976	6.25832	172.383	173.431	165.184	172.178	12.7551	180.154	176.947	174.186	180.918	27.677	377.652	389.362	378.334	372.804	49.5895	3066.2	3099.81	2850.11	3011.22	81.6331	7907.08	7845.73	7821.9	7665.24	120.825	8409.07	8464.31	17969.5	18350.3	177.513	46124.6	25671.9
12.9782	35851.7	19653.6	96124.5	19.064	31018	17540.3	92135.1	2.95164	4568.67	3481.87	12181.2	4.32828	91.3071	91.6558	89.3983	88.3039	9.17066	246.349	255.403	243.356	239.484	18.144	257.442	250.971	253.731	256.817	25.8307	353.044	350.039	342.216	342.287	50.635	3042.69	3163.34	3119.2	3112.33	79.9911	8185.02	7812.16	7987.1	7724.65	124.577	9069.84	8352.86	18448.5	18900.8	197.124	49614.2	29144
14.8683	42848.7	22595.4	106804	28.1892	46198.7	27873.1	135233	2.06911	3309.96	2453.89	8564.88	1.56576	30.5869	30.4901	30.8683	33.4034	6.70674	184.345	184.163	175.842	186.439	18.3826	262.271	251.217	265.077	264.27	21.8293	289.818	288.501	286.22	289.046	48.1189	2745.21	2827.23	2769.81	2956.8	68.6961	6893.8	6726	7027.61	7117.47	134.208	9640.66	9571	20100.8	19781.7	172.8	43266.4	25679.5
17.0131	46088.6	25265.1	129362	14.2336	21836.4	13953.3	71552	2.42271	3836.25	2936.88	10196.1	4.77205	101.029	92.9033	102.426	93.8513	5.19173	137.904	136.416	143.13	139.521	11.4985	169.194	163.913	156.554	167.219	27.7227	396.265	387.795	367.432	388.976	56.6535	3356.04	3452.38	3514.45	3293.65	60.3708	5778.86	5701.53	6062.57	5876.26	102.463	7835.79	7041.63	15414.6	15134.2	168.928	42379.8	24923.5
17.8682	50244.5	26644.5	129324	30.2783	48622.5	28179	154500	2.58744	4036.84	3097.59	10850.5	1.61259	34.1844	31.6536	32.2367	34.3517	9.02829	249.861	244.783	239.252	241.186	12.0364	171.2	171.143	172.959	165.258	27.145	376.738	369.129	381.56	359.326	54.4845	3263.27	3146.93	3116.2	3297.57	72.0372	6818.58	6969.2	7374.49	7393.05	121.538	9131.97	8215.19	17104.3	17207.4	192.522	48276.8	26951.9
18.3239	49853.9	28031.2	131404	35.5705	59120	34783.5	173625	2.57622	4212.7	3164.74	11091.1	3.80564	78.3318	80.4724	80.2987	79.4935	5.58731	148.804	149.659	153.259	143.32	11.8195	162.408	167.27	162.766	158.83	21.824	298.627	287.646	301.637	310.519	47.2413	2944.3	2953.47	2842.54	2700.61	79.9265	8133.86	7650.68	8078.54	7575.31	122.998	8545.23	8286.43	17691.3	18869	167.284	43258.6	23483
19.3312	52415	27657	149587	27.4626	42864.7	25747.5	133030	2.41356	3961.02	2802.89	10679.6	2.22699	45.6297	44.339	43.4162	45.2716	9.53675	244.701	264.315	263.855	244.409	18.5106	249.195	260.389	249.871	258.858	26.1583	344.676	344.05	345.156	363.595	59.1071	3678.58	3666.26	3481.28	3470.26	90.9874	9096.05	9375.9	9016.58	9067.88	127.111	8810.93	9220.02	19122.6	18891.1	165.639	40251.4	25398.9
8.14554	22703.4	12222.2	61600.9	14.0715	21694.2	12692.7	69793.2	2.91443	4847.62	3516.88	11826.4	2.91184	57.2666	58.6304	61.1491	59.3323	5.00088	134.392	130.647	135.367	139.892	13.7635	186.08	201.482	203.323	202.249	20.7898	276.098	275.061	289.283	292.278	32.8653	1917.61	1884.05	2040.66	1978.78	84.358	8348.03	7927.11	7935.84	8259.04	126.125	9546.92	8787.95	17854.8	19158	152.776	38889.4	22452.2
15.9954	42693.1	22533.9	116871	23.7804	39946.7	23480.9	112611	2.53978	4129.1	3023.68	10859	3.82271	77.0134	80.8922	80.7944	81.3031	8.49459	232.072	234.082	239.472	228.315	14.3247	212.68	197.712	211.943	207.979	27.1201	371.316	389.235	367.591	391.933	53.6539	3105.02	3295.79	3330.83	3278.67	92.0814	9124.04	9119.85	9336.1	9022.5	132.998	9355.31	9045.75	19955	19099.1	197.383	47146.5	29496.9
9.50503	25877	13491.2	70874.3	22.9435	36336.5	20989.3	108142	2.93363	4702.87	3328.31	11837	3.23725	63.2538	68.5956	65.6081	66.2757	9.87465	262.6	275.888	267.684	267.209	10.5791	154.366	149.239	142.409	147.348	20.8177	278.1	276.162	274.956	294.215	34.3945	1963.36	2064.31	2075.29	2136.36	64.2914	6385.27	6583.65	6547.13	6261.38	119.048	8832.5	8755.44	17887.6	17410.8	176.308	44845	26152.6
18.0223	51524.7	27218.8	134541	33.1888	51454.5	30252.9	158761	2.37286	3887.32	2852.84	9995.05	4.03372	79.3855	84.8429	79.1573	82.2778	8.0329	209.364	214.929	221.303	205.636	18.9959	280.829	267.798	274.106	260.687	27.9139	370.697	396.423	381.874	386.083	38.2345	2339.83	2344.15	2393.86	2376.27	82.8968	7801.41	8135.48	8036.92	8527.14	102.419	7130.35	7428.48	15103.8	15717.1	150.415	35743	22046.9
14.7352	41606.6	20678	109418	11.7206	18671.1	11519	55604.8	2.67168	4240.3	3135.56	10768.7	2.21255	43.5484	47.1603	45.4827	43.2427	8.49491	238.326	221.088	231.283	232.179	15.2258	210	215.775	225.418	223.359	23.6874	319.009	332.381	332.669	322.8	47.803	2874.03	2901.91	2883.41	2931.77	70.7714	6951.27	7287.64	6999.4	7257.46	100.933	7282.07	7373.76	14245.8	14940.2	159.639	39764.8	23930.6
15.0518	43570	21272.1	112151	36.9947	57804.5	35098.3	188664	2.39351	3740.13	2906.6	10146.6	4.99767	98.2217	100.087	106.642	106.438	7.19567	202.782	201.227	202.187	187.669	12.0308	167.891	164.952	167.52	168.446	23.6047	340.974	328.607	319.684	316.951	48.3819	2961.61	2890.17	2885.11	2762.96	78.6303	8119.59	7740.78	7969.82	7661.71	116.429	8776.41	8289.4	16817.9	16236.9	168.316	42287.1	24030.9
9.91995	27648.6	14933.2	74339.1	20.7386	32482.3	18605.7	101293	2.2757	3715.83	2541.31	9403.75	1.91647	38.8949	38.6888	38.8597	38.4743	8.14177	229.6	218.249	228.709	219.323	16.7324	235.229	231.846	225.304	238.984	25.2921	344.844	363.087	344.659	339.73	46.0025	2812.54	2884.15	2861.43	2627.44	64.5812	6084.44	6104.99	6234.46	6304.46	139.966	10128.6	10073.2	20082.4	21102.5	163.953	42012.5	24271.3
17.7339	48954.5	24759.3	133327	17.4356	28663.3	15849.9	88113.7	2.21701	3630.86	2683.79	9292.83	1.13963	24.1089	23.6736	22.3616	23.3239	8.21864	218.039	214.648	229.261	215.019	13.5931	189.688	196.704	194.006	196.609	29.7178	400.823	397.653	401.229	398.029	44.4356	2714.72	2679.09	2547.12	2550.41	84.0368	8484.27	8398.11	8458.55	8122.14	129.978	9511.2	9188.01	18646.6	18789.8	163.04	40979.7	24217.6
13.7609	37662.7	21100.5	100821	34.4252	54299.4	32770.1	161807	2.01009	3124.73	2361.89	8816.31	1.83523	39.0129	35.7261	36.0309	38.8036	7.34773	199.417	188.804	201.698	202.718	10.1851	144.299	149.79	140.415	145.291	26.9218	388.771	378.987	381.951	360.875	57.0484	3445.84	3516.14	3270.89	3303.28	96.7735	9686.68	9983.62	9682.42	9291.93	141.923	10461.2	9849.14	20886	21077	176.189	45847.7	26380.4
16.9916	46448.3	25243.3	128407	10.0071	15439.5	9769.3	48073.2	2.27577	3455.87	2706.74	9460.15	3.12618	63.0396	61.2252	61.0874	66.601	5.38937	140.081	140.706	141.485	141.902	17.647	239.527	250.852	259.947	259.964	26.4716	353.768	376.4	348.129	357.599	42.3322	2595.38	2432.13	2542.51	2407.19	70.2494	6809.96	6976.47	6728.55	6978.76	148.326	10390.2	10209.3	22652.1	22719.2	158.644	41184.4	22917.8
15.1778	42447.9	21180.4	116365	16.6574	26061.1	15419	85313.3	2.37398	3606.49	2735.46	10376.4	1.32375	27.9013	25.829	27.8224	26.6995	5.23669	137.574	136.298	144.864	147.69	12.3125	169.46	181.499	174.195	171.975	21.2616	280.609	281.973	298.697	283.254	57.5134	3499.25	3541.35	3593.07	3272.43	84.2612	8659.62	8459.78	8163.01	8669.67	110.394	8297.91	8012.02	16736.9	15499.6	197.809	51335.5	27666.7
13.6411	36816.4	19201	106888	12.6304	20437.5	12413.6	64221.8	2.8844	4613.41	3305.51	11606.2	3.47112	67.722	70.1135	74.5093	73.7283	5.57518	151.86	154.367	144.58	156.607	17.7015	257.697	249.493	262.503	255.013	21.3326	281.737	296.918	290.199	288.864	38.1143	2300.27	2265.83	2223.68	2367.88	75.987	7758.67	7553.53	7592.46	7132.15	126.482	8933.52	8941.72	18185.1	18355.1	152.954	36441.5	23120.2
14.8877	43164.6	21040.6	116099	22.8457	37061.1	21654.7	108798	2.32713	3590.45	2717.6	9471.22	3.37395	67.5328	65.6722	68.9761	67.1816	6.5994	170.378	185.027	172.961	174.626	15.6106	210.687	212.279	210.071	210.294	20.4648	274.784	274.938	292.688	283.08	49.9423	3047.85	2965.74	2934.94	2935.67	85.0741	8791.47	8118.22	8147.46	8425.21	106.991	8157.66	7776.65	15881	15385	170.371	40878.9	24981.2
11.3251	31298.7	17061.7	81959.4	37.1971	59570.7	36524.9	176796	2.77986	4416.84	3103.79	11162.5	3.32842	67.6681	66.1683	66.1638	69.4275	8.29371	216.995	225.456	227.213	218.378	13.4459	190.636	189.857	190.983	193.103	23.33	331.894	323.547	333.27	306.672	59.27	3715.53	3474.72	3543.09	3575.46	63.9267	6224.36	6398.48	6433.46	6307.37	115.471	8256.71	7727.79	17401.8	16873.9	174.666	44074.4	25100
11.2044	32437.9	16979	83484.2	19.0593	31341.1	17118.7	97240.2	2.79839	4620.12	3319.32	11269.8	1.462	30.3802	30.5132	29.2966	31.3465	5.34563	140.934	144.009	137.685	145.252	17.3879	236.172	247.506	240.723	237.94	22.2817	306.061	309.575	304.878	296.79	39.4349	2306.89	2302.53	2308.84	2323.82	81.7105	8307.32	8414.25	7798.13	8261.44	102.6	7444	7128.5	14681.8	14621.9	189.217	47747.3	27984.9
18.7746	51491.3	27383.8	147453	38.8255	63883.3	35034.4	187851	2.91554	4514.53	3302.95	12184.1	1.80936	38.4065	35.4129	36.093	38.4075	8.5943	230.571	227.292	222.902	219.942	19.2939	282.171	280.828	264.662	278.805	21.5297	307.362	306.698	293.161	284.822	42.3223	2487.26	2630.68	2529.86	2593.18	86.4804	8634.72	8902.68	8912.83	8911.11	109.231	8186.44	7762.89	15799.2	15186.7	156.815	39266.6	23969.3
7.97407	21495.6	12148.4	62178.4	33.2971	51948.5	31136.9	167053	2.05537	3149.89	2327.48	8735.48	2.68092	56.3412	55.4537	57.5627	55.0425	7.77365	212.781	216.594	201.524	209.724	18.4125	250.614	261.772	270.531	268.85	29.9853	410.962	423.868	426.461	395.201	36.7848	2300.9	2162.3	2262.7	2214.89	79.8442	8050.01	8277.97	7766.54	7516.12	105.087	7738.68	7609.69	15227	15947.9	191.175	48558.2	28836.9
6.67348	18272.4	9943.26	48861.3	36.0215	59312.1	34216.4	169446	2.81411	4635.42	3426.4	12009.2	3.32823	67.7145	65.7235	67.7966	69.8619	8.025	226.625	209.345	207.487	217.564	16.0807	233.602	232.548	228.525	231.833	23.9507	342.76	332.085	321.56	321.534	40.435	2371.23	2473.55	2490.33	2402.23	70.3336	7091.64	6883.69	7257.24	6778.01	138.459	10513.4	9913.92	19396	20770.4	177.527	44629	26860.7
10.6602	30436.8	14968.1	77166.9	32.2706	52664.9	30248.2	150734	2.8734	4699.77	3309.85	12653.5	4.65551	95.8687	91.3498	99.4054	96.6883	7.76335	214.745	213.68	210.631	209.021	17.3821	251.412	236.185	235.079	239.447	29.6755	400.417	424.765	421.134	404.797	30.9356	1790.08	1760.24	1898.28	1850.1	82.9693	8584.51	8516.02	8350.2	8375.31	113.701	8037.61	7603.04	17179.1	16252.7	165.023	41307.7	24263.4
13.7842	38823.9	20718.1	104298	11.4106	18202	10646.3	53660	2.30653	3791.85	2626.47	9289.29	4.43401	88.8163	93.4875	87.7289	86.725	5.63135	152.798	151.151	155.075	145.858	14.9928	217.618	206.426	219.647	216.814	20.8649	277.612	293.303	274.801	280.649	33.8236	1972.06	1964.01	2067	2062.6	61.5567	5996.57	6362.84	6181.52	5987.52	113.253	8201.74	8241.97	16310.6	15929.1	152.677	39563.8	21220.1
5.61099	15073.9	8064.31	41881.8	29.0744	45161.6	27559	144370	2.30871	3501.38	2597.75	9384.46	1.27962	26.5646	26.3027	26.8101	25.4056	8.56295	225.553	228.26	236.852	236.207	15.3677	215.406	217.974	209.821	212.819	23.8499	337.105	339.149	336.611	322.665	50.3616	2925.78	3154.97	3085.94	3047.47	96.2266	9096.86	9458.11	9559.5	9190.28	106.051	8065.83	7130.9	15465.1	15033.6	178.249	42553.4	26991.4
7.84465	21454.5	11677.3	61026.8	30.7901	47070.7	29291.8	148041	2.87162	4736.53	3224.29	12554.1	1.45663	29.6499	29.6766	29.712	29.4044	6.57136	171.908	174.913	183.961	183.883	15.6134	223.479	223.301	219.559	215.882	22.626	322.939	300.49	313.188	308.525	45.013	2558.87	2680.82	2664.77	2623.97	89.0465	9150.92	8699.73	8889.39	8725.47	124.75	9501.21	8741.02	17452	18935.8	154.517	37313.1	23659.4
14.3636	38877.6	21338.9	104872	37.5681	57956.2	36295.7	188027	2.50075	4055.67	3079	10985	2.49268	52.6886	50.2612	51.6815	50.3872	5.29324	143.115	140.354	142.148	136.313	12.4635	182.709	182.966	175.662	170.846	26.9146	352.411	361.863	386.776	363.814	36.1013	2259.69	2089.16	2075.86	2265.57	85.4086	8092.81	8723.04	8147.28	8728.05	146.508	10829.9	10482.4	20459.8	21210.4	184.314	45629.6	26338.3
17.431	49204	24533	126347	11.6196	18923.4	10549	58588.7	2.77796	4506.06	3113.37	11271	1.42417	28.0258	29.2581	28.5144	30.5658	9.21417	259.605	244.603	242.97	241.715	19.3986	269.66	282.516	278.249	267.823	28.8172	407.205	383.495	414.199	406.303	39.5616	2379.71	2480.17	2336.76	2370.93	81.6201	7952.33	8294.3	7782.74	8020.48	141.908	10177	10302.6	21639.3	21735.1	192.327	48324.6	27163.2
13.7056	36554.8	20990.6	102073	17.6651	28977.2	16151	83520.8	2.79808	4541.88	3336.76	11797.1	2.76114	57.1451	57.3935	57.9293	55.368	9.11093	240.431	236.948	248.381	240.536	11.7181	161.781	166.694	173.862	173.333	23.5921	330.595	325.947	311.145	330.921	44.2674	2589.65	2697.51	2776.76	2676.82	63.1933	6023.21	6059.73	6182.58	6431.09	129.211	9643.64	9026.12	18527.4	19008.9	152.874	36475.3	21772.4
9.45986	26300.5	14430	71426.9	31.0584	48799.1	28136	152980	2.97815	4934.24	3599.07	12678.2	2.99531	59.5951	58.618	61.4426	63.4925	7.74264	198.636	217.281	210.568	204.531	13.0294	191.275	193.2	186.805	178.009	23.6496	312.782	330.154	331.601	315.106	30.7243	1786.44	1886.39	1893.33	1775.92	96.8046	9496	9386.72	10005.3	9335.85	125.006	8945.47	9192.03	17788.9	17577.7	191.176	45136.6	26920.8
15.8045	44846.2	23776.6	124732	37.6894	59218.4	35902.7	180319	2.35242	3751.34	2893.01	10400	4.25366	84.9426	83.4416	83.2955	89.6614	8.84554	244.558	228.722	239.011	248.77	14.6812	210.437	217.695	209.011	205.283	29.2674	416.338	422.97	407.435	414.876	51.0986	3113.61	3174.1	2969.42	3163.24	73.5482	7112.93	7549	7240.32	7035.78	149.294	11163.9	10960.8	22219.8	21674.7	166.69	42461.7	23830.5
19.1179	50900.8	26984.5	148311	33.8703	52190.8	32957.7	171184	2.15515	3374.26	2499.87	9490.04	4.4895	89.9752	95.2923	90.8719	87.7283	7.91297	202.835	207.546	212.694	203.048	14.1071	193.603	195.432	208.767	205.843	20.7967	285.682	284.037	297.15	289.651	31.7059	1859.13	1867.06	1851.36	1969.97	93.167	9508.07	9556.4	8992.91	9401.62	136.309	10012.7	9782.83	19262.3	19410.4	189.827	45064.7	29106.7
14.2686	41610	20784.3	104495	28.2257	44051.8	25411.7	141855	2.21769	3415.19	2643.36	8983.74	1.78634	38.1098	38.4031	37.7414	36.5435	9.83818	271.051	259.425	270.647	262.097	19.016	282.217	261.808	276.075	274.821	26.3035	372.751	366.93	358.997	375.536	48.504	2876.79	2899.38	2973.61	2951.43	60.1505	5911.23	5903.06	5646.61	5852.61	138.354	10023.7	9850.28	19732.4	19525.4	193.426	49989.6	29079.4
9.93866	28781.5	15155.7	77565.9	37.3863	60138.7	35188.1	188741	2.62356	4320.4	2936.22	11257.8	1.31947	28.0694	26.4919	28.3002	28.233	6.90358	180.979	186.708	179.06	194.797	10.3202	152.342	139.748	150.824	142.401	22.247	300.744	304.983	296.097	321.012	53.2411	3100.51	3253.16	3300.02	3088.94	63.6892	5992.96	5983.9	6114.5	6387.53	108.617	7862.34	7521.93	15171.7	15268.7	173.767	42952.2	26659.2
12.4041	35648	17847.6	97952.5	27.2377	42014.1	25455.8	129948	2.3798	3776.6	2915.93	9875.75	4.21617	84.4643	85.5018	90.511	88.6637	5.74723	152.862	149.114	154.433	153.204	13.742	197.813	195.832	200.89	187.201	21.7322	307.635	300.432	312.296	296.518	48.9495	2976.48	2911.39	2959.95	2934.31	98.373	9913.89	9372.73	9592.29	10014.2	116.063	8121.05	8303.06	17532.7	17808.1	151.468	37812.5	21597.9
8.56164	24283.4	12604.7	66854.2	9.49652	14779.2	8785.28	45167.5	2.07241	3419.31	2464.71	8866.17	1.81348	37.4366	37.0473	36.8862	38.1317	6.50233	179.197	181.848	168.46	177.066	13.7923	197.1	186.823	186.684	192.784	26.7649	381.352	358.41	355.629	351.994	39.5117	2381.02	2444.18	2397.82	2274.62	61.9942	6366.03	5967.37	6115.3	6424.61	103.958	7744.32	7268.04	14494.6	15038.2	173.83	43970.7	25389.3
9.30142	26352.1	13817.8	70872.9	31.0163	51578.2	30319	159370	2.54586	3978.01	3137.5	11271.1	4.10807	85.3231	82.7523	84.486	88.0227	6.34419	176.249	165.14	172.374	169.498	12.8922	191.4	174.703	182.699	182.012	27.0173	372.482	380.193	380.765	363.175	47.3712	2804.45	2761.58	2782.01	2895.42	70.6675	6738.02	7321.41	7123.99	6670.35	132.646	9351.72	9367.05	19104.6	18942.8	164.231	39698.8	24201.5
12.738	35882.4	19567.2	91686.7	28.7934	44758.6	26735.4	144315	2.04654	3185.78	2347.94	8326.98	3.90779	81.7094	81.8213	79.4852	76.5141	9.83122	266.17	276.155	261.31	277.206	15.2263	213.086	222.726	213.924	216.969	27.5461	369.217	395.986	396.165	384.43	31.493	1910.01	1908.78	1794.38	1915.11	84.1071	8160.18	8177.26	7941.87	8472.57	108.087	7930.48	7481.13	15786.1	15814.4	178.868	43529.4	26071.8
15.256	43455.2	22771.1	116525	16.4943	26488.1	16085.7	83550.4	2.67962	4367.31	3077.39	11548.1	2.99212	61.5914	60.8067	61.5298	59.4428	6.76726	180.337	187.715	190.774	180.255	10.3857	153.384	144.844	152.521	147.912	29.3798	421.273	386.508	402.812	409.158	43.2719	2519.63	2542.71	2462.11	2601.15	64.5454	6328.13	6522.86	6471.83	6266.89	132.321	10105.5	9301.27	20032.8	19709.8	196.328	50102.9	27813.5
11.1925	30551.6	16806.6	82857	26.5884	40717.6	24370.7	130367	2.82509	4415.63	3467.49	11626.5	4.19481	85.0141	85.1231	84.2106	87.7392	6.38491	165.158	179.858	165.727	171.59	11.5523	169.458	166.037	171.383	156.773	21.9944	302.387	304.701	310.22	316.968	32.6246	1965.02	1882.07	1967.42	2041.78	74.0589	7509.73	7645.74	7497.72	7411.36	113.755	8629.33	8252.71	17144	17083.7	178.902	46104.4	26076
5.35039	14315.7	8177.41	40211	38.0459	58262	35828.2	181305	2.24033	3422.32	2732.63	9242.11	2.33871	48.5061	45.9082	48.2806	49.2533	6.5672	169.052	179.307	168.192	174.182	11.8321	166.375	165.674	164.47	169.042	27.2412	359.055	385.999	360.624	383.724	46.9288	2697.53	2870.8	2734.46	2743.71	82.4207	8455.25	8091.25	8083.72	8175.81	138.002	10039.6	9446.81	20799.1	20592.1	171.88	43825.4	23882.7
19.2622	51328.8	28802.2	140618	18.4767	30458.9	17646.9	94336.9	2.68168	4210.03	3192.41	11069.2	3.69982	75.8786	76.2784	78.9433	76.2497	8.17488	218.569	218.925	220.187	216.293	18.5294	265.328	258.77	250.848	265.552	24.8203	335.97	336.909	344.13	330.121	44.7738	2662.46	2795.81	2655.69	2778.16	93.923	9173.11	9243.33	9484.97	9361.26	115.235	8090.82	8316.36	17643.8	17529.8	192.971	49098.1	29446.1
5.20489	14668.6	7747.53	40060.5	17.8897	28980.7	17270.5	87413	2.93867	4610.74	3542.31	12666.4	3.361	66.3943	69.6749	71.6022	65.653	6.53582	182.825	182.767	167.656	179.98	14.3679	193.205	206.278	206.673	204.739	27.5626	369.448	373.303	365.178	371.25	44.9358	2727.9	2685.11	2655.46	2642.46	77.599	7951.76	8008.91	7537.88	7744.45	108.666	8284.7	7525.06	15964.4	15126.5	159.696	38007.9	24128.9
11.9054	34194.3	17553.8	91404.5	33.5124	53267.5	30792.8	164732	2.74424	4293.6	3247.19	11856.4	3.26963	68.1139	66.5265	64.9721	68.5943	7.009	180.315	185.539	195.819	183.047	13.8914	197.886	196.467	201.786	194.303	23.8912	326.737	320.688	341.267	330.782	47.5051	2859.58	2967.7	2882.31	2861.44	69.8088	7212.83	7238.76	6899.76	6583.39	141.937	10696.7	9491.44	21732.9	20000.6	167.681	42014.6	25527.5
12.7185	36420.7	17828.8	92918.7	9.73467	15087.6	9599.62	48188.6	2.29101	3612.26	2612.28	9551.98	4.75128	99.4287	97.768	92.6205	101.288	9.68958	267.376	261.75	272.251	255.773	11.8868	171.57	166.044	169.916	171.171	21.2848	301.658	281.249	278.808	291.761	58.1747	3533.18	3425.29	3363.71	3601.87	92.684	9328.96	8874.91	9144.76	9195.64	120.712	8575.67	8644.41	17008.4	18373.6	151.41	39021.1	21280.5
5.44756	15114.8	8067.24	42554	11.4969	19301.7	11023.4	57608.9	2.1133	3496.83	2379.78	8889.91	3.28355	68.4946	67.2179	64.6973	67.8494	8.79068	233.395	245.634	239.472	244.625	10.6095	150.671	149.742	146.428	157.093	26.5643	348.272	371.262	347.771	374.449	32.9944	1940.8	2039.4	2011.21	1915.02	71.1372	6725.09	6757.38	7097.42	7242.97	116.741	8249.57	7816.99	16684.7	17421.8	155.199	38471.2	23146
10.9021	30836.5	16192.4	83100.8	9.19207	14473	8895.35	44352.5	2.24668	3413.9	2754.14	9630.56	3.57077	71.1464	69.6215	72.0406	70.6244	8.88627	236.397	241.568	244.769	246.51	10.4385	147.998	142.997	147.239	142.285	26.9203	375.568	386.747	374.802	356.205	58.0966	3478.87	3512.44	3309.86	3341.96	69.8801	6777.63	7105.03	6900.18	6699.33	129.999	9720.47	8967.39	18614.3	18831	176.745	41778.9	25858
10.0851	27871	14320.9	76967.8	33.5148	56123.8	31553.4	157431	2.40841	3742.57	2866.8	10286.7	4.91439	96.6012	102.789	99.9365	98.3604	6.02923	160.287	162.513	169.443	163.046	17.1028	232.978	232.657	232.226	232.381	25.893	357.382	360.421	368.856	340.827	41.9734	2399.75	2520.87	2468.75	2589.42	84.2703	8668.93	8320.72	8055.37	8082.33	118.833	8998.59	7988.56	16565.9	17786.5	181.151	44940.8	26308.9
9.81674	26797.6	14726	72525.1	16.4134	26120	15318.4	81961.5	2.59798	4319.52	3068.86	11291.5	1.80843	37.7841	38.7073	37.6505	38.077	8.28401	226.209	222.444	232.015	229.7	17.3428	246.173	249.815	243.322	251.863	25.7507	359.324	361.487	338.86	368.739	58.9169	3652.49	3416.08	3590.97	3429.71	99.5206	9541.66	10256.2	9538.47	10062.8	122.86	8923.82	8531.87	17095	17218.8	187.029	45911.6	26737.3
16.5197	44837.2	24615.7	118228	29.727	46407.5	27577.3	145289	2.44972	3731.98	2853.82	10571.9	3.31313	66.5458	69.0517	69.7837	64.9966	6.5398	174.907	167.874	182.81	179.167	15.0284	222.756	209.669	209.11	208.682	23.8609	333.058	314.252	344.745	343.936	39.185	2343.07	2344.92	2227.43	2424.95	65.2142	6208.08	6152.71	6388.34	6549.99	146.395	10308.7	9839.42	20733.7	21064.6	191.349	47628.8	27475.1
9.3516	27225.2	13713.3	67074.7	17.1901	27583.5	16891.7	82010.5	2.2611	3441.95	2616.25	9278.78	1.22939	25.8046	24.7135	25.5633	24.3372	7.02214	180.096	197.851	187.735	192.893	18.7125	257.934	263.636	254.547	269.631	28.3113	378.684	386.423	401.414	388.843	34.9806	2139.17	2004.34	2182.72	2036.29	88.1545	8652.03	8777.62	8796.47	9056.08	101.194	7372.31	7285.84	14491.4	14204.8	180.536	46658.3	26621.2
17.2559	47291.4	25534.1	124890	17.6622	28186.2	17186.8	85866.9	2.41022	3943.46	2891.16	10122.2	1.3322	25.9788	28.1388	27.4003	26.2769	6.21076	162.261	174.682	175.146	171.288	11.8477	166.138	169.749	169.866	174.007	22.418	295.164	308.558	318.735	316.97	48.1093	2933.27	2816.49	2947.38	2997.03	64.741	6565.56	6508.32	6675.24	6129.14	117.959	8220.95	8388.84	17537.4	17041.8	199.33	47793.5	30167.5
18.2693	49907.6	27230.7	143481	35.9093	55066	34608.3	180526	2.76912	4479.14	3292.92	12020.7	4.24771	85.8565	89.6699	91.2057	82.7657	5.71266	160.732	151.935	147.907	150.417	13.8618	190.211	201.468	197.209	201.702	28.8423	399.606	410.315	415.027	388.41	49.1799	3013.52	2815.98	2875.39	2867.12	97.7779	10014.5	9248.51	10012.8	9832.89	106.305	7910.58	7343.13	14873.1	14787.6	190.781	46425.7	28385
11.6005	30984.2	17862.6	90113.7	36.1296	57213.9	34385.6	176311	2.84397	4655.94	3267.39	12508.5	2.90245	60.981	58.4586	57.5766	57.3609	7.08352	186.169	182.277	185.368	187.503	14.0428	195.795	198.397	200.084	195.189	25.9036	373.398	342.061	367.268	346.595	48.7651	2920.8	2814.23	2814.93	2935.32	88.1549	8396.73	9012.22	9082.43	8554.39	117.605	8275.28	7910.82	17357.8	17203.6	182.84	45587.7	27506.6
8.3399	22260	12726.5	62538.2	39.0799	63021.5	37375.6	187369	2.9307	4698.81	3514.49	11926.5	1.12924	23.1609	23.9115	22.6478	22.3491	5.64167	153.477	151.511	145.187	155.632	14.6388	208.726	212.722	199.147	211.483	27.2426	375.253	366.732	358.974	390.288	42.1755	2630.34	2484.38	2519.21	2559.95	78.4741	8068.78	7695.7	7628.71	7631.12	101.056	7644.53	7398.01	14796.5	14138.3	152.294	36901.5	23022.5
15.8888	42299.4	24436.9	121219	11.0691	16866.2	10310.5	53992.1	2.78035	4192.25	3224.02	11808.4	4.88785	97.8165	100.848	104.592	97.6955	7.77772	203.914	214.359	212.253	217.753	18.8318	260.082	265.149	261.669	267.595	26.4496	365.355	360.595	354.542	378.186	33.3787	2075.18	2066.98	2092.71	2064.36	77.54	8030.18	7465.19	7335.95	7413.29	131.004	9990	9225.08	18972.4	18909.6	188.754	45537.5	27530.7
6.27929	18296.8	9224.77	47636.1	30.9524	49095.5	30538.6	156116	2.21334	3566.82	2565.76	8977.75	2.03009	43.0982	39.926	41.9109	42.5447	8.80245	234.804	238.825	248.68	239.891	10.4062	143.636	150.409	145.992	154.09	28.5264	395.879	378.53	392.186	404.676	45.4934	2747.69	2688.56	2691.43	2812.98	72.4769	7285.22	7074.73	7515.06	6842.15	140.224	10038.4	9799.04	20173.2	21050.6	193.374	48584.8	29203.6
18.6196	53711	26557	146153	22.3189	37136.3	20349.9	112097	2.72777	4366.56	3205.01	10975.3	2.75684	57.6304	55.3513	56.8568	58.6818	8.93021	247.353	246.46	240.956	244.739	18.6238	274.032	258.555	252.615	254.801	21.0257	285.131	280.044	275.442	300.541	30.8267	1884.02	1927.49	1868.07	1883.46	91.317	8686.02	9353.11	9055.97	8962.66	149.151	10751	10378.5	22829.2	22442.6	163.741	40180.8	23994.9
9.11431	26600.6	12772.5	71174.2	33.8827	55908.7	33400.7	162241	2.37587	3647.75	2802.68	10300.4	1.96902	40.8315	41.1743	39.5454	42.0072	8.76336	226.516	236.441	241.148	229.636	11.707	165.395	164.77	166.877	166.384	25.12	353.213	332.638	344.756	338.694	39.1454	2447.29	2331.25	2365.57	2301.34	73.0805	7151.73	6977.06	7168.46	7414.57	130.292	9643.98	9243.81	19837	18166.5	157.042	40418	23531.6
13.3673	36213	19302.2	99937.2	39.3461	60145.1	38449.9	202211	2.10025	3459.11	2410.44	9159.03	2.98613	58.255	61.9685	61.2935	60.7793	8.263	230.552	223.152	212.179	214.481	14.6608	206.012	206.257	205.479	214.119	25.8306	346.96	360.888	370.985	364.01	37.994	2381.83	2211.88	2308.69	2235.07	61.4125	5826.45	6111.43	6152.92	5978.46	144.127	10858.8	9622.98	22064.1	21571.8	185.799	44061.6	27445.1
9.54334	26051.2	14208	68998.1	19.8121	30462.1	18606.6	94125.7	2.83065	4468.29	3169.04	12044.3	3.3442	66.0822	68.2371	71.3405	68.088	5.87599	157.634	164.813	159.304	164.19	19.3465	262.34	262.801	271.248	271.597	23.1694	306.738	312.584	329.522	307.014	39.214	2252.11	2322.06	2293.96	2436.83	94.4524	9501.13	9645.28	8999.31	9569.07	111.25	7718.7	8011.39	16262.1	15859.3	184.076	47501.7	28132.4
8.44257	22734.3	12729.3	65217.4	24.8551	39336.4	22892.1	119042	2.85376	4326.26	3347.45	12123.1	2.00778	42.6507	39.5581	39.8732	39.7292	6.71196	178.331	183.59	185.423	186.091	15.5843	218.591	212.109	225.457	218.114	29.9262	405.83	406.538	409.276	409.45	58.8879	3541.64	3467.42	3558.91	3500.69	75.9091	7321.8	7416.4	7705.73	7291.75	137.249	9885.14	9773.77	19600	19276.3	170.517	43455.8	24145.6
8.41336	24436.4	12695.9	64508.8	13.5026	21554.6	13041.6	63516	2.73907	4453.73	3253.86	11303	2.32151	45.5787	45.64	45.4929	46.0486	9.06801	235.728	239.869	232.839	240.247	11.3568	154.967	160.312	165.38	157.679	24.5079	342.735	340.399	353.201	328.555	40.5583	2474.99	2477.54	2371.62	2420.48	76.4746	7752.28	7308.91	7264.33	7360.13	141.148	10518.2	10115.1	21044.3	21351.4	155.687	37369.3	23813.1
14.1073	38943.2	19962.6	108877	11.2896	18202.5	10121.2	56351.8	2.55123	4167.7	2987.45	10675.4	4.81067	103.169	94.002	99.1003	100.111	5.07099	137.377	141.627	140.549	133.647	12.5223	180.249	172.146	181.876	175.91	27.7741	400.831	386.653	399.196	401.299	55.6374	3172.33	3318.89	3473.82	3330.23	79.0187	7781.33	7934.38	8058.34	7883.46	106.317	7838.41	7354.53	15470.5	16239	164.444	41319.7	24837.4
10.3351	30200	15515.7	74378.2	30.9297	48520.8	28745.8	149384	2.93506	4625.7	3555.09	12524.2	1.57268	33.2305	32.1094	32.9514	32.8629	9.10618	233.795	235.459	235.219	251.86	16.6514	232.887	224.398	243.737	228.443	27.5652	367.35	373.196	371.313	364.516	45.3921	2688.55	2592.46	2579.25	2720.84	71.9696	7036.16	7397.92	7127.24	7247.44	121.671	8842.14	8580.73	17042.7	18033.9	180.339	42939	26257.2
16.9985	45771.7	23752.1	122651	22.5779	35327.2	20872.3	108330	2.62623	4096.52	2997.75	11533.2	4.37886	88.7123	92.8156	86.4573	86.9661	5.42018	152.254	141.117	152.714	139.822	16.7749	242.623	241.137	233.543	229.43	26.2205	344.076	375.3	375.036	352.085	59.2661	3547.45	3621.77	3484.81	3677.82	80.1304	8298.42	7641.63	7630.26	8156.91	146.878	10406	10204	20961.7	20891.4	178.877	45962.6	26591.8
17.92	48474.5	26480.6	135970	14.7324	24130.5	14476.9	74128.6	2.99453	4903.08	3591.54	13260.4	3.97533	79.2801	80.4114	81.1245	78.9122	9.92852	256.176	264.731	266.698	267.027	17.8395	243.612	245.428	262.985	241.732	26.3079	351.471	371.058	354.686	376.593	54.7242	3123.54	3372.58	3157.85	3283.92	77.7562	7821.8	7674.5	7699.46	8018.9	137.737	10001.9	9752.07	19308.6	20613.8	171.736	41434.5	26332.1
10.448	29618.7	15759.5	77053.9	17.0208	27295.5	15546.7	81376	2.51318	3822.76	2944.77	10738.8	2.95962	62.1817	62.8855	58.9594	60.4159	5.03634	130.085	128.916	140.566	141.249	14.8175	218.251	212.999	211.725	219.618	29.8486	395.426	430.051	405.732	407.919	32.9126	1985.34	2011.52	1971.97	1902.8	87.9726	8834.26	8645.86	8303.07	8645.55	133.849	9696.88	9253.9	18955.9	20124.1	156.114	36844	23452.1
15.788	43318.5	23107.8	122438	24.2096	37097.8	23736.2	113096	2.10621	3198.09	2573.63	9313.85	2.4893	48.9392	50.0243	51.2182	53.5185	9.50678	254.025	267.46	259.571	244.667	13.1749	182.453	190.326	181.709	183.636	29.2121	398.841	388.114	418.638	410.557	47.9672	2982.33	2760.06	2738.1	2897.58	69.4259	6537.21	7056.14	6693.11	6670.75	136.344	9502.13	9329.39	20703	20346.4	189.67	44979	28586.4
9.41892	26632.6	13205.2	67877.7	31.8634	52924.8	30276.2	155007	2.98492	4513.01	3596.95	12879.8	3.66345	72.7885	75.2948	77.2088	72.3855	8.26327	230.508	214.343	222.242	228.106	19.7869	291.324	280.54	271.813	268.984	26.1114	343.083	353.715	370.256	371.427	43.2959	2687.88	2502.11	2659.13	2588.45	67.9757	6872.18	6469.58	6487.39	6770.69	106.257	7436.9	7222.86	15286.4	15116.6	187.459	48062.3	26330.9
18.8193	54543.5	28786.2	139558	24.8628	39709.5	22819.9	121099	2.77993	4542.29	3384.12	11287.9	3.92868	82.2404	77.3581	82.3683	81.2881	7.28428	198.469	204.072	199.506	186.325	10.8415	149.043	152.428	158.783	150.054	21.7204	290.301	303.255	297.378	297.863	51.6554	3100.86	2991.51	3217.53	3022.64	79.1972	7832.65	8198.03	7884.22	7982.11	108.087	8111.17	7764.26	16137.7	15133.6	193.262	48220.6	28887.7
13.8579	39802.1	20921.3	106342	35.7808	54808.2	32394.7	175372	2.78945	4380.6	3193.42	12014.1	2.13527	44.6735	45.8141	41.6454	44.7116	5.57862	147.662	155.885	142.98	150.125	15.1455	224.041	215.922	224.45	220.33	28.1076	371.487	398.551	384.095	388.954	44.2484	2586.42	2740.69	2576.28	2533.96	68.7332	6524.88	6469.33	6843.57	7076.95	142.235	10850.6	9733.75	21505.4	20008.8	174.837	42964.6	26493.3
9.62482	25918.9	14492.7	74088.9	38.8023	62038.2	36315.9	188366	2.1806	3476.45	2671.92	9160.89	3.62231	74.1443	73.1598	71.1579	72.559	7.23994	197.9	194.436	197.967	185.281	16.5311	240.018	242.916	231.014	244.995	27.6928	384.934	383.907	393.294	370.626	47.344	2896.19	2708.06	2881.71	2783.31	85.5983	8523.07	8473.73	8286.9	8303.72	149.457	10699.7	10973.9	22372	22837	184.319	46635.5	25960.8
15.1931	40543.7	21485.6	116320	27.6512	44762.3	25255.4	130760	2.33449	3859.78	2609.73	9989.83	2.445	50.4738	52.2253	48.2519	48.096	5.00429	131.197	134.307	137.879	140.949	16.0248	216.974	226.68	221.198	218.467	22.8005	321.88	321.161	305.423	316.823	41.9011	2482.82	2424.47	2409.04	2438.38	62.4207	6120.6	6341.39	5874.07	6373.25	149.628	11289.8	9997.21	22889.9	21573.1	183.122	44344	27140.6
10.9588	31526.3	15521.2	82758.4	26.571	41093.6	25740.9	124014	2.5473	3961.39	3091.69	10728.3	1.34891	27.3942	28.1423	27.4467	28.4194	7.40439	191.025	206.708	199.201	193.654	17.5917	251.808	245.898	236.471	239.035	23.5171	330.31	323.68	317.955	328.427	42.0801	2571.36	2458.57	2487.34	2404.64	74.5447	7459.6	7591.69	7640.3	7634.33	111.695	7832.08	8018.01	15783.7	16050.6	159.778	39897.1	24487.9
13.5245	36922.7	19258.3	105869	28.006	43162.7	26261.2	135795	2.62141	4167.71	3113.03	10680.1	2.49255	50.6992	52.4825	51.7116	50.8906	6.68325	178.532	181.258	172.61	185.524	13.2196	188.615	190.399	179.346	188.705	23.1907	322.352	324.954	335.063	324.552	54.1981	3187.88	3237.16	3346.09	3172.7	81.9959	8117.66	8024.53	7839.91	8488.23	123.188	8911.81	8558.61	17682.8	17395.3	162.931	39217.5	23077.3
11.2249	30936.7	16923.2	80548.4	38.8943	60359.9	38229.4	188395	2.36556	3630.03	2670.94	9941.27	3.40112	70.1997	70.4653	69.0262	66.2336	7.34616	199.27	207.133	195.754	205.466	19.9666	282.498	277.237	270.691	268.618	25.646	351.961	368.118	354.591	365.597	55.8698	3313.46	3180.89	3174.57	3289.91	86.6183	8341.23	8806.45	8954.85	8234.18	134.745	9560.16	9682.77	19509.5	19915.3	163.343	39035.6	23708.9
7.09868	18898.8	10585.7	53394.1	34.9245	55864.6	33485.1	170425	2.85573	4650.83	3252.19	11874.1	4.41493	89.794	91.5184	90.9988	86.3781	6.25047	175.231	174.125	172.848	167.931	17.0106	241.153	244.036	238.994	234.766	25.0083	342.684	358.537	350.31	361.562	32.8996	1887.8	1951.01	1918.98	1986.31	91.2037	8697.89	9120.25	8836.35	9270.84	124.743	8718.37	8391.84	18899.3	18941.4	180.257	46097	27467.9
11.2763	31967.9	15740.5	81634.5	16.1653	25156	15440.6	77637.2	2.93118	4499.3	3300.26	12745.3	1.38356	27.9346	29.5378	27.1568	29.1782	6.47139	166.052	176.743	180.19	177.069	17.254	234.345	234.12	241.991	253.412	29.0013	380.869	410.165	384.006	415.739	54.2701	3245.91	3265.68	3363.61	3370.69	74.1904	7166.1	7058.24	7397.84	7671.6	116.591	8089.6	8226.61	16346.6	16589.1	169.317	42352.9	24533.5
9.956	28686.4	14464.9	72684.3	17.2436	26432.8	15449.1	85721.1	2.26188	3445.59	2554.94	9131.94	3.1554	64.4994	67.1263	63.6463	64.709	9.09147	252.48	236.508	237.322	240.532	11.5505	164.942	156.954	159.858	155.497	22.7181	326.624	320.843	326.325	320.692	57.132	3362.66	3377.8	3526.68	3436.47	77.6278	7955.15	8052.75	7908.8	8050.18	133.57	9411.2	9604.49	18791.5	19420.3	152.436	36872.3	21606.8
14.1941	40122.8	20080.6	111216	26.8252	43372.8	25219.1	129427	2.83351	4445.15	3325.34	12197.6	1.71363	36.0067	33.954	34.3927	33.6337	8.24912	215.606	232.084	225.178	229.849	16.0938	218.471	219.77	226.67	233.839	20.8911	287.499	285.054	284.105	280.29	30.5391	1838.03	1762.55	1810.18	1864.51	74.6922	7711.01	7729.2	7673.45	7668.43	122.211	8915.66	8678.62	17857.3	18285.6	171.259	42453.6	23899
18.7417	53356.7	27910.9	135146	37.7917	57785.4	35700.8	186514	2.16339	3291.85	2484	8919	3.03497	59.1181	62.7845	60.3838	59.3022	7.05622	180.957	181.467	194.926	181.299	15.4612	227.138	225.713	217.043	209.332	24.6768	327.341	342.587	348.703	341.919	47.9712	2950.01	3000.58	2977.75	2902.85	60.9615	6264.88	5960.62	6298.27	5740.52	125.446	9184.42	8934.52	17453.8	17547.8	187.427	46236.9	27619.8
10.0876	27492.1	14409.9	78359.6	22.4679	35439.8	20508.9	110239	2.61248	4048.16	3135.96	10504	4.65199	100.008	91.5686	91.8065	91.236	7.66111	214.935	199.201	207.613	213.672	12.5886	182.97	172.565	180.477	185.59	26.6151	370.214	364.957	366.956	361.923	54.046	3260.36	3318.92	3172.85	3255.57	68.6628	6912.57	6446.65	6619.43	6906.28	137.296	9619.9	9249.8	19328.1	21029.8	186.772	48594.8	28389.9
14.5388	42456.4	21076	108387	28.9718	48046	28198.6	135646	2.89485	4641.42	3239.74	11897.7	1.64918	35.1087	35.0993	33.3922	32.9782	9.74704	262.273	250.189	259.108	266.128	12.3227	178.661	166.309	172.644	171.938	26.8213	381.237	363.738	371.24	353.973	42.8864	2647.95	2471.48	2574.63	2520.25	82.6372	8395.27	7780.91	7791.97	8258.63	113.274	8512.69	7868.6	16511.8	15753.6	193.488	49203.3	27867.4
13.2721	35969.9	18549.1	102086	26.7405	44125.8	24484.3	125403	2.71671	4328.36	3226.2	11146.8	4.3626	88.9418	93.6283	85.0724	89.3294	7.16057	191.15	202.098	195.041	195.927	11.8312	162.589	164.674	165.241	174.02	22.5592	301.227	311.403	297.652	323.047	38.9744	2262.07	2319.61	2369.05	2395.52	85.2349	8420.95	8303.61	8808.1	8244.85	100.644	7411.68	7093.95	15216.4	14038.6	199.359	50279.2	28323.9
7.77375	22497.8	11194.5	59057.2	32.5718	50783.8	30802.4	155604	2.57298	4281.9	3084.76	10316.6	1.24215	26.158	26.013	24.2777	26.3919	8.61873	223.739	243.155	224.699	222.764	13.099	177.956	182.531	190.13	179.659	28.9853	394.517	395.406	391.883	391.333	57.8671	3364.89	3371.38	3385.63	3486.59	96.7011	9297.53	9559.48	9558.95	9195.2	105.169	7467.63	7722.76	14760.9	15713.5	159.647	41140.8	22950.2
5.63733	15150.3	8023.38	41801.2	26.1787	41428.3	23595.9	124256	2.83472	4630.54	3228.37	11456.6	1.5782	32.3658	33.2863	33.4762	32.4092	7.34054	197.828	200.666	198.162	206.242	11.5751	159.386	157.583	170.99	163.889	29.7998	395.117	402.272	422.086	415.479	40.7636	2379.76	2447.24	2320.66	2493.94	77.0262	7607.28	7866.59	7563.41	7650.99	126.357	8799.43	9135.65	18307.1	18045.5	168.839	40759.6	23863
8.81014	25466.3	13417.1	67771.1	20.7128	32665.9	18610.7	105414	2.40545	3969.68	2773.47	10385.1	3.91655	78.4881	82.1009	77.4723	79.9723	9.33473	255.026	250.04	260.55	252.563	12.9764	179.405	186.609	185.61	176.887	24.3281	349.391	327.258	328.553	339.675	47.4657	2942.82	2719.34	2864.87	2714.6	82.3957	8501.89	7928.2	8253.73	8162.97	125.724	8711.69	9222.64	17802.8	19072.2	175.407	45266.3	25138.9
6.4493	18311.2	9500.82	47093.1	30.2062	48881.4	28827.5	144540	2.36562	3693.82	2889.75	9662.07	1.99167	40.0422	38.7754	42.0298	39.5845	5.86744	154.169	155.11	153.566	154.782	17.0925	243.023	233.356	234.73	232.216	24.2329	346.433	330.341	340.099	337.597	37.3332	2217.53	2313.89	2294.99	2162.94	68.6381	6659.04	6859.51	6970.73	6676.81	129.547	9544.46	8908.02	18129.9	19289	199.174	49127.9	30244.9
17.6016	50578	24707.1	126230	27.2425	44555.2	25606.8	128416	2.60849	4007.39	3002.41	10500.6	3.31176	70.4267	66.5427	71.2283	69.1711	8.66729	234.625	225.945	229.321	236.226	18.1123	253.454	260.015	258.362	265.905	28.1209	386.998	369.762	395.325	402.594	56.4784	3287.24	3401.57	3349.18	3445.57	75.246	7471.79	7466.57	7797.05	7381.5	129.4	9181.91	9119.58	18895.9	18210.7	168.88	41462.8	25019.6
10.5461	29892	16194.8	78487.4	26.3896	41358.1	25595	134311	2.4293	3709.91	2935.34	10056.7	4.53508	88.9006	89.1035	93.5478	89.5559	9.75181	262.102	251.46	256.424	259.743	17.4069	235.603	245.218	240.504	254.183	21.1393	292.545	298.459	284.137	295.523	34.1841	2009.87	1990.4	2005.01	2068.44	63.8915	6504.72	6075.68	6316.02	6278.3	145.514	10349.5	9878.94	22265.2	21667.8	161.769	41199.1	23219.1
5.16266	14792.7	7517.39	39790.2	39.7814	61241.5	38736.3	186394	2.90598	4750.54	3385.84	11709.6	3.4435	71.3023	70.7942	68.2235	72.1492	5.34596	145.531	140.686	139.797	145.6	16.7923	225.928	227.565	245.17	235.909	22.1333	293.832	295.129	309.646	317.28	55.2454	3349.84	3162.49	3187.98	3239.68	83.2702	8312.06	8521.32	7933.62	8457.05	122.264	8769.08	8376.52	18698.3	17225.9	181.722	45340	26840.1
17.7463	51482.5	26516.7	136268	13.6313	20912.7	12773.8	66916.8	2.91564	4493.19	3591.84	12543.4	1.97325	39.3475	38.5492	40.6725	40.0096	5.17187	142.363	135.89	142.343	142.321	14.244	210.13	191.513	198.709	206.95	27.6209	371.345	382.964	375.28	372.819	44.8238	2669.33	2721.59	2752.4	2802.51	92.3018	9011.73	9128.35	9301.21	9162.93	132.679	9967.08	9214.38	18707.4	19954.9	178.197	43207.1	27082.9
10.2307	28772.8	14608.4	75737.3	35.4446	57279.4	32139.9	168174	2.96114	4724.06	3580.2	11998.2	1.58277	30.9871	31.0441	32.8371	31.7441	7.50003	205.544	208.877	208.017	205.226	11.878	163.719	176.361	167.415	171.711	21.8264	314.883	307.951	299.129	286.946	46.735	2666.55	2910	2917.12	2923.69	62.6287	6027	6090.8	6231.59	6032.72	129.918	9365.49	8733.12	19938.9	19714.7	184.426	47200.9	27467.6
15.4768	44710.3	22801.2	122209	23.0222	36199.2	21919.8	114641	2.48627	4067.2	2841.14	10239.6	3.04517	60.3044	60.4012	62.7603	63.568	5.7061	157.79	157.875	149.566	146.425	17.4773	240.906	241.658	243.338	237.251	26.3375	348.201	369.576	354.861	360.048	54.6198	3284.86	3106.57	3307.62	3145.5	92.3549	8842.29	9446.24	9116.06	9430.33	140.044	10384	9878.54	20179.1	20762.6	190.655	48335.4	26921.9
5.41418	14507.8	7897.86	41820.1	39.6561	63185.8	38372.4	186598	2.26946	3509.38	2574.5	9173.49	4.3712	91.8019	86.273	85.9396	91.5912	8.19883	230.23	219.748	213.578	210.684	19.6378	270.236	278.932	269.42	284.447	29.9812	418.127	403.481	398.88	415.184	32.7275	2026.06	1949.67	1910.85	1923.17	95.2798	9067.48	9656.4	9308.39	9111.84	147.398	10727.6	9843.68	21897.8	21451.3	160.544	40025	23459.3
8.94295	23857.4	13650.7	66838	29.3939	47236.6	28787.3	140625	2.23722	3434.16	2563.4	9625.23	3.89216	78.0291	79.1635	82.5532	82.3175	5.11595	138.542	134.051	142.866	132.188	12.3248	181.559	182.952	178.974	171.922	27.3004	360.619	362.446	376.952	393.005	41.2435	2394.07	2358.95	2439.54	2441.83	84.0232	8623.68	8325.95	8011.72	7920.94	102.418	7139.11	6884.71	15300.2	14432.2	159.536	40220.1	24397.3
7.38145	20689.8	11371.9	53358.2	28.2052	45039.1	26622.4	141000	2.36807	3665.84	2704.21	9799.73	1.50783	31.4726	30.0439	29.8308	32.0578	5.62135	146.802	155.108	144.24	152.499	12.092	163.418	174.883	171.786	178.414	20.8352	295.719	290.446	296.044	283.311	45.0669	2582.01	2718.25	2819.27	2597.86	62.5398	6350.26	6370.21	6449.26	6223.27	105.718	7750.98	7758.35	14976.7	15005.2	199.147	49900.9	28921.1
8.48575	24049.3	13054.2	66088.8	35.1891	57599.7	33620.6	164854	2.11766	3479.25	2474.5	8895.98	3.53335	68.9206	72.3244	73.7775	71.6099	5.44177	139.725	150.027	146.143	146.45	19.1949	263.872	280.157	262.268	265.444	24.7835	356.559	334.607	332.197	332.364	50.3729	3078.44	3113.31	3019.94	3081.22	63.7797	6277.57	6365.78	6088.46	6364.04	117.929	8348.94	8440.55	17404	17049.5	154.149	39449.1	22189.4
13.9891	38723.7	19522.3	108819	11.4531	18978	10549.9	54942.4	2.56889	4179.23	3132.89	11232.4	3.47481	73.323	73.4886	72.6041	72.3424	9.76585	267.594	264.984	264.592	261.518	14.2851	199.007	198.657	202.462	205.832	22.4967	308.374	304.982	297.913	310.711	44.572	2614.31	2577.25	2706.29	2719.54	77.7229	7553.72	7876.28	7302.5	7953.11	108.292	7976.22	7903.28	15807.1	15172.5	187.802	46351.2	27570
15.9999	42730.4	23595.4	117386	16.9525	27148.2	16312.8	80060.5	2.43703	4051.62	2984.24	10721.3	2.41048	48.119	51.8295	48.1633	48.199	5.02197	128.411	133.063	132.728	131.217	16.4558	242.849	236.859	221.656	222.227	23.8027	329.678	334.192	316.097	313.725	45.8384	2694.73	2831.27	2743.61	2619.83	99.1295	9875.46	10017.2	9451.69	10092.2	145.451	10171	9896.69	21813.3	21603.3	198.278	48769.8	29414.1
13.8188	36783.7	20871	99775.6	33.7921	54356.5	31623.2	172650	2.18537	3610.2	2491.45	9136.36	2.62965	52.1081	54.6195	55.4153	56.3678	9.82786	267.838	271.545	274.992	254.71	15.9717	231.46	216.436	218.845	232.599	23.5628	334.715	325.211	318.085	327.867	47.5373	2750.58	2912.19	2914.33	2763.42	83.3687	7943.86	8340.5	8491.7	7959.68	118.159	8182.91	8245.21	18127.3	17743.8	191.358	48162.8	27621.9
11.073	31104.4	15563	84807.1	22.948	37554	20699.1	114039	2.29647	3600.48	2599.28	9769.78	3.84638	77.0147	75.3541	79.3792	78.9291	8.06428	225.346	222.691	217.264	220.685	13.1959	179.383	192.447	185.322	185.28	27.1325	387.749	379.891	390.123	358.318	45.2891	2682.64	2634.4	2575.14	2679.52	63.1698	5968.54	6203.03	5937.62	6448.97	106.9	7743.96	7740.51	14900.9	15704.4	187.889	44349.3	27977.9
11.2888	33014.7	15756	85519.6	20.5453	34129	19532.8	99201.6	2.7183	4435.32	3335.11	11443.4	4.00087	82.9381	84.8844	78.0689	82.9225	6.39304	172.812	169.797	178.847	175.463	16.1937	234.108	229.622	219.071	226.629	25.8078	359.964	356.826	367.499	338.388	55.5268	3465.13	3339.59	3374.98	3386.02	81.8237	8241.17	8278.36	8260.61	8000.38	136.257	9614.12	9689.04	20296.8	19366.7	164.756	39003.8	24371.1
14.7558	39910.4	21728.4	106055	14.9766	25092.1	14249.5	71913.9	2.80433	4272.89	3415.6	11923.8	3.82306	78.9711	74.4996	79.0893	78.7208	8.09176	207.289	208.176	208.901	211.278	18.1664	255.327	254.075	246.75	259.396	26.379	370.529	347.526	367.948	352.321	52.8734	3083.85	3011.73	3008.35	3269.87	74.661	7457.87	7188.95	7502.71	7585.16	127.317	8847.57	8850.75	18553.3	18881.6	188.321	46459.7	26666.5
6.40547	17658.7	9720.17	48766.8	22.6113	37684.4	21768.9	109373	2.5746	4125.42	2884.09	10854.5	4.12986	82.3032	82.9574	88.1113	83.9311	7.7961	210.429	201.23	209.623	214.05	18.8182	256.1	259.567	273.105	261.27	27.9236	373.626	373.234	367.749	391.709	37.9719	2373.2	2304.91	2376.19	2265.29	79.2502	7753.96	7537.39	8058.98	7848.18	141.008	9875.31	9819.48	20574.8	21108.6	187.104	44592	27542.4
18.2417	50894.5	26719.8	136944	17.8423	28255.2	17275.9	91706.1	2.49715	3884.95	2868.4	10451.2	1.54174	31.2843	31.2386	31.5348	32.7103	5.41503	148.775	145.77	151.959	141.422	17.0577	252.457	241.378	231.933	248.536	25.6299	349.674	349.313	336.716	340.372	33.41	1974.83	2032.32	1975.48	1897.53	77.8927	7965.76	7926.43	8037.45	7821.19	107.187	8082.55	7595.11	15518.9	15636.1	151.165	38373.9	22230.2
8.77503	25341.1	12304	65223.9	37.7277	58661.3	36267	185148	2.12736	3509.25	2561.48	9399.37	3.19593	64.6199	65.3117	63.1292	67.0259	6.09606	160.986	157.249	170.117	156.69	16.4535	225.92	242.315	238.433	225.735	29.9204	410.877	416.408	431.223	409.61	40.2032	2350.12	2468.39	2433.95	2299.96	76.31	7760.5	7340.51	7797.31	7417.15	130.285	9051.44	9550.14	19152.7	18732.1	193.47	48611.9	28215.9
19.3089	54422	27105.8	144465	37.6594	60324.2	35342.4	193993	2.16097	3388.71	2430.64	8976.8	3.86806	76.6195	75.3308	76.4572	81.8756	7.66793	197.93	214.487	206.97	207.022	11.5432	156.379	160.28	165.559	168.944	23.1492	304.45	331.815	329.37	305.493	45.087	2755.73	2673.69	2598.1	2646.48	87.1739	8949.14	8810	8866.63	8453.5	127.511	8851.71	8883.26	18911	18850.4	189.007	45987.6	26762.7
9.89532	26723.7	14721.5	74337.4	21.076	34506.5	19125.6	106907	2.921	4594.14	3554.69	12178	4.93503	102.164	103.672	105.134	99.5306	9.56263	259.661	261.662	260.322	248.878	10.0419	140.32	137.673	148.732	137.202	26.8435	379.282	377.069	359.385	385.214	39.6847	2468.95	2321.87	2422.12	2467.52	89.8933	9265.19	8461.57	9230.56	8598.62	137.886	9752.89	10006.9	20089.6	20157.5	152.45	38952.5	22166.7
16.4454	47408.9	24300.4	128355	15.4094	23443.9	14936.2	75882.2	2.70529	4409.68	3079.98	11016.9	2.10139	44.9871	42.0119	44.2474	45.0055	5.20052	132.998	144.445	143.287	134.06	18.987	266.281	274.111	278.462	275.625	24.5477	348.945	323.419	345.26	321.769	55.8567	3337.04	3426.54	3351.78	3191.38	66.763	6498.57	6308.74	6680.69	6570.34	116.47	8125.72	8415.2	16323.3	17676	195.896	48700.1	29550.6
19.3636	56332	28253.4	152675	32.7083	53693.9	31212.2	163307	2.29893	3548.09	2784.52	9319.05	3.82524	82.1935	78.5806	78.8849	75.7855	9.32869	242.839	244.774	246.245	243.688	18.0185	262.801	255.197	243.602	250.473	21.1773	283.435	304.143	291.34	299.994	38.0813	2171.17	2186.17	2384.59	2220.22	89.4311	8737.24	9181.41	8815.83	8475.54	125.143	9123.19	8888.09	18454.1	17962.5	183.498	46396.5	27178.6
5.49173	14933.7	7918.46	39293.7	20.3437	32732.4	19344.3	95221.4	2.89863	4801.15	3303.24	12493.1	1.36593	28.7923	27.3186	29.3551	28.6529	7.97079	217.375	214.177	203.789	221.054	16.1857	237.17	228.559	235.16	219.734	25.1614	355.355	345.098	356.99	335.367	31.0727	1930.28	1803.96	1923.59	1894.03	78.3199	7724.39	7578.29	7382.32	7747.85	134.464	9958.74	9212.11	19273.8	20578.1	161.452	39841.5	24061.5
12.0465	33455.9	18531.3	90751.8	22.5754	35017.1	20549.2	112695	2.76973	4233.45	3231.19	11803.6	1.7517	34.1727	36.6065	36.3867	35.8513	5.55068	145.988	146.012	150.188	144.195	16.7954	240.043	236.2	232.342	247.415	20.7077	282.686	282.539	286.694	295.721	47.8418	2744.37	2809.77	2738.89	2749.19	62.0537	6276.87	5837.99	6048.38	6095.52	126.471	9353.53	9057.69	17598.2	18904	164.464	40823.9	24204.9
5.75672	16111.3	8441.49	44175.5	23.4684	38497.3	22962.9	115014	2.32974	3774.4	2847.24	10082.4	1.83633	37.197	37.9076	37.844	37.8427	9.70233	270.895	248.495	255.971	270.426	18.2354	257.38	269.899	269.407	260.143	22.4789	299.543	314.093	318.509	295.732	46.9258	2764.55	2921.3	2884.27	2676.51	69.739	6985.14	6682.92	6823.78	6899.14	127.334	9377.85	9197.38	17742	18928.8	153.819	38273.9	22947.9
11.8636	33389.5	17706.8	89499.5	19.5148	30031.6	18958.7	95240.1	2.72151	4526.48	3317.48	12029.8	2.5401	53.0753	50.2852	53.9092	53.7913	8.68368	222.213	243.802	228.827	223.882	13.0854	177.469	178.047	184.748	184.84	27.2622	365.257	371.04	376.706	359.04	50.6755	3178.72	2943.4	3071.9	2999.09	81.078	7973.08	7900.07	8094.72	7716.22	143.101	10036.8	9711.84	21247.9	20812.8	197.033	48730.5	29340.6
18.8561	52006.3	27604.4	138437	9.79548	15235	9300.77	46859.9	2.50269	4124.71	2878.53	10676	1.3988	29.4907	28.1264	27.8951	29.6044	7.88868	214.58	215.648	214.768	212.324	17.4928	259.115	236.355	240.301	244.89	20.7607	291.983	290.587	299.691	279.205	58.3984	3548.51	3628.05	3450.21	3640.18	75.1002	7287.21	7350.52	7124.45	7785.01	148.549	10942.6	10840.8	21976.7	22385.9	197.176	46484.6	27766.1
18.891	50856.5	26552.6	145155	17.4864	28806.9	16270.7	83828.4	2.83763	4446.17	3297.36	11689.6	1.9839	39.3236	42.4068	39.451	41.3876	6.9599	179.906	187.145	188.583	189.249	11.9846	164.04	170.594	173.144	166.421	24.3709	326.461	321.767	320.306	328.776	54.1451	3211.42	3112.18	3127.51	3174.13	79.4617	7663.61	7848.38	7730.28	7498.64	116.201	8640.22	8466.04	16589.8	16989.5	169.328	42907.7	25235.5
12.6428	35905.7	18787.8	99768.5	12.6969	21282.1	12036.5	63985.9	2.26979	3583.27	2761.82	9479.85	2.41185	47.3476	49.6008	51.6375	47.7863	8.75653	238.491	234.521	227.018	235.808	14.4742	203.858	206.892	208.838	195.965	28.065	401.506	394.078	386.989	376.585	47.2022	2946.45	2953.26	2838.19	2764.2	92.4996	9257.31	9517.87	9078.02	9571.77	131.119	9439.65	8953.15	18300.4	18962.8	170.242	41840.2	24542.4
19.5086	55742.9	27402.2	147404	13.0112	20043.3	11857.8	63499.3	2.63154	4176.53	3158.22	10968.2	3.65167	72.3957	74.7332	71.5193	76.9065	5.37004	146.145	141.792	150.535	140.74	19.014	265.709	277.133	274.676	256.401	24.1038	334.672	339.727	329.568	342.662	47.8183	2742.54	2778.56	2793.76	2730.84	96.0878	9463.88	9576.97	9695.77	9220.14	135.619	9959.31	9705.68	19184.9	19680.8	153.834	39078.6	21390.1
18.5414	51822.3	26513.3	140134	14.6498	22274.8	14365.9	69922.7	2.63428	4331.37	3088.13	11187.6	2.63938	54.9809	51.6814	55.9832	51.5041	8.37127	236.396	220.162	215.909	233.643	17.8311	253.279	248.713	239.544	242.81	20.7909	276.057	287.097	280.758	299.836	35.6007	2206.41	2215.48	2216.13	2095.96	79.5322	7863.16	7717.17	7510.55	8142.55	102.942	7327.38	6908.22	15452.3	15521	184.712	44422.7	27806.5
9.66757	26818.4	14826.1	74353.5	38.9847	63483.2	36294.8	193794	2.5209	4154.99	3068.47	10378.3	4.74473	101.808	99.9911	99.2075	101.897	7.84492	202.925	211.504	211.232	215.636	12.028	178.053	169.173	175.842	172.915	22.2136	314.431	317.886	294.968	308.249	35.7701	2185.24	2091.72	2217.28	2185.27	96.0467	9205.93	9253.4	9272.61	9538.66	108.774	8184.37	7439.32	16362.2	16172.2	191.325	48655.7	28985.5
8.98558	24016.7	13198	67434	17.2681	26814.5	15964.8	85790.7	2.95931	4817.7	3426.68	11920.2	2.05252	43.5362	40.517	41.0207	40.7768	6.5911	175.445	170.821	169.552	184.974	18.6722	262.082	264.91	259.224	276.863	22.1921	291.988	304.553	302.764	314.648	58.0321	3560.46	3403.75	3468.75	3442.79	67.2073	6567.98	6860.66	6540.68	6422.24	126.158	9400.17	8801.35	18846.6	17877.2	194.323	46118.8	27029.1
12.2535	35700	18871.7	95847.6	13.2333	21323.4	12341.4	66451.6	2.68167	4187.06	3037.48	10963.5	2.09126	42.0948	42.7203	41.7059	42.1748	6.80229	187.044	175.697	181.051	190.43	14.5751	198.97	202.412	197.023	209.982	20.2555	283.913	285.536	265.889	272.838	30.9793	1855.9	1894.45	1765.75	1859.29	60.5674	5953.53	5926.81	5697.97	5935.09	101.601	7732.94	7017.28	14620.6	15060.2	164.519	39591.1	25044.8
19.9004	57892.2	30521.4	143902	25.0804	41069.7	24562.7	123244	2.41784	3996.44	2816.39	10378.8	4.68791	95.7428	96.1504	98.0031	96.3721	5.45657	143.719	141.705	154.087	142.482	12.2397	167.33	177.176	168.288	168.684	24.4896	343.052	336.843	322.948	330.615	53.0786	3193.09	3215.27	3271.52	3296.41	69.5672	7030.57	6842.23	7036.66	7213.03	139.933	10638.6	9712.77	19674	19473.6	158.112	40073.4	22182.9
10.5631	29549.5	15340.1	77027.3	22.5638	34969.8	20779.9	113654	2.02622	3338.39	2355.81	8128.32	4.94072	100.631	98.1125	102.678	103.774	5.90131	152.221	153.465	154.169	165.011	14.4166	203.878	198.189	204.03	211.265	20.5074	280.806	280.216	268.961	280.946	31.7707	1807.31	1928.76	1830.54	1945.14	84.1929	8012.7	8560.32	8215.85	8243.97	120.926	8932.75	8662.27	16902.4	18485.2	187.971	48621.2	26885.1
15.6325	45294.9	23623.3	116852	33.5777	55118.2	31227.2	163208	2.4707	3751.86	2888.79	9964.54	4.82302	99.208	97.2982	101.686	94.8573	8.25407	224.482	219.647	229.083	213.891	17.3039	255.537	235.664	244.565	235.812	28.6549	386.321	385.783	375.095	381.037	46.3757	2811.96	2720.75	2777.3	2652.51	96.3709	9326.75	9217.16	9870.14	9120.39	114.07	8562.94	7704.25	16105	17046.5	194.775	49627.9	27527.1
10.4284	28497	15942.8	78882.8	38.0211	63005.6	35879.1	180089	2.17453	3508.4	2493.91	9214.52	3.41058	71.9417	68.8928	69.3661	68.7731	9.94937	261.269	262.322	261.189	263.733	11.0962	155.094	157.962	162.57	150.244	24.5744	342.313	345.772	332.089	327.559	32.9854	1968.33	1992.24	2059.42	2034.87	61.8345	6023.54	6044.08	5962.91	6147.38	120.397	9116.45	8486.29	17758	18390.3	186.413	46708.1	25986.8
8.83897	25657.7	13282.1	66938.1	24.8005	40112	23851.9	120248	2.95427	4755.17	3345.46	12631.3	3.73724	77.933	75.5917	79.622	75.4478	5.709	147.114	151.018	157.137	159.411	18.1991	256.952	248.619	246.738	250.985	28.2977	372.674	375.178	375.332	405.644	55.0028	3126.1	3384.98	3157.14	3405.45	83.821	8002.41	8040.3	8098.89	8306.79	127.35	9050.94	8562.1	17815.7	18203.2	156.453	37925.6	22695.3
15.4134	42617.3	23412.6	118328	34.3291	52680.5	33123.5	171900	2.21811	3345.57	2522.9	8953.9	3.09891	64.5042	62.1619	64.1792	61.9525	7.23566	196.089	197.754	193.686	189.608	19.0927	275.054	269.572	267.098	272.941	24.3848	351.181	322.871	331.317	338.497	38.6884	2284.45	2353.74	2251.41	2342.76	88.6026	8317.08	8588.9	9116.65	8441.77	112.783	8234.47	8018.6	16612.8	17150.1	151.39	37081.6	21231.6
18.4266	50968.5	26967.4	139473	34.4138	54493.1	33714.4	167193	2.37569	3883.59	2880.65	9687.14	2.92625	62.174	57.4568	58.3384	57.142	8.50625	226.511	224.664	229.898	230.746	15.9989	220.563	231.86	216.923	215.453	22.321	321.799	301.937	297.187	313.309	33.0963	1985.72	2008.04	2038.08	1944.62	66.145	6818.13	6727.99	6302.73	6561.37	140.449	9802.26	9635.78	20877.6	21079.3	175.798	42109.5	26976.5
17.8996	51298.8	26368.5	135076	28.4004	47403.8	27290.3	140401	2.19146	3356.75	2489.2	9314.43	3.90302	77.0637	81.5485	80.9597	82.7953	5.62199	155.84	155.532	157.286	147.229	12.1842	166.569	166.22	172.545	165.216	26.6441	371.675	375.833	366.717	363.525	35.0484	1998.55	2178.09	2150.38	1991.08	67.7744	6464.18	6823.16	6395.57	6565.16	148.303	11092	10045.2	20925.6	22372.1	154.66	38211.2	21966.7
5.75757	16397.1	8116.33	43732.8	24.5939	41225.2	23302.2	121794	2.52743	3926.96	3090.59	10604.4	4.84927	102.623	99.7116	95.0099	100.582	6.45845	169.936	170.158	169.746	169.06	14.1304	202.854	192.682	199.02	191.937	25.0016	342.982	341.779	330.009	352.928	58.438	3564.13	3511.01	3619.37	3401.07	74.7092	7186.68	7345.79	7215.55	7120.76	106.582	7664.31	7758.37	16243.3	16074.8	153.397	37905.6	23096.6
13.4308	37994.5	19975.9	96197.8	35.8804	57380.7	32511.6	168256	2.12247	3480.04	2579.12	8842.22	1.05964	22.4732	22.6584	20.9232	22.1441	7.57954	197.58	198.289	196.687	198.411	10.5064	141.932	153.229	152.927	154.249	23.1039	314.754	319.498	331.03	321.097	35.4661	2164.04	2075.64	2018.89	2175.48	64.0595	6152.14	6139.82	6216.31	6517.31	113.151	8499.87	8069.79	16822.1	17022.2	182.068	45183.5	25375.6
10.5706	29354.1	14991.2	78384.1	27.1123	41765	25460.8	129110	2.83009	4703.16	3407.58	11678.3	4.3127	84.0929	92.2184	92.6671	86.7173	5.1383	143.581	140.582	138.167	137.552	19.4163	266.755	267.316	263.204	283.477	28.7161	385.107	383.425	381.483	393.791	57.0557	3341.77	3547.81	3333.72	3347.48	76.5858	7845.96	7779.57	7888.49	7663.26	124.99	9081.67	8620.49	18403.5	18452.6	176.517	43796.1	26725.1
15.9635	44278.4	24453.5	119315	20.4745	32463.5	19993.3	102894	2.83747	4353.39	3436.59	12451.7	1.58024	33.8888	32.5967	32.3651	33.6135	8.69899	233.398	231.853	242.878	236.985	14.7332	208.03	203.862	199.952	217.935	26.4137	367.198	359.128	379.479	347.945	59.2808	3638.98	3507.79	3450.57	3653.16	86.287	8475.48	8822.02	8529.67	8644.94	126.739	9030.34	8553.73	18953.6	18928.5	181.612	45455.2	27868.7
17.5432	47456.3	24880.5	129121	30.0476	49155.3	27663.8	149388	2.85813	4504.41	3278.55	12374.9	3.59308	73.8129	69.958	75.2411	70.8859	6.41364	167.078	170.859	170.216	178.414	19.3781	279.356	265.743	281.851	273.014	24.1335	323.297	315.929	336.602	342.776	34.6631	2056.79	2173.98	2118.66	2021.39	94.7621	9169.56	9206.6	9623.6	9276.27	104.687	7700.29	7066.75	14985.5	15657.2	185.952	46847.4	25869.3
12.0897	33483.6	17019.9	88013	28.6718	45352.6	27630.4	143559	2.91049	4684.78	3277.3	11670.5	2.72181	53.2577	53.7042	53.1324	54.5102	6.58125	172.746	169.694	168.694	181.782	14.8313	207.299	218.249	217.131	204.535	25.5501	357.13	369.282	352.572	368.313	39.6138	2424.57	2418.95	2434.86	2395.88	91.5763	9476.14	8913.05	9167.19	9259.57	149.902	11399.5	10496.2	22171.7	22106.8	165.35	39658.4	25006.2
16.6854	48312.2	24751.7	122219	26.6706	41169.2	26333.4	128925	2.77239	4533.44	3212.56	12188.4	2.10997	44.0098	44.0501	45.2406	43.3594	8.76477	226.024	241.973	234.053	234.139	13.2982	181.726	194.283	194.492	195.171	27.648	362.974	371.771	370.555	363.283	31.8921	1872.11	1938.06	1955.07	1946.81	62.9673	6489.31	6044.63	6530.56	6015.86	118.173	8667.77	7883.12	17781.5	16628.8	154.982	37612.6	22009.6
9.86656	27776.2	14274.4	73969.7	19.9182	31870.8	19303.4	93258.2	2.31651	3623.37	2706.67	10054	4.38042	85.8963	89.6615	92.2515	91.0433	9.81395	264.651	252.95	251.383	276.009	16.263	223.563	221.952	232.297	239.087	22.9754	304.967	314.736	309.437	302.569	39.2506	2322.51	2419.32	2429.64	2326.92	78.2956	7682.07	7414.15	7811.04	7712.09	104.812	7401.9	7685.64	15247.7	15001.3	153.137	39158	22332
6.69505	17909.2	10177.4	49182.4	25.4282	41368.4	24888.1	121530	2.32559	3644.34	2804.03	10071	4.44937	94.9569	94.4292	95.4476	92.4707	6.13053	157.407	158.866	170.623	170.076	13.2245	195.763	189.583	180.192	191.563	28.817	404.558	414.006	382.132	392.769	33.0725	2035.93	2032.55	1925.84	1986.3	95.7176	9397.35	9201.64	9012.86	9898.66	105.813	8072.29	7066.96	15763.8	15785.3	173.725	43414.2	25710.8
14.0893	40524.4	20201.1	101227	9.30003	15146.7	8589.21	47798.1	2.27652	3672.05	2572.5	9558.41	4.25232	83.2988	86.8115	84.9107	88.1128	8.28205	224.753	212.852	224.71	233.869	10.2113	137.718	145.79	149.689	138.644	20.318	292.555	277.715	274.376	281.507	39.0146	2435.7	2295.34	2434.6	2319.86	65.1342	6696.87	6232.57	6388.5	6525.66	113.295	8619.15	8021.41	16281.2	16589.5	172.647	44291.1	25582.8
17.1937	48736.4	24528.3	126839	34.6924	52962.8	31201.9	169341	2.77754	4220.89	3163.81	11224.6	3.61424	72.3244	76.9099	70.9793	75.8486	5.43675	145.551	150.866	140.399	150.116	13.1375	188.239	180.22	185.223	179.158	21.4825	294.422	286.085	289.902	295.994	48.8144	3045.14	2820.94	2920.21	2914.68	99.5535	10018.4	10080.6	9823.79	10120.5	135.345	9913.77	9118.94	20467.5	19667.9	181.938	44034	25553.5
13.5306	38147.6	20128.4	96835.1	29.7584	49067.4	28571.5	149857	2.59034	3985.57	3101.93	11126.6	3.28928	65.0284	65.7695	65.8939	70.6636	7.52693	204.235	204.229	206.21	194.96	17.3478	241.674	244.312	242.237	239.403	21.4129	301.473	282.781	303.078	298.245	48.9466	2899.83	2902.26	2938.17	2791.04	97.8386	10066.9	9295.06	9515.76	9909.93	148.887	11049.7	10101.6	21718.5	22374.4	181.354	46682.3	27439.8
16.7557	48030.3	24740.2	132160	17.6274	27486.3	16505.6	85307.6	2.26721	3526.99	2663.53	9579.66	2.05064	41.9331	41.1493	42.2917	43.4092	9.03934	250.252	239.803	247.005	243.722	14.2675	202.225	201.523	191.882	204.177	21.702	292.107	311.066	301.925	300.853	57.2849	3268.85	3498.93	3285.37	3520.11	73.7583	7433.69	7059.55	7426.11	7224.48	141.705	9895.43	10281.5	20243.8	20946	163.72	42172.6	23644.7
7.47873	20462.3	10485.1	58023.2	26.8797	45074.9	25706.1	132064	2.46882	3951.99	2759.42	10646.6	1.81256	35.9531	38.6802	37.7691	35.7584	5.69091	147.195	150.965	157.882	160.146	19.0179	261.578	263.117	259.024	265.674	28.7027	376.349	392.102	390.267	382.548	50.8706	2988.93	2894.57	2914.37	2957.66	68.4945	6460.96	7102.59	6589.15	6789.17	120.443	8597.77	8239.51	17629.2	18440.9	184.228	44725.3	26799.1
15.3387	43477	23092.2	119130	14.2306	23304.2	13841.2	70312.2	2.65897	4178.51	3040.27	10661.8	2.89708	61.5895	59.8867	58.3868	59.1788	7.98683	215.926	212.561	212.498	210.093	19.6837	273.277	289.172	269.82	280.191	28.1944	389.514	388.316	380.812	403.031	55.7259	3427.25	3175.44	3439.45	3385.23	85.4715	8657.32	8425.71	8634.83	8532.11	106.127	7740.79	7614.5	15225.8	15635.1	170.243	40997.2	24486.4
5.35014	15327.2	8174.74	39468.9	11.9008	19398.4	11263.5	56329.7	2.59853	4098.63	3035.52	11227.4	2.73528	58.1658	54.3674	55.9758	56.7967	7.3306	198.64	206.384	196.524	193.024	17.7395	260.458	246.72	260.878	252.169	29.581	421.63	397.186	401.965	414.241	58.4129	3515.51	3367.31	3369.38	3593.29	91.9271	9276.46	8658.9	8761.91	9494.83	134.466	9746.82	9315.85	19260.2	19463.1	164.081	38742	24807.9
19.1681	55892.4	28709.5	140456	13.3924	21116.3	12582.6	65856.4	2.25891	3645.56	2694.55	9883.12	1.83882	37.4152	36.2166	37.1339	35.9011	8.59422	238.632	227.483	239.569	230.588	14.3137	207.654	193.264	211.976	205.377	21.9293	295.363	309.231	313.241	288.957	58.0719	3518.16	3618.61	3408.46	3393.67	87.4314	8944	8418.1	8895.74	8946.8	113.206	8169.7	8180.08	16795.8	16245.5	184.246	46406.3	25713.1
15.9277	46252.1	23074.9	125413	30.7421	47659.8	28186.3	147272	2.59672	4140.51	3058.7	10497.7	1.67411	35.9615	33.9117	33.0791	34.9222	8.19742	221.739	211.843	218.492	222.956	16.6565	242.308	243.927	242.884	228.78	25.0468	361.248	351.597	362.196	350.635	40.2988	2428.11	2302.47	2459.06	2433.46	81.4935	7665.05	8124.4	7970.42	8068.24	101.252	7247.39	6854.74	14098.5	14564.2	186.816	45040.3	26145.4
19.0864	51372.3	27735.2	145138	32.7007	51517.6	30375.2	158312	2.16326	3370.5	2476.1	9461.07	1.41824	30.3759	27.7912	28.2677	29.5655	5.88492	166.238	156.428	163.448	156.66	11.9931	166.744	165.704	163.363	174.711	21.7665	297.587	313.332	291.534	312.975	51.4442	3200.04	3201.91	3047.43	3082.95	74.9491	7130.94	7432.79	7773.45	7449.23	130.554	9760.32	8883.31	18564.6	19048.3	162.56	39978.1	23853.8
19.5007	56575.2	27525.8	150733	29.3937	45333.2	28417	140341	2.21689	3456.62	2619.32	9546.42	3.70704	74.8746	77.8041	73.6001	72.4321	6.85759	185.504	187.711	190.421	192.888	15.6645	222.984	232.206	229.593	216.928	24.4696	333.595	350.34	321.005	344.769	55.2773	3371.36	3249	3191.53	3317.45	72.6603	7521.27	7472.01	7316.75	7137.51	109.478	8201.91	7934.21	15693.8	16753.7	176.393	43286.8	25303.7
18.5803	51450.4	26259.6	134035	26.9281	43914.3	25509.7	134510	2.83475	4670.01	3351.52	11671.4	3.11492	62.6396	66.6677	65.7689	61.1282	9.57139	257.235	257.276	247.173	250.539	17.4219	244.21	251.216	257.934	239.749	29.4524	397.318	393.906	425.677	401.741	44.3077	2714.54	2518.43	2663.92	2657.26	70.8297	7315.69	7047.89	6814.98	6912.22	127.102	9630.27	8871.59	17662.3	18025.8	162.976	40917	23938.7
8.72694	23769.1	12301.9	67619.1	39.8991	60988.2	35982.9	203658	2.20523	3404.84	2579.79	8891.61	2.54386	54.6886	50.0375	54.6313	53.9124	9.26129	247.581	255.967	257.505	259.392	15.7759	221.456	228.973	225.358	213.224	25.8306	353.39	369.188	356.028	355.567	44.2063	2627.24	2624.23	2640.7	2673.72	71.22	6801.72	7080.64	6950.99	7240.43	126.594	9363.92	9171.06	18435.8	17688.9	170.918	41773.2	25840.9
16.7271	47359.8	25447.5	121899	29.9957	47684	28156.7	147380	2.16312	3494.36	2631.21	9451.62	3.97058	77.311	79.0942	79.0768	79.9146	5.71691	159.575	148.785	147.767	158.008	11.2843	152.69	152.092	156.427	159.303	26.8488	355.503	386.181	371.392	357.158	53.4841	3302.83	3096.9	3337.38	3187.1	71.3488	7249.05	7202.9	6947.59	6820.69	107.124	8153.84	7833.58	15245.1	15830	195.62	48511	27919.6
17.1231	48109.3	25077.1	123637	16.869	26130.6	16530.8	83805	2.64254	4255.9	3198.97	10605.6	1.50515	32.3656	31.434	31.3972	29.7179	7.74499	198.982	213.644	215.974	202.8	14.9038	213.744	215.768	206.007	210.776	20.5803	274.918	293.754	271.878	295.347	38.5871	2346.61	2401.04	2415.03	2235.68	89.1743	9143.93	8560.98	8609.67	8805.77	124.295	8635.73	8802.24	18646	17402.3	193.268	48202.8	27110.7
19.363	52771.2	29474.3	147333	28.1628	44562.6	25696.8	138880	2.40653	4002.35	2789	10007.4	4.15876	85.2255	88.9827	87.1425	83.7549	8.50298	221.734	234.613	228.616	236.412	16.7844	226.412	247.371	237.209	245.17	20.4714	284.804	291.174	270.918	288.138	32.236	1900.43	2017.71	1927.62	1875.69	73.6595	7374.42	7569.51	7505.22	7224.21	114.391	8571.08	8129.99	17428.5	16591.5	155.057	37504.2	21833.7
15.0178	42498.8	20993.9	109672	18.9225	30898.5	18683	97213	2.24004	3697.51	2597.23	9099.72	4.27181	90.7705	84.9199	88.6344	88.9353	8.84125	247.415	231.181	230.346	246.659	13.4794	183.145	195.713	195.726	189.175	22.4102	312.734	313.026	317.472	298.989	31.9877	1959.5	1954.02	1990.94	1909.06	87.9862	8845.88	8367.35	8564.42	9039.56	138.096	9928.16	10045.3	20899.3	19642.4	194.208	48451.3	27019.7
16.7943	48774.7	24621.3	124906	25.5459	40509.3	23830.2	125873	2.21074	3380.4	2643.88	9058.07	4.59707	93.1256	95.3406	97.4729	94.1675	7.38168	208.226	201.964	196.422	207.409	13.684	202.108	186.132	196.395	184.665	22.6024	315.316	323.569	309.872	320.264	37.9087	2348.15	2316.98	2161.89	2303.97	94.4687	9782.22	9631.2	9692.16	9114.75	110.193	7709.04	7506.98	15903.1	15991.4	187.259	44389.8	28060.2
12.3681	36154	18615.4	96129.3	27.1454	42019.7	26223.7	129904	2.34383	3682.76	2630.76	9658.88	1.08753	23.2986	22.4496	22.3321	21.3507	8.85602	235.833	228.114	239.08	233.228	17.3646	234.109	236.394	251.481	253.362	20.4221	267.5	282.04	276.228	293.571	44.9178	2668.04	2720.8	2617.2	2712.24	63.8327	6225	6574.86	6457.14	6584.37	125.185	8677.29	8359.75	17664.5	18039.1	154.084	36982.1	21567.5
18.6731	54565.2	28458.1	140733	28.27	43222.5	26646.4	140483	2.86105	4354.47	3395.89	11797.7	2.87415	60.8482	58.8923	57.1623	60.1971	7.14774	201.195	196.856	185.876	194.332	19.6931	273.278	272.793	291.996	272.41	29.2347	405.313	393.182	404.476	417.84	48.3269	2966.65	2882.32	2771.3	2875.22	77.7142	7638.38	7912.88	7526.88	7505.66	110.69	8090.27	8068.94	16333	16200.9	153.023	37524.9	21510.1
16.7557	48390.5	23676.3	124535	16.2526	26057.5	14745.8	82724.7	2.39706	3957.9	2724.09	10247.1	1.8439	35.9612	36.8565	37.3224	39.1294	6.32496	177.431	165.285	171.878	164.721	15.058	209.535	220.695	223.112	216.905	27.8371	399.123	367.924	369.317	390.206	37.2183	2238.71	2253.92	2137.38	2199.68	69.5894	6901.88	7033.76	7172.23	6650.07	126.599	9641	9068.66	18034.3	18411.8	159.227	38091.7	23949.4
11.17	30757.7	15870.9	81936.7	10.5957	16520	9591.31	50344	2.67001	4265.5	3002.5	11715.5	4.21177	85.4395	87.1652	83.8993	90.2181	5.82282	161.893	151.966	156.587	153.053	13.4021	190.55	189.975	183.079	180.732	23.7464	337.835	326.499	327.514	312.477	32.0867	1909.64	1896.79	2013.15	1866.68	74.4444	7371.88	7503.78	7532.56	7261.91	131.186	9855.54	9137.28	19707.6	18918.6	172.743	41698.1	26284.3
9.16109	24426.7	13807.2	71029.7	11.1981	17821.7	10761.5	55382.5	2.44795	3694.77	2957.73	10366.3	2.21051	46.6107	45.4999	45.0766	43.6932	6.59923	177.62	173.002	174.102	171.862	10.5106	144.84	147.877	144.554	146.138	24.6292	343.095	349.66	343.833	328.096	49.2272	2919.89	2908.64	2914.97	3027.17	68.2129	6826.29	6785.44	6943.42	6793.54	138.165	10087.1	9620.87	20836	20137.2	182.605	44493.7	27769.8
11.3097	30441.9	17189.1	85519.9	30.1397	47663.5	29604.6	153078	2.80826	4234.8	3406	12011.1	3.14354	61.9069	64.0698	63.0462	63.5224	7.93785	219.125	219.915	219.133	215.254	17.8536	254.065	252.29	242.229	258.906	28.1127	406.523	377.942	403.578	383.592	38.8013	2320.76	2329.64	2243.08	2248.34	74.9541	7435.75	7156.61	7248.14	7493.82	114.221	8697.11	8054.22	16751.9	16513.7	184.756	44482	26825.9
15.4333	43517.7	22671.3	118719	32.3434	50498.3	31967	161704	2.0381	3162.59	2387.18	8660.66	1.44051	30.8255	28.7439	29.1914	30.3213	5.60866	151.952	145.128	148.958	147.101	18.0867	258.986	256.167	250.834	245.367	20.9698	277.99	275.301	276.093	293.213	58.8188	3342.01	3420.21	3589.03	3623.71	69.0694	6883.32	6900.01	6934.92	6994.06	103.951	7691.98	7163.18	15121.1	14908	170.73	42678	24790.7
7.15514	20415.3	10897.7	53017.4	29.7228	48496.3	27461.5	152829	2.23715	3377.19	2532.63	9301.6	1.44958	30.7071	30.2131	29.5556	28.752	7.89478	215.146	209.687	203.484	201.93	14.2148	200.35	200.969	200.649	196.389	25.3757	364.429	339.741	337.312	343.496	55.24	3398	3374.97	3137.15	3263.05	65.4253	6390.92	6464.22	6142.76	6246.36	143.955	10173.8	10239	21492.6	20222.9	155.816	40544	23047.7
19.4856	53213.3	28170.6	140683	22.966	36646.4	22430.8	111625	2.60176	4118.76	3010.14	11315.9	4.33995	92.4046	85.6111	91.8572	88.2292	6.32766	174.151	172.212	172.321	178.566	19.2729	284.066	281.051	259.019	279.49	21.3783	303.063	297.806	293.112	303.175	56.086	3461.55	3327.58	3263.26	3329.4	70.9184	6924.8	6854.79	6947.61	6928.8	115.637	8073.31	7709.01	17142.3	16839.3	179.768	46202.1	26206.6
10.9954	32252.7	16077.3	83882.4	38.4333	64230.9	36166.9	187298	2.69755	4176.77	3176.74	11155.9	3.32554	66.5063	71.1434	69.3894	66.7028	7.32178	187.273	189.561	198.416	188.064	13.2869	193.294	189.314	181.608	188.126	29.901	398.624	427.208	400.207	421.964	54.9854	3290.79	3445.55	3236.14	3300.3	70.4442	6806.45	6858.62	6912.44	6863.99	124.244	9136.61	8597.98	18367	18328.3	157.547	39738.4	22338.6
9.41641	26724.2	13130.1	69220.6	12.8961	19704.2	11623.7	66213.8	2.37055	3941.08	2683.59	10121.6	4.31155	92.6992	88.6187	86.4149	89.5095	5.709	154.173	151.639	146.961	155.316	11.733	162.96	165.496	160.467	165.993	28.7044	406.391	387.283	376.099	385.909	53.3318	3056.34	3088.86	3237	3177.21	96.8307	9917.53	9935.09	9749.79	9904.54	138.331	10543.5	9930.75	19844	20938.6	191.219	46676	27956.4
17.4566	46859.2	25629.8	129376	37.8825	59077.4	36657	176874	2.04826	3144.6	2366.71	8420.29	3.67039	75.3312	77.4702	75.3133	73.1858	8.15468	228.48	222.933	230.249	214.541	12.601	170.299	179.62	177.017	186.788	22.9797	327.851	302.829	302.497	304.19	48.4926	2808.76	2947.7	2841.87	2843.74	63.7752	6322.85	6301.55	6200.59	6160.22	131.604	9816.08	9072.47	18512.4	19733.1	189.42	49245.9	26697.3
11.0559	32017.6	16543.6	87108.4	31.4665	52766.6	28685.2	161807	2.66397	4289.26	3242.3	10842.8	3.9222	82.1354	84.2328	83.0695	81.1556	9.9389	259.754	280.634	279.822	266.306	11.2791	158.482	153.93	166.63	153.629	25.6442	350.515	336.323	365.564	365.801	45.4207	2697.93	2613.53	2732.97	2766.8	71.052	7069.35	6670.79	6834.73	6905.9	134.195	9519.63	9848.58	20338.5	19116.4	193.679	50300.1	27035.4
10.2415	29637.6	15686.6	73792.2	36.0035	59976.2	32233.1	174447	2.80942	4360.75	3296.25	11791.4	4.51336	95.8644	92.7991	92.3776	88.1981	6.2116	161.056	172.059	169.127	174.362	16.7052	227.238	231.278	247.212	237.372	25.5346	343.1	366.646	359.289	364.006	42.6821	2572.5	2540.01	2550.7	2503.75	98.7468	9455.6	9763.62	9655.58	9569.54	116.44	8092.81	7939.5	16813.8	17482.1	166.049	39995.6	24443.6
7.96154	23323.5	11941.3	58409	28.1476	44612.6	27206.4	140395	2.84774	4577.79	3220.75	11583.4	2.66464	53.7726	57.1707	52.058	56.0919	7.17726	187.321	200.387	190.323	201.548	16.8471	245.956	231.877	248.889	229.416	27.4774	395.864	395.091	380.176	362.473	44.4871	2728.36	2617.44	2550.98	2773.92	70.2589	6719.35	7140.42	6898.35	7072.18	148.991	10340.7	10667.8	22146.1	21103	192.241	49451.9	27524.1
11.2841	31162	16640.1	87359.1	37.4235	57994.5	35846	188342	2.60639	4082.5	3213.45	11006	3.50564	68.2221	70.656	73.4688	74.1434	7.2709	203.141	205.307	203.738	188.743	19.8891	276.01	270.029	289.954	273.129	26.7289	369.634	359.402	383.237	359.861	36.4764	2158.34	2197.73	2276.1	2226.2	72.9414	7509.84	7555.59	7516.86	6972.9	130.958	9583.17	9476.87	19994.5	20031.6	184.839	44549.2	27054
16.221	45926.9	24761.7	124207	17.8244	27289.2	17539.9	89790.9	2.51887	4022.4	3102	10553.7	1.32758	25.9875	28.0255	27.6153	27.6497	9.90061	276.254	279.207	267.113	253.67	19.45	261.38	261.762	276.81	275.998	24.1948	331.694	321.885	330.007	348.372	52.4366	3108.34	3266.15	3123.44	3080.65	73.5634	7603.21	7293.57	6952.94	7136.7	125.445	8708.16	8542.35	17864.2	17803.1	162.315	41415.8	22723.7
9.45343	26724.9	13903.1	69614.8	31.5746	48608.2	28476.1	148758	2.19523	3386.77	2649.43	9441.45	2.86295	56.4284	58.6458	58.0369	61.117	9.13708	244.694	257.485	238.636	241.469	10.9529	150.693	158.079	151.662	148.186	24.2545	349.266	339.999	318.185	320.221	58.3115	3486.57	3520.27	3403.78	3341.62	93.4058	9207.19	9058.14	9205.78	9106.44	118.305	8997.96	8131.51	17261.4	17861.8	189.623	47342.9	26878.6
7.9644	22457.5	11276.2	61600.8	14.2208	21975.8	14000.5	67755.9	2.36118	3737.47	2714.57	10169.2	4.04289	81.3704	85.3655	84.3139	80.5656	9.62173	270.256	266.668	261.774	258.472	17.363	253.904	242.535	253.624	244.918	28.875	405.453	405.735	385.875	393.146	47.6236	2784.44	2914.23	2833.18	2907.11	81.2343	7914.88	8294.73	7830.24	8374.55	100.937	7699.74	7390.59	14440.5	15457.8	165.601	41363.6	24899.9
10.686	28719.3	16423.7	82164.4	17.7669	27386	16024.9	90579.8	2.39699	3934.43	2820.01	10023.5	2.82859	56.2799	56.4198	58.5325	55.5687	9.97976	261.547	273.335	257.151	275.015	15.7035	219.004	222.568	212.539	231.152	26.003	358.887	349.478	374.84	368.935	52.1744	3169.43	3116.72	3255.55	3155.86	83.3218	7954.46	8334.47	8061.13	8460.23	120.854	9073.52	8610.88	17002.4	16824.2	152.618	36559.8	21581.2
16.8484	45272.2	23499.5	123144	36.4134	56078.2	32994.3	170736	2.7551	4507.04	3096.89	11107.6	4.50423	87.919	91.7674	96.5375	93.5605	8.67241	242.398	241.996	243.351	222.368	19.3221	267.358	275.466	277.787	285.817	23.3207	309.355	335.681	334.494	310.943	56.8062	3354.74	3446.97	3246.35	3259.63	72.2684	7486.7	7175.84	7061.58	7304.84	116.035	8325.4	8082.7	16528.4	16909.8	166.966	40195.7	25565.8
14.9554	41538.4	20859.2	114420	18.4929	31067.4	17284.2	89443.8	2.43307	4042.81	2941.76	10548.6	2.73104	54.9899	58.5065	55.572	58.3937	5.93059	151.724	166.144	154.611	160.868	13.928	191.687	191.333	188.68	197.16	24.9487	326.804	332.861	360.313	357.302	39.7704	2384.59	2377.02	2292.13	2458.17	63.7541	6423.41	6115.71	6142.48	6194.52	118.58	8401.15	8672.39	17550.5	16565.9	151.44	39082.8	22200.2
11.3745	31759.6	16251.5	81835.2	16.7123	26644.1	16384.2	83230.7	2.34101	3578.48	2645.19	9634.88	4.87613	95.3796	96.2812	102.166	101.874	9.83815	255.095	273.891	252.34	277.541	17.7138	252.635	246.823	253.832	257.012	23.0608	317.425	328.516	304.151	303.334	55.7673	3190.96	3335.95	3375.21	3371.72	62.0536	5950.11	5968.01	6340.64	6138.97	139.077	10132.5	9909.75	20036.2	20938.1	163.671	40316.9	23975.5
12.1625	32414.2	17242	89789.2	10.3783	17388.3	10131.4	51648.3	2.37455	3703.38	2703.16	10122.5	2.52042	52.554	51.1379	51.7179	53.9128	5.64435	148.505	155.176	148.843	144.865	13.1436	190.251	187.101	190.038	194.229	23.3105	335.838	317.456	323.944	330.39	42.9555	2504.46	2556.74	2487.6	2632.24	96.2073	9489.94	9121.83	9391.28	9242.71	136.085	9754.47	9475.46	19565.3	19353.3	186.385	47612.5	26746.8
6.79537	19768.2	9608.58	50837.3	13.9312	23373.1	13766.6	70702.2	2.88071	4593.62	3242.93	11899.9	4.23753	88.9601	84.8665	88.5544	86.4129	8.06592	211.573	208.934	222.183	224.686	17.2885	247.368	252.467	241.552	255.952	22.1911	301.399	296.698	314.502	297.88	44.6781	2734.26	2632.94	2745.03	2730.89	89.9337	8616.04	8761.67	9176.02	9310.66	138.872	9707.62	9794.5	21226.8	20318.2	166.047	40732.9	23942.6
17.0199	45969.9	23845.7	123382	28.9361	44353	27682.6	148767	2.07889	3173.23	2511.04	8664.15	4.637	92.6268	96.9427	95.4891	97.8664	6.37861	166.197	174.388	171.998	175.46	19.327	264.263	277.454	280.643	272.874	20.5776	293.627	289.215	277.83	285.281	51.1306	3060.72	3020.86	2973.51	3099.38	96.0956	9821.17	9317.22	9903.26	9875.57	123.688	8915.46	8791.71	18271	17315.4	183.525	47154.7	27546.8
5.87497	17029.8	8555.45	44382.7	15.4357	25249.8	14893.5	77272.3	2.29112	3746.34	2564.59	9925.74	3.66057	72.9681	75.3742	74.5878	77.0859	6.99922	180.112	196.095	192.934	195.137	18.0601	248.045	244.081	263.339	265.606	27.6527	379.17	379.032	382.806	399.755	31.1563	1782.54	1912.14	1781.78	1930.82	61.0895	6095.97	6271.62	5991.14	5759.54	104.221	7354.34	7328.22	14988.8	14975.6	198.263	50381.9	27870.6
12.4335	34085.4	18580.1	98148.8	26.4926	41604.7	24152.3	130550	2.77662	4541.21	3234.07	11821	1.39403	27.8931	27.4267	27.4557	27.9994	7.29147	188.218	188.434	189.03	194.408	18.1111	259.794	259.934	254	247.612	22.8581	327.457	325.694	302.46	312.025	34.1656	1996.24	2049.31	2125.53	2099.41	98.751	9300.42	9345.78	9935.84	9429.86	146.423	10328.6	10747.9	20756.4	22254	153.017	37156.9	23376.4
13.7412	36725.3	19612.8	104166	25.6303	40122.5	23175.9	128466	2.70205	4150.16	3253.45	11513.6	2.22435	46.0412	43.6566	44.0956	45.0658	8.79898	238.926	245.101	235.57	242.455	16.6977	230.807	225.044	243.208	224.645	27.8391	380.429	391.29	367.416	371.567	51.5566	3008.87	3079.31	3218.59	2952.54	80.6125	7833.92	7885.84	7857.18	7963.75	142.267	9988.02	9843.63	20847.9	19944.1	172.499	43531	26392.6
6.94498	19551	10316.2	52822	15.0349	23632.9	13563	71939.3	2.7756	4388.65	3279.28	12187.1	3.03161	61.6556	60.2481	60.995	62.6874	9.81694	262.91	273.693	260.531	268.08	15.8837	215.766	232.009	216.792	225.914	29.1602	398.289	397.213	401.827	390.868	41.224	2547.12	2443.97	2502.26	2539.03	90.896	9368.32	8533.55	9360.41	9276.66	145.74	10955.2	10575.2	20342.4	21255.9	192.498	47481.8	28811.1
17.6365	50233.2	25261.3	126191	23.8767	37237.4	23179.3	116551	2.76361	4185.69	3296.87	11910.9	4.9296	103.257	105.92	104.653	97.7282	5.9443	159.629	155.559	158.029	157.839	18.8209	274.606	269.321	262.099	275.668	24.8451	328.158	357.748	341.777	358.614	39.1845	2336.79	2369.14	2428.61	2305.25	75.5313	7684.14	7226.46	7130.49	7450.31	102.161	7298.83	6993.2	14209.3	14258.4	184.083	47555.9	27820.6
17.6438	49879.8	25351.8	131671	29.1875	45225	26850.6	144336	2.55551	3961.82	3063.28	10441.9	4.78989	96.3475	98.5001	102.351	95.2947	9.93084	266.635	262.237	258.149	271.402	17.0561	244.085	238.512	235.991	239.023	25.4513	341.95	356.578	359.833	341.062	30.9037	1783.41	1928.69	1815.43	1829.61	78.9394	7480.09	7644.62	7621.47	8036.31	108.498	7982.68	7879.8	15925.9	15673.1	168.878	39879	25644
17.5549	50162.6	26728.7	127263	31.7071	49509.3	28644.4	159134	2.88789	4485.82	3464.29	12212.9	3.55877	69.2621	71.4885	75.6052	76.0377	7.50286	199.913	208.711	198.68	209.374	11.9885	172.353	164.5	173.983	174.484	25.954	365.379	356.653	354.457	352.856	52.5751	3052.8	3015.19	3233.24	3226.82	67.5237	6803.03	6843.21	6559.84	6700.76	112.667	8201.12	7784.35	16674.7	17008.1	190.462	48722.9	26540
13.419	36364.2	19805.1	103278	33.6718	53156.4	32808.7	170471	2.28468	3656.62	2621.21	9666.2	1.90699	38.0588	37.4974	39.8192	37.7632	8.71869	232.136	226.865	246.123	228.328	17.4457	248.325	250.799	235.75	243.565	20.9723	291.502	288.27	302.516	300.066	50.422	2982.99	2920.83	2969.61	2990.09	94.8652	9418.18	9269.09	9791.38	9462.9	117.358	8362.25	8147.64	17903.9	17613.6	150.695	36195.5	21281.5
6.87851	19703.4	10295.7	53618.4	38.822	64121	35422.1	197953	2.54397	3854.51	3097.92	10975.5	3.50627	73.8862	72.877	70.5976	74.7765	8.69434	242.753	227.834	243.087	227.537	13.5	192.6	187.779	196.444	192.782	28.345	372.533	391.149	389.919	384.282	41.5599	2476.25	2552.07	2510.05	2519.74	94.9119	9516.13	9119.7	9076.06	9518.67	117.964	8899.03	8028.03	17026.9	17586.8	184.529	47928.7	26686.3
10.0943	28028.3	14145.1	79407.2	33.5227	53912.6	32163.3	166387	2.54945	4040.67	2865.83	10318.4	4.3581	91.3986	88.3485	90.6345	86.0067	7.44655	194.313	203.359	192.404	192.947	13.2169	180.585	186.711	188.634	188.233	24.9581	344.737	346.457	336.041	340.837	48.3041	2932.68	2854.87	2775.01	2954.29	86.216	8746.67	8703.4	8176.47	8483.92	134.959	9770.9	9344.13	18856	20551.9	171.756	42663.9	25356.2
17.1466	46555.8	25428.3	131772	38.4365	59724	35371.4	186998	2.40161	3859.93	2944.88	9797.33	1.77165	37.9201	35.0223	34.5602	35.3135	9.29884	254.912	240.271	242.396	252.095	13.5243	195.259	196.388	182.704	185.457	21.6199	310.821	312.528	296.821	296.654	51.2038	3139.56	3085.81	3100.57	3076	88.7998	8614.94	8882.67	8972	8384.38	107.596	7802.05	7904.55	16517.8	15935.6	183.924	46611.4	27053
12.6353	35946.3	19401.7	96236.8	22.272	36155	20781.2	114098	2.70128	4348.46	3198.25	11812.9	1.53527	31.0827	32.2956	30.9487	29.9535	5.09036	131.645	137.063	137.172	130.398	19.5668	271.791	278.284	280.13	285.566	22.9223	312.417	324.95	306.975	305.608	45.854	2860.24	2654.68	2633.02	2876.79	71.2027	6693.83	7281.93	6884.46	7364.08	103.556	7619.25	6936.04	14793.1	15664.9	176.135	41682.9	25533.6
8.6571	24814.4	13264.4	67237.4	28.1614	45188.4	26864.5	145163	2.0611	3409.75	2514.61	8958.78	2.0514	43.0107	43.9998	41.8948	41.684	9.75917	263.967	268.966	262.438	262.862	13.2838	192.234	189.778	196.697	179.875	24.2347	319.061	326.531	343.517	338.806	32.1207	1964.46	1857.38	1935.41	1898.27	82.277	8425.9	7745.15	8424.98	8446.59	128.64	9131.67	8679.51	18635.9	19643.3	194.716	48148	28065.4
11.2178	32802	16233	84890.7	38.9285	62805.6	37289	187427	2.27551	3637.29	2614.79	9480.2	3.64112	74.5138	74.7928	73.5875	70.9053	8.71969	225.45	235.264	234.734	238.245	12.324	176.43	178.821	167.79	182.169	21.7296	310.861	308.281	302.437	303.998	54.687	3109.51	3338.3	3395.81	3143.89	82.937	7853.06	7821.15	8061.16	8095.08	115.299	8521.12	7997.01	17115.5	17449.7	166.828	42721.4	24094.8
15.4875	42567.3	21946.8	118432	36.7204	57711.2	35850	175927	2.05882	3314.55	2346.1	8535.07	1.32778	26.1904	27.0815	28.542	26.7217	8.27874	219.582	227.099	227.434	227.3	10.7307	155.014	154.491	146.438	155.971	23.2866	332.759	306.522	317.658	328.194	30.1222	1818.68	1870.37	1883.11	1877.82	81.2499	7996.32	7967.15	8311.36	7884.09	110.405	8220.43	7394.93	15753.7	15519.2	183.908	44795.7	26373.7
16.7236	45814.3	24216.1	125973	15.2488	23829.5	13650.2	76852.7	2.75359	4410.02	3119.9	11703.6	3.95192	83.7327	82.4829	79.4864	80.2535	5.7603	153.607	148.828	150.881	157.55	16.8468	248.565	235.64	237.235	242.598	22.5537	296.564	306.826	325.854	318.592	55.3955	3443.3	3277.28	3182.31	3203.69	75.1291	7264.07	7194.32	7526.1	7426.83	141.603	10610.2	9546.28	20420.1	20518	162.878	40812.7	23148.5
11.0299	32319.7	16073.8	86992.9	36.4503	56079.2	33215.2	178696	2.43935	3763.3	2896.43	9836.27	4.94286	105.335	98.4718	106.119	105.602	7.24371	190.624	199.765	185.955	194.792	14.8089	202.747	205.444	202.447	211.264	21.0214	287.709	298.231	293.457	297.75	39.4444	2402.86	2452.14	2282.5	2381.47	76.9466	7821.12	7240.82	7914.87	7751.57	142.531	10013.9	10413.4	20404.1	21377.2	167.095	42769.4	25576.4
5.67471	15377.6	8408.55	44349.7	25.1672	40879	24684.3	125498	2.29316	3635.6	2615.77	9289.48	2.81087	59.9046	56.5991	54.9013	54.8707	5.70566	155.183	149.716	152.082	156.064	17.557	246.784	236.338	257.302	243.373	25.4739	336.128	346.394	348.108	365.935	54.3389	3170.98	3154.66	3094.26	3103.36	83.0238	7869.87	8232.73	8442.43	8125.01	139.784	10541.8	9843.37	20513.9	19548.7	174.428	45215	26380.1
11.7117	31620.3	17040.5	89140.9	35.5694	58345	32845.3	173345	2.51953	3816.37	2917.99	10614.4	1.25769	26.3362	25.6087	26.4779	25.3449	9.69929	272.353	251.152	269.176	262.451	11.9884	174.267	174.681	173.086	172.889	22.3813	317.43	319.958	304.765	301.334	55.0527	3218.39	3453.98	3305.89	3178.81	91.4502	8681.34	8933.38	8836.44	8712.19	123.894	9056.04	9059.62	18088.9	17237.9	192.199	49490	28150.8
5.02837	14697.9	7305.79	36439.5	22.7215	35371.2	21151.7	109269	2.90502	4700.52	3424.53	12156	3.20079	66.8009	63.0798	66.9884	62.3252	5.06236	137.774	132.435	138.909	141.978	12.7767	173.401	185.321	187.456	189.345	21.3809	283.769	295.085	289.44	292.477	48.3328	2797.54	2974.05	2931.65	2826.18	74.5673	7646.34	7058.25	7560.04	7195.55	132.397	10100.2	8904.05	19183.2	19685.6	190.983	48458.2	27223
6.0356	17423.7	8446.55	43800.6	39.8132	61382.8	36462	190212	2.85914	4604.94	3210.95	11890.8	3.02505	59.8694	64.3458	60.7538	62.1081	5.76903	148.443	158.77	150.38	160.469	16.3723	243.016	226.132	241.957	226.483	28.4275	388.698	389.403	391.395	402.608	56.9581	3500.69	3571.03	3445.84	3382.43	92.7762	8787.49	8769.83	9491.21	9286.69	104.749	7640.35	7584.42	14783.3	14902.9	184.7	46054.9	27218.5
12.3199	33972.3	17863	97076.1	33.6593	54431.9	32515	164325	2.11377	3394.02	2510.44	9344.96	4.289	84.2757	87.8155	88.0027	83.9101	7.81659	201.146	204.919	213.113	215.427	11.8358	159.005	164.335	172.146	159.951	21.2675	299.716	291	298.538	306.56	51.3661	3060.08	3158.87	3024.98	3011.33	92.396	9009.07	9318.87	9456.61	8918.53	143.847	10680.6	10035.9	20726	21522.9	156.187	37935	22819.8
6.98827	19113.7	10106.6	50757.1	30.2414	46350.6	27244.3	150323	2.336	3872.09	2643.68	9608.45	1.21527	25.119	24.8646	25.4476	26.1369	9.47157	260.272	243.746	244.532	249.291	14.4381	200.791	198.786	210.983	204.171	29.6633	417.551	401.652	419.069	413.56	48.5502	2773.46	2773.54	3034.6	2772.24	61.8358	6375.97	6295.83	6274.39	5996.81	114.928	8145.32	8029.74	16177.1	17478.9	167.049	41911.9	24900
9.58765	27730.5	13897.4	71676.1	34.0798	52205.9	31802.4	160433	2.3762	3815.29	2884.53	9666.32	2.59438	51.0186	55.4012	55.0362	54.2886	8.42468	221.375	224.534	222.611	225.431	10.4883	145.188	143.919	147.764	145.48	29.9331	423.982	421.031	403.497	416.599	35.6576	2053.32	2213.41	2109.13	2167.66	96.4493	9641.31	9582.5	9266.59	9282.95	139.855	10571.5	9335.7	19793.9	20716	178.255	42189.8	25773.1
5.02455	14249	7268.55	39264.8	35.2177	58753.6	33024.1	172423	2.55864	4042.65	2889.86	10857.1	1.45648	28.3958	31.1784	29.6803	29.2769	8.55084	227.521	233.977	239.92	232.6	11.275	157.581	164.111	160.543	152.211	22.6419	324.005	300.162	312.716	322.299	30.3473	1845.07	1819.79	1740.02	1757.62	95.4378	9613.33	9089.54	9520.29	9023.61	123.594	8826.01	8710.68	17674.8	17265.1	178.595	43501.5	25701.4
8.39484	24335.6	12166.6	65259.9	35.3133	57530.3	31720.2	174607	2.42042	3781.44	2956.36	10074	1.66688	33.4365	33.5213	34.8609	33.9792	9.78528	257.906	262.934	268.42	253.752	12.5774	177.987	183.855	172.848	186.248	24.2854	333.788	333.731	345.743	333.76	58.7777	3681.14	3601.37	3609.61	3542.16	81.8834	7923.81	7834.77	8377.59	8368.92	146.069	10905.8	10060	20847.8	21475.4	156.669	40163.7	24005
14.1199	37991.1	20972.1	111415	25.5016	42457.7	24372.7	123224	2.22185	3394.39	2519.69	9545.45	4.20756	86.1281	84.7625	83.4944	90.1152	7.30163	201.339	192.881	188.044	190.84	19.1275	272.841	279.005	275.748	272.345	28.6856	411.331	379.007	383.065	403.402	41.6421	2428.71	2528.52	2468.21	2500.67	71.1077	7152.08	7271.63	7278.49	7209.24	135.136	9615.85	9636.8	18898.8	19573.7	184.121	46233	28188.1
8.09434	23668.6	11737.1	62816.3	30.7237	49664.3	29926.1	151390	2.25952	3732.12	2639.96	9944.08	1.3882	28.5006	27.6557	27.1327	28.6825	9.29084	252.33	248.505	241.137	248.519	10.1959	143.219	150.531	151.263	141.59	21.1999	284.361	304.19	304.205	297.135	41.2877	2365.34	2511.3	2453.83	2446.44	71.1345	6841.19	7246.55	6934.08	7228.86	104.361	7698.05	6979.18	14992.9	14795.6	198.054	50695.5	29356.8
18.1514	50973.7	26471.4	135889	39.0009	61982.3	38289	198972	2.49894	4065.9	2984.14	10302.2	1.25617	25.911	26.0077	26.6904	26.2187	5.9061	163.731	154.682	164.351	159.27	11.8239	164.819	173.508	174.127	174.188	29.6382	417.192	404.863	418.439	392.69	50.7142	3094.77	3134.1	2899.52	3090.69	68.3126	6902.12	6809.22	6599.24	6747.3	146.392	10952.5	10364.8	21475.8	21078.7	156.493	37940.7	23216
19.4858	55024.7	27245.7	148454	12.0807	18950.6	11743.8	56595.3	2.28022	3762.63	2752.16	10064.4	1.53223	31.487	31.6338	30.1156	32.6299	6.58816	173.366	178.991	179.54	181.147	16.1783	231.11	228.693	239.416	218.54	29.465	412.543	387.231	420.17	406.755	43.5124	2686.08	2655.94	2708.04	2716.82	95.14	8972.61	9491.65	9535.96	9551.59	104.843	7345.24	7228.93	14826.1	14644.2	169.845	43358.7	23984
5.89933	16475.1	8325.44	46021.9	26.5566	40661.8	25825.9	127152	2.44509	3703.89	2893.07	10066.2	4.65705	94.9199	93.204	93.983	98.8962	6.67389	186.907	182.295	184.465	187.881	15.6538	230.774	211.644	226.274	224.336	22.6014	307.571	316.902	301.404	323.157	55.3787	3250.68	3337.01	3449.84	3213.36	96.3847	9854.99	9071.28	9928.86	9589.02	145.576	10605.9	10550.6	21362.5	20624.7	187.518	48592.2	27604.5
7.12706	19163.5	10672.7	55727.7	20.4758	33557.4	18496.2	101549	2.71523	4101.24	3280.27	11379.7	2.23639	47.7685	46.6165	43.68	44.5525	7.79587	208.458	209.82	205.289	210.106	17.1964	231.328	235.051	249.57	234.68	21.9286	307.156	289.254	289.068	315.577	55.0477	3430.51	3379.64	3297.65	3422.9	65.4129	6211.65	6731.55	6252.97	6769.19	122.693	8592.4	8488.97	18049	17996.9	181.871	43562.6	26060.7
5.29922	14603.2	7561.12	41136.1	17.5502	27798	17096.5	83739.8	2.23246	3448.65	2636.8	9112.31	4.02538	83.3172	85.2093	84.9455	84.7994	9.84447	274.784	254.456	252.908	258.689	13.4978	182.993	184.521	185.988	196.671	29.1103	418.456	388.395	416.896	415.097	30.3012	1817.54	1720.78	1876.56	1883.94	96.6651	9972.78	9092.7	9890.45	9498.43	144.235	10568.8	10277.4	20568.5	20049.3	159.195	39404.6	22332.4
12.219	35503.3	18510.4	93943.4	24.9759	41686.2	22408.2	126468	2.32865	3614.12	2702.74	9881.17	1.56417	31.204	31.4745	32.8317	33.1738	8.51547	221.754	233.287	232.903	227.831	15.9926	225.791	221.762	215.448	222.448	22.9605	319.705	311.841	326.247	315.318	44.6954	2715.39	2673.36	2752.78	2796.48	96.309	9270.8	9518.86	9483.74	9977.69	115.233	8054.26	8282.18	16618.1	16683.2	175.992	41806.4	26019.2
8.93117	25788.9	13327.9	69288	12.7957	19495.2	11916.5	65037.9	2.41484	3654.54	2766.61	10672.8	4.70331	92.8585	98.3937	96.0125	92.6516	9.54935	264.527	263.25	248.155	268.589	18.3903	267.238	262.491	263.512	256.614	24.4437	326.689	334.823	342.795	334.576	58.3766	3529.39	3470.29	3356.87	3600.93	84.9598	8541.49	8028.52	8355.88	8253.99	123.669	8567.98	8994.5	18315.9	18269.5	185.348	43979.1	28426.5
17.8019	47468	25608	127556	23.6636	37181.3	21746.4	110459	2.37463	3876.43	2778.72	9668.58	3.0031	60.7677	64.2562	59.2245	61.9265	6.52559	180.637	178.215	167.968	169.57	14.2925	201.587	202.209	204.875	202.171	23.1636	304.48	310.986	322.631	309.055	39.2903	2405.46	2406.86	2408.49	2293.87	85.3927	8198.06	8487.93	8815.62	8442.78	108.39	8270.22	7448.42	15748.2	15353.8	165.542	39941.9	23406.2
8.20825	23856.7	11493.6	64480.7	16.0905	26544	14415.4	80173	2.7871	4594.62	3376.59	11182.8	3.89385	79.8491	80.2202	78.4657	75.8664	6.76527	174.038	174.662	188.456	174.189	18.6675	268.394	258.287	253.102	275.861	25.4286	351.258	367.43	351.083	366.694	33.334	2070.32	1967.88	2071.35	1925.02	74.2693	7162.4	7581.12	7559.45	7273.12	112.197	8233.95	7535.17	16447.7	17202.4	185.239	45142.9	28157.4
13.3741	38720.5	19492	104827	38.5874	63680.4	34989.2	198084	2.45137	3998.61	2793.26	10671.1	2.92832	61.7204	57.799	59.1017	60.3574	9.90478	260.048	253.565	275.935	268.494	16.8678	231.246	240.69	227.897	240.749	25.0171	352.289	330.908	343.188	360.918	50.1022	3090.28	2937.98	3005.21	2903.02	97.7354	10081.4	9892.92	9767.96	9174.15	142.765	10399.6	10388.1	21191.8	19891.7	197.351	50093.6	27848.2
7.55211	21980	10641	54762	38.7367	60610.8	37907.1	194197	2.72081	4363.11	3317.9	11129.6	1.45816	28.7526	28.8957	30.1167	30.2198	6.51716	175.102	171.744	181.946	167.869	10.0535	145.077	140.67	137.28	146.459	21.629	301.617	295.015	302.325	301.309	51.3855	2999.82	3082.64	3105.61	3025.47	62.8546	6316.69	6516.68	6052.08	6197.38	137.178	10072.4	9362.11	20680.9	20336.1	187.928	48696.7	27449.3
11.3807	32455.3	16057.7	82050.1	25.4112	40590.5	24357.2	118588	2.35738	3622.69	2814.43	10124.6	4.96426	98.5821	102.539	99.4593	105.968	5.71162	147.448	158.098	153.361	158.382	19.4535	285.534	288.472	274.385	275.711	22.9055	306.158	329.251	319.45	325.641	49.9488	2849.93	3048.76	2910.39	3114.14	88.8702	8940.34	8813.68	9149.69	8449.42	142.926	10339.6	9863.79	20193.4	21324.6	170.661	40646.4	24912.8
12.3946	33046.2	17451.4	91894.8	15.5387	24991.3	14153.3	74032.7	2.86054	4618.39	3440.98	11993	4.35988	87.5246	85.9139	87.1947	91.4003	9.34695	248.716	262.679	260.533	249.551	17.542	247.621	236.276	250.324	248.465	21.5108	288.379	287.732	288.361	293.926	53.5158	3085.43	3346.89	3077.33	3171.91	74.8497	7173.11	7220.29	7073.12	7682.47	129.861	9308.42	8696.18	18324.9	18884.4	195.753	47674.1	28384
18.8337	55200.4	27160.4	141958	26.456	43980.9	23857.4	129559	2.67273	4421.11	3254.79	11841.3	4.40718	88.8949	92.4809	94.3382	87.5067	9.80269	257.268	251.923	270.915	251.568	10.9185	161.317	153.925	159.504	157.798	26.153	371.717	376.499	350.681	363.879	49.1221	2791.62	2944.39	2978.63	2867.92	96.5959	9742.09	9882.09	9272	9822.45	141.009	10052.1	9979.47	21264	21617.5	157.843	37620.5	24163.1
6.53934	17797.3	9381.41	50990.7	18.18	28242	17590	86138.6	2.54902	4194.02	2900.92	10513	3.92563	84.4016	81.2753	80.5861	82.1529	5.00758	133.478	140.814	138.936	134.916	18.7454	267.497	265.888	275.295	267.246	22.4379	300.958	301.092	316.565	323.465	47.0399	2681.62	2823.34	2950.3	2706.47	74.5356	7391.53	7330.8	7207.9	7445.96	102.048	7140.24	7022.95	15151.5	15094.1	177.518	43408.4	24933.5
8.63728	23638.5	12819.4	67523	35.3284	58976.4	34835.4	166226	2.66017	4163.92	3152.84	11407.5	3.66156	78.123	77.8326	76.4542	77.0385	7.50276	196.694	192.976	194.902	196.843	17.7194	250.834	241.474	250.353	250.034	29.6731	426.257	395.552	420.13	393.756	45.2431	2832.85	2718.53	2808.6	2745.12	76.2169	7252.12	7395.75	7184.83	7817.38	123.013	8965.12	8775.95	18019.6	18228.4	167.518	41427.9	24169
14.3615	41549.8	20804	102796	37.5355	61959.4	34995.1	180767	2.10286	3472.02	2379.67	8895.88	1.95256	38.7941	41.2657	40.5629	39.1893	8.9142	246.4	228.276	243.678	240.411	16.8481	247.158	236.652	246.544	248.522	20.1986	267.777	266.967	282.963	264.623	55.5426	3436.4	3451.54	3475.25	3159.55	92.797	9314.22	8977.07	9221.66	8798.67	137.459	10064.1	9762.88	20195.4	19664.7	153.104	37338.4	21613.9
11.5587	31990.2	16967.2	87588.1	13.0257	21585.8	11805.9	61227.6	2.83259	4458.25	3491.26	12545	4.38945	93.7438	94.083	86.619	87.7098	9.22424	258.317	242.192	246.559	236.75	18.0333	265.626	264.74	248.267	260.492	23.6796	336.358	334.78	335.935	336.57	39.6312	2398.4	2367.55	2469.5	2309.52	83.5751	8343.24	8127.81	8275.34	8025.97	117.868	8647.45	8364.95	18060.9	17256.6	169.115	41255.7	25809.2
10.589	30613.1	15317	76807.6	11.9543	18785.7	11550.2	58285.3	2.62374	4092.2	3032.63	10625.4	4.10228	82.2661	85.7769	80.2635	82.2742	9.51547	266.274	261.628	253.52	262.133	18.3861	248.872	257.569	256.144	261.042	24.5532	349.543	348.576	326.995	331.159	31.4011	1808.43	1832.29	1823.3	1878.54	71.0212	6985.69	7004.03	7106.02	6758.81	101.241	7409.54	7204.39	14735.8	15366.6	176.014	44142.6	24985.5
17.4915	47969.3	25866.4	129771	23.4667	39355.9	21566.7	111053	2.49075	3851.35	2856.72	10597.9	2.83772	60.5017	59.0635	60.6207	60.3987	7.03916	188.16	181.096	187.149	183.589	11.5575	165.205	162.248	168.402	168.357	28.5429	383.778	397.59	384.35	400.837	40.1827	2357.52	2484.54	2295.95	2374.99	92.3653	8683.67	8740.69	8708.6	8839.64	139.972	9687.86	10019.2	19911	20182.1	178.605	43801.9	25798.3
11.3044	31808.6	17009.7	87490.3	10.2614	16171.7	9739.91	49952	2.29865	3808.34	2643.97	9521	3.09644	62.642	64.9961	62.7491	65.4641	6.08678	158.575	162.041	155.924	156.154	16.9238	242.896	232.289	234.109	250.204	26.9329	362.169	365.254	384.143	362.912	58.7841	3399.73	3356.8	3646.21	3666.47	77.3959	7435.68	7760.89	7626.31	7327.35	148.661	10429.5	10172.1	21028	20886.8	178.403	44539.6	26462
16.2281	44350.2	24192.5	122342	23.9432	38746.6	22146.1	120544	2.06756	3165.87	2506.17	8352.11	2.71289	55.2099	53.359	56.4732	56.582	9.50679	265.453	250.904	244.903	250.306	12.7538	176.885	182.39	174.439	173.218	26.8197	373.211	351.672	358.36	356.942	34.8997	2021.72	1999.2	2038.73	2025.89	70.4841	6704.81	6641.35	7002.7	6987.64	118.753	8538.11	7909.65	17957.1	17402.6	159.736	39690.8	24187.3
12.8669	34687.2	19139.1	95609.1	34.6162	56949.7	31984.3	163595	2.31597	3767.47	2692.78	9675.46	2.13272	45.2952	44.6923	42.1446	45.0084	5.16847	135.624	134.288	136.244	133.042	16.2709	240.19	234.344	236.708	236.413	29.6548	427.341	421.985	426.404	422.616	43.31	2563.23	2459.51	2640.51	2578.57	84.0343	8334.35	7979.58	8484.57	8686.9	100.217	7263.71	7304.54	15382.4	14813	158.053	39932.1	23798.2
19.7857	57689.4	27825.7	149336	15.7767	24345.2	15312.3	77990.1	2.93145	4708.42	3343.39	12240.6	3.14191	63.183	64.6612	63.7863	66.807	6.28763	161.425	176.658	167.14	172.444	10.0726	143.804	135.601	149.394	147.651	20.4513	287.51	275.991	288.142	294.269	57.5071	3301.71	3366.8	3435.31	3489.61	69.3629	6628.68	7154.37	6621.84	7166.81	106.67	7532.9	7544.99	15095.9	16351.7	153.693	38296.4	23436.3
8.25523	23443.8	11616.3	61597.7	14.7559	24375.2	13554.3	71000	2.10606	3175.58	2518.93	9005.3	4.11767	87.3989	88.2996	80.3848	86.9174	9.81983	266.947	264.989	275.497	266.585	10.7626	150.978	156.028	150.911	155.861	26.2151	369.353	373.906	373.658	347.131	53.7816	3102.09	3203.43	3316.51	3242.26	90.2477	8868.16	8594.86	8938.45	9283.73	128.922	9531.23	9013.4	19405	19357.9	168.571	39992.9	25714.2
19.0861	53201.4	27909.7	143727	14.322	24038.4	13608.7	72262.9	2.24934	3697.09	2549.57	9026.05	2.27638	46.591	46.8191	46.6685	46.7072	6.06216	168.9	163.681	157.325	167.041	15.361	207.613	218.856	223.96	219.268	20.2006	289.316	290.949	270.368	278.517	43.469	2599.14	2616.48	2472.36	2708.74	84.3193	8093.25	7930.88	8282.12	8645.03	140.634	9955.86	9526.69	20635.1	19996.8	157.179	40079.4	23419.3
17.2886	47648.7	24817.8	131737	24.1709	37411.2	22477.9	115887	2.11581	3442.65	2563.45	9169.68	4.70461	94.1142	100.899	93.54	92.0577	9.26898	254.902	258.594	247.602	255.595	10.9174	156.61	157.395	157.802	150.915	21.4812	307.687	293.95	288.194	299.801	39.3473	2461.03	2324.31	2316.29	2300.19	74.3346	7337.37	7350.13	7661.92	7227.24	137.565	9768.55	9381.77	20212.9	19980.9	154.808	38503.5	23296.9
13.8705	37045.4	21052.3	102315	10.1273	16846.6	9715.26	50960	2.91104	4674.79	3345.19	12794	2.76044	55.6924	53.9686	57.0342	57.9221	9.26443	239.577	251.971	240.024	238.836	12.8529	188.027	182.504	190.48	185.574	29.3583	415.371	408.643	417.27	409.949	46.8459	2671	2881.12	2851.49	2695.8	80.9297	7830.46	7810.1	8039.91	8101.88	137.575	9611.64	9939.97	20778	20015.7	187.01	47184.1	27811.5
10.178	27978.3	14645.4	75486.5	15.5556	25375.8	14926.1	74284.4	2.93906	4561.96	3346.53	11995.7	1.55309	32.9192	31.8421	31.0626	31.8336	8.10533	210.479	214.545	209.868	210.493	11.3886	159.483	158.469	156.214	165.562	28.2891	379.178	386.972	388.603	386.363	44.6563	2773.44	2758.53	2644.51	2700.89	96.0811	9883.51	9423.23	9342.38	9182.57	118.219	8277.75	8618.14	16972	17837.1	152.811	37397.4	21496.4
13.5723	36810.1	19205.4	101308	28.1402	44467	25926	141565	2.51547	4128.88	3030.78	10779.6	3.65607	78.006	75.1373	75.6157	78.1179	5.10946	133.221	137.836	143.412	141.491	11.3077	161.041	156.135	157.113	154.558	29.4914	415.447	388.184	395.725	387.759	54.9152	3350.27	3211.22	3392.41	3346.07	87.3878	8239.89	8209.29	8712.13	8447.32	123.435	8676.25	9008.54	17677.5	17257.3	169.086	41687.2	24548.5
16.418	44319.6	24138.5	119237	13.7576	20991.8	13249.8	64562.5	2.95081	4785.44	3464.67	12523.6	4.5318	89.319	92.187	94.6948	94.9724	6.21583	159.544	175.411	174.304	166.467	17.3016	239.98	245.262	237.941	241.931	25.1191	354.617	360.401	335.462	360.53	49.0501	2931.85	3006.03	2970.38	3077.53	68.2909	6573.45	6540.43	6578.26	6606.14	101.894	7684.3	7132.53	14667.9	15356.4	164.966	40091.6	23587.1
5.9995	16880.8	8698.67	47421.4	22.324	34419	21556	108421	2.13376	3329	2548.36	9155.28	4.32034	90.0949	92.8379	91.6415	85.0731	5.49049	152.429	144.221	141.12	146.743	11.7056	172.826	162.483	166.107	158.857	23.6924	340.937	339.551	317.189	314.052	35.5567	2230.58	2080.95	2131.55	2129.45	89.005	8516.56	9188.59	8646.78	8368.62	132.322	9561.33	8922.44	19038.9	19949.7	151.956	39246.4	22167.1
11.8197	31883.3	16928.6	86495.6	27.3501	44620.9	26662.9	130593	2.91396	4542.18	3427.85	12905.3	3.15402	67.1395	63.2852	66.1249	66.8402	7.01761	191.902	188.982	184.282	189.775	11.1346	160.533	164.434	149.759	157.4	23.1659	322.317	332.701	308.543	304.161	35.1573	2191.42	2057.91	2106.77	2017.04	93.4207	9541.95	9136.33	8987.47	9079.68	133.849	9801.42	9445.19	20125.1	20174.7	196.452	50995.4	27737.8
15.5286	42863.6	23826.5	116046	14.1939	21661.4	13170.7	70240.9	2.39435	3630.65	2883.39	10510.8	2.51309	53.0417	51.2794	49.1508	48.9195	7.79843	214.271	208.784	217.522	202.314	17.7981	249.88	240.677	239.899	242.003	27.8616	370.076	380.357	378.535	391.795	37.0811	2123.04	2181.78	2213.78	2247.54	73.2475	7098.04	7205.42	6906.15	7011.02	121.857	9100.87	8513.91	18127.6	17312.7	174.863	42240	26510.5
6.32419	16829	9181.98	47431.8	23.1477	36464.4	22297.4	116360	2.57033	4129.32	3055.05	10520.9	3.51196	71.5316	72.1164	69.9323	71.1921	9.44381	259.95	244.39	250.677	247.633	11.7253	166.387	165.684	168.372	168.117	26.1726	343.017	348.428	362.031	349.507	39.5346	2426.43	2417.91	2423.04	2281.16	78.6037	7488.87	7470.61	7823.05	7904.26	112.124	7974.49	8100.62	16481	16604.2	168.041	41926.9	24165.5
5.96539	17317.3	8808.39	46766.7	35.6948	55292.4	34426.3	180122	2.61952	4136.37	3038.37	11167	3.16568	66.6806	63.4358	63.8683	65.9335	8.74794	245.405	245.382	231.507	243.1	13.929	203.751	195.5	190.831	206.213	25.3867	345.273	339.527	333.006	343.858	39.6946	2459.29	2392.26	2358.94	2254.4	70.0239	7107.91	6611.46	7066.64	6998.18	125.585	8863.37	8971.97	18215.9	18201.4	171.861	42087.5	24332
5.36543	14494	8094.26	40042.8	21.3373	33385.5	20526	104157	2.53355	3987.21	3101.68	10244.4	4.37399	90.8252	85.7171	85.5367	85.8068	7.78054	215.835	211.843	208.873	217.224	13.5025	195.777	192.478	186.458	184.596	23.0342	322.854	309.762	314.859	307.971	59.8974	3643.07	3683.48	3613.19	3758.02	89.2709	8581.5	8441.04	9125.35	8874.27	111.918	8459.81	7598.26	16744.4	17132	150.268	35738.6	20962.3
8.0797	22108.7	12402.4	59409.4	24.8263	41499.4	22593.8	122523	2.98309	4964.89	3643.07	13192.2	2.6639	55.1117	52.4152	54.1129	51.8656	6.80595	184.552	174.318	191.915	175.087	13.5401	186.587	190.436	186.107	183.329	24.2642	319.83	345.008	342.065	340.945	50.3155	2957.76	3048.08	2866.8	2980.06	70.9891	7306.5	7146.69	6751.84	6959.9	130.929	9239.42	8885.31	19654.7	19746.5	156.35	38272.1	23577.4
9.25391	25042.7	13228.8	71176	10.3408	16571.1	9887.26	52063.8	2.18746	3642.09	2455.42	9429	4.2051	84.3269	88.3007	83.5591	82.5878	5.80887	161.455	162.957	157.74	161.642	12.3854	177.07	169.079	169.701	168.254	22.1831	302.671	299.401	311.119	301.819	34.1433	2017.64	2035.97	1972.75	2012	85.8434	8104.14	8067.14	8396.65	8349.3	129.727	9208.14	9279.73	19221.3	18944.2	169.964	41124.2	24071.3
11.4014	30501.8	16652.9	82176.7	9.00933	13735.7	8703.03	45147.2	2.34233	3644.04	2802.25	9742.28	2.04635	42.1809	41.6032	41.0261	42.6604	8.96112	252.956	246.293	235.059	252.101	19.2252	259.664	258.352	259.626	271.172	28.6059	392.14	391.283	388.561	396.862	41.3177	2350.38	2583.19	2499.81	2559.84	71.867	7356.98	7280.9	6870.97	6823.64	115.09	8236.98	7796.92	17320.9	17043	193.84	48306.5	27694.8
8.33057	24102.2	12187.3	63476.8	19.9887	31232.6	19725	98962.5	2.06128	3111.72	2425.83	8406.01	1.56178	31.8601	30.8867	33.2103	31.2938	7.05982	195.737	187.291	199.161	198.764	15.7193	229.624	221.653	217.2	212.982	21.5675	293.015	301.077	288.786	295.555	47.5513	2760.98	2841.41	2839.55	2757.54	69.8286	6719.62	6740.34	6603.95	7097.79	129.527	9339.57	9396.8	18043.9	18644.8	152.329	38605.3	22692.9
18.0235	49733.6	25220.9	131603	36.685	57917.8	35009.4	181063	2.25216	3463.22	2717.27	9960.48	2.21388	44.2229	46.2728	43.35	45.0677	7.0697	182.637	198.629	195.708	190.102	15.7805	218.849	218.852	212.754	220.167	21.2817	297.462	306.833	281.696	307.617	56.1444	3391.1	3414.92	3252.81	3360.03	94.2687	9748.73	9002.44	9256.18	9662.01	121.443	8807.22	8930.62	18492.7	17829.1	192.268	47186.9	27989.7
15.0094	41254.8	22975.9	117249	31.4705	52449	29820.9	159993	2.25191	3650.76	2694.35	9819.23	3.72959	76.169	73.0235	73.9655	75.9024	9.93182	267.125	257.67	260.41	273.909	11.5054	163.412	170.017	169.609	167.631	25.3652	346.825	348.691	341.531	366.834	36.1273	2222.09	2239.82	2197.66	2107.08	99.8242	9555.82	9587.64	9541.04	9656.84	142.333	10113.4	10098.2	20478	20255.2	194.142	48110.4	27277.4
11.3081	31519.8	16118.6	89193.1	24.7992	38000.3	22753.8	127704	2.98931	4740.29	3566.55	13099	3.01709	64.3182	64.0384	61.0042	62.6877	5.80798	152.784	158.908	160.654	160.059	15.4838	211.119	222.174	220.151	209.444	26.9359	367.812	372.038	386.96	374.612	33.3457	2039.6	1997.92	2039.39	1932.82	94.6505	9052.5	9566.83	9210.69	9620.33	144.428	10970.4	9753.54	20080.6	21022.7	184.286	44685.2	27945.6
9.27153	25272.9	13860.1	71831.5	10.8842	17102	10745.2	54890	2.15462	3273.89	2636.3	8709.83	3.22422	67.1556	63.0975	63.2316	63.4602	6.89501	179.513	188.688	181.644	189.217	18.5865	260.641	259.938	273.208	249.749	28.1398	405.83	398.886	379.464	386.291	51.111	2952.47	2907.63	2914.42	3187.5	65.6267	6446.11	6708.24	6663.03	6594.41	120.281	8850.06	8539.42	17564.5	16739.6	194.437	46305.4	29222.9
15.1212	40613.7	22129.3	108224	31.9976	50806	29383.7	157116	2.3363	3850.38	2879.74	9809.43	4.43188	87.3155	89.869	90.8337	90.7175	6.73402	187.054	189.161	175.808	180.935	15.9954	231.558	230.973	229.617	222.269	20.4431	284.216	281.338	272.048	280.383	36.8139	2161.47	2156.97	2289.43	2113.47	67.0061	6681.41	6760.85	6862.28	6919.9	109.481	8106.87	8012.49	15574.6	15916.7	158.752	39966.8	23016.6
18.9103	55095.2	28217.8	149189	25.4481	41103.1	24365.2	126461	2.96492	4879.38	3521.67	12754.3	4.86609	101.975	99.3982	99.2565	102.035	7.72763	202.217	205.277	211.21	203.462	18.0739	259.554	255.412	266.775	262.13	26.2337	352.751	349.182	360.673	373.18	33.9136	2076.84	2109.8	2119.72	1996	83.8102	7988.57	8259.45	8606.28	8412.18	120.331	8916.8	8651.39	17141.4	18020.2	176.072	45483.5	25273.5
9.85471	28034.5	13995.4	70736.3	21.1469	32394.3	20306.7	103444	2.74563	4221.94	3195.22	11279.3	4.16935	85.038	87.4602	82.7516	84.286	5.89702	164.742	157.517	163.552	160.516	12.2803	168.944	180.374	178.578	177.504	20.655	293.165	287.608	287.455	279.593	33.4347	2028.19	1983.43	1934.43	2078.94	87.6679	8609.33	8294.61	8379.25	8971.08	105.7	7400.15	7288.72	14864.5	15191.8	169.874	43207.5	26061.7
18.6083	53205.7	27362.2	144092	19.1386	32106.8	18308.3	95938.3	2.12501	3379.13	2567.25	9031.88	1.88509	36.8828	39.2855	38.5775	39.6206	6.72666	180.735	175.155	178.504	184.635	16.6224	237.912	229.459	235.295	239.48	23.9378	335.129	317.017	332.064	326.554	35.5936	2159.67	2165.99	2104.88	2213.61	70.8954	6844.9	7091.34	7122.53	6709.32	128.036	9745.41	9341.61	18729.1	18575.4	176.766	45719.1	25111.5
5.15613	13906.9	7220.17	38675.1	10.1264	16067	9846.98	50583.2	2.00371	3183.49	2351.31	8553.18	1.50882	30.8421	30.1957	30.2132	32.2091	9.26978	246.474	261.903	250.845	257.815	18.0949	244.194	255.794	261.044	248.545	23.6048	338.898	328	323.819	312.459	42.4725	2484.64	2580.64	2493.37	2535.22	73.5497	7252.24	7163.04	7106.42	7234.25	132.568	9236.56	9208.78	19240.3	18836.6	152.149	38439.1	21385.1
8.12577	21739.8	11351.8	58190.1	11.3252	17423.8	10465.1	58376.4	2.37106	3753.88	2736.84	9579.2	1.09944	21.5668	22.1846	22.7555	23.6334	7.08298	191.209	182.411	192.577	188.552	10.0532	137.015	139.216	138.759	146.883	21.7969	286.459	308.173	287.226	286.1	42.3137	2599.73	2558.84	2632.44	2521.79	90.6422	8689.14	8538.69	8902.46	9235.89	131.401	9894.54	8921.74	18332.3	18777	183.032	43433.1	26436.4
16.0966	46479.1	23337.1	117313	27.8789	46135.7	26258.6	141493	2.74078	4320.04	3354.89	11372.6	1.10674	22.1982	22.8689	22.5501	21.8675	9.2933	258.995	246.308	258.655	248.727	12.9289	190.904	186.427	188.426	177.894	26.8045	385.413	378.654	384.978	354.578	33.0959	2041.95	1987.39	1920.8	2057.73	81.5531	8105.22	8407.66	7878.07	8139.61	117.919	8917.7	7892.3	16684.5	16585.9	166.426	42266.5	23577
9.4061	25528.8	13891	73313.2	35.6011	58605.8	32964.7	177832	2.84531	4500.67	3325.5	12235.9	1.68327	34.1348	34.6901	34.6982	33.4346	8.94308	240.075	231.713	232.924	242.067	19.5456	267.967	282.626	273.637	285.371	24.4008	350.138	324.904	343.404	329.613	44.6832	2739.79	2704.48	2682.16	2737.54	85.8061	8546.1	8861.4	8247.55	8635.05	108.748	7673.95	7841.31	15774.6	15161.3	189.198	45164.4	28654.6
8.85264	24541.6	12823.2	68721.3	37.2927	58750.3	36614.5	178238	2.73333	4466.28	3292.1	11884	3.43936	68.5308	70.5918	72.4111	68.6665	8.16778	229.455	213.091	227.688	212.929	10.5329	146.353	142.616	151.949	152.253	27.2143	363.133	362.602	384.206	367.312	44.4719	2547.62	2636.29	2532.31	2738.43	71.8852	6760.06	6820.57	6946.65	7032.87	139.683	10258.8	9940.44	19581.1	20604.2	186.998	48377.5	27047.8
10.1003	27331.2	15108	78393.2	15.4839	24612.9	15102.7	73465.8	2.77	4364.52	3127.53	11455.3	2.53828	53.864	52.955	49.7475	53.0545	7.50182	211.906	197.45	207.026	198.327	11.9344	161.299	162.801	162.774	175.395	21.8313	306.528	306.081	307.043	309.631	52.7145	3255.02	3242.61	3049.55	3115.7	92.5699	9215.68	8945.59	8919.39	9146.67	110.173	8000.51	7977.03	16053.4	16128.1	188.195	44549.9	26644.5
12.999	36826.4	18961.4	101888	23.3096	38226.5	21980.7	116713	2.28789	3561.4	2783.25	9376.96	2.5646	51.7171	51.5684	53.9358	50.658	6.99296	196.31	185.628	197.102	192.661	14.4124	212.899	205.589	202.438	202.003	23.9265	334.823	332.432	329.935	320.478	52.7872	3107.19	3087.67	3159.54	3140.32	60.3357	5717.03	6190.93	6042.07	5912.8	100.491	7317.63	7008.61	14826.7	14365.9	181.948	45365.2	27921
9.34067	27199	14047.9	72093.3	13.6701	22393.5	12690	66665.2	2.87673	4733.07	3398.5	11639.4	4.69644	100.247	98.825	96.5773	94.2185	5.47714	148.581	144.473	142.06	152.943	11.6057	159.78	168.61	164.582	167.264	22.4724	298.765	295.008	321.942	314.89	57.4063	3443.87	3431.38	3266.46	3291.26	60.9441	6085.15	6169.16	5855.62	5945.64	126.424	9612.26	8618.93	17990.1	19113.4	154.556	39501.9	23557.6
10.7685	31157.3	16090.3	83512.7	38.3565	60135.2	36321.1	193317	2.76033	4438.64	3110.65	12143.9	4.4251	94.3422	90.2687	91.0681	91.9752	6.59976	169.116	174.686	171.886	169.992	10.1618	142.771	143.073	147.808	137.896	21.0767	290.258	303.915	297.672	280.084	59.4533	3615.2	3542.22	3651.88	3509.2	81.1157	7922.37	7660.97	8246.22	7642.28	149.334	11118	10773.4	21313.5	21231.5	157.101	38851.4	22575.3
17.2575	48395.9	24877.2	124064	31.8535	50358.3	30173.6	161790	2.90604	4586.98	3442.81	11962.4	1.16944	22.8641	24.792	23.4045	23.2077	8.73844	231.89	244.982	235.962	240.356	17.802	241.918	262.378	262.846	254.357	29.3067	385.684	392.96	405.357	399.083	40.3125	2509.77	2337.33	2317.62	2419.12	98.1688	9914.89	9784.42	9664.93	9560.65	117.822	9000.95	8456.53	16944.1	17359	172.452	43318.7	25406.1
14.9411	40094.4	21633.1	110922	11.1679	18290.5	10365	55259.9	2.8139	4477.58	3393.63	11637.4	4.30195	90.8733	87.0325	86.5349	92.2101	6.84025	186.107	189.43	191.031	184.793	12.6027	169.728	179.838	177.98	183.661	29.7206	416.535	425.377	389.294	398.769	48.5495	3006.57	2967.07	3017.57	2974.05	87.5774	8874.63	8485.85	8274.69	8314.33	129.756	9294.72	8893.62	18676.3	18959.6	198.497	51070.5	27689.7
14.4634	39464.3	21459.8	113603	36.0222	57665.4	35214	180679	2.67417	4036.89	3260.99	11839.9	4.763	94.1465	100.936	96.301	97.4069	5.41311	145.066	147.2	144.854	139.133	11.22	154.337	152.598	160.781	166.507	26.7977	374.114	354.608	378.055	371.1	39.3398	2355.56	2433.48	2238.42	2284.83	69.316	6585.44	7074.17	7147.96	6702.02	148.339	10866.1	10715.3	21851.5	21015.3	154.283	37408.4	22475.3
12.5402	35122.1	17490.8	91953.5	30.2058	47483.2	29718.7	153458	2.79098	4610.13	3428.82	11614.6	4.74258	94.2172	99.8877	98.5648	96.919	7.16922	200.848	193.267	200.814	185.455	12.2452	180.916	176.741	170.336	167.345	27.7429	400.807	366.105	397.563	379.722	33.9947	1997.4	1998.91	1959.54	2000.75	83.4775	8071.25	7908.2	8607.22	7904.08	118.021	8218.32	8322.4	17915.3	16786.4	194.302	46594.7	29413.8
7.55884	21548.8	11226.9	59015.6	35.4537	59118.6	32239.9	182075	2.06448	3284.98	2522.65	8749.35	3.17989	67.0896	68.273	67.6791	68.3933	5.98263	163.607	157.967	157.06	167.914	12.9536	176.62	186.214	189.644	182.75	20.6364	286.216	280.288	294.704	289.778	48.1464	2752.44	2805.07	2921.51	2937.56	94.6018	9365.66	9348.34	9806.15	9804.74	131.206	9288.03	8821.19	19721.8	18871.1	156.567	38144.5	22701.3
19.7388	53387	28433.7	153687	25.2345	38905.8	24292.2	121145	2.44347	3946.97	2760.82	10184.7	4.09698	84.5097	84.5733	85.3239	80.0142	7.06193	182.375	192.271	190.583	191.637	18.3748	251.79	264.945	265.961	256.385	20.823	300.777	278.398	286.504	294.974	50.2555	3096.58	2854.59	3055.06	3031.27	94.9108	9258.59	9018.36	9739.42	9827.98	136.709	9641.09	9933.74	20766.1	20643.8	191.205	45145.7	29099.9
9.50735	25895.9	14301	69624.4	32.7632	50612.7	31489	165292	2.63003	4065.62	3052.66	10867.8	1.48007	31.7986	30.0281	30.9814	29.2523	7.95546	205.924	208.893	215.361	224.6	12.6412	176.017	173.611	186.939	184.61	29.2575	390.712	395.341	414.494	399.614	49.231	3077.71	3037.4	2979.38	2957.09	77.9009	8074.86	7479.07	7774.91	8003.81	137.201	10412.8	9764.96	19483.4	19843.4	188.287	48884.3	28138.4
9.195	26331.7	12927.5	67057	21.7185	35275.4	19827	108056	2.60974	3988.84	2913.37	10960.1	4.27129	91.7746	89.5603	90.7417	87.0922	8.26882	231.38	214.488	228.965	221.002	17.667	258.838	237.704	241.193	256.355	24.436	320.785	342.897	334.33	337.035	57.7689	3608.82	3306.08	3523.02	3485.88	77.8187	7829.38	7602.52	7468.12	7430.25	134.485	9411.62	9196.31	20461	20292.7	197.674	49185.6	28201.1
11.3535	30900.4	16335.2	81460.9	29.1504	46689.9	27720.1	136630	2.7897	4318.57	3399.36	11838.5	1.18854	23.662	24.5372	25.1482	25.3448	5.87022	152.478	161.768	151.354	155.675	16.8909	250.381	247.401	229.389	250.298	21.9246	290.686	303.896	310.425	287.503	54.1198	3194.75	3262.21	3235.21	3350.99	91.3624	8929.27	8621.67	8862.61	8694.93	139.228	10281.4	9909.57	20763.8	20967	170.931	40567	25358.3
12.991	36749	19232.3	99692.6	11.0296	17791	10117.8	53656.8	2.68926	4299.95	3022.32	10793.7	4.14939	87.8482	88.0795	88.4178	80.7802	8.19288	227.785	210.121	223.119	212.654	16.5825	245.464	241.933	224.889	223.549	23.6283	334.654	323.13	319.424	334.071	57.2518	3521.71	3539.61	3587.12	3410.99	76.9452	7696.09	7564.74	7573.41	7806.76	113.124	8149.23	7909.7	17306.6	16699.8	171.971	42431.6	24790.9
17.6627	49172.3	26866	133381	18.0298	29962.7	16200.5	87673.8	2.91829	4658.26	3277.2	11865.5	1.94238	38.2429	40.3423	38.8977	39.151	7.16298	194.932	189.756	188.508	188.062	12.4493	180.162	181.162	172.155	184.037	29.9098	402.776	431.063	393.74	415.448	59.1336	3453.55	3565.53	3660.21	3608.72	97.0792	9873.82	9133.75	9459.51	9578.08	105.493	8026.76	7682.26	14820.6	15899.1	190.804	47620.9	28622.5
15.9533	43346.1	22901.5	115311	19.7184	30134.7	18823.9	100048	2.74037	4477.28	3155.14	11914.2	3.1796	63.5983	68.2355	65.6829	65.3123	9.8219	254.396	270.362	252.698	253.25	14.4678	195.213	213.279	213.682	205.403	24.4772	337.717	328.874	347.578	329.386	51.7043	3193.75	3102.91	3109.84	2972.06	86.1219	8630.96	8787.02	8872.57	8809.2	105.725	7925.1	7633.34	16176.6	15937.4	168.639	43252.5	25094.4
13.0082	37146.7	18750.2	93215	34.103	53905.9	31026.8	160356	2.98502	4890.23	3572.98	12256.8	2.39884	48.1985	48.7874	49.5047	50.3688	5.25686	144.015	146.353	139.227	141.525	15.5239	224.047	218.366	225.109	220.34	29.9239	429.837	400.29	421.698	394.606	39.0595	2332.66	2278.87	2429.18	2248.45	81.7698	8027.08	7839.9	8473.29	8053.59	122.862	9280.15	8733.2	17500.1	18346.8	172.471	41488.4	24925.1
16.7713	44967.7	25823.7	129432	18.6329	30671.7	17657	90662.3	2.96653	4639.9	3501.97	12219.4	4.86453	99.6157	98.7594	95.4438	97.7443	7.21469	198.005	189.246	193.024	196.191	13.5529	197.008	198.842	200.671	183.276	24.5802	341.086	345.046	345.08	330.711	51.8947	3171.2	3243.25	3094.98	3230.58	78.3076	7768.3	7415.15	7477.31	8007.75	105.081	7827.12	7529.23	15939.4	15239.6	188.491	48613.1	27832.4
13.6636	39315.1	19149.3	107302	28.5408	47762.9	26203.2	137593	2.00756	3244.65	2466.82	8387.56	3.95569	80.9248	79.4393	78.0324	79.6566	8.89931	244.235	245.601	232.352	247.343	12.7536	181.88	180.867	180.295	187.627	26.6133	354.271	353.98	384.437	382.64	33.0654	2071.61	2005.14	2038.08	1984.16	95.4369	9604.36	8958.13	9826.23	9575.38	144.738	10820.5	9652.94	20609.4	21327	169.711	44007	25310
12.5921	35453.2	19195.6	92248.9	15.9924	25411.8	15312.2	81702.2	2.46652	3921.49	2985.05	10681	3.47434	68.5187	72.803	73.8414	73.8919	5.75484	151.635	159.198	162.046	158.295	16.589	243.007	225.467	237.943	239.281	20.0274	289.426	286.074	272.192	284.045	54.6599	3185.83	3337.19	3352.15	3188.96	60.6781	5905.65	6087.63	6126.05	6047.32	148.74	11079.5	10886.7	21901.5	22162.5	191.161	47292.8	27991.1
5.11922	14372.5	7460.38	37762.7	27.0943	43916.4	25538.8	128154	2.33454	3611.09	2649.53	10040.8	2.62439	56.208	55.3678	53.3268	53.4464	6.09831	172.296	170.743	171.871	169.724	10.0472	148.151	147.131	143.205	135.386	21.7241	311.915	302.694	305.708	287.264	45.5483	2698.45	2817.69	2594.57	2843.29	83.8198	8086.28	8495.41	8226.88	8048.49	134.355	9400.42	9266.31	19714.6	18823.4	151.6	37204.2	22739
6.17743	16801.5	8749.91	47826.5	19.7642	31055	18859.8	93302.2	2.79678	4288.91	3384.02	12330.5	2.38367	46.4643	50.2464	47.7131	50.6848	7.85759	209.814	205.769	212.321	202.353	12.2073	168.82	171.218	178.774	166.16	21.3112	290.575	286.212	279.18	302.907	34.7757	2099.31	2062.99	2024.92	1976.95	83.6392	8655.84	8075.71	7961.95	8032.65	139.318	10039.5	10164.7	19429.3	20786.7	192.846	47871.2	27430.2
5.85496	15585.1	8297.43	45971.2	38.5164	61628.7	35828.6	185423	2.96973	4793.6	3346.92	12556.7	1.23443	25.4816	24.9031	24.984	24.3819	8.434	235.728	222.001	218.828	226.203	12.8695	174.524	174.401	186.808	183.905	20.2449	284.429	273.916	268.764	284.244	47.5869	2981.63	2787.57	2886.15	2862.76	85.6158	8746.53	8237.89	8188.79	8599.77	123.748	8696.21	8759.61	17446.5	18684.7	168.544	40833.4	24795.5
13.4974	39499.1	20490.6	98561.9	15.3195	24327.3	13734.9	74594.9	2.181	3485.88	2471.73	9595.94	4.18571	89.7093	87.5049	82.6321	87.1875	5.19701	133.838	145.404	135.776	145.079	11.7595	162.001	169.796	172.907	171.925	22.5192	310.629	317.47	309.71	296.187	38.399	2266.71	2309.04	2315.39	2236.78	66.7337	6617.85	6885.29	6873.46	6822.64	103.386	7697.81	7490.69	14535.8	14452.9	170.084	43044.3	25842.9
12.8063	36594.2	19536	93511	19.0937	31098.7	18577.2	97322.2	2.64617	4186.88	3012.21	11254.1	1.20414	24.1487	24.0645	24.0416	23.5528	7.3751	198.121	189.972	202.896	194.147	14.7434	202.492	200.874	214.835	209.05	22.214	300.534	293.439	315.026	319.469	51.3614	2946.03	3177.87	2998.08	3204.58	81.9642	8477.74	7955.45	8262.65	8456.73	125.404	8890.12	8550.37	19249.2	19138.7	195.796	47422.8	28706.7
14.0926	40473.7	20349.1	102642	19.6519	31965.2	17675.9	91952.8	2.39328	3921.62	2743.17	9735.85	2.0248	40.5404	40.4123	40.3154	41.7203	6.22105	164.424	166.565	171.763	171.243	13.126	184.91	181.392	186.78	192.493	21.6686	290.04	293.658	300.594	310.128	39.6638	2442.97	2340.05	2264.27	2404.85	91.3726	8978.22	9037.55	9477.41	8595.16	129.209	9207.15	8663.81	18107.5	19608	182.049	47110.5	25724.3
17.5219	47121	25731.9	136044	28.2227	45874	27025.2	143842	2.33305	3802.89	2845.95	10049.2	1.54574	30.3716	33.2163	30.3995	30.2219	7.20962	199.225	186.552	186.062	198.781	14.7786	209.881	209.557	218.096	219.261	29.9547	421.511	401.899	398.789	401.963	34.7105	2091.49	2124.71	2137.61	1973.45	73.6626	7216.45	7203.14	7006.91	7510.51	136.399	9918.27	9229.7	19767.5	20560.9	193.182	47901.2	27909
5.18436	14409.4	7828.91	40493.5	10.151	15755.7	9987.8	52204.1	2.73367	4391.63	3151.57	11557.6	4.21757	85.3155	86.7313	83.6788	90.2442	8.43143	226.834	219.441	230.991	235.781	10.7194	147.483	154.128	152.576	147.91	28.4002	381.126	394.023	402.499	403.174	45.3001	2701.04	2753.9	2583.5	2777.19	90.6871	8605.14	8618.25	9349.93	8801.48	128.283	9708.53	9330.54	18979.9	18487.1	152.341	37595.3	23372.9
7.71399	20513.7	10814.8	58454.4	18.0212	28522	17338.7	88254.5	2.17376	3345.55	2675.19	8826.85	3.29384	69.8999	70.1933	69.1384	69.2493	6.9711	188.321	194.647	182.845	187.808	12.8351	172.933	178.995	178.055	174.884	24.8209	335.365	354.813	330.855	356.008	51.3973	3086.75	2957.02	3142.85	3151.07	90.7733	9133.27	9326.39	8703.83	8850.76	104.759	7484.02	7238.93	15522.8	16063.6	195.572	50614	28531.6
16.7576	45792.6	25037.3	129951	27.1738	44110.2	24838.8	134783	2.48605	3945.11	2777.99	10766.1	1.6857	34.2551	34.6862	34.0339	33.6818	9.71977	260.579	249.289	249.724	251.561	12.8106	189.794	189.186	179.49	174.333	28.2661	377.637	406.809	389.85	370.634	54.9177	3127.64	3367.56	3149.16	3143.94	82.6565	8202.45	8326.5	7825.03	8299.27	122.436	8534.99	8704.65	17193.4	18414.1	195.138	46086.1	29030.3
6.31656	16947.1	9636.95	48680.2	24.4836	41016	23797.8	119666	2.90621	4399.69	3455.55	12854.7	4.46861	93.478	87.2757	91.1302	89.8132	6.26466	171.831	164.299	162.809	170.889	15.8564	231.162	222.592	223.141	213.832	28.8354	389.729	381.246	409.294	388.824	52.997	3121.77	3122.78	3206.59	3194.95	67.0906	6816.19	6781.03	6382.94	6535.12	107.663	8024.82	7202.85	16466.6	16019.3	156.123	37180.3	23818.2
9.22791	26980.4	13373.1	67381.4	13.7686	22874.5	12965.6	69015.4	2.28762	3722.23	2762.41	9844.45	3.35608	66.1138	67.6739	70.162	66.4732	9.39883	264.695	259.089	250.67	243.501	11.0539	159.432	149.83	153.716	155.892	27.2652	392.483	369.585	371.429	364.538	59.4244	3375.98	3504.13	3654.82	3710.34	76.4127	7506.01	7492.97	7709.64	7344.15	141.507	10507.7	10318.9	20460.8	21444.7	178.367	43084.2	26981.3
9.70162	26857.3	13861	70347.4	23.2949	36210.3	21925.7	110844	2.70092	4453.81	3199.84	11726	4.15531	86.4385	83.2359	82.0957	84.4211	8.07055	211.828	212.97	221.053	223.712	13.987	199.244	191.605	197.198	193.336	27.2353	381.691	384.207	360.241	357.323	49.8425	2884.82	2871.28	2990.13	2956.71	64.6933	6327.84	6456.44	6139.04	6398.92	122.227	9105.96	8773.67	17414.2	18340	170.22	41074.3	24098.2
11.2274	30879.5	16826.1	83820.7	29.7412	47974.7	28483.2	144590	2.30643	3671.01	2815.82	9662.48	3.40069	71.9398	69.6381	67.2542	70.6217	8.41457	225.857	228.13	225.315	229.82	14.968	211.777	210.309	215.427	202.877	28.9038	383.554	416.953	415.084	389.519	47.7447	2951.83	2900.83	2832.48	2969.14	84.0045	7951.18	8173.88	8487.39	8626.1	124.367	9127.61	8926.9	18060.5	17391.9	196.728	50702.1	28389
5.76093	15715.1	8486.43	42136.4	35.3997	55740.9	31680.9	167459	2.18044	3433.78	2497.47	9073.2	4.16963	81.9801	87.1222	82.257	88.9215	7.03311	191.013	181.262	180.586	180.813	14.9184	204.143	219.526	212.506	203.246	27.4794	360.755	382.208	374.325	379.544	42.5623	2580.88	2459.99	2495.54	2516.39	95.331	9640.08	9874.37	9580.02	9027.73	132.192	9526.29	9384.77	18705.5	18656.8	182.829	47445.5	27055.9
11.9709	31828.6	17404	89212.6	22.6085	35248.5	21131.9	106514	2.01773	3338.86	2361	8392.34	3.64013	74.8612	72.6929	77.7374	74.549	6.62423	173.814	179.015	185.375	174.816	14.6953	213.693	214.624	213.214	199.394	28.3408	371.723	380.369	374.84	388.303	32.1985	1951.89	1868.07	2006.08	1947.76	89.2826	9077.99	9086.66	9222.58	9081.08	100.337	7063.28	7294.75	14798.2	15263.8	181.777	46460.5	25392.1
16.6957	47496.4	25463.3	127848	25.0241	40958.7	24024.6	124523	2.95285	4628.39	3461.19	11866.5	1.19305	25.4171	24.3702	25.5874	24.5448	6.18908	167.768	161.287	165.498	159.595	15.6065	210.328	221.025	220.41	216.83	29.5536	406.61	419.974	399.46	399.874	55.5565	3238.34	3365.86	3349.23	3181.88	65.7941	6275.21	6426.21	6510.49	6463.45	118.928	8673.6	8099.74	17319.5	17811.9	165.65	40005.3	24575.9
11.2171	32672.1	17158.3	81700.6	29.5954	47698.3	28499.2	141718	2.82834	4336.65	3466.91	11903	1.63988	33.75	35.249	31.9789	32.5623	5.85814	154.42	160.051	154.589	162.953	15.1362	203.677	209.597	219.146	206.197	22.4425	323.418	294.207	308.096	321.253	44.5047	2591.45	2718.66	2789.51	2641.62	91.3311	9044.64	8759.84	8672.15	9234.71	121.311	8706.01	8885.41	18541.1	18192.6	193.333	49756.6	29204.8
18.6572	49602	26072.6	144730	9.7089	15453.4	9150.5	48812.9	2.10932	3349.57	2475.25	9221.46	3.98498	83.0052	84.54	82.2191	83.0661	6.01577	157.693	166.179	157.612	160.231	19.3732	262.516	279.724	260.351	263.074	28.0065	404.856	397.936	399.076	390.239	33.134	1902.18	2029.74	2043.86	1978.85	61.9384	5905.41	6134.35	6321.83	5847.66	135.7	10004.3	9386.48	19169.3	19528.5	175.884	42074.6	26324.7
18.9387	54837.6	28757.7	148038	10.2627	16795.8	9449.35	51118.2	2.6249	4100.83	2932.36	11171.9	1.63293	34.4467	33.4581	33.6021	32.7751	5.41557	147.796	138.794	148.907	139.611	16.992	250.275	230.065	235.505	243.691	21.072	288.188	289.047	288.557	298.329	42.2867	2591.11	2555.98	2635.13	2550.77	67.1069	6448.65	6822.92	6368.95	6772.09	138.739	10590.5	9289.9	21059.4	20260.8	188.609	44925.4	27522.3
15.4608	43416.1	23254.4	110601	28.8626	45741.3	26829.6	145701	2.85233	4402.15	3355.42	12086.5	1.13898	24.0882	22.4513	23.3148	23.1095	7.57421	197.501	213.574	194.623	198.988	15.9198	218.656	221.141	229.645	226.914	26.5331	351.305	350.35	377.925	374.777	49.7204	3035	3044.89	2979.98	2975.23	76.9779	7717.72	7838.1	7508.09	7411.17	149.424	10644	10284.8	21414.6	21528.1	165.472	41964.8	24631.5
12.8137	34396.4	19711.3	101310	17.7609	28711.5	17350.5	89982.9	2.80694	4314.75	3211.6	11547.2	2.60671	53.7709	55.0868	54.3783	54.4049	5.09925	133.505	131.439	138.502	143.467	13.298	185.299	197.117	181.707	197.013	29.1473	387.31	407.587	405.732	400.827	41.4376	2473.18	2355.6	2415.46	2487.27	72.0369	7186.88	7157.54	6828.88	6891	134.217	9746.28	9146.13	20139.4	18827.9	154.3	38180.6	22485.8
10.5772	29128.3	14946.4	81959.6	15.3038	23444.2	15131.7	75965	2.91122	4564.41	3445.07	12650.7	3.21376	64.9072	67.1534	63.8484	64.4171	8.51168	222.476	234.202	230.581	230.415	10.7918	152.732	152.038	158.202	154.181	26.8264	353.713	355.008	380.067	384.453	57.6545	3310.23	3322.52	3516.11	3397.97	82.3732	8146.28	8521.9	7938.01	8338.45	108.266	7894.82	7822.09	16356.7	15531.4	185.012	46306.7	26816.3
7.08256	19276	10079.6	55846.7	13.1274	20085.1	12389.6	67228.7	2.95463	4641.28	3457.96	12815.9	4.17622	81.6255	82.8759	83.0459	82.3824	8.80118	226.461	241.582	233.943	234.511	10.7801	156.351	158.429	149.723	157.028	25.4737	358.766	345.248	343.542	342.241	53.2145	3051.51	3328.08	3187.1	3128.41	77.7564	7976.2	7843.75	7474.29	7816.57	110.17	7709.48	7724.51	15612.4	16727.5	164.594	40831.4	24164
18.8139	52940.8	27114.2	136435	37.6778	58041.4	36820.1	189350	2.36464	3573.39	2869.05	9940.3	4.54807	89.0091	96.8185	94.1268	92.2073	6.62626	175.561	181.05	171.292	169.915	12.7163	187.055	182.218	187.573	184.891	27.719	376.039	391.835	385.404	384.943	54.3338	3097.51	3396.14	3200.14	3333.05	82.5809	8163.39	8243.07	8532.47	8419.47	115.257	8785.92	8256.44	16988.6	17021.6	169.975	42656.2	24447.7
14.5092	39125.2	21215.2	112055	32.0151	49063.4	31287.2	150947	2.53	3960.31	3102.52	10263.3	2.12574	44.4934	42.9179	43.5682	45.2424	5.10448	143.215	139.225	133.197	133.852	11.1577	162.1	162.146	157.112	157.442	28.6142	393.643	388.07	386.146	390.292	42.6633	2559.52	2538.9	2566.1	2647.53	63.3479	6462.43	5984.63	6095.71	6090.28	105.418	7645.21	7279.3	15462.4	15988.9	186.602	48434.8	27778.4
6.34442	18001.6	9632.53	49943.1	38.4974	61148.7	36173.9	195998	2.07985	3396.51	2364.2	9158.08	4.65471	91.9437	97.7578	98.8633	98.5743	5.15917	133.88	139.477	139.393	133.582	18.6867	255.813	252.563	260.938	274.286	24.4295	352.957	341.869	330.183	337.969	34.4195	2034.14	2123.97	1999.56	2058.42	81.7255	8217.41	8441.57	7792.14	8344.29	104.913	7684.79	7649.23	14596.1	16016.9	152.605	36132.9	21438.5
14.4132	39076.5	20305.8	103209	29.2089	48172.5	27399.7	150265	2.67411	4371.89	3000.78	11221.1	1.04717	21.3945	21.6943	22.4649	22.4491	5.18957	135.825	139.361	143.133	139.421	19.6982	276.383	283.382	267.096	277.146	21.0871	302.956	280.852	277.087	279.773	45.9376	2661.35	2641.43	2615.24	2880.65	66.9589	6695.15	6588.9	6654.96	6450.58	140.802	10659.5	9775.16	20475.7	19745.4	157.206	37646.7	24064.1
8.91899	25852.5	13351.7	65620.9	29.1176	47670.4	28633.7	136264	2.82432	4639.29	3216.11	11509.6	4.92965	99.9532	105.522	96.4301	105.127	9.78573	259.315	252.728	272.21	259.262	15.9257	222.498	215.464	217.981	225.431	25.9991	366.41	357.389	363.669	342.451	31.4762	1865.35	1801.52	1960.55	1879.45	60.534	6210.09	5740.76	6215.04	5880.4	143.005	10822	9909.3	20028.8	21938.6	170.221	40154.7	24222.9
16.6237	47080.9	24476.1	125358	34.9798	57050.7	33111.1	171155	2.24656	3439.24	2700.97	9102.19	2.05733	42.3933	41.3732	43.5983	41.0721	8.19546	228.174	219.907	225.29	218.417	12.7688	178.918	182.572	177.587	185.188	21.3531	299.907	306.081	288.776	284.934	34.136	1996.18	1944.72	1950.81	2079.92	72.6004	7275.62	6878.57	7458.68	7244.87	127.966	9223.1	9027.4	19620	18120.4	159.284	37606.2	22217.4
18.8625	50162.2	27292.8	136696	35.8721	59442.7	32610.9	179377	2.08073	3434.62	2551.9	8501.7	3.42535	70.6472	69.7484	66.7935	69.8534	7.47835	192.961	201.426	201.985	197.857	11.6579	159.454	169.349	167.994	171.212	22.256	295.156	310.575	302.52	301.553	53.2949	3136.98	3166.04	3141.67	3103.17	94.1416	8894.48	9284.9	9160.98	9420.87	111.816	8236.02	7979.61	17159.2	16258.3	175.768	43658.4	25910.8
7.55815	20658.1	11191.6	55088.8	25.962	39717.7	24085.8	122248	2.63042	3966.66	2935.22	11086.3	2.47093	49.8096	49.4618	50.1086	50.481	5.955	167.438	166.236	159.151	155.317	18.4937	262.219	250.492	272.761	258.313	27.0906	391.632	383.279	365.328	375.202	42.4186	2644.2	2517.67	2473.75	2445.69	75.3723	7672.13	7665.97	7250.67	7797.15	105.216	7423.22	7586.84	14754.8	15354.2	172.384	42707.5	26381.8
11.9801	33400	17876.4	94384.5	29.776	46156.6	27884.7	139641	2.35848	3832	2769	9521.06	3.49774	74.9764	72.3554	69.2637	69.6106	9.72354	273.007	249.477	262.549	254.581	13.2553	192.75	183.222	182.297	184.16	26.4498	346.796	366.897	365.439	360.93	43.0597	2465.86	2578.79	2575.96	2509.21	77.4967	7628.15	7645.02	7633.09	7615.95	146.393	10991.5	10233.7	22398.3	21514	166.778	39692.8	24306.2
7.74679	21345	11886.2	58421.7	29.0556	47247	27017.7	142931	2.81951	4555.23	3474.29	11662.3	2.70737	54.4139	53.3159	56.9263	54.2832	6.03908	155.604	170.113	160.768	154.652	19.4824	277.972	284.148	275.473	261.874	27.0522	383.396	383.24	365.398	364.203	31.9562	1844.11	1867.68	1838.4	2005.46	62.9324	6509.9	6481.1	5976.17	5959.23	141.651	10811.4	9870.58	20463.1	21552.4	176.622	44909.1	25654.7
15.8046	43431	23798.3	119338	26.9838	43150.9	24499.7	131021	2.96453	4556.22	3495.27	12533	2.16806	45.7659	43.5307	42.2527	43.357	6.57247	172.538	179.717	169.604	178.935	18.9031	262.822	259.49	267.834	273.869	27.5889	393.968	391.912	379.596	368.98	34.6949	2052.56	2087.12	2113.77	2157.3	95.4977	9335.67	9125.54	9792.88	9035.04	137.455	9536.96	9202.49	20700.2	20730.4	160.766	41509.1	23113
12.4761	34451.3	17755.8	92629.8	21.9656	36553.5	21031.5	109254	2.55587	3883.4	3020.37	11307.9	1.16268	22.9595	24.6961	24.9568	22.9666	7.821	209.698	203.796	202.364	201.898	17.2693	248.148	240.487	247.778	253.398	22.2323	313.758	301.042	309.162	296.105	59.2702	3487.81	3430.71	3699.62	3443.44	77.6698	7743.71	7696.56	7983.76	7603.57	118.945	8514.83	7990.14	17517.6	17467.1	177.626	43946.4	26323.2
10.7052	30899.6	16325.6	83793	31.7497	51389	29047.7	149621	2.09276	3176.64	2505.24	9268.72	2.49633	48.8474	49.0729	50.7127	50.181	7.37053	195.161	192.893	190.467	190.522	15.674	226.194	214.681	231.402	219.256	20.3035	272.533	276.244	272.031	273.759	44.1229	2549.55	2582.88	2554.47	2715.39	65.5477	6325.24	6253.98	6362.49	6437.87	128.311	9689.2	9264.28	18612.3	19254.2	174.767	43079	26526.4
15.5906	43135.4	21896.8	117050	14.9836	24010	13461.7	74759.6	2.57389	4142.17	2890.98	10406	3.49163	72.1094	70.2377	71.0538	71.4081	9.6548	264.925	263.967	257.63	258.82	17.4276	242.066	244.297	245.233	237.116	24.7147	338.483	325.915	338.317	354.669	31.8604	1904.74	1877.88	1846.84	1864.23	68.1435	6471.27	6717.51	6658.78	6757.16	135.484	9682.07	9325.79	18851.7	18853	167.709	41262.5	24178
18.9085	55109.1	27343.7	145290	24.9221	37975.4	22567.1	119409	2.22467	3620.29	2701.16	9215.46	1.32871	28.3119	26.9498	27.6766	27.1876	9.77304	257.255	253.242	254.191	264.544	18.1102	250.502	252.487	263.089	262.968	22.4486	297.937	310.554	307.782	307.341	35.123	2130.18	2194.94	2122.13	2082.73	96.8659	9129.39	9848.8	9998.78	9252.56	107.202	7783.62	7465.36	15893.5	15466.3	188.537	49034.5	26224.7
19.8719	54361	28183.4	155294	18.5862	30864.6	17721.7	93082.7	2.09047	3316.22	2471.35	8390.74	4.36516	92.6126	88.5427	93.1778	90.4749	5.94848	159.095	157.045	153.503	162.722	15.5289	210.152	216.556	226.956	211.241	28.8584	381.178	408.524	401.871	391.912	32.0009	1897.6	1824.75	1898.65	1960.22	86.1813	8612.56	8663.93	8378.72	8341.06	103.962	7643.21	7490.94	14530.5	15934.1	158.53	39799.4	23672.9
14.9339	43867	21947.3	107361	17.0945	28344.3	16597.2	85958.8	2.48015	4015.36	2968.13	10248	3.85327	75.5667	78.6182	77.9783	79.9089	9.14087	249.698	246.947	249.577	248.167	15.7255	227.711	227.808	214.717	232.67	26.1593	354.849	369.298	353.753	374.627	56.1991	3279.4	3488.62	3326.93	3519.97	96.8211	10012.2	9543.96	9243.6	9437.9	135.584	9400.76	9923.12	20757.6	19151	179.833	43155.7	25153.6
17.2162	47551.9	25375.1	126994	10.1	15855.1	9970.43	47651.3	2.32303	3810.08	2699.1	9319.74	3.08904	61.4968	65.5007	61.7623	63.7365	6.5555	180.893	173.352	176.689	182.226	17.401	244.586	242.263	255.256	236.422	20.4639	294.665	271.206	274.786	285.007	39.9689	2324.82	2296.92	2457.27	2486.11	77.015	7740.97	7838.58	7333.12	7384.14	141.184	10588	9954.09	21376.8	21579.6	174.981	43706.6	26730.9
11.02	31419.6	16044.3	80465.2	24.4622	39735	23406.4	125684	2.59505	4170.28	3184.63	10907.1	4.04758	80.8243	86.7639	79.3204	80.2762	7.0219	186.405	181.037	189.933	196.615	11.0986	163.194	160.277	162.829	156.837	28.0088	370.687	393.399	395.663	389.098	59.2513	3479.56	3594.94	3415.47	3394.81	72.0296	6874.93	7349.62	7235.22	6762.45	139.539	10168.2	9967.75	19391.7	19819.8	198.87	48016.7	29510.8
19.0593	52001.2	27345.8	141535	10.3928	16885.3	10047.4	52302	2.3388	3839.51	2794.13	9504.95	3.29002	64.9257	69.2578	64.3111	69.6436	5.9446	155.872	158.312	160.796	156.987	12.5059	181.993	178.389	185.189	181.151	20.5384	286.721	295.106	295.141	278.074	45.4449	2742.12	2773.53	2769.59	2768.17	61.6607	6235.01	6144.39	6207.64	6018.58	126.556	8889.49	8553.99	18192.1	17659.2	188.355	46228.9	28892.9
15.5918	42764.7	21921.5	119077	13.8785	22063.6	12595.5	71520.8	2.40671	3801.93	2847.75	9889.5	1.66146	32.9013	33.6625	33.781	34.2114	6.30805	171.659	176.406	177.889	170.489	18.971	269.853	280.033	274.727	265.777	27.3611	368.24	370.473	388.219	372.64	39.9208	2317.94	2396.62	2478.86	2279.73	86.3063	8202.5	8739.46	8883.84	8622.36	140.409	9897.84	9935.95	19597.5	20504.7	172.121	44213.1	25884.3
8.46082	24527.7	11807.1	62205.6	31.6377	48868.9	30785.9	148004	2.38986	3941.43	2862.21	10058.8	2.26545	46.9853	46.6195	46.4372	47.3686	9.71917	263.683	271.403	257.077	263.792	17.3898	246.377	246.498	245.526	252.346	23.1051	327.956	329.593	319.055	324.836	36.5904	2102.67	2150.94	2209.76	2194.65	97.4529	9917.89	10054.8	9199.83	9414.6	131.62	9683.19	8845.69	18676.1	19913.9	193.728	48201.6	28055.9
16.1325	43552.8	23052.2	123710	33.1966	52236.8	32212.6	170643	2.44234	3774.02	2960.04	10590.3	2.11	44.0279	44.3708	42.3285	42.8378	5.59718	144.372	152.984	156.174	146.316	17.2651	234.174	237.123	254.942	250	25.4089	334.535	358.556	357.886	355.555	36.7134	2302.82	2289.65	2120.5	2291.94	87.9033	8610.47	8874.49	9046.22	8837.03	110.738	8338.84	7804.9	16339.1	15514.9	152.558	38096	22298
5.80402	16502.7	8916.47	41797.7	36.8586	60892.2	35179.9	184252	2.62791	4252.06	3084.07	10599	4.40927	91.2071	90.8339	90.7127	89.6614	9.30964	258.978	250.712	254.259	251.334	12.7169	172.049	175.318	181.04	180.038	21.3252	291.069	306.817	307.925	301.582	33.9608	2104.13	1983.48	1936.15	2062.25	60.5754	6206.66	6221.24	5772.42	6141.85	116.52	8677.9	7827.59	17719.2	17739.8	189.437	45168.9	28589.4
7.77456	21308.8	11624.2	58048.1	38.5959	64366.5	34673.3	196225	2.79725	4454.43	3195.96	11938.6	1.05693	21.7852	21.2621	22.4322	21.1904	6.02745	159.384	163.515	163.762	159.993	12.992	184.899	181.146	180.526	189.508	27.4144	367.45	379.133	365.948	381.038	49.3655	2980.49	2815.9	2854.36	2941.7	72.7408	7456.65	7083.73	7049.85	7182.76	110.335	8058.14	7786.81	16189.7	16623.1	156.335	37382.7	23150.8
16.4432	45969.7	24111	127019	22.1928	36092.9	19979.6	110352	2.13915	3347.61	2635.97	9042.02	3.93996	79.8062	82.9207	82.5733	79.3343	9.60092	256.627	256.865	262.14	252.208	10.9383	153.18	151.764	148.508	157.466	24.3101	347.511	345.325	342.463	335.184	48.927	3045.41	2849.52	2815.57	2984.55	85.2957	8436.13	8235.02	8557.26	8148.63	123.957	9169.23	9066.29	18018	17856.3	194.111	46652.7	29020.2
5.38494	14999	8157.72	38990.5	35.2063	57694.1	34017.5	168957	2.21242	3486.52	2482.59	9671.9	3.60186	75.95	77.0946	74.1151	74.0058	6.79298	180.958	182.408	178.694	186.45	17.5286	244.727	249.694	245.966	241.261	20.2815	286.041	286.698	292.777	284.114	48.1546	2988.1	2972.79	2975.54	2836.81	75.2382	7265.89	7267.15	7376.86	7402.39	104.767	7578.37	7566.93	15910.3	15461.7	173.742	44808	26102.5
6.79725	19674.3	9579.8	49504.7	15.7656	24929.8	15166.6	75451.8	2.57819	4281.57	2926.02	11113.6	4.13985	87.9435	87.9605	80.5942	80.8029	7.3338	188.014	194.642	200.691	203.162	10.1188	142.436	149.737	137.002	149.269	29.2871	396.468	398.585	406.874	418.117	57.6076	3533.42	3599.1	3336.42	3368.14	83.2127	8609.4	8596.81	8411.34	8582.38	108.327	7816.08	7285.06	16497.2	15745.9	178.679	45411.9	26178.6
10.4881	29232.1	15555.3	82895.3	24.0115	37015.3	23247.2	121907	2.21324	3543.84	2720.64	9728.5	3.23296	67.7692	66.5581	64.2994	68.3099	8.13577	221.13	224.125	216.983	211.126	16.216	228.426	231.005	224.922	222.039	24.8326	345.651	332.16	356.006	352.937	42.7084	2618.09	2548.24	2667.03	2454.05	85.2411	8736.79	8708.66	8113.27	8641.75	142.764	10890.4	9670.56	20261.3	21877.6	193.406	46604.7	28513.4
14.748	42447.8	21457.2	111865	17.3015	27055.8	16935.8	83324.6	2.85928	4741.26	3493.37	11949.2	4.97209	101.813	102.133	100.668	99.5628	8.36523	218.42	223.789	231.77	226.41	15.5885	220.934	222.047	221.083	215.302	20.4157	271.949	279.019	283.988	294.336	43.4339	2524.24	2633.83	2584.49	2480.96	67.7038	6632.15	6432.77	6407.17	6568.6	147.686	10860.7	10068	22228.4	22185.8	197.972	48431.2	30344.1
5.56139	15002.5	8068.54	40863.2	21.0535	33241.4	20632.9	98348.1	2.90515	4792.19	3443.95	12014.7	4.36813	88.3221	91.6913	91.1649	86.1683	9.83501	269.398	265.799	251.911	259.339	11.2782	151.912	159.317	156.297	160.772	29.9681	398.493	399.551	404.968	393.888	48.1232	2732.98	2984.72	2783.52	2965	77.2278	7667.61	7621.14	7293.23	7580.81	136.917	9575.27	10017.8	20339.8	20496.4	187.286	44210.2	26604.9
8.13875	23363.4	11597.1	59268.7	38.6455	59881.7	37082.5	183182	2.04375	3098.75	2444.6	8763.38	2.40658	48.2284	50.1856	51.3736	48.6408	6.40387	171.989	172.199	166.099	172.747	17.8826	257.761	243.574	254.401	258.804	25.5347	364.7	344.916	348.94	366.442	57.7537	3527.6	3374.01	3490.98	3288.65	76.1102	7392.46	7405.46	7397.37	7845.98	147.813	11168.4	10586	21722.5	22560.6	181.151	44421.3	26365.5
17.6182	48894	26697	128264	10.7489	16700	10390.4	53849.9	2.39557	3627.42	2834.11	9628.02	1.43845	28.8051	29.4153	29.8561	29.0325	6.61641	171.61	182.154	174.751	182.659	12.4321	184.338	173.218	169.44	181.612	22.3916	298.551	294.029	295.392	321.755	44.4491	2769.01	2525.09	2535.23	2534.47	81.2017	8365.35	8006.91	8328.99	8379.34	113.568	7868.53	8348.35	16476.7	17313.9	177.381	44604.6	26109.6
17.3364	49349.6	24685.2	134562	9.36934	15226.7	8901.52	46871.6	2.69022	4321.99	3005.04	11046.4	1.15017	22.7012	22.7628	23.9503	22.8157	8.64077	243.603	225.026	241.889	238.287	19.9566	287.794	278.387	287.454	271.951	20.7773	282.22	293.74	288.584	289.126	43.1156	2545.5	2700.21	2504.94	2655.89	89.0292	9147.54	8957.52	8676.45	9088.54	146.657	10157.9	10146.2	21913	21769.2	150.672	36188.1	21587.6
15.2559	42110.7	23380.4	110363	32.7987	53183.2	29440.4	162279	2.49264	4039.54	2807.98	10461.7	2.87756	58.3416	59.9799	57.0256	58.7368	5.41743	144.701	153.02	152.075	144.542	13.6071	196.955	184.903	192.543	192.997	25.4283	357.503	343.499	353.991	349.535	58.6032	3646.44	3483.44	3567.73	3657.44	93.8062	9608.74	9662.96	9447.44	9418.68	101.843	7470.13	6906.31	15006.5	14500.2	163.673	42532.3	23882.7
13.9401	39728.7	21266.5	108324	12.6179	20003.1	11764.5	62644.9	2.86959	4568.73	3259.5	11811.2	1.8196	39.0726	38.2183	35.8744	39.0891	7.14206	188.569	183.059	196.036	183.104	15.4265	213.76	214.094	212.696	220.924	24.5829	329.694	349.644	355.19	323.404	37.4586	2173.46	2172.08	2305.74	2128.13	77.5665	7852.25	7503.36	7315.97	7406.37	131.234	9686.22	9104.45	20015.9	18981.4	192.02	49547.6	27876.6
18.7806	50365.8	27134.3	135502	22.7126	35902.3	20332.6	106041	2.48604	3894.8	2978.69	10325.1	4.13635	84.9613	81.5231	88.4041	81.7316	6.37355	171.751	163.089	168.473	171.519	12.9262	183.951	176.73	176.277	174.16	23.7587	311.498	341.448	330.475	342.265	54.4125	3317.57	3358.27	3227.31	3142.79	68.9557	7146.7	6665.92	6870.38	6992.21	121.648	8722.17	8388.06	17854.3	17702.1	174.006	41138.9	25386.2
9.91157	29042.4	13853.9	72588.5	13.2753	20864.3	13101.4	63462.9	2.05366	3112.06	2452.99	8339.32	3.09919	61.5105	61.2995	66.1138	60.8885	9.70676	250.963	271.57	261.072	266.19	11.636	168.465	167.269	163.82	166.927	22.1863	317.666	292.076	308.529	298.24	42.2354	2628.81	2450.52	2428.62	2620.48	66.1995	6352.03	6639.39	6590.86	6589.02	146.228	10288	10303.4	21093.7	21595.9	152.204	38670.8	21940
7.14896	19367.8	10470.8	54232.6	15.348	24061.6	14832.7	71830.1	2.75831	4227.76	3297.73	11647.5	1.2184	26.1305	23.9616	25.6873	24.1168	8.78145	225.708	234.743	234.603	235.661	17.0856	243.477	230.156	235.832	240.114	26.0426	351.467	353.419	376.161	362.497	56.3733	3214.51	3224.22	3465.47	3349.18	67.2372	6645.55	6801.18	6973.18	6577.4	141.402	9958.54	10271.4	20299.5	19651.1	174.985	41672.1	24857.6
18.0316	52266.7	27102.3	138237	13.2157	22154.1	11981.5	63956.6	2.54375	4026.98	3026.91	11171.1	4.56187	95.5262	93.3848	90.0983	90.9889	8.1561	222.23	218.772	208.689	223.262	15.7043	220.425	217.201	214.159	219.317	25.7306	355.646	344.791	354.837	358.986	37.6729	2265.09	2281.54	2210.63	2224.44	87.7819	8747.7	8788.49	9009.78	8485.37	104.001	7730.71	7558.23	15396.9	14666.2	154.347	37952.1	21639.1
19.9727	58157.1	29639.4	147543	28.8892	44278.5	27271.4	143180	2.3577	3702.99	2847.13	9521.57	4.3853	86.6062	87.0408	86.0787	89.6996	7.67203	208.744	210.31	211.337	199.403	15.7045	218.065	215.834	217.894	231.312	27.4285	378.139	396.518	375.827	366.516	39.6366	2353.77	2254.07	2460.46	2364.44	65.3585	6666.86	6696.2	6528.19	6554.31	143.463	9940.23	10250.1	21923	20135.8	164.008	39697.5	24021.6
11.1904	30833.7	17156.1	83650	11.8637	18542.7	11598.3	59836.7	2.76669	4453.82	3372.55	11367.5	3.9788	78.6228	78.212	82.2987	85.1524	5.97684	155.854	153.514	165.699	161.797	19.1494	279.363	271.012	260.554	261.768	26.2628	367.367	364.775	357.165	365.292	32.2239	1889.86	1885.04	1949.18	1941.89	75.9446	7248.47	7197.69	7212.62	7854.71	133.704	9796.13	9449.7	18966.2	19858.6	172.159	43068.7	24514.2
19.1881	53257.9	27424.7	147125	31.5915	49535.3	28803	159049	2.43706	4021.77	2779.5	10073.1	3.67086	78.422	75.7025	74.5491	71.7086	6.00301	158.982	156.296	156.291	168.164	14.5481	209.208	197.671	214.684	207.63	28.706	401.437	410.926	412.184	406.867	30.5699	1860.88	1916.19	1817.4	1802.73	99.8275	9544.58	9506.61	10227.9	10261.3	120.178	8823.56	8518.88	18359.7	17983.2	188.584	48658.1	26726.2
17.7399	51644	25226.9	135690	15.237	25572.9	14596.8	74627	2.77856	4551.86	3366.16	11260.1	1.52737	31.3515	30.9501	32.5939	30.2711	5.19709	141.803	134.661	146.213	142.508	16.6241	226.16	224.037	233.537	245.988	23.9259	335.246	336.071	328.649	333.124	48.1336	2936.44	2953.71	2897.37	2815.68	96.0737	9966.15	9543.15	9193.32	9860.28	107.229	8064.06	7511.36	15755.7	15715.8	177.49	43263.9	26666.8
12.3324	33999.4	18532.5	96343.5	19.2541	30198.9	18960.8	92132.4	2.32281	3760.13	2784.94	9594.9	3.2808	66.3938	65.6377	65.5327	65.6844	7.03439	184.143	192.015	186.074	188.722	18.7595	267.422	271.469	275.734	256.58	20.2202	291.854	280.119	268.554	283.314	40.6504	2431.86	2454.26	2518.44	2461.06	79.1567	8131.28	8087.47	7973.06	8093.16	104.156	7742.26	6961.34	14908	15350.8	191.242	45346.4	27471.9
15.9938	46864.6	23935.8	119753	21.7462	36448	19457.8	101680	2.45646	3898.61	2778.25	10494.8	4.26142	84.1159	90.2175	84.1931	90.2414	5.3327	150.345	145.837	142.092	144.609	11.3174	157.463	167.856	159.18	161.176	22.7662	308.366	313.17	305.817	314.136	36.4957	2282.42	2126.8	2218.76	2151.15	93.0186	9489.53	9648.5	9478.51	9476.74	128.974	9853.3	8857.7	19419.8	17974.3	162.463	39365	24467.7
17.812	51241.4	26657.5	135059	9.63594	15201.2	9347.56	45374.3	2.68831	4178.27	3029.46	11385.6	2.03956	41.9297	40.2123	42.1429	40.7684	6.6757	176.776	186.069	175.075	180.666	11.7427	173.082	169.249	160.026	163.206	25.0252	334.808	334.999	328.992	336.812	40.4335	2383.18	2421.81	2322.22	2526.61	89.5665	8647.84	8595.05	9256.51	8894.23	125.364	9261.85	8598.38	18853.6	18205.3	186.224	44448	25915.5
11.6084	31959.6	17474.2	85611.3	21.3762	35536.5	19580.1	109305	2.40475	3677.85	2700.5	10002.6	3.29284	68.3468	64.1093	69.7688	69.6179	9.39499	261.61	244.48	243.857	246.852	17.5978	254.718	258.607	253.8	238.015	24.0084	328.568	325.765	320.181	335.493	38.0943	2242.43	2204.12	2185.95	2277.53	67.9974	6556.45	7019.86	7034.32	6639.93	107.861	8084.31	7728.33	15780.6	16404.9	178.509	45585.3	25695.5
5.97043	16483	8951.15	45878.9	11.8902	19330.3	11239.9	56270.1	2.92773	4576.23	3483.94	12298.5	3.87697	78.2104	83.3184	83.3838	80.5347	7.41099	202.506	191.145	202.717	198.929	12.4954	179.424	172.697	179.955	176.626	29.8507	425.059	421.203	414.386	415.199	58.6946	3556.93	3338.53	3653.76	3366.78	83.5228	8402.54	8212.52	8342.67	8021.61	114.569	8436.74	7713.53	16811.1	17575.9	185.12	47938.2	26279.1
17.0203	46717.8	24240	126815	36.5838	56954.3	35260.9	177694	2.66211	4228.38	3233.54	11743.1	4.59448	93.4207	94.1779	91.9892	92.8728	5.92529	164.49	158.749	164.595	159.608	13.4725	188.426	184.199	184.552	183.021	28.3493	372.975	388.428	394.057	402.135	43.0289	2563.34	2489.16	2545.76	2459.59	91.161	9232.01	9116.52	9130.43	8632.09	123.649	8650.25	8382.51	17509.3	17688	181.029	47089.9	25992.4
7.45646	21714	10575.5	57319	26.3952	42976.2	25890.1	125215	2.5064	4016.54	2846.79	10488.8	1.89447	37.6344	39.363	40.7083	37.1583	5.82137	163.335	162.077	162.853	163.258	19.9996	294.686	270.025	276.638	295.162	23.141	321.283	318.202	317.198	307.489	35.8776	2102.32	2095.39	2081.72	2105.2	73.7709	7563.15	7641.26	7210.3	7644.61	136.518	9474.98	9416.94	20159.7	19372.9	165.076	41242.2	23396
18.2467	52516.8	25956.7	135550	13.9769	22274.4	13524.8	66902.6	2.45728	4079.34	2792.52	10515.5	2.62202	55.3541	54.5387	51.3282	52.5453	8.66455	227.617	222.727	228.213	227.677	18.3763	272.427	263	264.511	261.974	24.8048	342.66	324.73	333.644	329.804	49.6928	3094.46	3058.51	3080.3	3085.58	73.8787	7509.52	7489.25	7481.02	7102.88	100.062	7028.16	7276.12	14431.3	14384.1	157.595	37273.9	22780.1
18.2066	51897.7	26815.6	133435	9.93404	15318.9	9772.06	46608.8	2.00767	3089.66	2251.69	8352.07	4.98014	102.974	105.433	101.312	100.431	5.16533	133.508	140.278	132.224	143.964	14.6935	201.955	200.886	216.228	213.103	21.2832	279.801	296.613	292.427	284.721	30.6364	1797.82	1905.44	1905.83	1900.23	87.4991	8962.44	9040.16	9001.12	8797.82	107.62	7978.76	7432.76	16085.3	15156.8	178.076	42049.2	25546.8
5.94258	16990.5	8902.17	43708.1	17.0513	26205.2	15871.2	86165.5	2.72584	4433.91	3316.31	12016.7	3.87173	79.5038	81.492	78.3911	76.4766	8.47649	235.096	221.403	238.828	225.277	13.0809	189.674	176.694	179.697	183.251	27.1987	376.354	377.255	378.912	368.511	56.0157	3487.62	3188.05	3410.24	3223.77	69.0592	6727.1	7014.12	6736.83	6742.34	140.757	10483.3	9974.92	21407.8	19918.7	162.571	41350.7	22738.9
10.8087	30037.7	15170.9	77976.1	13.3308	20895.3	12925.8	62705.4	2.77699	4577.49	3166	11566.1	4.34509	85.1688	85.7938	88.5625	88.0859	8.63364	233.75	235.681	224.879	227.836	12.2375	175.674	168.667	167.578	165.167	21.2135	300.907	280.07	291.251	282.569	39.0891	2221.74	2319.98	2323.16	2300.41	75.9122	7297.82	7650.67	7826.58	7380.54	105.416	7921.35	7109.57	15277.9	15708.2	154.803	40158.2	21690.4
18.2475	49083.5	28000.9	136681	19.9757	30643.1	18649.9	98392.1	2.75084	4527.49	3158.39	11103.7	2.27387	47.7089	48.2915	48.8993	44.2912	9.89225	266.474	255.394	276.411	269.679	18.8437	255.119	274.67	259.988	268.795	26.4528	346.398	369.565	355.531	360.467	52.9102	3090.5	3085.79	3299.75	3161.37	69.1487	7132.21	6540.85	7055.36	7167.13	139.226	10537.7	10055.8	20516.8	20912.4	199.483	50580.2	29572.8
14.3558	40990.3	20318.6	110913	36.0041	56768.3	33683.7	182210	2.20634	3558.28	2615.94	9314.75	2.96942	63.271	62.5743	59.8658	63.2808	6.25281	170.302	166.432	173.576	161.989	13.7424	189.23	194.975	188.581	202.299	22.1853	297.366	305.089	301.442	310.252	36.6207	2269.95	2099.27	2110.42	2096.85	83.1445	8170.28	8014.21	8359.44	8252.32	128.712	9093	8645.87	19238.6	18670.3	189.934	45165.6	29134.6
15.9719	45098.7	22791.7	118115	12.7467	20702.9	11423.9	63404.7	2.05091	3248.38	2402.93	8765.06	4.33875	84.5299	90.0392	85.5174	89.1241	9.52343	257.721	259.141	245.733	266.976	13.8216	197.928	192.296	194.016	200.694	23.9056	343.967	320.893	329.597	322.535	31.769	1981.19	1825.15	1907.72	1878.52	77.5409	8004.19	7901.28	7462.7	7622.86	131.735	10014.2	8771.64	19747.9	18884.3	150.188	38716.9	21644.2
8.60531	24208.7	12717.1	65487.2	30.2298	46876.5	29211.5	149085	2.30878	3780.27	2731.83	9353.39	1.30378	27.6632	25.9088	26.4382	28.0308	6.68432	177.663	173.273	171.794	178.946	19.9587	280.061	288.058	285.618	292.645	25.7357	371.331	341.871	352.291	371.62	43.0359	2517.62	2546.4	2584.44	2521.85	98.8164	9464.14	9484.95	9835.2	10235.6	132.28	10099.7	9049.34	19056.9	19629.7	165.68	41409.1	25315.5
9.09422	24428.2	13716.1	65356.8	25.7546	43139.7	24838	125425	2.68948	4377.64	3045.74	11027	1.58852	31.2916	30.9584	32.2099	32.6871	9.56552	260.285	258.062	248.133	256.778	13.5349	183.822	183.135	184.085	182.548	23.8618	341.792	328.341	336.085	341.086	31.317	1870.42	1833.38	1851.83	1829.84	93.3554	8999.97	9090.96	9177.96	9151.33	126.667	9611.9	9259.55	18145.3	18564.4	196.923	47723.7	27595.7
11.9866	33219.2	18346.6	90603.7	9.53247	14915.7	8718.33	47252.4	2.28302	3708.89	2691.18	9762	2.8096	55.3923	57.4827	56.7394	55.505	7.0463	196.745	191.646	197.359	191.027	12.5678	173.294	181.99	173.848	178.862	27.547	396.814	385.201	375.748	392.957	32.938	1976.05	1947.85	2029.01	2065.53	75.4572	7334.55	7242.98	7687.56	7587.3	146.518	10519.7	10554.6	20893.8	21210.4	167.185	40193.1	23926
17.514	47387.5	25343.9	129862	13.0615	21271.4	11703.8	63684	2.22282	3476.37	2667.93	9422.51	1.84832	37.7233	36.5437	38.6289	37.064	6.48854	179.584	179.833	181.954	178.87	14.3631	207.278	203.02	195.942	209.565	24.0463	335.1	326.199	339.581	323.763	45.9422	2803.63	2783.15	2721.52	2841.1	94.4861	9077.09	9343.33	9627.96	9784.01	143.691	10779.8	9966.15	21945	21355.6	174.203	44851.7	25924.4
17.4186	48534	26374.6	136831	11.9868	18810.7	11720.5	59565.3	2.46185	4081.67	2994.03	10630	3.21498	64.9741	67.8889	66.1103	63.9147	7.15736	201.197	183.003	187.911	188.269	18.7927	269.317	270.028	278.657	258.512	23.1105	315.777	323.497	321.579	331.476	58.439	3392.08	3395.5	3339.08	3519.95	66.173	6248.13	6814.64	6660.84	6451.42	111.203	7985.32	8086.39	15630.1	16014.1	196.579	49698.1	27539.4
19.7889	55129.3	28228.6	151036	10.7582	16904.7	9923.55	51340.8	2.75556	4530.87	3353.85	11934.3	4.90462	104.161	100.336	104.015	100.882	5.30069	141.182	141.065	135.707	145.878	16.702	242.196	231.045	244.129	246.601	20.4329	286.264	269.368	291.806	291.277	37.8452	2207.32	2181.34	2150.46	2203.63	95.3404	9055.86	9806.6	9233.83	9817.39	123.831	8586.68	9080.54	17436.5	17772.3	159.801	40126.3	22815.4
17.6537	51461.7	26982.7	129244	29.2722	45262.4	26855.7	140163	2.26343	3602.96	2788.43	9683.21	1.65607	35.0832	32.2305	34.8477	33.9937	6.8343	177.612	175.156	177.908	191.891	17.6589	254.634	249.766	250.8	257.919	23.6475	341.628	317.968	329.359	312.495	33.1451	1935.19	2013.24	1975.88	2050.29	81.4056	7692.5	8060.11	7860.13	8409.02	125.754	9181.82	8403.49	18271.7	19162.8	156.056	40334.9	22750.7
15.9778	43224	23913.2	117788	20.4887	33045.8	20084	102367	2.81049	4634.21	3335.52	12377.9	1.82328	36.4366	35.8498	36.576	37.3892	7.46617	192.941	199.495	203.027	204.432	16.5874	231.238	229.27	240.738	235.464	28.7812	415.93	379.297	399.172	405.734	42.2149	2408.12	2582.38	2496.77	2536.78	74.9076	7196.56	7248.79	7757.91	7340.01	133.44	9679.98	9526.52	20467.7	20034.9	161.982	38783.3	22509
8.59871	23830.1	13003.9	62544.9	37.5104	59418.8	36569.8	192745	2.02343	3183.74	2269.76	8811.62	1.9496	41.0501	39.2584	40.6437	38.0165	8.95336	235.594	250.495	246.41	246.723	16.268	238.745	220.281	234.214	232.158	28.5496	393.477	392.853	381.944	385.614	46.1919	2628.12	2723.09	2877.84	2862.87	99.1811	9918.97	9367.71	9962.11	10024.4	100.272	7227.41	6858.56	15073.2	15036.9	191.603	45570.4	28008.8
6.80735	18753.4	10153.1	53592.1	22.264	35654.4	21302.4	110245	2.05001	3368.38	2393.34	8377.48	1.43144	29.3255	28.6163	29.0357	30.7227	6.78087	180.181	177.018	183.24	181.525	16.7491	241.756	231.93	246.838	234.982	20.4839	279.062	292.096	283.383	294.678	36.4157	2272.13	2181.47	2214.2	2251.59	63.5399	6316.36	6546.32	6095.23	6334.02	100.751	7360.87	6790.11	15284.9	15048.4	171.259	43625.7	26157
10.95	29272.5	15690.9	79443.7	31.2426	52400.8	28223.7	157894	2.50463	4075.97	2814.71	10815.3	3.93026	82.618	79.7697	76.6715	79.2147	8.87092	247.882	235.014	229.029	230.872	10.0825	142.089	135.511	141.424	147.31	27.2406	359.225	365.418	372.866	366.181	37.386	2304.85	2161.92	2131.98	2242.73	84.4206	7991.44	8430.09	8274.53	8115.57	119.446	8857	8717.4	16904.1	17652.8	160.043	39538.5	23205.8
6.10873	17669.9	8735.78	46685.1	21.5548	35263.7	20394	106781	2.59519	4224.47	3059.52	10664.9	2.11489	43.6557	44.6512	43.7371	43.0623	6.62678	172.16	184.06	186.299	169.418	11.0648	160.9	154.638	156.507	162.158	28.5637	391.977	380.789	398.112	374.454	42.3633	2567.88	2566.23	2495.47	2424.78	85.9306	8093.16	8640.71	8749.01	8195.56	131.398	9539.76	9386.05	18576.3	19830.7	183.224	44103.4	27244.1
16.3082	43772	24365.5	122078	10.7625	16575.5	9711.68	53543.1	2.21637	3416.07	2475.3	9388.94	4.06322	80.3341	79.4985	84.5623	84.4853	8.61875	223.297	235.272	236.147	228.453	15.1501	206.652	207.34	210.181	224.939	23.2276	316.673	335.27	331.169	310.605	48.1072	2996.53	2963.41	2738.24	2823.01	72.302	6937.42	6965.54	6928.78	7157.09	129.362	9493.46	8864.72	19706.5	19408.7	175.229	42852.1	25387
9.96902	27128	14147.7	71521.3	22.6297	35309.8	21987.5	107686	2.2057	3642.51	2483.68	8930.95	3.42362	71.0454	70.6315	70.2573	72.7476	7.40849	198.305	196.703	190.667	197.799	19.1689	262.345	273.58	272.061	276.392	27.5726	370.8	367.054	385.3	379.44	41.832	2522.33	2526.03	2611.62	2533.9	84.0164	8134.12	8703.85	8052.99	8345.85	107.887	7985.13	7466.63	15048.3	15337.3	178.027	42024.7	26714.5
11.0158	31873.4	16633.7	86957.1	16.2473	25720.3	14868.9	83345.5	2.30115	3758.69	2630.35	9868.04	1.37785	29.1812	27.6111	29.2159	29.285	8.57816	228.333	235.905	237.663	241.603	15.6969	214.043	226.395	223.692	212.623	24.3521	336.977	333.519	327.027	338.466	42.4056	2500.24	2541.69	2440.05	2557.09	81.4852	7936.17	8020.22	7966.49	7848.21	106.652	7536.06	7462.92	15751.8	15799.9	166.424	42858.2	25435.8
5.21614	15294.4	7701.49	37685.9	22.2761	34186.8	21301.6	109234	2.26609	3576.98	2585.87	9705.04	3.90167	78.4525	76.8074	80.6039	83.4376	5.03716	140.073	141.826	133.311	135.083	10.8688	148.108	152.91	155.208	159.195	24.0324	333.733	322.742	340.292	321.716	44.0745	2716.19	2637.63	2667.51	2672.37	74.8729	7590.04	7555.23	7402.55	7031.68	122.987	9343.75	8228.08	17355.1	17351.8	188.073	45658.2	27323.8
13.9787	38969.2	20161.3	108656	12.932	21414.9	12084	62254.9	2.75967	4229.95	3262.11	12118.5	1.02024	20.5356	21.4619	20.9662	21.4428	8.9554	242.694	229.167	241.431	248.896	15.8342	219.334	221.754	234.514	232.939	20.9582	277.45	284.591	284.579	295.179	39.3255	2293.83	2429.43	2427.62	2248.99	99.3138	9791.34	9857.26	9640.75	9615.9	118.743	8945.18	8485.48	16942.3	17683.2	154.186	40144.1	22263.7
7.5594	21351.7	11484.2	57730.4	19.5379	30583.7	17701.4	99451.6	2.42039	3993.21	2779.32	10060.5	2.28417	47.8124	47.6936	45.6943	45.232	9.85396	276.147	273.071	266.853	261.541	16.8194	237.644	234.048	235.652	230.264	28.7556	388.301	380.108	380.902	390.428	41.5562	2454.97	2487.09	2392.54	2581.29	82.3457	7886.66	7889.63	8164.86	8133.13	144.505	10121.7	10407.4	21359.7	20250.1	161.585	41678.8	22900
8.34871	22795.6	11747.6	64467.9	31.5423	48306.6	29775.9	147560	2.47779	3893.77	2790.28	10646.4	3.75457	80.7183	79.3559	77.0783	79.1263	5.39713	140.293	147.212	151.691	145.933	15.0366	204.78	222.843	208.808	210.386	27.0003	379.832	383.604	387.237	374.734	47.7899	2752.82	2719.78	2894.45	2923.55	65.1533	6420.62	6233.61	6133.56	6243.4	106.823	7785.47	7335.9	16296.8	14957.8	158.049	38488	22676.2
13.0873	35297.7	19815.9	95497.4	17.8794	29478	17455	85073.9	2.19468	3331.76	2660.92	9299.62	2.27844	46.1476	46.4325	47.7248	45.8875	8.77988	231.655	224.571	243.723	230.544	19.3175	280.452	272.303	273.406	286.21	29.0308	403.555	409.445	407.007	380.623	48.5757	2893.63	2885.71	2778.81	2831.14	63.1587	6162.13	6038.55	5986.66	6002.91	123.154	9415.33	8523.15	18680.2	18346.2	155.403	38357.4	23619.6
10.3055	27999	14790.5	76353.4	29.4009	47010.4	28257.6	146501	2.3751	3850.61	2773.62	10273.9	2.73198	56.6128	54.0727	55.316	56.9631	7.27609	201.499	189.522	190.538	197.619	13.9845	206.827	188.128	193.227	190.747	26.1381	349.232	354.218	364.249	375.575	49.5405	2955.74	3031.78	3002.57	2888.02	92.2753	9429.83	9231.5	9495.03	9505.04	109.95	7782.35	7744.96	16505.9	15497.4	170.293	42398.7	23838.5
14.2244	38202.2	20439.3	102886	38.7891	61051.5	36651.3	192758	2.38245	3882.82	2824.69	9966.37	1.56157	30.7142	32.7293	30.5122	30.7213	6.17339	165.947	165.538	161.44	168.682	17.874	249.038	259.79	247.516	241.54	23.5332	335.677	338.68	335.895	337.059	58.282	3596.19	3453.54	3451.41	3535.51	84.9627	8682.16	8204.91	8106.18	8073.66	137.775	9600.54	9992.57	20753.6	19157.4	177.602	41991.7	25603.3
15.6423	44929.8	21823.6	114808	9.05505	13836	8523.03	44415.1	2.84408	4365.41	3328.18	12536.9	1.08309	22.9783	23.0094	21.3422	22.2853	6.39421	165.108	176.652	178.063	178.954	16.475	237.985	237.522	223.978	221.547	27.8073	364.246	386.04	377.745	365.899	33.6236	2084.77	2108.88	2005.36	1940.38	99.7931	9936.91	10127.1	9887.48	9722.62	108.226	8203.22	7387.65	15285.6	15473.3	157.419	38292	23674.6
12.8416	35344.8	18207.5	97241	38.1961	59259.4	36165.7	184255	2.18935	3563.63	2629.22	8929.72	1.18005	24.5242	23.1949	24.5853	24.87	5.78773	161.968	149.518	150.91	151.806	10.6852	152.297	143.919	144.809	150.245	24.4755	334.465	324.102	329.352	321.555	46.6534	2704.45	2658.66	2853.93	2742.7	76.8262	7815.81	7865.86	7898.68	7914.15	121.662	8602.15	8124.29	17349	17465.2	156.245	40478.8	22569.4
5.11948	14851	7292.31	38169.3	9.48962	15456.8	9300.82	48382.6	2.08906	3285.12	2565.18	8495.37	3.59882	76.0143	74.0531	76.6687	72.0117	5.82904	158.117	159.885	149.453	152.798	17.1566	235.876	233.169	231.795	249.144	21.235	298.614	303.15	294.655	291.658	52.233	3219.1	3108.67	2969.51	3006.12	67.9343	6377.9	6702.89	6842.42	6576.78	142.345	10650.8	9980.01	19937.4	19867	168.417	43519	25771.7
16.2759	45833	23915.1	122256	38.6306	60735.6	37908.2	184477	2.06394	3168.05	2520.11	8871.52	2.82986	58.2024	55.4038	58.3482	57.9941	7.98804	210.609	216.922	218.45	206.209	16.9491	242.604	239.848	239.445	237.936	28.7636	378.997	401.753	409.938	403.966	55.4656	3227.32	3299.37	3420.95	3333.05	95.093	9345.77	9365.38	9828.35	9678.98	105.227	7446.48	7332.03	16105.5	15435.1	153.543	38692.3	23018.9
10.5452	30670.3	16223.6	81561.7	38.9866	64816.9	37267	183343	2.80203	4411.72	3312.04	12361.2	3.1522	61.6479	63.4958	67.5551	62.1139	7.70064	200.879	202.568	216.847	213.313	17.4103	240.037	245.296	245.379	242.074	24.8953	343.858	334.537	338.171	346.019	46.3571	2759.67	2660.8	2685.35	2740.43	96.1563	9440.94	9286.05	9558.09	9679.6	130.942	9614.21	9468.98	18442.3	18949.7	156.491	37463.1	23955.2
6.88447	19095.4	9600.97	51604.4	36.5715	55956	34854.3	184653	2.71384	4516.15	3318.32	10933.4	3.88431	80.1046	82.7446	79.7378	83.2606	5.83264	153.726	158.42	164.224	162.429	15.5931	213.356	219.718	213.978	212.304	26.5195	382.579	379.788	371.281	365.709	45.5247	2669.02	2725.59	2854.11	2763.1	93.8925	8855.29	9704.51	9024.35	9316.97	134.743	9341.33	9301.18	19603.2	20555.7	187.277	45479.8	26872.8
14.3275	41612.6	21476.7	106527	10.5979	17030.6	9943.6	52833.1	2.90949	4824.74	3271.7	12369.8	3.47674	71.4334	67.7416	67.6629	71.6067	7.17241	191.308	192.527	191.022	193.586	10.9061	152.218	159.263	159.774	154.58	23.2307	334.976	319.304	315.976	304.316	59.8982	3659.81	3516.4	3668.12	3663.31	92.8948	9359.34	9189.1	9282.67	8935.11	109.269	8307.58	7542.95	16460.6	16472.8	189.705	47974.2	28834.7
11.8895	32929.8	17457	85144.9	19.0636	29995.2	18632.4	89746.2	2.95641	4849.36	3338.65	12693	4.60777	95.8799	93.7522	97.8337	97.4029	7.77429	199.244	214.477	202.238	211.083	14.3241	199.976	212.326	207.52	210.772	22.8007	311.339	314.968	319.926	316.517	54.4581	3119.33	3120.92	3405.54	3290.99	96.4946	9869.02	9393.24	9423.75	9099.28	121.282	8548.2	8852.88	18621.9	18598.8	182.322	46353.1	25757.7
12.9004	37080.1	18598.4	94223.5	14.5034	22543.2	13371.9	70183.8	2.34502	3639.38	2755.95	9628.72	1.60135	31.6336	32.7633	33.9649	33.979	5.93709	165.734	153.777	154.86	162.17	13.2812	178.9	182.908	184.52	181.873	22.6654	310.483	318.908	319.608	324.913	54.381	3202.25	3192.49	3237.06	3277.4	71.6984	7004.85	7002.91	7092.79	6890.65	134.4	9501.45	9300.49	20047	19530.7	187.309	47355.9	28019.9
11.075	31347.6	15753.8	86043.6	24.6306	40817.5	23244.9	118635	2.35226	3851.82	2813.8	9780.67	2.22073	46.0788	45.7018	44.8606	47.3054	9.24905	240.093	253.467	237.466	250.224	12.0618	162.703	173.968	177.015	172.424	21.1916	300.919	295.626	296.709	282.061	36.3166	2116.17	2079.66	2189.12	2121.21	84.5326	8392.37	8374.75	8552.91	8063.64	122.643	8996.33	8834.33	18225.4	17083.8	182.531	47050.1	25944.5
15.7304	45135.2	23354.8	117113	17.3566	29101.4	17155.9	89382	2.0376	3345.29	2410.52	8899.8	1.11637	23.4076	22.1067	22.5407	23.7565	6.78998	187.872	184.911	188.896	174.738	15.6907	211.122	216.837	227.242	222.89	28.5699	388.433	399.737	398.882	390.334	46.4808	2868.29	2814.84	2714.58	2694.39	86.0452	8292.4	8356.43	8102.42	8860.32	140.955	10768.4	10327.3	20106.2	19644.5	199.359	51258.5	28567.2
16.2703	44758.9	24737.8	123207	18.6191	29295.8	18066.4	92101.5	2.77116	4277.11	3224.16	12150.8	3.89337	77.2311	81.6144	80.6887	78.2648	9.2586	246.784	261.576	242.8	253.442	18.9594	260.336	275.916	273.253	267.709	24.283	327.931	346.301	345.507	328.239	46.0845	2617.92	2866.84	2741.94	2624.33	97.9652	10029.8	10031.8	10133.6	9899.73	139.455	10293.9	9907.38	20290.2	19777.4	182.969	46647.9	27785.4
18.9311	51491.1	28442	140298	17.2764	27288.1	16121.5	86117.6	2.79212	4641.47	3424.02	12269.8	1.89994	38.1586	40.7327	39.7771	38.3058	6.40502	174.6	165.569	164.31	172.104	11.36	160.12	160.936	161.911	154.702	26.9884	382.722	388.337	385.488	362.878	48.1858	2746.2	2996.57	2782.42	2920.78	97.0295	9625.02	9880.51	9499.39	9829.51	114.81	8775.8	8028.18	16622.6	16221.1	162.168	41090.5	23853.2
13.7031	39698.5	20184.5	99794.7	13.3151	21705	12938.4	62909.4	2.32929	3718.22	2742.36	10173	4.46002	88.5357	95.4846	88.8574	94.8444	8.16333	222.233	214.279	220.945	215.166	11.6347	164.743	162.396	160.158	172.547	27.0362	367.116	366.558	371.801	360.038	51.812	3215.14	3229.57	3018.37	3132.73	91.0145	8766.41	9114.25	9137.31	8676.84	101.432	7203.74	6840.24	14738.3	14559.8	179.623	42463	26398.4
8.18365	23088.5	12112.8	61394.9	23.3842	36676.7	22954.9	109346	2.70746	4482.64	3139.18	11788.2	2.68398	52.43	55.3549	55.9752	52.9381	5.92142	157.196	158.895	163.699	165.199	18.7875	272.001	269.578	262.343	261.169	20.4795	291.278	272.745	287.301	296.202	38.8508	2413.46	2357.41	2343.02	2305.89	74.8321	7218.69	7673.58	7692.63	7571.59	126.296	9654.5	8476.97	18487.4	18339.7	194.078	48942.5	29750.8
14.3794	41460	21431.4	105010	9.91035	16060.3	9017.05	50173.2	2.09678	3160.77	2364.1	8600.84	2.0434	41.8369	40.1779	42.0825	42.8112	6.91268	180.329	184.915	191.72	193.294	14.8688	215.574	208.525	215.924	200.659	23.8483	327.831	329.491	322.962	332.365	46.7426	2655.84	2794.13	2926.29	2723.13	69.0764	6683.91	7069.19	6900.36	6737.78	132.215	9323.92	8921.32	19774.5	20133	192.909	49324.6	26952.1
16.9506	45936.7	25605.1	123578	11.7767	18522.1	11576.2	57905.1	2.86489	4503.62	3273.44	12490.8	2.52894	51.3918	50.1853	49.7944	51.3643	9.03545	250.274	251.351	245.622	238.257	16.5395	238.709	225.366	222.995	236.038	29.6596	421.442	425.662	406.494	389.784	40.7004	2408.18	2459.2	2431.01	2430.34	75.7758	7501.95	7171.71	7658.14	7660.73	129.452	9097	9440.58	18877.4	18973.4	161.011	38932.9	23438
14.8936	40454.6	22659.4	107417	29.7808	47437.4	28666.6	140888	2.46637	3823.36	2966.82	10381.2	4.67337	96.4098	98.3067	92.016	95.6035	6.09936	162.935	157.109	169.509	156.649	12.4861	181.019	170.581	179.395	178.055	26.7392	369.366	372.463	352.835	352.487	51.2583	2964.9	3127.14	2990.34	3187.8	84.9935	7988.45	8577.54	8024.72	8358.91	111.121	7797.66	7840.14	16146	16200.9	166.399	42535.5	25214.1
9.01564	24315.9	13683.4	64983.2	33.921	54021.9	31703.4	165311	2.99455	4684.42	3403.62	12989.1	2.6382	54.0794	51.7413	52.9964	53.3735	9.96937	274.367	268.36	280.243	272.729	10.882	158.2	146.951	150.059	151.492	21.6901	307.387	285.532	309.538	306.035	44.1085	2611.74	2743.33	2645.53	2635.97	73.8704	7485.19	7580.95	7221.92	7541.41	133.372	9653.52	9238.11	20082.3	19091.4	183.183	44334.4	26225.6
9.05686	24773.6	12769.9	69161.3	34.534	53212.9	33850.2	169949	2.52807	4081.69	3070.53	10942.3	3.2069	64.631	67.1979	67.9043	64.4958	8.0144	208.85	220.604	205.084	215.89	19.2574	276.582	261.784	280.494	281.729	22.261	291.765	311.702	301.923	303.891	59.3787	3634.81	3569.12	3412.23	3708.04	91.9975	8916.14	9220.93	9256.39	8773.7	115.672	8388.32	7789.39	16869.5	17726.6	199.402	50205.4	30435.2
19.4067	56142.2	27137	140782	34.9654	54357.4	33609.1	174682	2.42674	3726.96	2788.18	10570.3	4.03473	79.8506	80.432	79.875	84.4297	6.75526	173.581	187.276	179.193	181.567	19.1155	281.928	267.598	270.541	259.454	21.1311	291.016	293.934	284.573	284.72	38.1298	2253.32	2175.61	2290.38	2259.2	86.2924	8721.7	8507.5	8134.83	8310.3	123.933	9047.55	8478.9	18822.2	18449.6	178.632	42749.7	25480.5
11.4042	31907.9	16241.9	85679.9	26.6575	43467	25621.7	130702	2.92805	4686.83	3380.99	12702.1	3.92582	79.3823	82.5418	77.4632	81.6714	5.89921	158.629	156.662	159.382	156.303	15.7506	215.026	226.095	218.698	216.193	29.9027	430.702	425.56	426.159	418.337	30.9891	1834.69	1834.49	1917.66	1805.07	90.1697	8847.83	8566.87	8489.45	8936.45	136.579	9859.15	10024.1	19931.4	20227.3	185.998	46222.1	27153.7
10.3901	29521.1	15762.2	79110.1	26.9576	43638.2	24436.5	138203	2.48617	4133.77	2983.36	10528.3	2.93956	61.5335	58.8227	58.5929	62.8172	8.51611	231.394	238.306	224.936	228.329	10.582	156.858	157.046	151.88	145.509	21.6112	291.612	309.106	288.106	285.606	39.5697	2365.11	2380.06	2390.21	2455.96	61.3984	5895.3	5928.51	6165.4	5894.34	118.514	8451.44	8510.27	16498.2	17468.1	168.587	42073.9	23799
10.9896	31889.6	16263.2	84786.3	26.5828	40832.2	26105.5	135342	2.73946	4315.73	3273.27	12101.3	2.12911	41.919	41.9716	42.0466	43.6406	9.91595	261.853	269.927	269.472	277.289	10.6228	152.856	154.622	152.119	144.102	22.0477	302.247	310.712	303.938	294.928	37.4216	2162.48	2257.38	2297.98	2173.76	86.8723	8363.14	8426.21	8723.49	8358.32	145.494	10768.8	9783.31	21149.9	21758.5	177.342	45859.6	25285
9.28554	26334.6	13575.9	69613.4	11.9386	18580.8	11063.3	59478.1	2.25105	3741.9	2653.66	9197.56	1.75664	37.3241	36.8145	35.4412	36.8337	8.96991	244.354	239.834	232.142	247.408	19.1298	266.61	263.931	281.548	279.891	25.074	340.881	360.993	336.333	356.161	35.9645	2144.9	2108.64	2194.21	2071.6	94.884	8978.27	9662.39	9606.67	9012.95	115.294	8601.72	8135.56	16989	16762.3	175.586	41812.2	25084.8
16.6422	44867.9	24970	130681	23.1093	37901.1	22756.4	114916	2.42561	3673.59	2888.06	10374.8	2.74849	54.3293	57.3406	54.4203	56.4294	5.99963	157.837	153.45	155.223	166.895	15.9552	236.204	220.859	232.373	221.727	20.2405	268.085	279.352	279.948	289.793	55.0757	3331.94	3188.7	3423.87	3434.13	98.2744	9804.98	9479.54	9778.08	9953.68	140.853	10113.8	10228.2	20087.3	21399.3	155.518	40281.1	23447.9
6.03088	16998.4	9025.48	44392	27.4417	45087.8	25712.7	140967	2.87501	4548.17	3331.79	11732.6	1.59478	31.4834	31.5427	32.054	32.2096	9.83301	272.277	263.433	254.69	256.026	19.0917	269.884	269.177	271.865	258.933	27.5469	374.838	393.63	393.751	373.14	54.4808	3287.94	3186.42	3252.52	3183.84	75.6268	7371.95	7273.34	7282.14	7774.15	128.156	9116.29	8724.92	18943	19197.1	188.544	45568.5	27744.3
7.88068	22368.4	11917.8	59561.5	16.5202	25671	14928.4	78663.3	2.37542	3723.21	2842.26	10503.5	1.95488	40.452	40.901	38.9093	41.1627	5.03677	141.022	132.846	136.782	134.27	15.0458	212.537	205.275	221.933	206.408	22.571	298.576	309.392	325.896	307.267	33.7442	1995.74	2023.45	2033.41	2087.96	63.3751	5990.01	6041.47	6045.15	6399.87	149.8	10775.9	10966.7	21380	20876.6	170.539	40734.1	24753.6
7.51166	21194.6	11251.6	58236.8	30.4996	50620.5	29480.3	150402	2.8176	4610.45	3245.5	12402.8	3.41515	72.4868	68.3418	70.0305	72.554	6.09112	170.01	170.955	157.194	163.884	12.3683	183.308	179.504	174.844	182.117	28.0252	373.402	381.393	368.851	371.557	56.8493	3504.84	3382.46	3552.5	3409.42	63.2999	6132.7	5966.93	6444.52	6107.44	124.42	9350.44	8409.8	18691.2	18856.4	153.936	37039.7	23411.9
14.231	41122.4	21586.7	107097	17.7005	28070.3	16845.1	82683.1	2.3023	3481.65	2569.66	9466.66	4.5247	89.5665	88.8821	94.8161	95.0592	6.4157	169.459	166.803	171.48	170.138	14.1231	202.656	197.462	199.338	202.565	28.3009	397.702	404.12	372.116	404.02	41.5875	2412.73	2608.15	2583.13	2468.38	65.6417	6260.97	6528.51	6527.18	6664.31	123.686	9154	8235.96	18209.3	17264.3	179.102	44780.3	25582.7
18.925	52973.7	28842.9	148698	11.5047	19177.8	10424.2	57071.6	2.54902	4183.45	3001.61	10867.6	4.89476	98.4441	103.625	102.297	104.428	8.99319	241.257	239.871	248.463	235.806	16.5545	244.517	225.786	224.253	231.949	20.7442	285.315	285.758	294.303	289.051	50.8689	3068.81	3097.88	3172.48	2931.17	85.3986	8167.96	8276.16	8815.85	8246.45	122.507	8576.89	8626.29	17503.8	17127.2	156.037	37124.3	23238.8
12.2006	33352.4	17674.4	88229.4	31.6192	49363	31087	151731	2.79749	4350.26	3122.12	11967.1	1.01397	21.6708	20.3582	21.2596	21.069	9.80656	268.131	255.122	272.751	275.996	12.9959	185.841	176.164	191.003	188.114	20.6338	280.708	287.186	295.146	273.381	53.6654	3312.99	3223.79	3303.69	3274.27	94.7372	9564.56	9314.01	9520.64	9543.13	145.21	10430.7	10052.3	21376.9	20259.4	176.079	45617.1	26909.7
6.27694	16998.9	9629.14	46153.7	12.6828	20090.3	12266.5	61719	2.52869	3917.23	2858.48	10447	4.20994	87.3155	90.2194	90.0012	90.1143	6.19385	169.083	158.789	162.817	169.251	17.3479	241.334	241.106	234.498	242.407	27.2573	364.202	386.138	372.801	360.838	42.2447	2460.38	2635.34	2551.03	2450.5	65.9762	6418.15	6435.29	6822.84	6216.69	145.93	11089.9	10097.9	20603.7	20953.4	193.579	49432.2	28689
17.4071	50224.3	26315.5	125379	22.1314	34426.6	20132.3	110359	2.02737	3070.12	2369.77	8519.06	2.11122	42.5108	45.3017	44.6387	41.442	5.97061	168.37	157.345	156.274	165.209	19.5557	286.68	288.493	283.865	282.755	20.8975	296.717	289.869	302.137	300.799	30.0777	1878.58	1886.34	1811.26	1735.17	62.751	5947.83	6352.97	6158.99	6253.15	142.144	10230.5	10068.3	21327.6	21591.9	185.852	46097.8	27293.9
8.6434	24882.2	12868.2	67097.3	28.4234	45644.6	26048.9	140114	2.30648	3677.75	2703.69	9798.53	1.74101	35.926	37.3365	37.3425	37.1297	6.47738	171.452	179.016	168.101	180.125	11.079	154.778	159.38	152.605	152.847	29.6357	409.301	408.638	413.708	422.185	56.4071	3516.57	3362.99	3327.37	3352.81	77.8094	7346.3	7758.22	7551.44	7567.49	139.105	9711.74	10185.3	19802.8	21030.9	186.601	44267.2	27140.6
15.2469	41589.5	23486	120409	38.3463	63693.2	34362.1	196431	2.79853	4223.27	3377.39	11724.4	3.81666	79.3755	78.9296	81.0159	79.2183	6.15964	161.831	171.584	163.606	171.033	10.2238	140.277	151.064	145.754	148.2	21.0865	281.089	295.846	301.087	304.654	38.6353	2385.59	2334.88	2227.38	2415.03	72.0461	7216.58	7014.97	6792.77	7344.97	107.688	7493.49	7597.91	16094.7	15644.1	166.417	40630.3	24255.8
8.26863	23244.1	12474.7	62664.9	37.0701	59136.4	36054.4	183517	2.20789	3546.55	2680.98	9282.4	4.60945	92.6689	98.7728	94.7343	91.9041	7.10819	185.071	200.179	191.396	184.943	17.9282	257.147	259.813	262.162	254.789	22.7047	307.111	304.716	300.426	316.162	33.7403	1987.82	2024.02	2006.2	2052.18	83.2848	8316.88	8455.42	8436.63	8174.59	138.876	10059	9991.72	20634.3	19647.6	159.798	39716.4	24117.5
19.4557	54114	29875.8	145949	13.3125	21870.4	12770.3	64067.2	2.47147	3727	2764.25	10631.1	1.23243	24.8633	25.8763	25.7434	25.0749	6.43859	181.66	166.827	176.94	181.596	10.2165	140.342	140.795	140.395	143.205	20.5864	291.465	287.69	273.131	275.02	54.9142	3311.08	3350.02	3295.3	3176.03	88.2019	9002.43	8479.19	8885.17	8882.94	133.551	9673.92	9366.46	18848.2	19651.5	172.043	41621	24935.5
6.2146	16684.2	9279.54	46187.9	24.2468	39334.4	23447.7	115264	2.0292	3347.16	2410.76	8929.8	3.2745	63.8516	68.5296	64.0764	64.8678	6.5647	180.672	175.885	185.376	181.501	17.3346	233.505	236.899	241.637	246.64	28.4572	374.534	400.19	409.231	376.313	41.0265	2431.19	2507.53	2441.5	2388.05	71.5391	6848.07	7211.52	7212.48	7221.83	143.514	10112	10512	20322.9	20951.9	178.045	44669.1	26307.8
14.0591	41018.6	21649.6	108651	23.1475	35251	20777.2	112667	2.93134	4549.99	3290.22	12503	1.21857	25.6254	25.4732	24.7445	25.4093	9.54093	250.408	258.219	254.708	265.913	15.4954	211.731	216.88	224.444	218.886	26.4392	368.853	370.968	360.623	380.935	58.7504	3489.02	3636.43	3534.94	3351.65	82.2469	8377.02	8440.23	8189.65	8105.6	149.014	10912.4	10719.7	22524.2	22627.6	155.061	40388	21600.3
5.6472	15155.6	7887.36	43035.5	35.7766	57553.5	32744.1	169349	2.97667	4602.64	3429.48	12870.1	3.91386	79.1335	76.7081	80.5313	78.6221	9.88638	270.41	276.867	265.645	273.737	15.2112	207.204	206.924	205.819	211.04	25.6215	342.672	344.48	344.125	348.689	38.0577	2278.51	2265.53	2377.85	2286.11	91.8131	8982.81	9404.39	8983.97	8626.6	114.37	8468.73	7713.53	16488.9	16930	188.178	45954.1	27749.6
11.1028	32517.3	16274.8	86858.2	33.6141	51186.1	33197.6	160047	2.35785	3762.05	2724.74	10227.2	1.69099	33.8015	33.658	34.8209	35.2755	6.07009	166.954	169.564	166.549	164.774	19.2371	272.586	272.79	282.08	282.524	28.7908	389.7	378.745	412.647	378.187	56.9736	3395.98	3355.26	3565.87	3483.1	93.9882	9719.05	9077.61	9519.09	9440.76	145.458	10795.2	10293	20893.7	22133.4	198.815	51270.6	27643.9
7.44648	20250.8	11407.4	56943.4	19.7178	30692.5	17891.1	98782.7	2.04849	3144.36	2361.76	8597.91	2.27067	46.3675	46.6707	47.3457	46.6768	7.05091	186.397	189.628	191.286	180.494	14.6051	202.346	201.661	204.374	203.486	28.9113	384.63	417.802	386.567	403.063	57.1408	3343.03	3508.13	3492.59	3546.18	86.5629	8671.75	8268.64	8184.69	8709.37	102.422	7562.09	6889.65	14814.8	14966.5	194.606	49216.1	27617
15.5548	43955.8	22506.3	112754	37.9246	60047.6	34814.4	194830	2.89836	4480.22	3389.97	11973.4	3.8661	75.6666	78.6695	82.9565	79.6563	9.93324	273.19	270.918	280.642	258.587	15.7398	224.481	229.132	218.986	218.49	22.1989	315.492	298.033	291.533	313.567	30.6806	1763.79	1889.25	1842.53	1898.26	84.6285	8466.65	8779.03	8099.94	8113.47	122.338	9003.26	8984.51	18465.4	17484.8	164.906	40920.2	24576.8
15.7235	44910.7	23852.6	119955	38.6094	61121.3	37725.5	185737	2.38503	3912.54	2888.86	10197.2	3.91604	77.3994	83.0985	81.3661	79.3949	9.54888	256.692	255.074	262.744	258.091	15.666	224.235	212.938	215.166	221.334	27.7115	387.884	397.576	395.176	391.914	39.6384	2437.17	2263.34	2400.52	2314.47	87.8256	8750.57	8320.21	8649.81	9071.67	112.195	8316.14	7720.35	15737.5	16508.2	184.177	46478.1	27317.4
19.5643	53309.5	28553.5	147069	14.2326	22526.4	13620.8	67495.1	2.01961	3251.13	2460.08	8948.82	2.50689	52.2019	53.3435	52.9944	49.2021	8.97302	244.094	233.27	247.084	238.304	12.5465	175.055	170.597	168.702	174.424	29.8017	412.68	405.763	409.252	429.312	58.5484	3553.3	3345.32	3561.29	3521.7	74.0782	7443.5	7586.55	7635.59	7387.6	148.32	10484.5	10244.3	21226.2	22023.2	183.933	46237.3	28231.2
13.1615	35668.1	19884.5	100487	30.3836	47305.7	27413.6	154154	2.29039	3483.11	2782.54	9320.78	4.19849	85.129	85.2215	87.5271	86.9848	7.29253	193.533	191.639	202.155	195.264	16.4713	227.784	223.594	228.706	230.958	21.4175	290.892	302.89	286.411	291.789	51.0484	2989.89	2980.88	3012.24	2996.25	82.6324	8522.65	8534.44	8319.58	8544.82	112.973	7826.57	7828.72	16805.6	16888.7	190.378	47941.6	28617.3
10.0589	28427.8	14237.6	77873.2	12.8343	21267.6	11901	65233.7	2.31318	3663.19	2718.54	9717.64	4.8917	97.8618	100.934	100.627	95.6507	8.96825	235.789	245.996	235.648	250.954	18.05	260.679	246.711	255.914	250.985	23.0956	333.04	331.795	325.722	308.084	49.4462	3014.75	3065.61	2896.33	3078.48	64.1594	6165.35	6628.52	6260.52	6164.3	115.115	8091.57	8376.26	16460.4	17634.8	198.27	50312	29729.1
19.0928	55717.5	27548.8	139975	18.1523	28341.8	17925.4	89862.7	2.16696	3453.8	2507.72	9544.21	1.81305	37.1476	38.8583	36.6963	37.4088	7.7311	215.741	209.273	215.592	214.005	10.9265	154.276	152.41	160.059	147.89	23.201	330.711	305.186	310.876	313.433	53.0629	3289.65	3244.97	3241.73	3038.12	80.6168	7644.15	7681.06	7917.02	7572.83	123.665	9373.5	8484.03	17270.5	18928.2	184.069	47252.7	27160.8
19.3871	51966.9	28867.2	142993	22.9942	35035.7	21342.1	107901	2.52239	4023.46	3070	10535	2.00106	39.1016	41.4374	42.7515	39.6727	7.50902	193.007	210.01	196.861	196.861	12.5811	183.467	177.176	173.675	182.425	22.1086	299.14	294.785	303.8	301.893	37.3958	2142.4	2192.69	2245.21	2233.95	82.2887	7897.35	8068.89	8044.58	8041.4	142.648	10048.1	10075.9	21839.1	20408.2	166.547	40103.4	24286.1
18.2899	49893.5	26058.2	140777	20.7333	34456.4	20182.9	105018	2.55577	3900.92	3147.99	10519.6	2.83798	59.4472	59.0472	59.5461	55.5064	6.74585	183.181	174.153	182.114	183.611	12.9399	184.927	173.951	189.806	180.086	24.947	358.127	339.012	352.381	353.605	54.2101	3356.67	3153.2	3163.59	3096.02	92.9762	9056.33	9315.4	9316.23	9557.4	108.968	7981.99	7707.5	16614.2	15639.6	174.085	42107.2	24642.6
19.868	54315.1	28755.4	151649	13.0253	21642.1	12233.3	66622.4	2.69008	4394.14	3234.82	11589.3	1.3872	27.0614	27.4845	29.3646	28.2865	6.67742	185.558	178.614	172.488	183.997	15.5114	210.129	225	211.166	216.75	26.7382	381.432	370.629	359.096	383.123	44.1722	2672.11	2585.03	2671.34	2508.7	84.1053	8598.13	8137.89	8671.81	8325.53	121.069	8980.12	8441.88	17852.4	18058.1	172.564	42761.9	25623.2
14.0968	40700	21246.3	104222	33.5556	55060.6	31534.7	162158	2.31962	3823.16	2688.21	9883.15	3.45251	73.5244	69.6961	73.05	72.792	9.52695	258.395	263.76	266.919	255.795	11.3481	155.113	160.214	153.967	156.79	25.3718	347.676	359.183	354.871	335.693	53.5514	3309.06	3055.05	3136.27	3083.21	96.8269	9555.46	9788.98	9208.25	9886.36	113.719	8015.07	7908.54	17126.4	16090.6	151.732	35912.5	21456.8
17.8521	50074.5	24924.7	140860	33.7458	53788.5	31266	172878	2.73079	4324.08	3133.39	11030.7	4.74206	94.6737	93.0054	96.3409	95.9033	9.35142	243.34	251.438	255.723	255.594	11.9724	173.594	165.218	169.942	166.518	26.109	361.799	368.014	351.613	362.902	59.8052	3473.62	3398.2	3452.92	3573.2	99.2972	9556.78	10010.4	10261	9818.85	125.965	9279.64	9228.38	19264.3	18680.9	184.293	45452.9	26102.4
16.8561	45769.7	25863.8	123319	18.2747	30230.8	17739.8	93088.5	2.74388	4231.86	3206.63	11616.1	3.80847	78.8402	76.9258	77.8438	79.9841	7.51318	192.822	206.287	211.592	199.75	10.7311	157.624	144.433	151.322	158.776	24.3107	331.802	327.315	328.126	341.107	44.6223	2555.56	2714.43	2660.26	2641.52	67.4523	6788.02	6615.29	6391.95	6855.66	148.799	11017.7	10577.1	22117.1	22759.8	194.612	49848.4	29800.7
18.0583	52524	25485.2	136097	38.92	61939.9	35677.6	181659	2.01275	3229.57	2390.59	8763.42	3.06697	63.0035	63.9833	65.2744	64.4668	6.15847	159.471	166.801	163.863	163.228	17.0499	245.385	230.781	239.634	231.429	21.0821	299.416	276.471	289.4	299.88	42.4101	2431.94	2481.95	2419.06	2614.83	84.1937	8172.44	8373.89	8335.36	8197.56	135.537	9389.69	9337.4	19703.7	19770.8	174.183	44057.7	24543.8
11.1126	30510.5	17115.8	82927.3	14.241	21895.8	14010.9	66656.9	2.40676	3988.07	2708.69	9945.27	1.53857	31.1193	30.4637	33.0862	33.0754	8.62864	231.374	243.298	242.985	231.367	12.4896	182.949	183.635	172.82	185.354	20.8672	280.285	274.716	278.076	274.907	58.0493	3339.34	3576.18	3486.91	3534.1	61.1661	6233.7	5958.56	5965.47	6206.08	124.656	8989.13	8689.66	18977.7	18268.7	193.361	46389.7	29086.2
18.0772	52965.7	25264.1	135541	28.8966	47331.3	27368.2	137864	2.728	4388.53	3240.3	11848.8	4.37932	85.2904	92.8265	86.0993	93.2217	7.15849	196.676	194.804	198.104	184.434	10.9865	152.855	151.005	150.753	151.334	28.02	395.784	378.046	391.205	391.56	45.8401	2868.56	2642.82	2615.5	2809.89	94.6121	9415.79	9120.51	9150.96	9128.09	121.589	9147.1	8368.18	17625.4	18214.4	166.015	39181.9	24629.7
5.52721	15577.4	7846.17	42201.5	35.3814	56188.9	33773.4	173618	2.03928	3171.76	2309.64	8728.58	3.71619	79.0456	72.7784	74.1352	76.4403	7.84916	204.779	216.52	204.274	203.776	14.9184	214.591	216.805	217.327	213.759	20.0587	272.867	263.7	270.138	265.106	46.3662	2894.23	2898.47	2864.89	2743.2	64.3074	6562.46	6311.88	6285.61	6062.52	147.14	11024.4	10199.1	21660.5	21912.5	185.9	47621.4	26536.3
8.12735	22266.2	11484.9	62114.9	21.3808	35379.8	19334.1	103985	2.03651	3282.84	2314.88	8296.12	3.60567	74.4764	71.9815	75.4388	76.0074	5.16461	143.028	143.188	135.645	135.297	13.9025	190.845	187.294	195.262	202.899	20.7515	272.371	289.501	279.643	299.398	57.6274	3440.38	3394.2	3536.72	3527.12	76.7776	7316.96	7706.14	7763.01	7426.76	140.888	10568.8	9981.71	21279.7	19818.1	156.938	39705.9	23680.4
18.105	49307.4	26237.5	130330	12.2535	20172	11770.9	58333.1	2.29327	3582.92	2639.78	9802.67	3.72779	73.4271	76.7841	74.9191	73.6403	8.65866	236.242	231.713	228.769	223.635	13.4806	188.281	184.551	184.695	190.231	29.8699	428.355	400.398	394.732	410.414	41.541	2571.11	2584.4	2468.03	2533.97	74.7333	7433.4	7429.26	7690.16	7677.42	140.716	9928.74	9704.15	20518.9	21225.8	179.228	43932.8	27052.6
18.5072	51441	27485.8	138294	31.5936	51019	30933.7	160035	2.08515	3449.34	2330.83	8717.38	3.7525	76.2726	79.9051	78.215	74.7396	8.16242	224.653	222.362	217.148	215.638	13.8828	189.634	199.884	188.493	189.66	26.0876	345.375	354.498	352.196	372.668	52.0072	3249.62	3042.42	2955.39	3077.79	79.9089	8063.32	7843.05	8239.73	8109.01	118.052	8333.27	8455.25	17713.7	18098.9	158.497	40217.2	23752.8
16.5752	45080.3	24169.6	122628	23.2229	36331.9	22614.3	110195	2.73947	4556.4	3340.68	12053.3	2.1899	44.7262	44.9827	46.5007	45.9748	8.48488	222.406	223.242	218.33	236.09	16.2091	219.827	221.044	222.222	225.385	27.9462	394.66	375.206	377.832	379.175	56.1199	3311.11	3323.22	3315.54	3471.24	69.6332	6825.36	6720.89	6766.98	6957.51	107.869	7679.22	7772.86	15257.3	16339.3	168.204	41084.5	24925.8
12.1829	34206.1	18109.1	94286.9	10.66	16286.8	10296.5	51595.5	2.89999	4399.04	3547.26	11651.1	3.08611	61.9508	66.1097	63.2041	61.184	8.4582	237.274	226.038	227.972	228.869	12.3732	175.224	179.926	172.635	172.52	24.8167	358.894	355.505	346.788	356.296	34.7467	2072.52	2091.22	2077.51	2018.52	74.3168	7491.81	7013.12	7116.06	7272.85	131.317	9772.95	9114.35	20160.6	19876.2	165.205	41733.5	24707.9
18.6732	52862.5	28015	146228	15.9992	26115.6	15356.6	81122	2.10295	3214.27	2536.43	8794.1	1.84662	37.4122	39.6446	39.563	37.1872	6.63138	176.413	186.134	176.974	180.336	18.523	251.947	265.566	272.471	254.738	25.7672	352.022	359.558	346.572	342.15	56.5316	3496.02	3274.36	3274.21	3490.81	75.2526	7272.69	7305.87	7267.77	7221.18	135.365	10241.6	9832	19872.3	20115.5	160.972	39105.3	23451.2
16.1666	44616.1	22974.9	117172	31.395	50953.8	30179.3	148263	2.2538	3556.01	2636.36	9352.05	1.08178	22.3672	21.3364	22.408	22.6924	8.58488	228.656	230.17	230.344	239.291	18.5891	258.211	257.203	274.63	253.929	24.7762	351.282	328.231	331.885	329.501	35.0405	2072.53	2161.06	2102.98	1992.5	71.2058	7331.01	7273.09	7019.97	6780.85	114.465	8238.46	8324.72	16274.5	16020.5	185.479	45490.6	26661
9.56108	26816	14652.1	74616.6	36.7826	60056.9	34255.8	177228	2.71091	4204.74	3155.26	11500.3	3.68746	72.2823	76.7608	74.4175	79.2323	5.00198	139.725	132.757	137.909	138.52	10.4823	146.999	148.906	147.295	141.24	26.965	365.372	381.18	387.375	356.73	35.8089	2061.91	2124.01	2068.3	2246.64	73.3158	7171.79	6949.16	6961.37	7490.08	120.686	8565.37	8168.45	17461.3	17034.9	170.467	44168.1	23993.8
19.5616	57017.5	28989.4	149723	30.9906	49001.6	30450.4	150763	2.38285	3599.74	2720.05	10213.3	2.97854	58.8818	62.9878	59.3436	58.2445	6.74344	175.269	188.334	185.7	185.963	11.9526	168.359	164.47	163.849	165.004	23.2256	320.879	312.167	327.403	307.241	38.9577	2423.94	2421.25	2277.88	2376.27	78.5192	7400.67	7421.67	7594.91	7881.61	128.952	9473.33	9452.65	18851.4	19690.8	191.652	49389.5	26766.1
7.18825	21070.8	11057.6	52700.6	24.43	38974.2	24145.9	119620	2.58065	4037.03	2977.11	10844.3	3.37949	67.5801	72.4302	71.3305	67.9214	5.37939	145.029	139.51	140.07	147.697	10.2172	141.352	140.351	145.271	141.358	23.1731	314.149	325.02	314.453	317.226	49.9133	2837.88	2989.65	2915.7	3060.16	98.2609	9982.36	9568.01	9272.83	9768.57	144.216	10382.2	10415.7	21916	20482.5	171.584	42384.7	25177.1
14.2713	38984.9	20737.5	110362	9.24963	15133.2	9138.18	45778.1	2.3978	3711.91	2851.47	9946.41	4.34503	92.3646	88.445	89.3373	86.5315	9.58946	263.947	256.638	260.174	260.698	13.9829	200.024	202.02	196.468	200.042	23.9076	331.292	318.1	322.988	337.449	52.5901	3180.9	3264.76	3125.58	3048.99	60.6483	5918.04	6231.5	6280.35	5700.48	138.707	10560.8	9522.29	20362.8	21034	154.227	37864.6	23461
6.35276	18616.8	9550.86	49486.6	24.4173	38782.5	24011.4	114433	2.86619	4570.21	3444.79	12117	1.68772	34.6646	34.86	33.8244	33.6371	7.54427	211.762	201.356	202.208	195.835	14.135	204.338	209.067	192.027	199.347	20.5886	274.816	286.292	272.784	294.48	36.4999	2265.86	2169.64	2102.74	2157.38	74.641	7088.51	7300.89	7432.21	7730.01	107.632	8037.89	7215.21	15592.5	15152.6	155.03	37746.2	21710.5
11.5874	31915.5	16844.6	88651.5	18.0149	30040.2	17088.3	87358.4	2.01018	3328.8	2243.99	8667.94	3.81107	79.3291	74.406	77.6921	81.6504	9.71428	262.671	250.944	259.316	249.082	17.3848	257.997	251.544	241.062	246.889	28.2595	392.201	386.947	385.614	401.825	56.7394	3344.18	3322.36	3382.03	3282.44	83.8312	8113.62	8123.89	8383.7	8453.13	114.007	8539.61	7783.06	15891.6	16005.1	186.765	47481.9	28215.7
16.9776	47106.3	23775.8	128170	18.1853	29295.1	16562.9	85087.9	2.34534	3630.83	2828.53	10209.1	2.06786	41.3369	41.2876	40.5935	42.1167	8.15169	220.694	208.413	229.72	220.593	18.3201	246.154	256.895	259.759	267.786	29.8678	431.921	410.867	420.743	391.788	54.9459	3212.92	3136.66	3196.72	3203.34	96.3286	9944.97	9399.48	9600.3	9918.57	110.325	7700.27	8072.74	16155.1	16744.9	162.239	38454	22605.7
14.7097	41621	21238.3	115377	34.3552	54263.5	33287.2	162631	2.91652	4762.77	3343.19	12125.8	4.07147	79.819	86.2877	87.2668	80.6432	8.84852	248.856	243.042	249.915	249.226	11.8644	169.279	164.625	160.25	165.686	24.9007	330.991	341.462	337.096	348.081	38.6083	2366.93	2237.87	2404.42	2343.02	99.7175	9408.45	9570.64	10270.8	10036.8	135.964	9499.31	9783.33	20042.5	18982.6	177.799	46142.3	25903
17.5191	48470.7	25064.5	132700	32.5253	52043.2	31092.1	158708	2.49906	3998.24	2849.64	10450	4.14239	84.6269	83.6408	83.3137	85.5673	7.2267	194.923	197.537	194.513	196.988	12.6017	181.012	171.379	171.817	183.501	27.4691	375.804	385.564	393.748	386.88	43.5713	2505.11	2540.37	2562.93	2691.37	69.0581	6983.36	6713.58	7090.56	7160.13	112.712	8550.72	7735.98	17167.9	16935.2	159.639	38068.9	22746.8
11.8749	32080.8	18086.7	87921.7	9.03344	13806.2	8501.01	45290.7	2.01674	3115.18	2303.6	8442.77	4.32442	90.1217	91.4947	91.7701	90.8526	8.05519	221.89	212.885	218.451	205.981	15.5464	223.998	225.262	208.923	225.692	21.4937	292.594	298.385	289.903	285.145	50.0617	3000.21	2873.19	3041.57	2908.85	91.629	9434.36	9410.61	8926.11	9266.69	114.994	8163.73	7694.52	16459.5	16970.9	161.107	41795.6	22912
12.32	34257.4	18790.8	90561	12.5042	20700.4	11214.6	58821.3	2.79257	4575.2	3249.64	11417	1.7161	36.2537	35.9355	35.2305	34.8499	7.65283	214.195	210.378	197.709	214.941	12.141	163.11	169.474	174.815	180.034	21.6203	306.839	306.215	298.095	295.816	31.3743	1855.15	1958.91	1893.08	1916.84	60.8677	6249.85	5753.62	5947.13	5886.4	142.294	10840.5	10391.5	20147.8	20991.4	175.772	45720.3	25830.7
7.0248	18786.9	10213.6	50832.6	27.2222	42990.4	25762.6	129434	2.45288	3712.42	2999.68	9876.5	1.26371	26.2184	27.0226	24.8225	26.4937	8.23312	213.627	230.505	214.451	212.512	14.1971	204.486	192.757	206.75	200.731	21.1356	284.928	288.288	297.063	276.986	54.9298	3159.86	3128.97	3350.75	3279.1	72.6275	7473.66	7139.73	7485.5	7164.54	112.353	8084.35	7846	16344.7	16884.5	198.893	49095.7	27659.1
15.9616	42489.7	22413.5	114440	14.4901	22468.3	13669.9	74294.2	2.57429	4144.66	3029.44	11394.7	2.97593	59.4556	63.2038	60.8451	59.8289	7.38834	198.84	198.807	194.54	200.509	14.1136	192.516	200.913	196.854	203.69	28.522	409.245	382.204	395.303	401.575	59.0136	3537.5	3538.34	3545.85	3597.12	92.1469	9330.77	8975.85	9502.62	9557.43	136.962	9666.31	9316.63	20040.6	19812.9	167.614	42306.6	25101.7
12.3773	34786.5	19042.7	96530.5	20.9681	33622	20473.9	107748	2.9693	4750.07	3365.84	12617.5	4.19275	85.4395	87.5519	89.0359	90.0158	8.49336	239.65	225.58	229.842	222.777	17.8135	240.757	260.027	241.056	252.543	20.5247	289.371	286.127	294.903	294.05	44.7154	2713.76	2600.5	2554.95	2579.76	61.8891	5876.95	6382.22	6009.16	6375.61	123.209	9031.16	9012.57	17559.2	18357.5	167.729	40494.8	24320.1
15.2946	43768.9	22031.2	119270	16.1578	26316.6	14694.4	75969.6	2.87347	4650.14	3506.38	11595.8	4.40321	90.497	91.5014	88.6936	91.2383	7.09769	197.78	196.194	185.285	183.82	10.705	151.94	144.525	157.602	146.685	27.7768	390.878	383.826	398.105	388.995	30.7481	1912.49	1914.23	1778.35	1747.27	78.4412	7557.61	7884.9	7964.52	7828.16	138.726	10366.8	9416.62	19797.4	20076	199.314	51611.7	30474.2
11.0211	31177.3	16648.8	83431.1	38.7103	60044.9	35208.5	197250	2.61539	4079.08	2983.76	10946	3.74148	78.7788	76.5532	78.7294	77.1549	5.56704	155.859	147.906	148.41	151.521	10.3262	152.559	147.307	143.785	147.267	25.6694	342.794	350.201	357.313	337.325	35.4006	2209.48	2057.71	2215.42	2059.98	84.0159	8510.7	8159.04	8392.21	7971.02	131.508	10033.3	9086.91	19879.6	18480.2	188.8	47156.5	28173.4
15.9871	42753	22966.5	124972	33.6459	53901	31069.8	169316	2.50751	3981.95	3080.87	10426.8	3.55337	73.6999	70.8775	73.0841	69.2113	9.50379	246.947	266.648	264.922	247.6	11.4706	166.467	156.264	163.184	166.572	20.6638	283.989	276.662	273.675	283.349	44.6565	2614.14	2705.26	2577.96	2768.29	65.1266	6411.24	6687.88	6585.57	6251.04	123.555	9069.28	8440.86	17411.3	18903.4	181.109	46520.5	25320
17.7122	47921.2	24708.7	128018	11.52	18653.7	11225.6	53891.4	2.06497	3128.47	2476.83	8461.05	3.26032	68.3036	67.5171	64.66	67.5089	5.53388	153.528	146.015	145.155	154.58	15.4673	208.07	207.811	224.447	223.397	21.6718	310.148	298.257	299.976	309.621	36.4995	2199.68	2086.97	2278.87	2099.64	75.622	7447.86	7746.26	7563.83	7484.63	148.481	11016.4	10627.5	20660.7	20902.5	170.815	40377	25322.5
12.0319	34364.6	18317.5	89079.9	19.5902	31038.8	18900.9	98274.9	2.56761	4037.73	3066.19	10451.6	2.9838	61.4788	58.7775	61.6191	63.3246	6.5661	179.646	175.707	176.579	170.808	10.6635	144.377	153.846	156.862	153.37	20.6259	287.124	290.259	284.547	298.141	44.8729	2707.58	2569.24	2641.51	2558.11	72.239	7431.11	7324.03	7367.17	6876.08	127.5	9279.64	9121.06	18610	18042.1	150.338	36730.9	22111.1
17.6736	48570.2	25289.2	126619	10.6349	16371.5	10479	53534.1	2.18421	3560.32	2491.95	9196.63	1.59072	33.9142	32.7838	31.2118	32.7087	7.77983	212.815	208.176	205.508	212.745	13.9212	206.469	195.795	193.814	192.395	21.2538	305.825	290.795	303.625	306.08	36.5198	2278.87	2283.9	2230.53	2078.22	62.4943	6403.58	6113.81	5998.43	6401.44	123.022	8918.32	8960.97	17752.1	17717.3	188.558	45852.5	27376.9
13.6511	37777.2	20246.6	101631	30.865	50406.7	28694.8	152576	2.72599	4287.42	3122.26	11422.1	1.07445	21.3393	23.0799	21.7209	21.5615	7.09262	183.805	181.33	185.827	190.438	12.0835	165.674	166.068	163.136	166.058	21.8653	302.426	308.229	294.198	302.012	47.7837	2772.26	2960.52	2956.92	2717.43	72.2395	6892	7491.09	7177.99	6871.55	103.951	7813.56	7540.73	15629.9	14966.3	182.491	47487.5	27152.4
17.1186	46374.7	25255.6	127572	27.7198	42654.4	26940	129327	2.33161	3702.26	2797.48	9826.98	4.94188	98.521	102.442	105.512	97.2769	5.30854	139.692	137.346	135.948	149.288	15.0485	205.741	214.832	207.101	206.032	20.5825	297.374	277.099	276.35	278.881	45.3961	2624.52	2622.43	2619.75	2843.84	86.7119	8343.48	8624.2	8219.66	8329.32	113.833	7926.66	7723.34	16373.2	16322.9	153.875	38699.7	22579.2
18.6653	52808.6	26666	137254	9.2058	15324.3	8843.25	44063.4	2.03623	3390.18	2476.74	8721.68	2.28285	46.2736	44.5835	47.4766	45.9472	6.38565	170.779	175.428	179.447	173.808	10.6597	151.908	152.398	149.907	144.769	28.8025	383.376	412.909	386.766	409.699	43.6325	2482.7	2675.05	2509.96	2673.32	79.6691	7881.21	7493.52	7493.75	8173.83	138.468	9733.87	9854.54	20629.1	20632.1	195.003	48276.2	29627.4
8.77362	25515.3	13105.5	64756.7	18.4634	29033.9	16683	94942.2	2.92219	4851.65	3509.31	12585.3	3.67738	77.9674	78.5475	78.5383	72.9307	6.42446	177.193	178.513	172.88	165.881	18.4322	258.701	256.846	257.561	261.841	26.2539	344.262	377.229	345.35	373.984	58.8084	3444.71	3583.17	3684.85	3631.07	69.8907	7104.79	7155.77	6866.77	6732.62	127.865	9464.18	9310.6	19257.4	18238.3	188.418	48776.9	28449
8.32184	24420.2	12187.1	60128.2	24.6027	39159.7	22941.7	118629	2.77908	4426.44	3177.33	11288.8	3.31722	68.4387	67.7932	68.6036	70.2887	5.62848	150.321	158.636	146.389	148.182	14.8715	214.826	216.132	206.227	215.808	26.8662	385.178	357.635	359.184	384.915	31.4905	1842.64	1938.33	1943.04	1916.72	84.0635	8471.54	8573.09	8053	8424.78	141.92	10130.2	10257.7	21017.5	21408.2	181.737	46907.2	27683
6.38243	17923.5	9069.12	48402.9	30.1019	46984.4	29333.4	145635	2.45552	4090.19	2794.33	10458.7	1.94817	38.3538	38.7488	39.1482	40.5978	7.66279	196.912	199.945	201.962	198.04	11.9567	176.51	161.177	167.589	177.063	23.0126	318.013	315.554	326.76	319.912	46.6729	2888.4	2893.69	2763.28	2762.36	64.322	6200.96	6221.59	6319.91	6583.79	107.736	7666.3	7376.53	16122.1	16544	168.912	43958.5	25644
18.5044	49723.6	26881.7	137255	11.5396	17745.1	11176.3	56411.4	2.99326	4832.65	3650.29	12230.8	3.2712	67.6959	64.3791	67.9165	67.0323	8.53848	219.526	237.219	221.578	238.578	14.5893	204.274	209.78	197.259	197.363	28.1321	369.553	391.452	376.108	396.264	34.2481	2110.74	1989.83	2005.61	1990.47	93.4045	8982.6	9184.87	8792.4	9491.84	128.112	8876.43	8842.77	19526.8	17881.9	189.599	49069.3	27622.2
11.8663	33266	17176.1	85729	14.3216	22334.1	13329.4	71373.5	2.18305	3352.17	2624.35	9256.97	1.38062	29.6773	27.2525	29.1236	29.6343	6.48494	166.898	180.601	165.991	176.595	11.4735	162.857	158.039	160.006	169.521	26.6061	355.899	360.211	360.521	351.109	53.3369	3082.55	3292.82	3306.98	3325.78	65.5983	6413.75	6469.69	6237.3	6278.74	105.122	7564.11	7648.61	15772.5	15585.8	150.98	37735.3	22097
17.2786	47728.2	26605.8	136474	38.3183	59207.5	36860.4	179119	2.91334	4849.66	3479.57	12224	1.29677	25.5734	27.2592	27.5635	26.5526	5.48871	151.595	155.029	153.657	143.004	13.4596	181.827	196.849	191.212	196.084	22.8357	329.973	326.178	306.68	300.41	42.9774	2675.59	2647.05	2668.71	2665.87	72.6522	7085.66	6864.18	7305.32	7027.13	104.446	7863.98	7318	14871.9	15042.3	162.185	40662.5	22864.9
17.9189	50400	25780.1	131497	34.617	57544.9	32135.7	170249	2.86602	4759.71	3467.18	12692.7	2.11194	42.299	42.604	42.8493	44.2461	9.1398	239.656	252.162	249.23	246.199	12.5372	179.024	176.543	170.482	169.753	23.9933	327.231	314.989	331.184	344.49	47.3253	2699.69	2770.65	2881.35	2849.56	91.8721	9120.71	8987.54	9005.52	8972.26	148.072	10929.2	10621.5	22733.8	20731.6	186.324	47409.8	26429.3
19.9039	57396.4	30635.8	148327	38.9751	62182	38381.8	183726	2.12882	3318.37	2607.72	9241.88	4.06125	80.3038	86.625	85.6994	80.2263	6.99942	192.159	189.445	184.78	193.399	16.4392	239.655	225.085	232.431	230.386	29.4396	401.71	385.816	419.799	406.735	55.9705	3256.08	3475.44	3409.37	3403.01	76.7609	7366.53	7371.73	7304.4	7570.57	138.929	10552.6	9996.56	20303.7	19370.9	151.105	36797.5	21477.9
9.84838	26458.6	15093.4	72748.7	35.6728	55986.2	33143.1	177760	2.61732	4052.77	3169.78	11563.3	2.11144	41.4153	41.0949	44.7405	44.2647	9.23887	238.166	240.334	247.478	256.901	14.8342	218.647	206.177	199.33	213.439	29.9952	414.284	410.909	398.177	401.974	33.8411	2039.07	2085.24	1938.86	2122.4	88.1587	8857.19	8838.91	8943.23	9101.58	133.842	9411.32	8921.68	20122	20201.3	150.709	36458	22440
16.4787	48319.9	23076.1	128775	39.961	64800.2	39334.7	199800	2.1989	3402.42	2470.8	9048.29	3.81221	81.4577	80.2235	81.8335	75.8562	8.09076	222.547	217.095	217.468	225.251	12.2591	166.424	177.545	179.383	176.641	30	406.081	417.917	397.245	395.26	49.6078	2892.22	3096	3016.13	3022.75	71.376	7303.84	7314.13	6972.03	6997.51	112.49	8440.75	8273.25	16262.3	15645	166.83	40234.8	24397.6
19.3622	52311.6	29363.2	151845	17.3011	26856.3	16212.6	86978.4	2.48936	3908.05	2827.19	10266.3	2.43555	51.7734	50.2577	48.3153	50.2684	7.44856	202.107	191.117	207.404	196.747	10.1046	141.633	146.018	141.931	138.734	23.1252	305.412	333.088	306.495	334.085	53.9534	3263.39	3258.7	3146.98	3162.78	81.8553	7831.81	8399.19	7930.38	8201.24	136.487	10089.6	9309.12	20570.2	20675.2	154.54	39535.9	22376.9
5.02207	13758.7	7481.44	38050.5	28.2964	43372.2	27737.1	133271	2.37571	3951.08	2816.75	9676.99	4.3092	85.7332	88.7191	89.6177	90.2795	5.74949	160.169	150.991	156.42	150.985	17.4468	254.289	257.705	245.499	251.854	25.4516	335.331	335.904	347.774	340.917	57.9837	3408.92	3433.59	3589.43	3630.47	66.0544	6666.56	6281.85	6716.57	6512.48	117.827	8508	8200.66	17077.4	16699.3	152.206	37914.1	22711
11.0364	31870.2	15640.7	81996	20.9655	33269.5	18884.4	100286	2.64859	4241.66	3156.85	11564.7	4.16015	86.6441	88.082	87.2847	88.7889	8.52281	229.134	229.96	238.887	220.501	19.8837	280.976	292.051	268.015	281.57	21.5508	303.277	290.34	284.386	302.596	57.2395	3536.86	3414.66	3284.36	3289.18	92.8765	9107.99	9172.28	9331.59	8833.3	145.415	10863.1	10603.2	22320.9	20587.8	157.15	38210.2	23139.4
16.8759	45355.7	23936.2	129390	35.8829	59532.2	33442.3	173361	2.13456	3268.22	2593.98	8645.47	4.31393	85.3028	84.8566	92.5143	88.9648	6.70082	171.464	187.366	185.257	176.669	19.9154	292.028	286.687	272.308	268.925	27.2282	359.714	388.671	373.988	368.263	50.179	3085.76	3073.09	3121.53	3076.32	70.0911	7048.37	6654.75	6756.44	7163.66	123.935	8694.58	8459.7	18702.8	18199.6	153.821	39700.7	22029.1
18.1367	51647.3	27664.1	130678	35.2674	58762.8	34425.1	180079	2.7507	4368.09	3300.08	11226.6	4.3455	93.3155	86.7805	92.8441	89.0004	5.56677	151.616	148.47	149.222	150.764	11.1411	151.372	162.835	164.206	160.003	28.9076	412.727	386.212	406.745	387.006	30.2619	1802.23	1821.74	1786.55	1893.6	76.5678	7481.46	7749.59	7814.09	7309.8	107.705	7521.7	7849.27	16470.2	15528.7	198.494	48476.1	28172.1
15.8948	44563.5	24347.7	123586	22.2331	35027.1	21564	106093	2.81922	4612.7	3358.53	11401.7	4.07507	81.464	79.5904	80.4859	82.9201	7.49748	199.221	198.577	208.791	201.038	16.7985	234.469	242.826	242.835	232.224	23.2961	325.414	323.086	326.774	334.528	45.6335	2621.44	2747.44	2752.08	2726.57	70.5263	7276.55	7124.15	6784.11	7061.85	140.794	9784.13	10151.6	20045.1	20687.6	195.673	49530.4	28748.4
9.4958	27284.6	13460.7	74034.8	15.2848	25232.7	14634.7	71909	2.51121	3897.95	3012.22	10638.2	4.19767	85.7114	89.1682	85.5774	89.7623	7.69682	216.498	212.783	206.561	205.116	19.6994	280.846	275.292	289.722	276.689	20.065	269.288	288.457	284.051	285.388	49.5703	2961.29	3099.91	2913.8	2947	94.1584	9004.42	9267.04	9455.16	9016.69	140.315	9949.02	9769.81	20229.7	21027.4	196.106	49654.3	27897.6
6.85092	19446.8	10157.7	54151.9	39.1553	65540.3	38032.1	194710	2.31406	3592.78	2666.97	10101.8	4.12259	85.1902	83.065	81.7856	87.159	7.72861	213.441	215.109	207.032	215.475	11.4498	160.527	155.892	162.095	160.233	29.6065	403.503	403.771	424.136	409.643	39.3145	2422.35	2261.31	2379.06	2252.6	95.7603	9059.39	9508.83	9114	9867.81	123.522	8988.27	8722.79	18175.1	17696.9	190.329	44985.2	28638
8.73435	24783.2	12851.6	66224	39.0591	62626.4	35581.7	183158	2.22073	3664.05	2605.61	9009.02	1.8878	38.6878	39.312	36.7512	38.4551	8.12166	208.003	212.075	208.629	211.25	12.4534	168.074	181.085	179.352	179.994	24.167	323.695	346.918	324.759	322.828	55.6477	3360.44	3441.28	3339.81	3231.91	90.0927	8670.9	8623.88	8547.55	9305.1	100.03	7382.05	6769.37	14974.8	13961.4	173.29	41014.6	25529.4
16.5012	47143.3	24145.9	121802	26.4636	40942.4	25051	134901	2.27885	3647.85	2581.7	9595.5	3.90955	82.6503	79.2247	78.1128	82.755	9.45474	249.199	260.011	243.571	263.454	19.6837	264.483	273.014	282.267	280.29	23.4241	317.137	313.676	314.649	330.945	39.9348	2281.88	2378.7	2394.72	2364.6	97.8255	9947.78	9792.17	9958.52	9577.11	106.858	7561.34	7728.66	15588.5	16347.5	179.934	45730.8	27384.8
18.8464	53406.2	26643	138542	16.7857	27682	15838.6	83428.2	2.93671	4764.42	3442.9	12872.3	1.82033	35.7337	38.6903	37.1472	36.3691	8.31106	218.556	221.779	234.565	219.244	10.8816	156.392	160.27	157.75	150.803	28.4952	376.254	395.007	374.205	404.179	58.7068	3674.59	3381.1	3527.33	3404.27	89.2146	8626.13	8406.38	8809.77	8846.75	122.317	9001.09	8233.33	17202.3	17188.5	195.128	49459.2	28380.4
11.1806	30021.9	16931.7	88167.7	35.3966	57217	34856	166082	2.18507	3547.24	2528.64	9495.42	3.3919	68.9628	68.8611	69.0596	70.0857	5.09571	132.115	137.966	135.595	143.24	15.8864	233.883	217.616	216.988	221.263	28.5307	391.553	397.845	374.102	403.997	52.9723	3134.85	3041.55	3179.71	3068.23	60.0653	6177.64	6195.29	5958.92	5637.71	141.515	9808.94	10226.7	21284.2	20044.3	160.134	41121.5	24057.4
19.3405	54957.6	29493.4	144345	34.7844	55053.3	31912.7	174826	2.55909	4198.56	2866.43	10324.6	1.31869	25.6661	27.1771	27.1033	27.5121	5.66646	159.592	149.785	152.761	146.302	12.3273	168.771	168.572	172.246	174.738	23.7162	319.091	339.283	330.505	333.782	34.0855	2022.53	2005.29	2115.09	1940.88	83.259	8109.26	8130.42	8240.32	8339.74	131.823	9834.55	9220.75	20131.8	19320.1	188.701	48701.6	27394.8
18.8767	51353.3	27942.7	148116	16.7044	25500.9	16010.2	85128	2.91457	4562.44	3285.88	12023.3	1.19465	24.6722	24.0712	24.1862	24.4033	8.33747	223.241	224.539	216.474	230.41	12.6119	181.244	173.731	187.125	174.834	28.1105	371.171	371.414	389.828	376.493	32.5618	1951.06	1885.1	1931.67	1995.41	83.7139	8606.54	8262.58	7991.82	8345.78	116.703	8738.19	8564.59	17320	16356.3	158.311	39930.3	23441
6.63997	18820	9748.26	49593.9	9.4584	15428	9203.5	45507	2.79443	4341.71	3312.36	11617.5	4.86142	100.827	97.5172	98.9452	100.956	6.02937	168.427	170.123	157.775	158.476	17.213	232.602	241.744	241.313	239.407	23.5653	335.246	332.341	328.954	320.362	46.0121	2645.86	2861.18	2620.55	2846.72	67.7297	6615.61	6611.75	6527.69	6447.94	127.53	9182.31	8764.86	18336.2	18794.1	171.141	43043.2	24567.5
15.647	44383.1	23185.9	119824	23.1347	38158.2	22180.3	115190	2.8259	4474.7	3246.89	11598.1	4.02085	81.6473	85.6933	79.8754	78.2884	6.42544	165.177	170.297	172.346	177.613	16.4483	232.038	225.481	225.057	231.403	23.4418	338.53	314.25	335.747	324.222	49.2317	3007.58	2864.99	2918.07	3022.97	85.5612	8186.22	8095.01	8475.63	8335.32	148.578	10783.3	10009.3	21739.5	21383.4	196.367	46598.5	29816.3
11.1665	31536.8	16716.8	81412.7	26.2524	40273.3	25927.8	131359	2.83512	4481.29	3175.88	11686.7	4.05217	85.9087	86.1373	84.7998	84.9358	9.25919	243.787	252.821	258.314	257.155	11.0438	152.404	149.171	159.278	150.906	24.5119	344.507	338.482	334.819	330.53	31.9048	1813.03	1950.66	1853.23	1952.37	90.7441	8743.27	9072.95	8894.13	9112.69	142.493	10144.6	9640.78	19814.7	20706.2	154.269	37933	22049
11.0702	31573.5	16395.3	86542.6	33.3047	51601.6	30808.6	164348	2.60274	3998.97	3195.06	11257	4.66145	98.3386	93.5306	97.877	92.4509	7.78213	201.657	213.054	208.778	202.736	12.5548	171.917	176.655	177.296	184.469	25.1826	358.792	353.175	353.299	336.075	54.2264	3217.84	3097.57	3395.97	3248.21	81.5725	8342.7	8401.75	8351.42	8062.47	100.452	7509.56	7131.02	15054.6	15144.7	158.169	41159.2	24138.4
12.6249	35529.2	18581.4	96407.7	18.655	30935.8	17588	94503.2	2.96271	4697.91	3545.93	12525.3	4.50185	96.5834	87.7794	88.7983	91.4391	6.70833	181.031	175.8	178.643	179.574	12.8334	182.991	185.995	187.726	173.487	29.4048	386.076	411.72	401.395	412.432	52.9389	3317.99	3028.75	3025.96	3038.25	90.403	8903.82	8662.78	9072.95	8498.01	115.375	8248.76	8408.53	17538.5	16390.6	185.549	46615.1	26632.1
6.52397	17620.6	9137.13	46919.3	16.0724	26430.1	14452.6	80064.8	2.48608	3913.28	2883.3	10284.1	2.05177	43.3567	40.6072	40.039	42.4214	5.33862	139.991	137.959	140.067	144.842	17.8412	253.115	251.449	263.905	260.899	26.9166	357.191	369.175	378.53	387.924	39.5081	2263.15	2363.31	2260.57	2323.54	87.4588	8446.35	9040.73	8780.2	8434.42	117.263	8883.06	8024.9	16796	17673.9	187.331	44167.7	28576
14.7586	41101.4	21161.2	110733	37.8611	58333.9	36198.1	185509	2.52031	4131.51	2956.72	10134.8	3.41823	69.4572	71.8341	67.5343	72.7493	5.34553	147.941	144.074	147.573	144.398	16.1995	223.472	236.411	222.249	230.796	28.8754	387.488	395.972	414.723	416.542	31.4023	1919.88	1852.79	1910.62	1819.27	87.7458	9008.5	8663.1	8281.44	8452.42	121.313	8967.33	8338.11	17569.8	17744.8	184.999	43997	26183.4
10.0195	28460.9	14991.3	77972.4	27.7529	42764.3	25389.4	135846	2.77086	4583.46	3352.45	11679.1	4.12476	85.3414	82.6154	85.1713	86.5849	8.80299	230.69	248.367	239.044	234.482	16.7303	238.482	239.047	241.155	236.467	21.968	309.693	313.721	316.065	293.211	52.9915	3043.83	3093.32	3047.68	3105.07	88.4457	8435.69	8448.25	9142.76	8475.32	127.027	9298.75	8787.54	18400.8	19378.4	168.717	43496.5	25551.8
10.9602	29301.1	16533.5	79022	18.9656	29700.7	17911.7	96718.5	2.02294	3308.02	2399.33	8790.93	3.54976	74.5156	70.2295	69.7444	73.1505	5.0146	139.874	129.728	130.497	138.791	12.4645	171.698	183.645	181.78	182.074	22.0557	295.774	305.042	310.481	298.628	55.8082	3422.4	3271.78	3417.01	3458.95	73.8226	7375.32	7414.98	7099.97	7520.85	148.067	10890.6	10133	22290.8	21081.3	155.083	40018.5	22347.3
6.08506	17509.1	8691.2	44054.4	30.2413	48943.1	27255.1	142699	2.09177	3341.48	2350.12	8697.08	3.01491	61.115	61.7779	58.9617	59.5244	7.32722	191.843	196.127	195.06	201.929	19.4835	263.999	266.108	273.878	284.222	20.0653	287.997	280.476	273.917	274.607	37.1695	2212.12	2165.25	2327.22	2216.35	91.9976	9332.87	9029.48	9091.8	8712.75	128.268	9452.06	9285.52	18920	18969.7	155.121	39152.7	21609.4
17.5134	49413.1	26025.6	137502	21.5244	35110.9	20218.6	103720	2.29637	3823.91	2714.16	9630.39	2.36684	49.9497	48.0234	47.7876	49.5465	9.69702	258.84	250.464	266.406	270.566	14.4143	208.033	213.038	209.635	199.483	24.3368	318.64	320.747	335.302	332.37	54.172	3320.33	3245.3	3357.49	3157.58	94.2374	9111.68	8848.94	9694.31	8967.58	121.065	8673.71	8892.07	17555.7	18072.5	153.296	39551.9	22975.1
7.32112	20938.2	10785.1	57766.1	23.9949	37128.5	22256.9	116127	2.94046	4610.64	3285.17	12798.9	1.97794	42.177	41.7603	39.3823	39.5372	8.57946	240.876	229.497	232.389	238.958	15.4392	218.201	218.808	221.842	207.801	26.6808	374.412	367.808	369.182	364.136	45.6855	2794.79	2681.65	2781.54	2613.64	70.6878	7015.03	7204.53	6774.02	7026.9	110.339	7973.16	7728.53	15730.8	16452.6	160.32	38429.4	24484.2
15.0427	42189.9	21773.2	108870	15.2543	24536.8	13885.9	73195.2	2.70342	4183.38	3305.5	11137.7	1.29749	26.5103	25.6568	27.5328	26.1919	8.19335	231.393	225.856	225.141	224.189	15.1533	205.106	222.832	214.029	223.253	25.1718	343.117	358.51	345.486	357.97	31.0889	1906.73	1941.31	1867.22	1905.9	92.1543	8924.9	8907.41	8809.39	8683.4	138.264	10549.9	9335.64	21093.6	20466.4	178.005	42493.7	25560.2
5.66442	16178.5	8643.93	40542.3	19.6489	31238.4	18837.1	92853.6	2.1806	3393.54	2658.09	9465.65	1.97857	41.43	42.0087	40.8919	39.9354	7.83582	215.114	204.439	208.349	220.535	19.2245	283.731	285.256	277.167	271.262	29.4324	406.448	424.954	385.869	409.079	43.4945	2675.22	2714.65	2600.75	2557.84	91.4701	8686.34	8946.56	9040.22	9442.94	115.665	8254.27	8356.04	16591.5	16840.3	189.605	47475.2	26989.1
13.1813	38316.3	19199.6	95564	37.668	57876.5	35520.7	191260	2.24108	3463.44	2537.66	9225	2.932	58.032	57.136	57.8727	58.2802	7.19512	194.632	188.279	200.658	190.857	19.0446	275.205	271.493	260.096	256.639	23.8277	332.92	312.02	336.605	333.26	37.212	2239.99	2125.78	2280.01	2272.31	88.8813	8782.69	8514.28	8405.55	8876.09	139.597	10237.8	9525.13	19596	21377.6	198.181	47451.4	27982.6
10.0399	27194.9	14834.5	77317.3	22.0065	35947.4	21513.5	109611	2.60867	4282.72	3188.23	11102	1.20269	24.6617	23.7698	23.8656	23.5978	8.42911	222.595	221.41	235.943	233.816	13.7303	187.803	191.39	199.052	190.254	23.2145	307.173	333.96	333.226	310.639	59.6642	3653.75	3643.57	3481.58	3528.25	70.7365	7272.46	7109.76	7194.8	7068.54	115.077	7972.41	8113.63	17530.3	17630.9	155.665	38625.6	23186.9
5.54467	15750.5	7803.51	40443.5	17.8768	28291.8	17479.8	89235.3	2.13447	3456.68	2541.13	9352.22	3.92144	81.7467	82.3496	76.3213	79.2933	6.83163	187.164	181.686	179.124	179.871	13.1265	190.387	180.292	181.564	181.18	27.7791	400.736	366.664	380.494	369.785	49.8353	2876.94	2988.66	3102.7	2989.69	90.4515	8516.3	8734.41	8556.95	8814.32	121.917	8511.06	8871.61	17644.6	17383.8	156.836	37318.9	22288.5
19.6481	57362.3	27883.6	153267	18.3139	28839.5	16951.3	87286.7	2.33758	3590	2765.02	9517.98	3.93706	78.0351	78.6608	80.6982	81.2952	8.8314	245.702	242.173	226.7	235.682	10.6109	155.981	156.634	155.829	153.81	25.9983	364.828	369.218	355.359	373.115	53.3018	3319.76	3229.88	3142.96	3208.65	73.8056	7049.24	7432.69	6982.35	7357.84	120.848	8861.71	8435.03	17458.9	17665.9	153.322	39273.2	21762
8.30292	23144.2	12618.4	62711	16.1014	26322.8	15638.8	76665	2.17552	3603.64	2519.94	8724.89	2.72818	57.6582	56.5265	55.3006	57.0618	9.63589	264.864	249.409	269.428	251.96	11.3544	155.068	163.573	167.979	156.195	22.5329	316.593	314.179	298.688	313.285	54.1797	3159.24	3149.1	3148.46	3293.17	99.5688	10050.2	9552.94	9681.37	9474.51	119.649	8745.91	8220.86	17081.9	17440	176.139	42227.8	25688
5.78966	16484	8750.88	41824.3	19.4522	30515.4	18929.5	94819.4	2.00436	3193.51	2348.84	8275.62	2.3993	48.1272	47.0107	49.6149	48.7179	7.78814	216.725	209.887	215.642	213.858	19.7944	284.774	289.675	281.382	287.743	20.344	280.86	289.326	273.743	282.483	59.5155	3576.63	3526.06	3596.13	3567.56	98.4576	9277.01	10143.8	9719.48	9503.36	137.936	10089.4	9631.99	20692.7	19770	193.029	48195.3	27966.2
18.837	51099.8	28007.6	140157	30.9999	51154.2	28441.8	147693	2.45506	3752.33	2965.44	10576	3.29668	70.3045	70.5069	66.8829	66.6309	8.3457	215.599	229.01	215.027	219.495	18.087	254.44	244.454	250.875	245.693	20.1802	284.119	271.773	279.035	273.439	58.8755	3623.43	3473.76	3385.17	3682.75	67.9788	6542.97	6737.86	6764.68	6563.7	118.677	8341.46	8730.88	16547.5	18205	164.9	42820.8	24411.2
5.04038	13494.9	7376.75	37198.8	24.6066	41075	23951.3	125503	2.53704	3943.09	2936.73	11135.7	2.3341	46.063	47.9606	45.9704	47.7265	8.13047	221.978	212.042	208.647	215.695	10.1968	145.918	145.469	144.451	138.957	20.207	280.712	285.557	283.82	292.15	47.139	2848.64	2949.99	2925.93	2794.69	68.5348	6773.38	6535.12	6786.68	6555.65	136.096	9836.81	9707.2	19735.5	20483.5	167.973	39959	25364.4
7.26604	20243.5	10454.4	55361.1	21.13	32803.1	20635.7	102358	2.81605	4367.57	3302.6	11596.5	1.6178	32.5077	32.7223	32.2038	31.8611	7.19628	190.705	185.98	189.974	197.747	15.9868	217.354	220.023	221.994	232.723	28.659	378.494	396.37	385.501	385.574	34.7294	2017.67	2141.89	2166.3	2163.4	72.7844	7195.57	6987.44	6971.63	7100.34	127.329	9721.43	8801.91	18044.1	18501.1	189.247	48954.6	26942.2
16.3116	45568	25129.7	122737	15.6431	24051	14148.7	73952	2.72425	4237.18	3298.73	11210	2.81699	60.0741	57.8901	59.6774	57.5754	9.07936	239.57	243.408	250.161	247.041	10.5533	147.457	155.999	142.8	152.696	26.979	353.444	383.036	373.16	384.613	57.4495	3579.46	3503.05	3412.33	3316.08	63.0795	6125.73	6441.54	6099.51	6006.58	117.437	8263.44	8193.5	16908.6	16803.9	164.429	40009.8	25170.9
9.05329	26088.5	13614.2	69523	24.9145	38084.3	24327.5	124923	2.77997	4338.39	3319.86	11928.9	1.17632	24.6257	23.8767	24.0215	23.5726	8.6419	235.53	240.902	228.807	231.807	16.0669	235.446	235.46	237.634	220.808	27.3957	363.128	362.059	370.991	371.35	42.3157	2439.38	2632.62	2524.46	2619.81	72.99	7037.18	7555.2	7297.61	6986.66	122.475	9363.86	8372.16	18706.4	18593.5	179.614	43393.4	24993.3
19.8912	58005	28173.6	150318	29.6128	47608.4	28676.6	144746	2.35686	3851.15	2647.63	10425.4	2.54867	52.7848	51.5004	53.9571	51.6934	8.0609	222	220.535	210.119	214.36	12.135	168.894	165.403	166.734	177.111	24.203	347.218	348.928	344.051	320.176	40.8934	2450.78	2332.31	2541.7	2565.96	69.2828	7155.42	6508.8	6533.37	7150.93	106.793	7731.64	7584.26	15303.1	16294.3	189.727	47461.8	27153.9
19.0011	51571.7	28325.8	144834	35.8736	56704.5	32184.7	184517	2.25025	3561.68	2701.3	9733.55	1.56259	30.7439	32.472	32.3498	32.9948	9.67416	251.751	259.128	257.492	247.631	13.0768	182.572	194.156	179.515	177.144	20.2625	277.735	287.901	279.853	292.553	31.7013	1885.39	1922.4	1831.17	1852.68	93.813	9545.4	9352.05	9364.65	8861.18	143.093	10408.9	10110.1	20697.1	20973.7	199.858	51166	28363.3
9.11897	26146.5	13851.6	70620.4	35.6932	58049.3	33118.2	172179	2.10489	3403.44	2364.99	9072.78	1.07372	21.8076	21.5998	21.2153	22.0428	9.47941	264.183	243.917	251.298	256.502	17.7469	249.511	245.989	250.046	262.779	20.3161	268.581	285.019	267.776	281.908	56.2695	3385.27	3424.6	3309.8	3427.29	82.871	8369.32	7870.46	8271.67	8153.83	118.178	8573.73	8557.7	17902.2	17302.4	161.022	40056.2	23897
11.6172	33016.1	17039.6	84377.3	9.11634	14044.5	8369.99	46914.8	2.05492	3145.55	2382.13	8883.39	2.58041	54.5041	53.1265	55.2126	52.1374	9.1134	256.864	255.638	245.433	243.768	15.6736	213.106	211.003	232.538	210.947	26.123	376.151	365.709	368.754	348.933	39.4626	2371.91	2261.84	2257.25	2418.22	71.1944	7327.75	7023.82	6778.8	6909.04	131.923	9945.39	9520.85	19628.3	19771.4	154.074	37800.9	22512.3
16.7501	45613	25122	124198	10.6195	16998.6	9912.84	52801.7	2.54334	3839.22	2879	10618.6	2.13112	44.7779	45.0282	45.6858	45.5124	6.04343	166.31	164.885	155.531	162.63	12.8967	181.809	180.553	180.393	177.418	25.5546	351.07	339.199	348.34	343.334	47.2925	2737.44	2741.38	2915.42	2867.02	83.83	8316.95	8421.1	7896.3	7918.43	116.239	8668.51	7880.4	17178.7	17265.7	156.573	40486.4	23827.1
5.70204	16209	8407.43	44823.8	36.952	60568.1	33806.2	182315	2.55377	3952.46	2949.63	10972.7	1.18974	23.7313	23.565	25.5798	25.0377	9.13317	252.403	246.745	240.681	257.209	18.5923	262.823	274.154	259.495	263.586	26.326	368.463	356.68	377.483	345.318	45.3128	2793.03	2618.09	2720.27	2668.25	88.7213	8520.65	9107.49	8747.77	8498.21	108.507	8079.02	7860.27	16514.2	15480.6	186.638	44833.1	26259.7
12.2475	34410.8	18557.6	94768.3	9.92534	15588.7	9418.36	47396.1	2.83092	4522.46	3362.52	11507.5	2.42052	51.7243	51.5261	51.2129	49.0366	5.49851	155.352	146.966	149.123	143.166	18.2237	264.068	264.581	264.553	249.92	21.666	301.572	297.732	285.468	302.254	33.8273	2081.44	1985.59	2103.55	2100.27	95.7748	9042.16	9636.81	9702.25	9257.58	109.196	8239.7	7419.18	15232.8	16230.7	185.714	44977.1	26864.1
19.7388	57454.1	28192	144133	28.0799	43807.7	26239.3	138171	2.49359	3910.98	3046.03	10144.8	4.71801	94.479	97.6949	92.8221	94.6498	5.98671	162.018	164.446	153.372	160.088	17.7202	239.025	239.533	258.326	257.673	27.1661	387.502	373.261	370.697	359.319	41.8504	2472.82	2506.12	2591.24	2517.43	90.6256	8798.65	9203.15	9129.25	9107.55	116.404	8190.12	8498.26	17088.1	17227.9	172.697	44401.2	26122.7
14.4237	41168.9	21741.4	112462	24.4621	40157.6	24179	123460	2.05231	3294.96	2290.14	8334.28	4.76847	102.083	97.4609	93.5245	99.8229	6.1744	167.797	170.514	170.755	163.519	11.5708	161.482	162.417	163.149	162.858	22.1993	318.422	293.353	311.452	292.869	49.6242	2982.88	2876.5	3026.14	3109.63	62.2679	6099.94	6336.49	5864.91	5897.4	121.869	8729.61	8868.7	17881.2	17021.3	186.481	46387.4	27788.7
8.4253	23844.3	12630.4	61992.5	38.4516	63491.1	36530.9	198035	2.67802	4445.16	3246.68	11357.6	4.84033	103.265	103.747	103.47	96.645	8.50283	227.319	219.241	222.237	234.944	13.4617	198.433	187.667	196.424	186.517	26.0489	362.955	356.208	362.41	367.475	39.6288	2358.17	2415.8	2315.35	2406.71	89.8438	9268.64	9011.12	8634.5	8668.34	127.738	9211.74	8615.54	18638.2	18395.9	179.347	46610.6	26120.5
10.1155	29706.9	15314.9	79127.5	22.1401	33683.2	20064	113287	2.20867	3381.72	2685.66	9628.88	3.39234	66.7106	72.2417	72.1478	67.894	7.70198	202.434	201.094	213.097	200.37	15.8859	226.014	222.027	219.114	227.377	26.8179	367.712	381.839	368.699	357.918	52.2413	3240.78	2995.28	3254.53	3278.37	86.6668	8630.97	8873.41	8875.38	8515.37	127.183	9030.14	8949.64	19190.6	18248.6	167.303	39932.6	23434.5
14.4024	38647	21864.2	106035	34.9317	55427.5	31586.1	177349	2.18102	3456.93	2483.23	9206.19	2.25916	44.7307	46.0481	47.8914	47.6292	9.05717	245.851	249.958	238.004	249.765	19.808	284.811	270.2	278.54	277.21	21.7544	304.013	291.172	285.727	301.162	56.2522	3498.97	3244.53	3364.49	3273.14	89.7294	8684.39	9246.66	8982.1	8453.7	143.008	10555	10457.8	20514.8	20457.2	195.185	46543.5	28547.5
9.3778	26228.3	13109.1	73232.4	15.7604	25730.2	14256.5	79549.2	2.92302	4857.59	3418.95	12676	3.08717	60.422	65.8435	65.1256	65.6737	9.088	241.37	232.738	250.644	241.084	10.4379	143.001	144.297	140.566	142.867	20.3323	270.53	276.282	280.811	269.218	46.6558	2871.21	2737.69	2714.75	2849.75	60.9748	6281.71	6028.52	5768.95	5899.6	144.89	10828.4	9820.42	20522.2	21199.2	163.021	40737.6	23997.5
17.2635	47381	25462.6	128136	16.3553	26782.8	14940.1	83688.8	2.26597	3580.47	2724.21	9820.41	1.13132	24.0895	23.0361	23.9105	22.3808	6.96846	178.402	185.908	179.538	178.413	17.3925	257.779	239.437	250.573	239.959	25.909	369.254	344.274	354.262	366.051	36.1135	2189.86	2235.12	2209.97	2177.67	94.1947	9149.62	9526.44	8903.26	9038.18	140.976	9838.86	9416.71	19878	20169.2	196.781	49026.6	29272.5
15.3032	41636.6	23104.4	114916	27.2263	44954.5	25203.6	139391	2.57292	4172.85	3102.62	10740.7	3.09445	61.9184	60.689	64.1945	65.8759	7.28775	187.476	195.821	195.387	200.048	11.9544	172.31	163.081	171.629	166.766	20.3204	273.531	274.804	284.474	276.073	32.7383	1897.58	1938.08	1903.76	1878.76	92.1494	8715.59	9418.99	8891.79	9101.84	119.357	9107.92	8617.64	17442.9	17762	181.956	44891.4	25937.1
15.1707	43015.1	22424.9	110397	10.2924	17274.8	9212.94	49147.1	2.35896	3717.32	2835.18	9761.04	2.17365	43.4505	46.1401	43.5326	46.5912	8.03851	216.741	225.971	221.916	216.252	17.7218	248.554	249.19	253.623	248.934	22.8028	315.415	310.324	319.468	321.438	51.2994	3076.5	2976.32	3059.81	3115.74	63.0309	6145.14	6537.69	6206.9	6452.97	140.627	10742.3	9548.35	20154.7	20817.7	167.433	40829.7	24740.8
16.9945	48637.6	24207.7	126545	32.5757	50140.4	30843.2	163242	2.94805	4640.13	3442.49	12801.7	3.17699	62.1172	61.9683	68.2509	65.3519	7.20748	194.084	200.466	189.338	201.855	16.3027	224.75	225.483	232.433	230.388	22.1982	304.646	311.435	292.953	319.106	39.9494	2470.4	2376.63	2390.11	2365.05	78.1813	7611.27	7979.66	7481.22	7750.91	104.662	7886	7603.96	15875.8	14645.1	178.856	45515	26476.2
16.9264	46868.7	26069.1	121288	31.2638	52008.8	30318.1	160245	2.86376	4547.28	3328.61	11959.8	4.71933	99.1455	98.0158	97.8465	97.562	8.74117	230.769	243.953	234.206	231.693	18.8422	258.156	279.743	262.642	275.619	20.0376	279.727	264.018	276.988	264.207	35.4807	2073.79	2130.18	2215.72	2158.89	86.5884	8660.3	8203.45	8275.76	8885.59	101.466	7638.1	7047.42	15472	14551.7	198.429	48073.6	28842.2
5.15904	14502.5	7720.54	40419.3	25.8647	42790.1	23694.8	122154	2.85341	4505.81	3491.82	12149.9	1.49682	29.705	30.0067	29.6976	29.1777	5.78161	147.848	152.156	153.899	150.021	18.5716	269.893	273.118	255.391	269.605	27.2193	390.81	378.801	372.011	367.86	50.4687	2999.46	2927.46	3156.56	2992.78	80.5002	7614.98	8158.97	7944.42	7736.49	147.293	11107.6	10235.2	22156.2	22302.2	172.988	43794.6	24539.1
17.3788	47380.6	25315.8	137068	13.2848	21339.3	12836.9	63787.5	2.7409	4229.28	3321.18	11110.1	1.90167	40.4118	37.3243	37.6102	37.2521	6.49705	178.817	180.029	178.745	180.493	11.5036	170.586	156.733	157.988	169.297	29.9806	413.31	411.733	415.799	433.38	48.7409	3028.64	2832.65	3045.8	2987.6	91.2266	9357.74	8923.47	8994.03	9298.14	108.459	7595.01	7552.98	15996.2	15125.2	186.701	46596.9	27609
7.34296	19658.9	10406.1	57526.8	23.7263	38773.4	22213.4	121708	2.1746	3452.71	2662.42	8968.85	3.17862	64.3677	63.4379	67.902	67.2521	7.45818	196.226	199.439	194.342	200.478	13.5189	184.302	182.351	188.161	197.033	29.6457	416.299	406.939	402.579	393.807	43.858	2550.02	2645.67	2573.83	2669.72	88.5152	8494.25	9017.92	8610.73	8359.94	132.713	9811.37	9039.22	19588	18709	198.36	49635.1	28334.8
6.62247	17911.9	9912.32	50281.1	12.9386	20050.3	11921.3	62081.4	2.88445	4768.87	3421.18	11801.8	3.72779	73.2582	75.833	75.3436	77.3266	9.10853	238.957	241.972	251.809	236.088	11.0001	150.158	157.994	150.542	161.566	25.5554	355.125	346.37	335.248	352.487	38.5613	2330.71	2380.11	2237.31	2230.93	64.3862	6319.05	6658.85	6535.59	6298.91	122.942	9315.68	8691.27	17430.6	18134.2	185.477	46405.9	27806.6
17.0932	48429.4	25694.5	123423	32.9643	55106.2	32036.1	161293	2.944	4635.88	3357.76	11870	4.02555	82.7506	82.1622	85.5211	79.166	8.03033	218.94	226.502	214.258	210.26	16.7684	225.967	241.598	235.754	234.918	24.0072	337.065	317.14	341.779	331.894	50.269	3090.37	3154.47	3020.03	2942.91	76.3926	7413.7	7422.04	7846.97	7197.74	131.884	9941.55	9168.1	18614.8	19479.9	179.504	46441.2	26835.3
16.5751	46291.5	23295.7	121955	30.9718	51881.8	29673	147552	2.40226	3954.56	2878.86	10422.8	1.62127	33.8576	34.6791	32.6672	34.1071	9.27034	261.812	253.535	238.606	244.227	11.8126	160.868	161.038	163.681	174.764	26.9976	357.978	354.36	365.192	362.791	51.0374	2918.51	3087.37	3108.29	2980.45	98.5459	9702.9	9515.58	9496.66	10189.9	112.427	8310.44	7588.35	16481.9	16971.8	177.418	43890.1	26395.2
17.3282	49275.6	25678.9	131622	38.6125	64303.7	34798.8	191201	2.21947	3421.08	2523.89	9094.87	3.06077	63.5446	59.7984	61.6431	65.1486	5.98624	166.879	166.546	160.747	165.84	12.8672	189.427	190.809	182.232	179.07	27.402	380.969	385.617	396.276	370.706	37.1229	2155.08	2266.71	2212.39	2273.15	72.8427	7245.82	7266.22	7308.58	7293.65	127.692	8853.59	9223.05	18140.6	19121.6	151.387	38732.7	22965.3
11.5842	31103.1	16828.5	84037.6	12.4873	20545.6	11848.9	58772.3	2.89467	4655.78	3464.74	12356.1	3.09411	64.6765	66.0656	60.3308	65.8327	8.52299	228.911	232.851	234.146	238.022	15.0274	202.287	215.979	212.951	221.034	21.3975	301.506	304.93	300.291	302.399	48.2467	2806.91	2843.48	2859.57	2751.02	82.5889	8241.62	7948.97	7958.79	8523.18	114.431	8740.55	8137.12	17113.7	16745.7	190.428	45668	29076.1
12.539	35594.3	18027.6	96362.5	23.0033	35288.5	20835.8	107433	2.12848	3510.54	2456.9	8566.54	3.08729	66.1057	60.837	65.49	63.2238	7.82537	217.957	208.38	200.85	212.543	14.621	205.507	202.562	205.959	215.403	21.9967	310.399	304.805	303.236	296.016	41.3828	2414.85	2430.75	2436.76	2591.6	68.0431	6745.91	6704	6593.39	6506.76	130.257	9277.1	9082.11	19137.4	19648	175.91	41504.3	25446.5
18.3411	53773.8	26191	134837	25.085	41791.4	24703.2	125173	2.48843	3908.3	2810.51	10647.6	1.34633	28.4768	27.1407	28.6749	26.6779	7.78848	208.639	211.377	213.672	212.779	15.9036	216.703	230.856	234.223	222.33	25.3011	347.88	347.105	359.576	365.003	55.3008	3146.63	3351.29	3144.79	3325.15	61.4451	6276.07	5809.87	6154.64	5948.75	123.953	8971.39	8925.8	18884	17923.3	178.819	42865	25309.8
16.7271	46615.8	24209.9	123239	39.6849	64225.5	36958.3	203664	2.93043	4803.89	3571.93	12071.9	1.45189	31.171	30.6473	29.2393	30.2515	6.05547	169.336	157	166.02	163.687	17.2736	233.627	238.821	246.56	247.854	24.1799	331.839	328.478	324.536	340.397	35.5267	2168.99	2066.52	2149.04	2111.89	77.5863	7651.92	7357.99	7604.71	7409.68	136.151	10379.6	9117.68	19437.3	20068.7	196.198	47358.5	28126.1
8.60162	23224.9	12855.2	63732.1	35.2037	57634.4	32127.5	171565	2.32645	3539.02	2722.47	9604.18	4.92701	103.5	101.271	96.089	96.0434	8.19053	222.904	231.021	221.645	230.926	18.4475	248.967	262.075	258.487	254.574	24.1369	333.211	337.272	346.143	332.643	50.3292	3102.08	3011.19	3112.38	2907.59	90.7904	8869.55	9331.12	8800.3	8731.81	110.61	8367.63	7828.55	15628.6	15794.8	194.521	45877.1	28740.6
13.4004	37155.1	19003.5	95906.8	15.1126	23400.7	14319.6	71132	2.00205	3191.45	2339.05	8641.41	4.08769	85.4263	85.8944	80.7652	82.0606	6.86278	187.458	188.471	183.414	191.772	17.7486	252.801	251.817	259.431	261.307	26.4433	372.858	373.006	370.314	349.249	55.6631	3421.28	3173.1	3287.75	3406.71	85.0041	8637.81	8347.81	8037.31	8531.84	120.144	8479.45	8006.14	16929.8	17928.5	187.955	46969.9	28655.7
14.7243	43109.3	21710.6	111630	20.06	31631.2	18366.2	94455.6	2.12476	3499.68	2423.68	9175.73	4.78664	93.5134	95.8482	94.8718	99.1696	9.58608	249.202	263.342	261.278	256.628	13.0902	193.607	186.903	185.636	185.715	27.6161	378.729	392.521	378.226	376.783	33.9961	1980.41	1987.74	2130.82	2109.85	79.5443	8149.11	8075.44	7656.08	8105.84	116.581	8514.04	8543.1	17356	17181.8	188.115	48515.2	28743.9
18.9361	55570.8	28463.5	142530	38.7101	60290.5	37081.3	183371	2.27859	3773.04	2570.99	9657.09	4.00766	84.7034	78.5348	82.0327	79.5165	8.76572	228.079	224.647	238.944	234.821	12.2463	166.758	170.197	178.395	164.989	22.2594	303.1	315.192	312.099	306.535	54.1838	3318.72	3169.31	3134.1	3242.92	88.6031	8452.42	8573.74	8531.72	8708.14	142.411	10327.6	10275.3	20746.3	20780.9	175.065	43193	24529
16.9798	46405.2	24158.9	123625	38.3707	61177.1	36158.7	191812	2.66897	4356.29	3195.48	10718.8	4.38635	87.2562	93.8102	88.5535	86.4749	7.68948	210.93	202.897	216.459	207.989	11.6898	162.371	161.454	166.024	161.954	28.6109	392.985	407.675	395.607	401.928	31.2403	1823.56	1920.87	1948.82	1874.62	83.3431	8428.67	8374.56	8104.78	8478.47	109.788	7682.09	7351.29	15456.5	16648.2	199.075	50911.5	29816.9
16.9283	46662.1	24680.8	132615	36.3088	59585.9	33249.2	170908	2.06439	3411.37	2426.4	8503.71	1.64807	32.2876	34.6275	32.8131	33.8639	5.09965	131.756	133.447	139.515	142.65	14.1487	196.576	208.277	192.608	196.784	26.8056	367.813	373.029	383.999	379.162	53.5388	3233.3	3226.32	3080.74	3313.65	68.5972	6457.27	6798.11	7080.1	6972.22	106.597	8132.85	7148.36	15468.5	15798.2	194.52	47142.3	28579.5
18.121	50156.7	27457.4	131885	31.9909	52298.8	31496.7	157557	2.75784	4398.88	3323.66	11443.5	1.75925	35.3741	34.3757	34.9049	35.5627	7.1025	192.094	198.086	181.829	198.805	11.6593	167.739	159.686	166.659	161.995	21.2927	290.947	293.477	287.23	297.301	59.9177	3675.76	3610.67	3688.28	3633.77	97.8441	9488.74	10047.7	9511.69	9208.02	111.584	8418.25	8167.73	16543.2	16808.1	160.387	38774.1	23978.1
14.3042	38984.4	20667.5	109770	9.97862	15441.5	9393.49	48206.5	2.15429	3285.41	2553.49	8722.69	2.58994	52.3408	51.4427	53.1903	55.1182	7.56457	193.916	195.084	210.154	208.405	15.4272	215.353	213.789	216.504	225.609	29.1172	409.571	399.932	396.944	416.828	56.0273	3474.86	3192.17	3475	3446.39	84.4335	8413.2	8127.51	8235.03	8719.86	117.449	8683.47	8365.49	17402	16461.4	156.068	39083.4	21855.7
17.5727	48767	25940	134463	13.8581	23234.8	12518.7	66765.6	2.067	3210.27	2370.45	8889.55	1.52168	30.9951	30.5363	31.0178	30.1241	7.94756	222.923	212.291	217.467	221.409	10.4365	144.758	144.044	151.614	151.266	29.1723	399.992	400.386	400.414	398.108	36.5255	2131.68	2125.87	2163.13	2098.14	83.6365	8462.41	8151.33	8015.22	8478.98	147.161	10792.9	10528.1	21208.3	22424.4	160.342	41593.7	23211.8
16.7957	49248.2	25447.8	120824	29.5589	49381.3	26763.8	147485	2.78985	4263.78	3234.71	12011.9	1.9765	41.0352	40.4446	41.0545	39.8198	6.90128	186.064	186.009	190.428	187.462	16.3709	239.923	227.261	230.232	231.51	29.2674	385.343	423.034	383.245	419.05	43.3512	2613.49	2643.01	2591.05	2526.65	89.2577	8714.46	8838.59	9258.72	8959.28	113.359	8378.9	7901.32	16227.6	17276.8	189.322	46822.1	28480.2
10.2035	29946.5	15479.5	80069.7	36.7442	58401.1	34128.6	182148	2.20645	3426.46	2597.5	8906.11	4.81882	99.4264	95.1981	96.0494	100.627	5.88672	164.004	154.072	155.004	151.465	14.2365	208.586	210.478	209.561	207.474	28.6078	380.721	410.723	406.888	382.701	58.8498	3640.01	3454.31	3435.55	3559.24	74.0976	7513.44	7504.3	7554.2	7615.97	119.98	8484.82	8299.79	17129.4	16796.7	172.031	43404.4	26074
7.85982	21981.7	11020.6	59266.5	25.7403	41747.7	24432.9	123969	2.53222	4086.94	3002.19	10674.6	1.55998	32.6047	31.5391	30.7855	33.3767	7.57236	204.215	207.394	209.162	193.652	12.9115	182.343	183.889	183.697	188.561	25.1376	333.358	358.947	337.868	347.413	42.1837	2553.7	2551.5	2507.41	2479.73	79.0192	7450.73	7694.98	7653.27	7492.95	111.859	7892.04	7554.02	16875.3	15649.3	166.68	42653	23981.6
11.3108	30862.8	16388.8	86181.3	18.8259	31172.7	18319.7	97044.5	2.99507	4530.29	3554.69	12332.8	2.57727	51.803	53.6356	50.9694	54.3849	7.78001	209.002	201.099	209.386	204.68	16.7281	244.635	235.452	240.78	226.564	25.8028	353.416	338.885	369.542	355.613	34.8424	1993.81	2041.84	2020.06	2122.01	96.4464	9314.23	9428.18	9216.78	9713.05	142.073	10858.7	9988.56	21491	20979.8	189.696	46670	27288.9
15.8237	45100.2	22609.6	121990	10.5289	17127	10284.3	49318.7	2.2229	3410.23	2529.27	9388.73	2.51437	52.8162	53.4665	51.3557	51.8519	8.09868	223.827	211.472	216.499	211.494	13.9402	205.345	188.716	202.659	204.379	21.5851	284.31	294.287	299.357	287.058	47.5991	2824.12	2887.64	2905.45	2858.06	72.6539	7205.74	7050.56	7289.07	6960.25	137.961	9763.86	9700	21166.1	20706	198.836	49841	28001.3
7.86708	21239.2	11847.7	61119.9	32.0903	49392	31071.7	160735	2.34111	3875.06	2871.04	9613.58	4.74942	100.384	97.9349	93.8646	95.7349	7.54214	202.591	199.597	206.069	198.324	13.2415	194.333	178.602	187.089	192.827	25.4188	343.999	335.205	353.794	364.12	35.0896	2012.55	2201.83	2113.59	2143.52	84.7952	8398.8	8558.78	8351.09	8563.25	134.556	9509.51	9214.07	19866.8	20248.7	170.019	41852.2	23823.8
10.9968	29677	16735.5	85564.3	9.12757	14777.7	8247.15	44926.5	2.00316	3206.78	2242.3	8584.68	3.5976	70.6005	76.7219	75.3458	72.441	9.07994	252.858	243.011	240.983	238.688	14.5117	208.794	209.349	209.043	200.329	21.2364	286.171	301.302	296.61	292.599	53.3146	3170.67	3260.47	3095.97	3073.04	71.8956	7418.68	7111.47	7027	7441.38	132.162	10008.4	8867.82	19042	19418.9	167.507	41923.1	25257.2
18.3998	49160.5	26468.5	139695	39.2556	62777.1	36882.5	191861	2.0945	3263.63	2521.05	8690.73	2.00202	39.2312	41.4351	42.8103	40.2435	7.84167	214.627	216.406	213.392	218.988	10.3912	149.384	149.389	141.365	141.622	22.7749	327.075	315.321	327.409	304.689	49.7445	3009.34	2931.99	2971.03	3081.68	97.9083	9971.56	9985.04	9668.78	9241.45	104.154	7349.87	7567.29	15081	15145.4	173.729	43348.2	26405.2
5.95932	17183.5	8780.91	44016.8	28.9111	44912.3	27090	147076	2.05679	3305.33	2409.39	8679.19	3.35771	66.626	70.868	67.6364	66.4825	8.46478	222.575	238.886	234.469	219.986	16.0938	230.029	222.754	238.5	229.244	21.509	290.738	301.81	310.29	301.635	59.2943	3687.64	3449.07	3603.39	3606.72	97.0178	9873.89	9592.65	10036.4	9761.35	135.842	9417.71	9847.98	20379.3	19299.3	166.038	43146.8	25273.7
6.7305	17977.8	9898.14	52604.8	18.2322	30233.6	16618.8	91771.3	2.08118	3279.73	2431.6	9202.4	3.98583	81.5925	82.1593	80.3071	80.1773	7.06112	197.89	194.215	198.109	194.427	15.6212	222.609	217.338	217.186	227.862	27.1407	364.8	359.217	361.268	366.499	32.0267	1853.06	1984.89	1963.59	1872.07	85.9108	8743.7	8429.34	8152.54	8135.75	122.786	8796.43	8828.89	17695.8	18788	155.279	38446.3	23268.8
15.5051	45341.3	23284.1	120938	29.9435	46583.3	29462.9	147628	2.04508	3184.71	2438.02	8701.52	4.71406	96.3118	100.498	96.0912	94.4455	8.79633	231.521	233.628	239.338	233.652	13.3011	183.839	192.89	187.989	185.75	22.6519	323.001	324.945	316.115	315.144	44.5654	2792.13	2533.32	2614.1	2724.78	62.5731	6207.33	6085.79	6338.31	6235.95	117.463	8230.65	7946.91	17233.8	16340.3	179.086	42835.5	25583
8.49189	23836.7	13061.3	64510.1	15.5177	25527.5	15252.8	76394.8	2.71257	4300.91	3269.14	11957.9	3.18789	62.4222	65.0067	64.8896	64.6848	8.95922	234.124	251.312	246.231	243.918	17.7136	261.382	245.514	262.436	240.126	23.4874	336.032	334.291	310.199	313.784	34.4506	2006.62	2061.83	2147.85	2080.67	87.6108	8339.12	8915.73	9085.26	8239.02	120.56	8511.08	8122.66	17631.8	18026.4	191.915	46775.1	28426.7
8.0022	22110.4	12325.5	58099.1	33.0865	54631.2	30928.2	167331	2.24645	3634.72	2710.79	9017.28	1.75399	35.2391	36.2876	37.1603	34.6797	9.09098	246.016	236.852	243.133	248.774	16.6287	228.338	239.558	227.518	239.879	28.316	406.033	373.529	377.55	403.633	38.631	2337.3	2367.74	2216.75	2282.9	79.8721	7867.74	8042.17	8157.13	8160.73	142.28	10640.2	10040.2	19818.2	20209.8	163.658	39368.2	23952.8
10.9325	31979.6	16456.5	80560.6	22.3866	37005.7	22117	112472	2.36433	3694.24	2894.05	9804.86	4.44196	88.1341	90.2691	89.258	87.3748	9.31878	262.119	245.1	243.681	241.647	11.8646	174.917	161.289	167.905	175.255	21.5394	295.764	284.046	288.988	305.742	34.4097	2121.4	2140.64	2061.79	2115.22	95.0449	9545.66	9363.76	9371.73	9685.75	126.037	9562.03	8598.83	17791	17860.1	171.459	42962	25339.5
10.001	27903.1	14883.7	77053.1	18.2363	29531.1	17018.3	87995.4	2.94701	4850.17	3414.02	13035.6	2.33269	49.8943	48.814	48.8475	50.0757	6.53711	182.715	167.849	170.941	171.103	11.8833	168.052	161.878	163.969	170.25	26.3868	352.837	376.294	372.878	357.923	47.8474	2909.42	2881.33	2849.29	2900.14	87.1534	8587.86	8386.5	8920.39	8792.33	111.807	7827.6	8097.79	16326.2	17160.7	189.444	47881.2	27153.1
5.20695	14787.3	7319.53	37711.1	38.2364	59706.6	35638	185655	2.62905	4137.4	3232.58	10645.7	1.74819	34.6726	34.5065	36.3274	36.1275	6.49678	176.285	172.013	167.239	170.401	11.1701	162.04	162.022	159.361	157.696	23.8225	326.274	339.15	326.676	330.874	44.3641	2619.57	2562.31	2556.18	2561.13	87.1836	8387.84	8631.53	8364.96	8567.11	132.364	9450.21	9252.26	18518.7	18532.6	183.432	44412.2	25675.9
19.3676	55614.4	28867.2	144934	37.5955	59223.6	36898.9	191167	2.88603	4605.4	3298.24	12714.6	2.95163	59.7556	59.6307	62.7452	62.3735	8.05302	209.732	210.48	225.994	215.835	13.8586	195.12	192.515	201.106	189.758	22.5619	311.53	321.716	319.488	297.161	58.0598	3393.72	3469.09	3559.95	3360.64	84.6631	8396.03	8199.08	8236.08	8476.46	131.751	9352.03	9400.11	19988	19311.4	153.978	38060.6	23420.1
17.5964	46781.9	24577.4	132788	35.116	55569.9	33720.5	164776	2.46197	3713.78	3008.71	10252.7	4.98837	102.952	98.7175	105.638	106.551	9.53337	256.401	260.748	254.588	259.611	11.1859	151.422	163.651	152.37	156.107	26.9696	366.125	382.2	374.259	385.447	40.6809	2472.49	2505.19	2422.02	2480.81	64.2017	6336.45	6087.21	6397.37	6088	100.838	7446.99	7052.44	14246.4	14949.5	171.721	43284.8	25397.7
13.6714	39223.3	20190.9	105318	10.9497	18029.9	9931.39	54709.1	2.30516	3623.52	2789.65	9910.23	2.61995	55.9708	51.9185	56.2318	52.1612	8.05597	227.046	214.218	226.417	209.42	19.5292	265.491	273.649	274.673	276.929	28.0647	376.873	370.795	393.981	396.628	35.3869	2166.34	2009.89	2026.97	2151.18	92.8877	9193.83	9365.71	8864.95	8835.93	138.038	9725.05	9954.85	21104.6	21121.3	155.511	40299.5	22684.8
16.3005	46614.8	25054.9	124625	39.6321	61849.6	38314.7	187618	2.14652	3252.4	2485.45	9478.26	2.98817	59.6086	59.0553	62.1128	58.4187	9.38277	261.302	248.459	246.725	245.346	18.9498	269	272.527	278.614	273.078	28.6773	389.728	405.846	400.902	405.407	48.8483	2815.37	2934.24	2797.74	3046.93	98.8755	9630.15	9895.06	10116.4	9301.88	109.123	7672.61	7897.89	16371.8	16522.2	158.092	41076	22948.7
12.2214	34520.7	17493.2	88152.1	25.1371	39826.3	23653.4	122165	2.56402	3930.95	3158.78	10929.2	1.42806	30.1171	28.3997	30.6554	29.089	6.38127	173.945	164.105	174.697	168.407	16.8476	231.112	248.545	229.345	243.202	26.5881	371.636	350.936	381.234	376.51	52.6679	3084.65	3260.37	3298.51	3167.94	98.1607	9688.73	9587.72	9917.58	10181.2	138.638	9767.76	9250.58	19534.7	19611.5	177.637	43484.9	26032.6
19.3495	54148.4	27709.4	144615	36.3116	59158.8	35025.6	186134	2.41976	3907.69	2810.55	10040.3	3.06812	65.8731	62.5818	60.6247	64.1861	5.80242	150.096	153.817	151.59	159.426	18.7482	260.573	252.45	276.542	273.137	23.4717	308.944	325.117	331.45	334.519	54.4034	3194.09	3394.41	3146.28	3384.21	80.6135	7582.75	8123.68	7567.48	7949.52	136.048	9575.26	9937.58	20251.2	20314.3	174.21	42549.5	26263.8
17.2507	47891.2	24442.6	130191	20.0543	33409.7	18723.8	96981.9	2.79365	4605.86	3280.32	11754.5	1.51356	30.6941	30.9094	29.971	30.9996	5.2681	145.556	138.601	137.269	146.488	19.3746	270.059	265.162	263.011	274.88	20.1565	286.218	285.133	274.408	274.045	45.9251	2688.56	2776.09	2725.02	2681.32	61.3288	5778.77	5882.27	6164.33	6245.91	149.844	10657	10342.3	22586.9	22267.5	174.272	44397.2	25682.6
17.5453	50264.4	24641.5	133756	14.8826	22777.9	14281.5	73213.9	2.60334	4310.52	3118.82	10582.9	3.66473	75.9568	77.4616	75.0476	72.1073	8.21803	229.218	220.838	212.378	227.582	18.3547	249.31	247.908	267.474	249.728	25.776	353.152	340.989	361.077	341.675	51.2977	2919.73	3183.69	3075.25	3052.85	85.1538	8832.64	8510.33	8239.09	8280.4	116.888	8653.5	7811.72	17084.8	16806.9	195.36	47051.2	27279.6
9.50759	25751.6	14269.6	71285.9	30.6659	50232.6	28107.5	157781	2.68409	4455.91	3084.27	11849.2	4.25304	89.9517	87.9214	86.7141	84.5683	7.91514	202.838	212.956	208.647	211.543	19.1072	268.426	278.485	257.428	269.205	27.1418	372.461	390.604	369.447	375.714	52.5547	3207.95	3090.04	3227.84	3099.76	65.4863	6477.57	6349.14	6487.99	6785.24	120.465	8548.83	8791.93	17179.5	17612.2	156.319	37379	23556.8
5.33176	14264.5	7536.08	38962.2	28.2259	47192.1	25536.3	144246	2.15791	3407.76	2477.29	8987.88	3.21536	63.2444	63.234	66.4227	66.4247	8.83822	246.903	233.204	229.679	234.484	15.2876	222.856	206.412	207.947	225.311	23.0774	318.271	311.147	333.275	304.18	37.6241	2262.08	2285.71	2359.09	2166.98	71.7063	6908.91	6989.49	7175.83	6792.94	131.988	9141.27	8837.5	18562.6	19057.8	167.966	39792.2	23634.1
5.01169	13737.6	7619.97	38528	12.7979	20445.6	12293.8	63360.2	2.24029	3395.67	2660.84	9177.83	4.30569	84.801	92.0503	88.098	89.5503	5.93695	158.467	160.67	152.682	164.106	19.4924	283.457	286.194	268.764	284.05	22.7189	297.633	300.726	325.305	316.839	32.4827	1850.16	1845.26	2016.63	1941.65	91.9393	9119.84	8643.93	9260.31	9502.34	138.909	10585.8	9788.91	19481.4	20291.1	172.437	42417.7	24682.8
10.2792	27842.8	15640.2	79372.1	22.024	34248.4	20476.6	110417	2.19115	3433.11	2576.53	9341.69	2.33126	47.5677	49.1837	47.4012	47.1332	5.11732	133.457	134.533	144.312	136.236	10.9967	153.654	148.827	148.962	151.124	23.3134	330.368	324.828	325.381	313	58.3671	3442.72	3620.48	3422.7	3494.08	65.2083	6254.05	6659.86	6338.53	6609.96	136.411	9686.84	9189.36	19689.6	19341.9	159.679	38906.6	22201.8
9.2008	25430.6	12961	72631.3	36.8894	58855	34588.1	180580	2.06056	3178.53	2393.91	8807.99	4.85995	97.6596	95.5959	94.9031	101.793	5.36705	140.813	137.814	140.603	148.001	17.7418	249.23	254.941	238.614	259.793	21.4312	288.5	304.088	281.711	295.812	43.1482	2489	2535.46	2605.85	2452.84	65.4262	6251.52	6488.7	6395.98	6771.14	121.414	8406.81	8647.85	16933.4	17534.7	196.283	47181	29130.6
14.1706	38038.3	20335.2	110855	18.5929	30716	18347.1	86997.7	2.90489	4558.71	3283.08	12659.8	3.16503	63.6747	66.2099	63.5597	64.6662	6.68761	186.78	180.59	173.267	181.327	14.531	200.491	208.266	211.07	198.914	26.3918	362.018	373.137	377.118	360.731	46.954	2705.75	2732.99	2797.73	2756.52	85.8143	8069.55	8639.36	8255	8803.67	124.533	8792.6	8526.86	17676.5	18592.1	181.439	44828.5	26773.9
10.0013	27881.6	14238.7	73934.9	29.0126	47100.4	27067.1	137473	2.54175	4179.89	3047.33	10359.5	1.45344	29.0902	28.8179	31.0355	31.0661	7.34461	202.178	197.49	195.681	197.38	17.8025	252.622	242.611	255.773	262.028	26.9345	356.476	363.157	385.11	364.132	44.2337	2629.27	2740.84	2557.98	2723.13	88.0331	8634.18	8628.32	9010.43	8676.43	129.29	9409.63	8780.5	18239.8	18987.3	185.378	44342.5	28233.6
15.03	40635.5	22628.1	111971	39.8037	64356.9	36326.7	198619	2.06281	3244.64	2453.45	8825.17	2.26478	46.5305	46.5252	44.1232	48.6283	5.44456	140.775	141.487	142.051	140.749	15.4818	220.321	209.414	214.453	210.671	24.6001	351.388	331.956	335.206	354.527	44.886	2756.94	2632.88	2555.75	2743.59	88.5217	8699.78	8403.24	8934.18	8722.37	136.509	9822.84	9700.3	20140.9	19243.2	173.512	44100.8	24269.1
6.76229	19613.4	9771.03	48921.3	36.0803	58121.8	34789	181031	2.51159	3813.43	2870.43	10219.2	4.04786	86.6748	86.7868	86.7091	83.6002	7.78413	209.865	216.416	206.521	205.586	16.1914	238.21	238.102	234.337	239.259	28.2049	396.483	369.562	370.344	373.138	56.0612	3377.78	3369.89	3344.46	3400.76	62.5086	6302.74	6379.46	6138.03	6233.12	135.787	9848.36	9770.31	19976.5	19636.7	176.722	44775.7	24764.8
16.689	48530.9	25227.8	125967	37.6665	62815	36277.5	177479	2.39416	3845.07	2939.9	10275.3	3.46409	72.2331	72.5	74.2615	74.3726	9.89071	258.799	274.578	275.907	259.75	15.9092	230.683	221.567	234.548	232.275	21.9308	288.529	303.892	303.194	293.612	57.8654	3417.41	3509.25	3607.39	3596.58	98.6893	10142.6	9305.09	10043.8	9548.49	133.101	9657.09	9518.33	18694.4	18673.4	153.491	37649.3	22706.9
7.81768	22199.8	11864.7	56953.2	28.1798	43415	25368.9	134076	2.78607	4270.3	3311.27	11548.6	3.00779	59.882	59.2334	60.4175	64.0737	7.53654	203.531	208.244	193.485	210.952	15.1218	214.74	206.44	209.623	212.337	23.9497	320.548	343.266	314.964	333.651	57.559	3387.68	3498.86	3304.26	3383.94	97.7997	9332.68	9268.54	9773.7	9712.66	131.496	9627.21	9624.13	19780.9	20039.1	154.946	38705.5	23104.8
18.77	55101.5	27235.6	137720	10.5482	17286.6	9992.4	51715	2.75161	4407.37	3313.82	11760.7	1.51194	29.4756	30.1524	29.9779	31.6104	5.36509	138.228	139.765	143.804	140.05	16.8285	233.039	245.454	233.75	239.755	20.606	276.289	290.562	289.311	286.284	37.3844	2288.04	2152.92	2233.46	2202.04	71.3537	6809.14	7390.43	6807.25	7154.39	104.45	7956.54	7116.02	15340.8	14865.5	180.805	45191.4	26345.4
14.2393	40987.2	21245.1	110416	37.5631	58652.1	37075.3	176171	2.20117	3573.58	2695.92	9389.02	1.10364	22.4637	22.2854	21.9213	22.8059	6.52584	173.487	181.053	181.666	177.051	19.0867	258.585	257.164	263.023	265.123	23.0404	319.715	316.512	317.251	316.671	35.3537	2208.07	2090.7	2158.01	2196.94	70.1345	6620.95	7266.85	7189.77	7035.07	146.561	10995.4	10467.9	21602.5	21920.6	151.272	36295.5	21358.6
15.2376	44748	22519.6	117507	39.9452	62283.4	38588.1	189741	2.1632	3414.38	2539.52	8775.86	3.73467	76.0475	79.76	79.0126	77.7773	6.52948	183.064	178.276	176.892	174.013	16.8651	229.265	227.667	242.288	230.953	23.8549	331.703	344.46	324.042	321.884	34.457	1979.56	2011.17	2089.99	2145.68	62.0986	6193.65	6205.37	6156.32	5853.92	148.4	10642.8	10641.7	22525.6	21291.7	162.752	38822	23801.3
17.5778	49537.4	25258.6	132817	25.0534	38457.7	23155.5	122178	2.24751	3556.09	2753.65	9130.46	4.46866	91.1847	91.6652	91.0046	95.826	9.62653	248.568	249.428	261.277	248.785	13.3314	184.284	191.348	194.96	194.037	25.4692	337.559	356.704	356.126	354.409	42.5748	2647.49	2657.18	2582.56	2648.57	84.5261	8196.91	8108.28	7969.71	8166.69	105.886	7665.44	7503.93	15981.9	14803.7	166.83	42815	24504.8
17.2381	49715.3	26323.1	129056	35.6098	57901.3	31909.3	178955	2.74049	4296.97	3155.28	11999.2	4.13301	82.4237	83.4458	86.3696	83.1681	5.39078	142.277	151.287	150.045	146.611	10.826	155.098	156.987	153.549	147.367	25.7996	372.029	355.657	342.235	372.321	42.0168	2442.74	2551.42	2533.41	2598.28	65.6249	6492.59	6573.79	6231.06	6310.9	121.115	8431.21	8129.02	17005.4	17873.4	161.894	39744	22813.1
10.4527	30373.3	15074.4	75216.7	33.8536	56721.6	33208.7	167110	2.97097	4679.04	3492.07	13149.1	4.33962	84.8345	88.6808	85.0201	87.7566	6.81191	174.964	182.669	187.085	175.624	18.207	245.183	255.654	262.907	258.798	28.4066	381.879	381.444	375.999	393.258	56.0798	3300.43	3375.21	3347.65	3188.05	89.0394	8577.56	9235.68	8552.73	8841.06	108.263	7805.14	7643.75	15389	16004	185.69	44926.9	28060.1
11.4756	31165.2	16385.2	88179.3	37.9519	63524	35732.4	193133	2.67744	4224.29	3200.74	11228	2.53561	53.4854	51.7978	49.6104	52.6921	5.49798	150.666	151.919	141.293	150.398	15.8676	231.434	228.158	221.947	234.528	20.6591	296.793	294.84	288.76	292.708	36.1046	2129.78	2053.86	2195.73	2160.78	73.796	7605.98	7457.1	7474.42	7301.35	107.571	8085.55	7227.59	14956	15144.2	157.27	39533.7	22314.4
12.1071	34311.7	17103.6	90179.4	12.311	18962.4	11995.7	61314.4	2.0794	3410.89	2396.11	8481.87	2.26766	48.527	46.8788	48.0209	45.9264	9.5554	258.122	253.435	261.387	245.144	11.5606	163.899	160.405	162.341	160.033	21.2304	297.735	288.971	287.68	294.004	37.0156	2249.51	2258.97	2299.82	2169.86	94.9517	9577.48	9242.97	8982.38	9467.21	145.725	10113	9965.57	21651.5	22170.7	190.366	46765.1	26702.2
12.8883	35373.3	19393.7	94777.1	26.8852	41532.1	24739.3	136678	2.21074	3336.78	2722.44	9235.69	2.49996	53.1892	53.2335	49.0385	53.6354	9.9167	254.739	266.793	274.096	279.225	10.3343	149.495	142.198	144.383	146.283	27.8507	384.695	368.785	384.136	382.182	58.5754	3563.19	3630.88	3362.56	3494.16	92.9778	9010.9	9226.09	9258.37	8925.54	102.885	7495.53	7439.93	15521.3	15583.5	170.188	41351	24062.3
12.8682	36117.3	18999.6	96346.5	27.6071	45611.5	25528.9	131415	2.92233	4466.98	3493.52	12037.8	3.9091	82.8117	77.3996	79.6345	79.4586	8.17039	212.743	227.821	221.447	228.313	10.1384	136.22	145.918	136.805	150.194	22.0206	318.554	293.349	290.449	297.694	48.9511	3042.02	2808.85	2884.02	3055.36	64.8349	6445.97	6232.13	6213.26	6393.03	109.62	8245.66	8030.49	16753.7	16487.4	164.005	41948.9	23400.2
15.3924	44628.2	21675.7	120528	23.16	37567.1	21095.2	116686	2.0565	3406.35	2453.55	8280.07	2.61781	52.1963	54.04	51.7973	55.5811	5.26864	145.231	135.506	145.484	139.333	19.7803	270.406	267.126	291.76	280.465	26.6889	352.603	371.717	369.637	363.284	38.2582	2345.53	2246.24	2321.59	2244.31	83.2941	8025.6	7876.27	8067.59	7877.59	113.906	8457.4	8119.12	16317.9	16754.3	164.38	42188.9	24772.9
6.01997	16254.6	9174.79	45085	38.0393	62113.4	36383.9	191086	2.10795	3282.98	2449.67	9019.44	2.20482	46.518	44.1993	45.4404	45.1771	5.60551	146.335	154.808	147.787	145.945	12.9606	182.433	186.96	185.373	183.281	28.6985	392.559	414.989	385.373	388.198	32.0073	1960.01	1849.98	1920.88	2001.07	99.8062	9649.86	9441.42	9660	10110.1	134.986	9925.27	9019.31	20282.6	20094	189.044	47894.2	28431.8
12.6155	36117	17647.1	92882.1	33.9171	51841.4	33420.2	171531	2.79034	4303.44	3378.13	11208.2	2.54171	53.7806	53.7753	54.3988	50.2397	8.20369	215.691	231.226	225.326	217.323	13.9578	199.144	202.201	207.115	193.855	22.2151	307.026	295.757	320.768	313.454	36.1964	2246.31	2129.76	2176.81	2150.97	88.3487	8916.4	8864.55	8483.07	9036.16	120.313	8781.57	8064.5	17649.8	17999	171.086	43961.5	25924.1
5.29853	15332.5	7631.04	38822.9	14.4256	23633.9	14049.7	70831.7	2.4656	3884.15	2943.64	10790.1	2.38287	48.8597	49.7276	49.9871	50.4533	8.01187	224.807	215.216	206.845	213.196	18.9415	275.75	276.003	281.07	268.796	23.3219	307.547	329.711	320.962	309.119	53.3886	3080.04	3128.48	3300.21	3115.19	83.4182	8047.72	8237.17	8484.26	8576.43	113.156	8175.82	7826.07	17170.2	16095.6	180.404	46956.9	25471.2
18.5496	52141.1	25928.7	135105	15.6862	24811.8	14259.8	79289.3	2.32269	3864.79	2759.5	10251.4	1.97054	39.4832	39.4924	41.8773	41.8432	9.03508	248.2	250.93	253.906	232.846	14.3623	204.602	202.268	192.961	200.333	23.9931	339.932	332.585	318.984	317.863	41.1022	2377	2447.51	2558.73	2532.36	69.5404	6787.64	6828.82	6821.33	6923.55	106.837	7509.5	7743.85	15057.5	14908	197.729	49632	29506.8
18.8398	54533	26321.5	144455	10.0841	16318.1	9947.91	51902.7	2.97414	4910.68	3505.46	12663.1	1.93522	39.9045	38.6339	41.2551	40.9376	8.27603	232.163	222.227	228.054	220.323	11.7103	168.439	173.466	172.41	170.085	27.1101	355.809	361.528	374.669	368.908	36.1247	2093.67	2234.19	2194.45	2153.77	81.2989	8077.82	7997.36	7902.26	8257.74	145.466	10622	10614.1	21952.1	21227.4	154.196	37858.1	22717.3
10.1129	27505.5	15314.9	76554.3	20.8143	32146.5	19661.5	98383.9	2.77062	4406.08	3401.85	12076.6	3.31024	65.8154	64.5317	65.9083	68.4076	8.6708	238.778	226.316	242.722	243.704	19.0151	271.021	270.737	261.936	280.927	24.2021	344.713	322.738	343.907	317.632	52.5524	3020.25	3245.48	3121.68	3050.54	86.3822	8331.66	8399.93	8869.6	8776.24	114.719	8098.48	8174.45	17033.3	16606.1	176.499	42866.2	27009.2
9.67843	26486.7	14540.7	74120.6	32.0452	50453.4	30809.7	154961	2.69193	4229.18	3136.34	11352.4	3.3653	67.2793	65.9508	69.642	70.3439	8.90739	236.53	240.508	230.919	239.494	16.5674	240.122	241.108	234.462	245.43	22.0037	293.112	311.337	299.631	299.703	48.5007	2793.31	2999.77	3001.05	2901.89	75.747	7766.31	7469.31	7220.9	7735.5	118.331	8690.62	8589.34	16450.3	17810.1	177.215	43915.2	26416
9.77658	27713.2	14821.8	75988.9	16.3162	25338.1	15625.5	80935.6	2.59477	3985.87	3105.54	10555.6	2.56184	54.2614	52.5509	52.8472	55.0984	6.13787	167.22	169.663	165.717	170.941	14.9008	205.167	217.059	206.531	207.982	24.9534	357.593	342.713	332.952	354.366	46.594	2773.64	2723.07	2700.06	2736.55	79.8346	7527.89	8211.12	7546.34	8042.89	115.266	8450.32	8222.13	17009.2	17357.5	161.045	39874.1	23097.9
16.5179	48498.2	23181.5	119912	38.6537	63354	35121.9	186050	2.08026	3395.65	2469.66	8712.03	3.45698	72.7629	74.1863	72.1499	71.262	5.91856	152.476	155.55	160.852	154.473	19.0672	265.157	267.816	277.737	259.289	29.4984	396.612	425.669	400.668	414.566	38.4903	2389.07	2201.54	2207.86	2332.57	97.2149	9682.84	9772.3	9665.07	9966.98	123.202	8960.95	8447	18591.3	17824.7	168.723	43788.1	24662.6
16.2561	47564.5	23545.6	122928	30.9983	48145.8	30481.2	144982	2.68468	4222.82	3180.69	11378	2.58973	55.28	52.2497	54.8583	54.05	5.32796	144.505	141.251	146.618	145.103	16.1223	229.523	234.725	224.876	229.511	26.7183	371.035	354.102	379.432	365.835	53.4144	3041.05	3198.42	3075.28	3159.89	80.5511	7593.33	8073.96	7564.15	8327.94	112.165	8473.11	7698.58	15933.4	16442.4	175.785	44590.5	26368.8
11.7459	34379.1	16896.8	91541	34.19	54477.6	31720.7	162452	2.77031	4231.17	3134.15	11801.9	4.53705	93.2094	96.5396	93.9399	95.3756	7.05127	184.605	185.23	198.931	189.749	10.4408	144.922	147.721	142.904	153.963	20.6753	296.904	294.893	295.557	291.583	59.6124	3653.45	3463.89	3481.25	3602.34	82.7844	8402.42	8206.86	8032.84	7967.38	113.347	8199.38	7878.8	16454	16475.3	164.93	42059.3	24157.9
12.8472	34387.5	19182	100206	24.7198	37726.1	23735.8	126772	2.72746	4513.57	3118.57	11882.7	4.69573	98.475	94.798	98.7089	95.9993	8.51415	220.9	237.375	233.555	223.444	18.1813	260.586	247.172	252.98	258.421	24.7873	328.807	346.05	346.404	353.947	59.887	3534.97	3667.67	3636.46	3548.46	66.2653	6531.86	6233.51	6705.16	6472.2	146.826	11116.6	9825.33	20934.9	21461	198.665	47930.3	30172.5
17.0231	47489.3	26115.4	133466	9.36694	15189.2	9251.76	44290.3	2.77116	4274.73	3352.67	12001.3	2.50277	52.6437	50.5305	53.3622	49.4954	7.06208	183.393	181.036	187.789	189.872	13.2153	178.392	192.093	184.477	193.591	28.7169	390.135	403.469	385.072	376.552	57.6663	3599.74	3280.08	3479.02	3352.03	99.6227	9717.73	9980.12	9373.63	10001.8	125.254	8740.39	9030.22	18290.2	17668.1	172.382	44340.7	24916.2
8.82651	24120.6	13467.5	68823.4	16.5657	25705.5	16340.8	79301.9	2.59485	4007	3066.75	10738.8	3.62991	73.8395	77.8481	75.1848	77.4282	7.7382	204.681	210.564	202.434	204.528	19.317	267.263	261.732	271.964	277.942	26.8689	377.421	358.809	359.975	375.569	44.9948	2563.95	2773.46	2699.88	2630.12	60.7198	6159.21	5754.64	5981.92	5976.77	118.248	8875.21	7891.34	17206.7	16656.9	179.536	44221.1	26471.2
11.3147	31547.6	16588	87213.1	24.5323	39617.8	22155.6	115553	2.84169	4439.33	3453.34	12522.2	3.55131	76.1172	76.1053	75.4171	74.7156	8.06018	219.019	219.211	227.207	219.093	12.078	173.988	176.094	168.186	177.078	25.8114	358.226	340.89	368.554	352.537	40.8713	2397.07	2451.09	2471.24	2360.92	94.7161	9051.68	9684.6	9126.62	9261.85	105.641	7470.85	7618.55	15156.3	16211.6	193.508	49007.7	27678.9
15.4811	45058.8	23099.5	116116	28.2537	45755	25903.4	134758	2.91307	4709.73	3467.39	12142.5	1.68905	33.2983	36.0669	35.3832	34.1235	8.28967	217.722	227.814	224.076	217.517	10.6146	152.158	147.134	154.712	152.822	29.5655	422.61	403.602	418.182	390.533	38.1975	2238.92	2200.31	2206.31	2291.77	96.4108	9291.76	9743.43	9721.91	9290.54	132.548	9453.14	9724.36	20083.9	19217.2	198.648	50622.8	30364.4
12.1898	33359.2	18363.3	92603.8	26.8484	42478.1	25260.4	127263	2.2548	3573.55	2725.85	9486.49	2.40601	50.7109	50.7372	48.5733	48.736	9.88585	261.089	279.086	275.193	275.367	15.4623	225.126	224.852	222.365	222.16	27.7103	390.026	393.196	384.776	396.388	44.6651	2612.02	2689.58	2538.57	2727.78	70.66	6943.68	7086.52	6963.24	6954.01	110.314	8073.05	7490.94	16475.1	15442	151.983	38213.5	23184.9
8.82923	24966.2	12537.8	64638.7	38.0283	57957.7	36095.9	191527	2.9094	4739.01	3382.53	12809.5	1.37863	28.5004	27.8827	27.4525	27.2634	9.87765	277.012	263.912	275.877	256.346	17.4833	258.682	253.38	257.544	250.28	26.4684	362.834	380.984	382.081	375.203	38.7397	2382.02	2271.81	2217.95	2338.14	67.2942	6437.82	6756.57	6494.93	6662.12	105.076	7911.42	7284.54	15900.1	15151.5	173.825	43943.4	25492
17.0031	45973.1	25310.7	131311	32.3261	49826.3	30331.7	165609	2.54804	4154.15	2921.07	10908.1	1.63936	35.1478	33.5799	34.7512	33.0726	8.17751	220.258	212.317	227.682	227.921	13.8196	188.252	191.378	190.944	198.986	25.1934	350.899	355.556	332.206	345.097	39.9743	2341.1	2432.56	2484.43	2401.6	90.6966	9039.56	8554.67	9074.34	9150.06	140.6	10172.9	9848.94	20325.5	21212.4	156.175	37700.1	22954.6
9.00472	26037.7	13613.1	64976.7	28.9614	47634.3	27242.6	144720	2.48482	4065.37	3059.82	10569.9	4.03764	82.7589	79.8305	78.9589	78.8544	8.67498	229.983	243.684	236.392	224.682	13.2961	182.476	179.491	190.632	190.283	28.9725	404.903	413.538	396.16	409.19	59.9317	3601.21	3539.05	3460.37	3632.75	99.3597	9947.37	10056.2	9418.25	9926.74	112.067	7890.97	8016.46	16469.3	17109.9	193.161	46558.4	27272.8
17.4165	49562.6	25894	130900	19.5851	32570	17757.7	94628.8	2.79616	4617.56	3198.66	11778.7	3.99331	84.3557	80.8851	84.2792	81.8086	8.86378	250.02	241.208	237.968	241.394	18.5377	273.841	252.376	273.049	251.09	26.5725	373.724	353.067	371.045	378.905	43.6988	2594.89	2512.26	2740.33	2686.4	99.6713	10068.7	9812.39	10081.6	9402.67	121.302	9229.23	8872.36	18205.9	16857.1	152.359	38948.7	21223.8
9.77663	26712	13924	74452.1	16.3678	25590	15536.6	82497.2	2.57779	3930.23	3009.03	10399.5	1.23312	26.0891	24.2817	25.2461	24.5834	9.16823	245.272	252.258	239.811	254.95	11.9188	161.875	170.941	165.702	161.492	20.0959	281.296	271.306	268.051	281.23	44.7335	2683.94	2541.51	2746.02	2770.49	67.977	6682.98	6405.35	6741.09	6576.79	132.913	9625.54	9566.55	19534.6	19696.9	197.6	50457.7	29547.7
12.5009	34939.6	17686	97230.5	34.4831	53273.4	31192	165346	2.81323	4267.39	3169.49	12098.5	1.54239	30.5549	30.6825	31.3501	32.2596	9.14248	242.71	248.294	238.196	257.567	15.1359	206.094	213.988	212.235	216.599	22.1662	299.948	303.539	301.396	308.452	42.7623	2520.59	2628.73	2628.04	2508.93	82.6608	7766.34	7900.74	8233.9	8110.16	145.241	10392.6	9968.89	22085.2	22064.1	186.625	45608.6	27883.9
18.1755	49448.5	27970.2	133329	28.0035	46893.8	25710.3	140271	2.24186	3703.68	2760.27	9519.15	1.70565	34.688	33.6649	34.043	36.3664	9.99667	277.098	259.218	281.98	257.913	14.5929	204.517	211.835	205.417	211.999	27.8241	402.392	372.963	389.975	380.418	45.1789	2819.46	2698.61	2776.41	2705.64	69.7023	7104.44	6758.14	6989.58	6961.51	136.958	10087.9	9673.11	19885	19290.6	187.33	44397.7	28661.2
6.70499	19676	10135.6	48377.7	14.6463	22557.1	13567.1	72950.2	2.88069	4481.41	3352.45	12743.5	2.23287	45.5285	44.434	44.9991	43.6833	9.27813	248.475	244.412	262.013	252.116	18.156	263.176	267.062	266.579	253.268	26.1918	375.957	375.95	375.673	356.442	57.7873	3564.68	3460.85	3298.4	3529.05	63.0051	6144.92	5922.59	6351.15	6187.35	111.803	7901.59	8195.51	16725.4	16342.1	166.286	43086.2	24044.7
10.4478	28787	15213.8	82338.8	18.6891	29247.7	16986	89914.6	2.82378	4409.84	3228.54	11897.8	1.05153	21.826	21.4208	22.3375	21.2271	5.99033	163.413	164.652	158.977	164.458	19.4281	282.497	267.648	277.001	274.277	27.507	377.474	394.406	381.362	368.571	47.5628	2710.84	2771.56	2923.8	2766.82	83.1785	8458.88	8430.06	8084.06	8377.51	126.185	9515.63	8936.32	19116.1	18524.9	197.863	48202.5	28667.3
9.20405	24759.5	13839.2	66270.1	39.5881	60855.2	38865.6	187232	2.93815	4863.94	3376.27	12448.2	4.00564	79.7694	84.4093	85.4832	86.1214	9.61055	260.336	252.637	252.303	266.01	11.5079	168.497	156.113	161.968	164.496	26.9255	368.355	381.807	386.865	388.248	50.4587	3155.3	2997.57	2915.74	3041.1	93.3021	8780.97	9022.5	9061.19	9133.17	113.623	8063.97	8127.71	16933	16043	171.308	42825	25190.7
12.275	34851.8	18142.4	94784.8	27.2702	45736.9	25708.9	139405	2.66073	4102.37	3192.28	11242.8	3.96418	79.4133	82.5314	84.6884	77.6372	5.21595	139.927	142.845	146.677	144.772	14.4342	203.053	203.387	196.76	213.7	26.9543	389.787	368.177	365.442	377.369	53.2149	3204.21	3149.95	3204.24	3049.58	84.764	8299.47	8501.93	8174.04	8458.78	101.183	7535.27	6942.35	15532.1	14340.6	183.243	46879.5	28102.6
10.1687	29573.5	15667.3	79396.6	17.257	28288.3	15515.2	87686.8	2.29686	3558.76	2824.59	9936.33	1.51055	30.4612	29.4345	30.3341	29.9339	5.93901	163.364	165.954	164.493	156.609	16.0528	217.77	228.27	216.831	226.72	21.196	291.847	283.811	306.284	289.622	33.23	2051.08	2015.29	1913.93	2069.81	68.1006	6924.39	6408.33	6574.3	6750.18	131.5	9310.31	9021.01	18403	19939.9	183.001	45276.2	26300.7
15.6734	45866.3	22411.5	114967	21.9668	33499.9	21506.5	104432	2.78096	4555.88	3160.3	11864.3	2.689	55.4737	55.8337	54.3284	56.157	6.89814	191.737	189.425	193.948	186.966	11.9284	177.072	173.89	171.035	163.203	21.7337	286.377	312.945	285.303	314.217	38.3304	2227.28	2402.57	2253.4	2383.58	92.1235	8874.68	9061.98	9310.97	9230.3	121.571	9095.37	8279.72	17923.2	17877.1	177.3	44491.2	27008.5
7.10236	20021.6	10230.3	53841.3	39.4737	64568.1	37826.8	200948	2.42911	3908.76	2982.82	9982.15	3.36127	68.8414	67.8762	71.3781	70.6041	6.2565	170.034	170.947	168.965	171.885	18.1555	250.023	258.853	258.268	245.163	29.5309	386.582	405.397	423.483	418.672	50.8481	3042.17	3133.46	3007.39	3122.9	61.447	6088.07	6241.95	6367.78	6122.68	144.004	10564.1	10232.7	22000.1	21600.2	155.393	39273.9	23306.8
9.1284	25096.6	13090.9	70467	14.523	22905.6	13146.1	71549.3	2.9884	4674.63	3486.16	12133.1	3.47594	71.6649	73.6991	73.9459	69.8628	5.40615	140.999	141.086	143.502	149.3	19.7477	268.235	280.937	280.724	269.821	26.8719	367.663	381.16	383.822	358.043	50.1268	2870.72	3087.56	3058.26	3021.22	73.2315	7072.28	7049.07	7424.51	7281.35	125.673	9294.12	8959.55	18089.5	17691	194.844	46560	28496.3
5.54202	16116.2	7824.95	42750.3	31.2905	48917.3	29909.4	147943	2.58254	4202.12	3000.06	11052.1	2.26189	44.0701	46.6155	45.914	44.3423	7.88966	217.86	212.679	220.547	211.326	16.2034	229.408	223.893	227.903	221.36	24.3299	319.374	321.503	330.975	320.597	48.4914	2932.27	2981.91	2843.32	2929.75	95.3477	9389.53	9403.16	9238.1	9400.08	141.03	10380.1	10286.4	21168.5	21396.1	199.93	50105.8	29255.1
11.6507	32639.1	16773.1	88311	34.324	57087	33302.1	172974	2.08952	3441.08	2470.56	9082.11	3.89484	83.2573	81.537	78.8127	81.5168	7.37051	208.057	195.091	206.772	206.496	12.4788	181.276	182.366	185.17	170.655	29.5026	390.147	398.272	400.489	387.179	43.9973	2566.36	2642.97	2526.98	2565.4	62.5238	5965.36	6151.23	5907.65	6330.52	129.004	9519.87	9064.31	19464.2	18952.8	155.714	38522.8	23871.6
13.4587	38457.4	18846.3	105649	25.7318	39934.8	24155.8	128522	2.61315	4016.68	3083.61	11000.6	4.11442	83.9958	83.035	82.563	86.6007	5.54092	141.814	143.664	154.604	151.098	16.9036	235.696	231.735	246.88	243.088	26.1467	377.992	348.872	364.748	358.268	47.7012	2916.88	2841	2782.08	2809.81	79.2351	7482.15	7877.68	7857.66	8006.68	138.137	10033.8	9204.89	20061.2	20097.4	159.236	40648.1	23207.6
18.0965	49360.8	25850.2	139586	35.5102	55945.8	32191.3	182694	2.43123	3799.34	2776.05	10556.9	4.91362	96.6253	98.3601	102.256	103.461	7.87878	205.035	214.227	204.061	208.518	17.9177	263.435	259.409	255.573	256.519	24.5006	322.354	347.127	338.445	332.406	42.7573	2654.2	2494.67	2488.04	2471.63	95.9458	9908.51	9609.31	9588.17	9301.17	126.448	9503.31	9016.1	18336.7	18167.6	174.957	41237.3	26623.8
7.34182	20662.8	10438.7	57617.2	29.545	46746.9	28290.4	144097	2.43833	3929.6	2818.21	10665.1	4.91233	97.3343	95.8581	104.385	96.6558	9.51643	263.487	245.943	268.461	246.234	12.927	180.599	174.112	180.948	182.299	27.3383	388.442	394.38	366.624	372.299	30.6654	1869.27	1889.49	1788.13	1913.52	81.5331	8387.46	7722.35	7847.44	8275.62	122.022	8862.09	8378.26	17087.3	18507.1	172.111	44815.5	26284.5
15.794	45289.1	22194.5	124691	13.1322	20701.2	12949.4	65582.8	2.98218	4587.79	3535.64	12259.6	4.03222	82.6698	82.0701	83.7379	81.2102	6.54695	172.356	179.991	174.784	178.333	15.5035	220.714	219.772	219.89	215.39	25.3445	354.13	355.735	352.304	344.458	34.1425	2062.6	2045.92	1954.37	2031.11	94.6337	9736.12	9521.22	9435.63	8967.36	113.069	8582.58	8014.26	16786.3	15923.3	176.693	43952.9	25331.9
5.10778	14250.8	7631.8	38630.5	32.091	48893.5	28778.9	164530	2.4562	3984.53	2795.2	9862.59	1.95507	40.1029	41.5102	41.4902	40.699	8.1724	212.871	217.373	227.127	213.782	15.0217	213.26	204.993	203.889	203.354	27.4347	364.086	361.59	369.673	396.13	30.6505	1809.58	1881.37	1872.17	1893.87	92.1689	9269.88	9409.88	8914.37	8679.95	111.122	7990.27	7548.81	16979.2	17003.6	161.152	39992.4	23234.3
15.1776	42669.3	21872.6	112734	29.6233	46360.7	27517.1	149929	2.39903	3948.97	2941.78	9784.13	1.43028	30.3214	27.8472	30.2709	29.0888	5.89604	165.413	160.212	163.138	157.011	14.4588	195.518	213.586	212.71	204.042	29.0768	400.02	402.722	420.046	395.047	45.288	2685.69	2636.18	2725.66	2686.78	99.8582	10052.4	9816.41	9988.24	10317.9	141.184	9969.36	10115.4	21037.5	19875.1	186.729	45092.8	27064.5
13.6253	37055.6	20592.1	99034.4	25.823	43337.4	25010.2	124339	2.9711	4590.61	3485.8	11985.6	4.03815	81.4005	84.0425	82.1635	86.8009	8.26055	232.528	211.307	230.492	228.173	13.865	195.369	202.274	198.125	199.55	22.2665	297.91	297.816	305.45	299.6	58.7262	3508.12	3680.67	3635.75	3630.85	62.6787	5972.99	6118.45	6158.01	6472.8	114.35	8462.48	8180.19	16526.6	16331.5	188.894	45331.2	27451.7
15.7679	45112.9	23613	121888	14.2219	22163.1	13994.5	66964.4	2.71768	4451.26	3167.91	11083.2	4.58818	92.9682	91.032	90.4311	93.5229	5.13024	141.486	131.371	141.647	133.822	11.7576	164.748	170.512	161.223	160.212	27.2565	392.519	358.588	378.072	363.777	51.2953	2989.15	3133.91	3048.05	3173.77	71.9716	7410.42	6813.68	7279.88	7384.02	101.699	7534.48	7289	15441.3	15010.3	177.412	42939.6	26061.6
19.3212	55034.7	27681.9	146112	32.1081	51518.5	28775.8	157098	2.61141	3997.7	3111.57	10868.5	2.58842	51.0461	54.1723	53.7114	55.1029	7.00062	196.211	182.53	180.3	184.154	16.3367	240.415	224.275	229.726	225.199	24.9603	332.621	357.062	360.866	352.829	32.5292	1854.4	2023.1	1960.13	1897.36	86.1399	8784.75	8377.52	8556.41	8409.07	109.409	7682.48	7410.96	16226.9	15865.9	152.901	36403	22570
5.58153	15604.2	8113.93	42414.3	27.993	45054.4	27643.8	130716	2.18302	3347.22	2599.4	9639.63	1.33954	28.4452	26.8026	26.1308	28.0267	6.36183	177.478	179.294	164.558	170.596	15.3994	212.59	215.717	208.39	208.166	28.1355	386.651	386.113	385.315	392.555	55.0695	3258.71	3303.08	3180.19	3181.62	98.8014	9931.52	9333.09	9667.17	9656.82	128.37	9643.41	8969.21	19211	18847.6	154.655	39643.5	21558.5
12.583	34696.3	18525.4	97496.8	14.9048	23089.7	13678.1	75250.2	2.54953	4123.07	3131.09	10319.7	3.11542	65.1588	61.891	65.1577	66.0103	6.23212	176.077	160.279	170.573	163.579	17.7221	248.39	256.773	262.186	249.07	24.8057	337.526	324.801	351.355	352.25	39.2897	2271.22	2404.42	2374.88	2292.56	79.9901	7894.79	8272.41	7835.77	8233.41	127.022	8847.25	8899.23	19233.3	18375.4	180.113	44599	26068.8
18.4758	51105.4	26711.2	132507	18.1253	28631.7	17510.4	91549.4	2.97272	4675.19	3499.42	12291.8	2.92273	60.9432	58.6318	57.3556	61.3324	9.37648	254.133	247.239	250.051	246.516	19.0644	282.23	280.266	269.934	265.775	20.898	278.152	291.262	297.257	281.689	59.0826	3582.66	3526.06	3460.46	3555.3	82.1412	8151.3	8387.3	8472.84	7865.53	140.568	10111.9	10239.7	20145	21456.1	186.807	47993.2	26373
10.7983	30443.7	16287.8	78879.4	23.1756	37451	21227.5	113864	2.9782	4894.75	3633.29	12198.4	1.89505	36.8979	40.6688	40.3926	38.9316	9.23199	236.1	245.957	242.912	241.058	14.8335	214.608	209.194	206.253	208.492	25.5685	351.373	366.34	337.923	356.727	42.2016	2469.15	2545.79	2521.12	2452.74	90.6221	8511.27	9133.5	9064.69	9056.88	137.955	10278.2	9536.03	19188.2	19715.6	159.669	40770	22781.4
7.82882	21221.3	11328	60376.2	25.9776	39530.2	23270.6	126435	2.00629	3262.68	2374.91	8853.87	1.91151	38.4418	40.407	37.5205	40.3948	8.10827	211.842	222.154	226.403	209.875	11.2588	166.65	153.311	153.118	165.72	26.0576	352.302	369.897	363.726	371.412	30.3039	1835.45	1817.12	1794.62	1860.66	74.5713	7336.5	7637.21	7545.44	7214.44	123.43	9326.57	8765.83	17234.6	17588.5	182.056	44869.5	25734.9
6.59254	18217.6	9760.75	50944.3	34.7201	54111.3	32389.3	170979	2.53688	3830.31	2958.13	10358.1	2.31719	45.1731	48.4389	48.4669	48.8751	5.06784	137.893	137.592	142.82	140.166	17.5101	246.058	239.82	253.266	237.04	21.9617	290.417	295.631	293.208	307.052	32.5576	1986.88	1860.76	1864.58	1914.7	98.2767	9863.51	9708.42	9961.41	9443.19	100.967	7617.24	6924.76	14085.2	14313.3	195.869	46570.7	29430.4
14.6972	39927.1	20524.1	109926	36.2807	60545.7	32790.3	182511	2.85505	4395.57	3208.46	12411.8	4.64796	92.5292	93.8326	91.2479	99.244	5.73713	152.31	146.668	162.007	146.669	19.0599	261.172	261.176	273.002	277.982	20.8138	279.766	285.449	295.699	293.165	57.0117	3550.06	3577.97	3517.48	3416.56	69.8731	7100.18	7019.15	7070.44	6645.22	139.006	10087.9	9417.67	19604.9	20864.2	160.877	40251.3	23582.7
11.2628	31379.3	16817.7	87393.1	16.425	27160.9	15928.3	78059.6	2.55231	4203.41	3005.84	11066.6	2.73946	57.0024	56.8745	54.5091	53.8858	8.53372	236.033	227.545	230.966	221.612	12.4552	183.947	182.822	178.02	172.454	26.8761	374.638	363.57	379.729	352.29	55.1472	3135.2	3323.84	3271.67	3359.65	72.36	7231.6	7003.06	6894.93	7040.64	141.827	10079.4	10368.8	20114.3	21586.8	177.227	42938.8	25525.1
19.6285	53705.6	27857.6	141506	36.5803	56928.1	35585.2	173492	2.749	4562.54	3312.69	11538.2	3.48841	71.6469	70.1408	70.173	68.9582	9.41795	255.966	252.296	254.093	263.146	13.3873	184.408	197.017	190.902	181.082	20.8819	274.675	283.9	294.258	284.561	52.7819	3036.56	3136.64	3297.99	3105.81	74.0456	7139.4	7515.73	7670.95	6983.73	134.935	10272.1	9086.09	19144.1	20565.9	151.863	38249.8	21916
10.7208	30088	14969.6	84667.1	37.2222	59522.2	36391.8	180384	2.35911	3838.7	2825.15	9851.25	1.68467	33.4614	35.8115	34.8463	33.2362	5.46338	143.291	150.278	144.26	144.615	19.4461	272.635	268.005	281.515	278.302	24.6277	329.112	337.362	322.678	341.413	45.2057	2593.57	2717.93	2797.4	2786.61	86.1646	8407.7	8712.89	8641.1	8896.31	139.806	10618.2	9659.57	20075.8	21213.4	166.294	42937	24092
9.0051	26027.7	13712.7	69647.7	15.2753	24665.7	14237.4	72269.8	2.89636	4700.74	3238.41	12762.1	2.80226	55.7454	58.419	55.1799	55.409	6.02847	165.598	154.653	159.036	164.215	11.2671	153.33	158.05	167.278	151.665	26.4138	377.912	377.768	363.99	369.76	36.3058	2149	2247.28	2104.47	2249.95	61.1285	6336.46	6047.4	5766.63	6226.1	121.334	8477.88	8272.01	18092.9	18322.2	179.53	43199.3	26070
13.8307	40387.5	19743	104211	10.3847	16014.7	10073.2	50073.2	2.98501	4605.44	3345.53	12987.3	2.37918	47.1891	46.5898	47.1057	47.6621	6.87729	186.645	181.678	179.302	182.942	13.2745	194.237	188.043	188.289	187.951	20.697	286.784	276.649	281.162	272.22	37.7847	2344.2	2336.61	2154.32	2370.84	98.0433	9813.68	9298.1	9529.67	10034.7	118.241	8667.56	7948.62	16463.6	17038.7	173.463	45082.2	25702
17.3989	49588.8	26348.9	129814	25.5452	42603	23511.4	128916	2.46977	4101.85	2864.91	9937.63	1.87215	39.2384	36.7727	37.0695	37.0369	7.19498	201.767	191.915	193.549	199.167	16.5693	245.058	225.323	244.341	239.85	21.5973	299.771	287.943	295.4	309.891	44.2386	2703.93	2586.32	2708.44	2690.85	62.3796	6069.12	6219.29	6461.44	6102.73	117.267	8305.37	8421.73	16362.6	17518.2	174.946	42986.4	25376.2
5.63124	15277.7	8191.71	43298.3	15.7295	24105.4	14633.9	75173.2	2.33598	3591.19	2713.71	10320.3	4.18666	88.4779	83.9596	81.8345	89.1364	7.9648	209.268	218.631	206.255	221.191	11.4334	166.285	168.236	160.922	167.418	29.3808	386.719	411.72	407.811	402.706	46.0765	2816.22	2736.14	2777.56	2648.33	93.9921	9553.84	9492.26	8850.79	9119.13	121.235	9043.1	8299.53	17504.5	18052.3	172.801	44976.3	24195.1
7.25282	19640.9	10819.8	53822.3	9.80184	15051	9681.48	50039.6	2.72519	4414.36	3312.81	11201.3	1.41651	30.1817	28.0255	30.3365	28.3251	7.75548	208.212	208.695	200.773	200.096	11.692	168.939	159.491	157.086	169.947	22.3249	298.322	306.759	320.512	303.088	52.7501	3140.73	3059.34	3152.28	3144.37	91.0387	9080.07	8638.15	8751.31	8831.15	149.548	11405.9	10473.2	22960.7	21267.6	182.437	46644.9	27872.7
15.7396	45838.6	24094.2	121711	37.7204	62724.6	35203.6	189524	2.12696	3370.5	2588.36	8695.5	4.95082	101.843	100.07	99.4544	103.258	5.93167	164.497	159.613	156.249	155.859	10.9977	155.92	152.376	160.385	163.182	27.2643	376.474	388.016	384.616	372.571	38.5749	2355.98	2223.55	2291.99	2287.24	75.9671	7514.76	7327	7425.76	7537.58	130.677	9739.69	8858.22	19978.1	18915.7	187.585	45447.2	28386.4
7.82038	21368.3	11943.3	57261.1	19.1927	29274.5	18171	98693.9	2.83102	4541.57	3412.53	12492.7	3.25877	64.8396	67.9706	69.3098	68.7816	7.28417	197.67	199.634	200.08	189.806	18.1593	246.444	245.695	251.541	267.459	21.658	309.941	297.728	311.131	294.436	46.9309	2909.71	2678.2	2687.56	2828.66	63.6105	6160.66	6199.9	5982.28	6450.84	137.673	9982.41	9956.92	20138.7	19924.5	185.476	46059.9	26551.1
16.813	47288.1	23661.5	131447	28.6439	46692.4	25653.6	142481	2.46797	3996.29	2929.27	10248.7	4.79882	97.1141	95.6377	95.8854	93.4028	9.95472	270.617	260.206	272.41	255.348	14.3539	212.852	201.181	210.931	199.402	21.5695	309.971	288.196	309.635	310.773	31.0726	1857.96	1773.83	1794.45	1870.98	90.8329	8857.23	9268.32	9362.48	8582.14	110.317	8395.94	7629.23	16125.2	16809.6	184.371	47714.9	27169.5
13.9472	40779.1	19906.4	105343	35.259	59186.6	31984.6	169110	2.88065	4772.38	3295.54	11619.5	2.61813	51.9672	54.5463	53.8909	52.0671	9.26053	245.718	240.944	237.993	243.845	10.9614	155.151	153.556	157.789	158.124	28.0617	374.21	395.937	375.31	386.527	39.2186	2346.59	2247.51	2429.9	2268.53	75.0152	7142.75	7293.81	7469.77	7228.03	119.048	8562.15	8354.39	16944.6	17916.7	161.044	41798.3	22538.1
15.4453	41595.1	23673.3	116158	21.2562	34571.9	20610.8	106346	2.2322	3503.37	2668.51	9297.37	1.42653	28.2523	29.1286	28.8985	29.8557	9.1507	234.179	247.14	239.347	244.249	14.6507	199.855	198.456	201.775	199.348	27.3626	381.045	395.199	386.307	383.109	33.9294	2067.97	1994.75	2003.64	1990.69	88.6009	8991.7	8600.75	8645.35	8380.33	101.777	7173.83	7216.43	15596.6	14143	174.869	42807.7	25092.2
19.4176	52404.2	28830.5	149900	14.4149	23477.1	13203.7	67771.4	2.00355	3185.58	2296.61	8195.82	3.60021	75.433	74.5663	76.2611	75.4939	7.25523	200.822	186.015	194.325	194.989	12.8036	180.821	187.901	172.18	175.216	20.6449	287.653	274.836	270.619	284.371	34.5766	2121.25	2017.68	2033.78	2152.29	84.6945	8194.22	8047.61	8359.4	8015.63	148.668	10779.8	10748.5	22531.7	20901.5	161.438	39719.9	22914
5.79159	16238.3	8485.3	41854.5	22.3037	35709.1	20031.1	105166	2.0191	3334.69	2343.03	8830.39	4.85813	96.8613	101.687	100.296	102.793	7.26131	195.483	205.009	190.128	195.858	13.9184	189.359	201.216	201.604	206.146	21.066	299.358	283.136	278.912	300.431	46.3247	2670.41	2678.45	2746.09	2875.31	75.4167	7585	7143.38	7107.38	7770.92	112.029	7953.96	7736.86	17196.7	17094.6	167.657	43030.3	24187.9
8.21824	24119.2	11751.8	60931.6	34.7203	56613.7	34160.3	172077	2.31806	3596.79	2675.58	10227.7	4.40267	87.314	92.9579	90.2347	92.662	8.99277	251.75	249.721	252.642	248.274	16.0172	235.363	222.002	219.345	236.226	20.251	270.849	288.314	275.569	273.222	30.7519	1754.26	1780.5	1915.92	1906.56	85.463	8602.55	8692.6	8416.05	8852.25	120.07	8432.39	8768.32	17046.2	17361.9	187.497	46114.3	28747
8.94579	24940.5	12579.7	68370.1	23.3423	35896.1	21696.3	112598	2.64022	4238.84	2970.32	10689.2	4.66003	95.9857	95.3374	90.7263	96.9454	6.89463	194.545	190.324	187.698	177.948	14.5526	209.038	196.155	202.614	216.033	28.9141	409.726	395.18	402.263	408.439	56.1634	3427.77	3400.87	3426.06	3364.79	66.8596	6690.35	6899.85	6737.64	6707.25	147.732	11049.3	10527.3	21584.9	20826.1	199.3	51881.8	27787.7
16.5721	45068.3	24637.5	126607	35.8138	58877.3	32507.6	178995	2.75369	4573.11	3227.43	12105.9	2.30054	45.1598	45.0111	47.3636	48.3278	5.23103	147.709	142.11	142.126	139.805	17.2719	245.566	247.58	236.639	236.13	27.6376	397.474	369.898	365.518	383.249	30.6914	1828.37	1758.43	1925.46	1831.03	95.876	9750.38	9186.18	9397.61	9931.87	120.869	8936.93	8202.19	16910.9	17470.5	154.656	38232.3	22547.7
12.1643	33253.5	17728.9	95025.3	9.04245	14846	8187.26	43942.3	2.77039	4223.29	3347.65	12171.4	4.46457	91.404	94.0514	91.9852	92.387	6.03117	163.48	165.395	169.13	162.384	10.528	151.492	150.74	153.911	152.633	23.4396	332.153	326.649	317.94	316.931	45.3022	2597.84	2681.53	2588.24	2758.03	78.0787	8058.68	7577.26	7980.29	7465.17	112.849	7829.98	8039.98	17103.2	17164.1	192.917	47226.4	29486.9
15.6851	41857.3	22114.6	120009	39.1766	60129.1	37298.3	183846	2.06074	3164.92	2364.15	8610.35	4.96952	105.185	97.8351	106.744	98.1943	9.5716	268.351	260.633	270.004	268.62	11.1564	159.943	159.194	155.975	152.099	21.186	297.168	277.701	283.346	289.745	52.1676	3101.59	3221.64	3252.97	3176.75	78.9743	7465.53	8055.55	7431.57	7947.59	146.045	10754.1	10390.3	20434.8	21603.7	197.799	47214.4	27974.1
10.407	28654.4	14928	74513.6	35.1322	57624.6	34489.8	172310	2.20889	3378.34	2620.21	9182.32	1.69502	36.1496	35.0307	33.2293	34.1152	9.23336	236.793	245.208	253.532	255.459	14.3773	205.307	208.006	199.34	211.061	24.0939	333.703	342.979	317.027	345.563	40.459	2493.75	2519.4	2305.19	2519.76	74.2382	7212.41	7667.43	6968.61	7684.08	143.482	10642.1	9965.56	20602.7	20611.8	178.685	45436.8	26168.8
16.8933	48921.8	25124.8	130766	15.7427	26365.8	14363.7	78715.3	2.32289	3831.93	2618.81	9388.75	4.01915	79.1228	78.6558	84.1957	78.9326	6.65281	171.738	173.041	174.97	186.062	18.3154	248.22	262.636	271.02	266.583	24.8639	357.63	342.572	358.791	355.857	41.8575	2507.6	2431.54	2539.11	2597.49	94.3522	9032.79	9601.66	8896.38	9500.19	106.958	7424.6	7683.15	16032.3	15309.6	199.751	51963.2	30616.1
16.321	45952.9	22915.9	128386	11.7023	18407.9	11082.8	56371.5	2.26193	3574	2639.93	9176.94	1.74493	36.9676	37.4912	35.2323	35.3297	8.16165	226.895	228.923	226.847	227.694	16.4231	223.672	224.959	230.075	239.163	23.1016	303.989	309.927	326.217	324.79	55.8373	3222.07	3349.15	3201.57	3365.95	68.5244	6957.98	6554.19	6753.97	7065.63	105.986	7528.77	7585.8	15701.9	15676.8	151.311	37965.6	21283.6
12.284	33362.1	17577.9	89569.6	31.2244	48186.9	29746.8	155823	2.07182	3261.28	2452.54	9120.4	3.18275	65.8585	67.5319	63.7054	67.9383	6.33405	170.32	174.149	172.149	177.884	14.5769	212.234	215.694	204.921	216.401	24.7168	328.71	334.748	353.11	323.699	44.2308	2737.98	2641.44	2732.87	2695.05	60.1499	6199.03	5649.79	6157.91	5831.55	139.967	10061.1	9753.97	20527.3	19610.1	177.357	43934.1	25988.8
7.44034	20739.5	10981.4	58148.7	16.4076	26903	15670.5	79702.5	2.44058	3978.27	2951.18	10446.5	3.32414	69.8758	66.0765	66.8924	70.3934	8.56529	239.025	230.327	219.487	237.948	17.9893	246.529	257.17	262.964	262.949	25.7284	338.408	366.797	341.472	368.466	48.0069	2960.47	2790.24	2896.11	2887.54	64.6233	6703.52	6524.59	6651.39	6346.32	102.903	7750.48	7332.39	15405.1	15457.5	159.832	39938	22856.8
19.8675	56345.7	28314.4	146673	23.2606	35488.7	22567	117391	2.80189	4584.92	3350.79	12410.6	4.65982	98.8617	92.652	92.816	96.3416	8.5685	220.653	240.784	242.053	241.579	12.3436	179.979	182.748	172.219	170.514	20.6176	269.893	274.931	283.543	287.876	54.9846	3319.87	3160.58	3377.26	3199.18	96.1516	9934.92	9561.57	9882.33	9662.36	110.918	8339.66	8093.39	16203.6	16674.9	179.624	44882.3	26520.2
5.99977	16573.6	8409.94	45918.9	29.7029	46352.2	28704.4	150475	2.93167	4684.91	3488.1	12781.1	3.64807	72.3291	74.7345	73.5996	71.0418	8.0339	215.041	215.399	221.292	213.57	13.0278	190.373	190.643	179.351	182.019	28.4989	387.664	376.05	396.898	404.019	59.7164	3464.78	3433.14	3618.76	3693.49	93.1325	9109.05	9000.67	8972.04	9185.61	147.327	10858.3	10582.9	21412.4	21074.4	175.905	43332.5	26801.1
10.4402	30506.6	14600.5	78607.3	12.0243	18739.5	11397.1	60563	2.0037	3300.03	2462.49	8822.58	2.47049	48.8156	51.0435	52.3704	51.081	7.54319	206.237	203.097	195.289	199.148	16.1441	239.345	223.069	230.63	238.301	28.5912	410.83	405.536	392.211	398.605	41.3685	2535.71	2506.68	2537.01	2501.74	98.6701	10173.3	9509.58	9440	9304.65	115.126	8798.83	8192.42	16518.7	17238.4	178.471	44873.5	25843.9
15.5039	42675.1	23722.6	122530	15.6179	25959	14989.4	73042.3	2.91645	4641.05	3403.61	12232.8	4.46746	90.3203	90.7999	94.3109	87.9339	6.17112	170.382	166.15	168.616	169.399	19.0328	270.078	279.897	281.443	268.612	29.9067	396.674	424.814	405.495	427.658	35.163	2129.83	2195.18	2052.68	2086.74	70.2962	6607.93	7261.8	7272.51	7195.88	137.773	10318.5	9245.97	20201.1	20470.6	163.097	40245.4	24604.5
15.5913	41644.2	23636.8	117928	29.852	48136.2	28323	145954	2.47168	4041.79	2898.75	10836	1.14212	23.6269	23.6323	22.4712	24.0262	7.06032	195.011	196.083	185.086	184.418	11.4253	169.486	166.26	169.069	155.209	29.0972	400.563	405.536	385.452	396.972	41.3745	2464.83	2438.43	2539.16	2455.29	82.4559	8258.64	8242.45	7859.44	8276.87	116.245	8650.29	7881	17122.6	17704.8	163.486	39348.2	23102.6
18.4776	51963	27007	140775	12.7053	20976.5	11463	60096.1	2.35069	3598.76	2891.58	10029.6	3.71777	76.267	79.8548	74.6607	77.4392	6.05903	167.05	160.6	166.932	164.511	13.69	196.254	189.001	198.028	186.811	28.2439	407.349	386.058	406.439	373.902	37.378	2139.16	2215.83	2232.46	2255.9	61.027	5895.64	5772.45	5839.21	6063.16	142.504	10563.9	9696.42	20744.8	19849.9	181.332	43300.3	27520
15.0411	43785.3	22629	113090	19.1981	29710.2	17589	95343.6	2.98048	4534.14	3450.76	12989.6	4.72369	97.6668	93.6965	92.1876	95.6687	6.83044	191.118	191.251	189.124	175.567	17.222	245.576	251.777	252.183	252.457	20.9576	285.727	281.684	298.205	281.551	41.3977	2478.88	2587.53	2366.49	2456.68	61.5779	6058.21	6355.13	5789.51	6387.43	125.56	8725.62	8526.58	18942.1	18798	191.358	48807	28306.6
14.4008	41320.4	20775.4	112729	36.3639	56581.5	32824.5	174227	2.92969	4680.54	3394.62	12357.8	2.52261	49.6777	53.5414	52.717	50.6103	9.32572	241.567	258.268	250.656	262.279	15.6102	227.739	224.902	223.565	229.182	26.2601	343.764	364.744	356.477	355.29	55.5761	3361.29	3483.23	3294.92	3188.74	96.7166	9578.46	9489.8	9290.92	9609.73	136.806	10306.6	9864.86	20490.2	19841.9	182.313	46840.4	25449.9
9.36885	27432.6	14139	72299.6	14.4631	22600.5	14123.3	68828.1	2.85581	4464.32	3194.04	12528.5	1.90774	40.0537	39.1459	40.9316	39.543	7.65939	198.418	215.035	214.848	203.781	12.7951	188.28	172.777	173.165	183.483	20.4554	287.934	274.963	280.543	284.862	44.7593	2694.83	2804.55	2576.36	2784.76	86.0308	8601.2	8834.59	8693.37	8847.5	127.378	9569.06	8591.76	19363.4	19074	185.463	45400.1	26758.6
13.6195	36512.1	20785.8	98672.8	13.4343	22544.3	12431.8	63650.6	2.95662	4496.71	3510.24	12443.8	2.71322	57.5717	56.0766	54.3825	55.8147	5.43314	144.486	153.217	152.232	142.122	10.0399	145.285	148.916	143.354	137.597	21.4507	302.873	300.168	289.755	305.075	40.9081	2465.23	2359.55	2490.52	2422.98	85.0765	8062.45	8543.46	8763.89	8350.66	108.637	7583.14	7392.1	15441.2	15636.2	169.058	40506.3	24064.3
11.0507	31767.2	15938	80173.5	13.362	20744.3	12144.7	63606.5	2.38746	3849.75	2677.41	9860.28	3.93894	76.8066	81.6628	81.4317	80.8036	9.94677	268.108	254.548	258.845	265.765	17.8599	257.798	253.249	260.957	242.897	23.9755	314.527	345.57	331.655	330.269	47.2427	2868.83	2854.51	2899.38	2818.87	92.9707	8959.9	9128.14	9212.45	8805.68	143.131	10892.1	9926.41	20094.1	21452	165.446	40581.9	25092.9
17.4314	49977.8	24323.8	130272	13.806	23137.1	13401	69543.5	2.34606	3842.31	2646.05	10249.8	2.75127	53.7631	53.8817	54.4731	56.4132	9.45115	256.749	264.011	255.636	263.916	18.9171	272.547	261.419	278.677	260.501	22.2067	305.67	308.031	298.047	297.362	55.9918	3486.32	3203.67	3365.95	3418.86	66.4922	6527.69	6726.56	6661.87	6653.35	104.753	7665.96	7615.86	15165.2	15290.5	159.275	38843.5	23082.5
7.16371	19299.2	10435.4	54005.5	21.7099	34131.2	19731.9	103426	2.31218	3722.5	2617.24	9509.98	3.64357	71.469	74.9597	74.5275	73.3038	5.20852	144.182	142.305	136.963	134.577	15.7606	229.156	229.112	218.289	226.873	23.0001	308.954	331.982	329.018	318.485	35.6276	2182	2065.92	2212.79	2203.27	70.0737	7096.56	7219.91	6590.14	6582.11	117.165	8496.43	8020.16	17957.3	17712.9	177.813	44759.7	26371
12.6206	34598.2	19190	91707.6	10.3426	16868.2	9293.61	51679.2	2.915	4482.83	3519.26	12338	4.89999	100.016	98.3435	102.243	103.488	6.18143	169.579	158.895	159.626	173.571	13.2435	178.294	182.414	190.849	190.136	24.7783	344.505	334.064	344.359	325.222	49.3972	2840.06	2968.48	2884.91	3093.84	61.4015	6341.76	5995.19	6001.97	5856.77	102.072	7183.94	7046.14	15087.3	14569	157.829	39531.1	22784.7
5.3379	14939.9	8054.62	38840.6	33.6701	54250.8	31240.3	165740	2.91889	4498.9	3301.5	12195.7	3.76044	77.0448	73.2676	75.0272	79.6481	5.52715	142.826	152.633	146.106	148.968	11.303	163.333	161.073	159.897	158.104	27.1624	372.675	373.068	386.037	374.877	44.4336	2604.94	2787.99	2786.91	2758.79	82.0701	7877.95	8373.09	8015.47	8291.03	130.524	9371.05	9490.69	18615.1	19186.2	199.643	49785.2	27832.6
18.7061	50970.8	28025.6	140376	12.9928	20273.3	11882.3	66796.4	2.89873	4399.86	3391.22	12748	4.86585	97.8818	104.457	102.672	97.3643	8.98717	241.055	249.447	250.274	235.307	15.3279	206.682	210.265	222.317	217.444	23.8463	338.69	318.86	344.93	321.626	46.5606	2782.4	2916.22	2874.9	2795.65	86.3914	8812.7	8235.55	8774.52	8349.65	106.329	8092.98	7747.37	16258.1	14871.8	171.631	42657.1	25355.5
14.5926	39643.6	20613.7	111927	22.4611	34424	20648.3	107568	2.55889	4168.76	2971.58	10296.8	4.83462	98.2954	99.6963	95.762	100.792	5.58061	148.08	146.671	151.154	148.166	18.8466	255.547	262.677	270.052	268.553	28.7708	400.31	400.244	386.434	404.37	41.4501	2394.35	2556.06	2451.05	2394.37	62.2999	6101.51	5969.1	6273.95	6415.29	102.75	7344.31	6964.25	15424.3	15384.1	164.623	42000.1	23703
6.92304	20147.1	10616.4	50832.3	35.5384	59265.7	32583.4	183125	2.94998	4539.63	3395.71	11958.8	2.98048	61.1784	62.6406	58.5972	60.9338	8.23438	221.561	221.144	214.452	218.184	19.2448	267.373	267.208	272.756	279.022	20.8298	296.981	281.243	295.812	279.514	43.4815	2497.43	2684.38	2642.2	2605.32	86.1609	8750.26	8485.13	8861.92	8125.91	122.381	8785.87	8599.04	17513.1	18416.8	199.582	47324.6	28055.7
12.0108	35264.3	17847	87288.9	17.2517	26782	15759.7	81731.8	2.90825	4587.13	3496.36	11851.6	2.66965	53.222	53.2057	53.7975	53.4895	8.97847	240.952	242.819	252.146	246.361	10.1976	146.64	151.16	137.186	148.678	23.6482	332.589	322.841	317.937	327.45	58.9074	3625.03	3669.75	3651.95	3578.84	71.5051	7096.75	6832.54	6739.9	7368.16	134.477	9827.96	8992.78	19321.8	20642.2	195.514	46575.9	28778.1
14.1028	38967.4	21396	110778	28.5777	46591.2	25573	145884	2.30687	3791.8	2690.96	10214.5	4.87127	103.365	101.032	102.271	99.1597	6.65368	177.082	178.783	176.44	186.439	18.0736	267.445	247.155	243.754	246.195	23.144	306.737	319.894	307.94	312.224	49.4908	3057.63	3067.13	2873.88	2859.79	84.6141	8427.1	8078.37	8025.77	8312.08	109.023	8280.31	7961.35	16418.3	16107.7	169.488	40839	25240.8
18.0237	52268.5	26648.8	139896	29.0947	48167.1	28630.8	147310	2.27806	3646.15	2572.49	9299.98	1.78226	35.3133	36.2595	36.9453	36.2195	7.06538	197.327	182.735	185.402	190.734	17.2549	241.223	244.612	235.44	253.339	22.6688	306.417	302.553	311.531	307.528	52.6969	3002.74	3169.62	3231.49	3299.63	98.1116	9610.18	9394.05	9624.37	9465.7	136.903	10100.8	10047.2	20406.1	20945.2	191.998	45415.9	27638.9
13.3933	35914.2	19365.3	103522	26.2417	41262	25533.5	128532	2.33207	3633.86	2766.84	10296.4	3.17936	62.3693	68.328	62.4991	66.2075	7.05446	191.083	182.673	183.959	187.243	15.7992	218.089	214.767	227.427	217.729	24.5181	331.86	334.243	332.387	351.704	51.3037	3090.1	2922.23	2928.56	2922.81	91.1618	9412.73	8626.89	9362.05	8576.54	136.134	10127.5	9821.59	20494.7	20296.4	180.661	46570.2	27030
7.387	20134.2	11363	53725	29.2005	48083.3	28354.8	143801	2.68496	4317.71	3144.81	11480.1	1.73353	34.3263	36.0431	34.3984	34.524	5.28458	146.327	139.044	141.659	135.923	16.8677	240.016	230.344	240.604	242.941	27.8061	372.703	366.671	364.152	388.404	51.8972	3249.84	3032.01	3209.51	2986.83	82.5229	8206.41	8443.43	8368.77	8149.69	149.489	11389.3	10632.5	21715.3	22017	150.502	38750.7	22241.9
6.36363	17608.1	9433.91	49557.8	19.2956	30250.1	19069.1	90359.9	2.59538	4229.18	2920.44	11205.6	4.78124	102.773	98.7681	93.2557	102.237	8.37222	225.711	223.542	227.461	231.977	16.0656	217.515	224.041	232.994	221.498	28.1258	383.753	372.904	404.614	380.644	38.1747	2171.21	2203.91	2324.23	2266.56	84.7613	8087.79	8539.78	8784.17	8527.44	143.102	10266.6	9903.3	20679.2	21588	188.613	45141	28784.5
14.9798	41086.4	22202.3	110943	24.5153	37564	23136.5	116242	2.76956	4565.55	3233.4	11534.5	3.24057	63.3714	68.2513	64.4969	64.2343	6.99214	184.003	186.333	195.644	183.594	16.7297	235.161	237.926	226.786	226.382	29.0682	418.166	400.698	394.823	400.306	38.8799	2330.22	2374.91	2418.8	2331.54	60.1589	5776.73	6071.18	5990.27	5836.8	147.64	10956.5	10308.1	22484.7	21424.5	158.042	38353.2	22971.9
10.4517	30705.7	15152.5	77898	13.0965	21385.4	12395.7	64299	2.26943	3539.14	2621.89	9918.19	1.53775	31.4754	31.5616	30.5744	33.0708	5.23861	144.607	147.575	136.337	141.239	13.9559	190.586	191.811	204.263	198.091	27.2973	376.358	388.716	389.719	373.02	36.1741	2061.86	2216.65	2139.83	2061.71	63.1019	6483.57	6153.43	6421.91	6529.41	117.384	8365.83	8530.49	17235.7	17619.1	184.696	47061.6	25788.1
7.23195	19652.9	10112.5	52421.3	23.6969	36659.4	22811.9	118437	2.5715	4147.13	2940.66	10627.2	1.25523	26.6665	26.5251	26.3935	25.939	5.77207	157.323	162.81	150.769	160.877	10.6415	152.96	155.398	155.747	153.025	21.3253	294.584	293.168	286.354	290.019	58.3341	3572.59	3445.66	3317.38	3412.26	95.3886	9172.86	9192.41	9470.48	9745.22	142.534	10128.1	10272.4	19809.2	21523.1	170.06	43805.8	23661.7
16.5536	45853.3	25047.8	125149	33.8893	53648.3	30829.8	164426	2.46768	4086.47	2804.08	10282.2	3.03679	62.0988	59.2656	62.3645	64.7368	5.38121	148.443	143.755	138.524	142.648	10.4812	141.125	147.296	147.637	152.611	26.9602	377.544	361.417	374.92	362.471	47.4292	2710.14	2827.68	2698.83	2732.06	61.2706	5779.9	6243.78	6131.56	6351.3	128.772	9400.57	9107.67	18325.3	18696.3	151.524	39426.5	22707.3
8.5706	23071	12842.5	62180.8	34.8957	55953.4	33924.9	178477	2.37522	3874.6	2755.36	10506.4	2.60547	54.5336	53.1386	52.4386	52.9484	5.10831	131.985	142.002	137.709	133.873	14.6844	214.375	199.834	216.573	200.558	20.1608	276.441	265.112	267.039	280.765	40.4343	2455.23	2378.63	2351.05	2384.21	96.1852	9436.7	9871.41	9692.74	9182.01	121.078	8562.22	8483.39	18230.3	17956.1	163.224	40577.3	24642.6
7.94764	21203.8	11676.7	61918.1	10.4674	16702	9884.04	49264.2	2.7175	4404.64	3310.41	11081.4	4.80634	96.3414	95.1954	99.6096	93.7093	7.71332	204.076	197.188	210.37	211.733	11.4746	160.217	156.184	156.428	158.078	21.6797	289.236	286.991	286.14	311.564	50.8052	2912.55	3164.42	3061.29	3045.91	94.8783	9551.74	9374.72	9225	9546.53	128.87	9215.52	8891.4	18712.8	19350.7	194.241	48214	29777.5
15.9283	42513	23820.6	118159	11.1093	17962.1	10899.4	56660.6	2.17347	3608.24	2676.17	8975.07	3.49323	68.6839	70.7946	73.4614	70.6002	5.88448	154.846	152.31	163.627	151.562	11.0746	152.934	159.401	157.535	162.504	20.9652	278.317	301.129	289	294.933	47.7453	2808.38	2995.19	2866.19	2874.47	69.2679	6625.34	6639.13	7030.11	6859.41	121.634	9261.79	8666.1	17882.5	18147.9	151.761	38795.7	22129.3
11.159	30480.6	17027.1	86606.8	25.4847	42216.1	23056.9	127588	2.55868	3880.47	3048.5	10419.7	4.64853	99.3334	99.5109	95.5132	97.2986	6.23301	163.217	163.953	160.673	175.279	18.9	275.85	274.144	273.203	256.504	28.239	400.472	403.127	379.925	380.405	37.9572	2336.41	2291.58	2203.27	2263.25	81.8745	8013.03	8384.61	7972.18	8464.87	142.35	10687.9	9761.59	21604.2	19894.9	184.485	47999.1	26636
16.6461	46147	23311	130020	25.2097	40245.9	23128.6	118183	2.88254	4385.46	3277.93	12536.9	2.04795	42.8923	43.7643	40.1792	41.1881	8.47934	233.33	233.7	237.247	224.17	11.0965	160.468	155.322	153.947	163.254	23.7183	314.616	331.697	316.837	325.589	52.2422	2996.08	3034.08	3009.64	2999.78	67.8335	7035.25	6881.92	6588.97	6644.48	111.269	8428.49	7914.82	16788.4	15580.7	192.631	49280.1	29379.5
10.4439	29119.6	15749.8	79095.7	20.244	33314.4	19720.3	101888	2.17759	3470.8	2465.29	9165.93	4.7546	96.979	96.5751	99.5946	98.7609	9.38057	259.284	244.517	263.346	258.654	19.5175	272.84	275.877	276.493	282.003	26.0076	342.292	350.814	364.138	371.692	47.6365	2935.19	2887.91	2768.12	2888.45	65.2118	6731.28	6490.25	6339.87	6679.96	126.651	9273.72	9105.28	18655.9	18502.2	180.873	45011.6	26261.5
17.6804	49239.7	26060.8	130765	29.7321	48894.8	27503.6	139561	2.3452	3562.16	2714.43	9440.04	3.79243	79.3308	78.4232	75.3017	75.0835	6.09837	163.456	167.438	159.059	157.691	15.4135	227.375	227.992	218.624	222.397	26.6581	382.353	367.308	354.047	355.247	39.0943	2405.05	2248.94	2267.86	2221.02	70.0093	6902.2	6800.77	7097.39	6792.48	140.538	9965.4	9357.71	20676.9	21458.8	183.16	46869.9	26408.1
6.2756	17714.8	9536.54	45260	23.3118	38207.5	22130.9	115059	2.47304	3901.86	2964.87	10174	1.08182	23.1065	21.0937	21.286	22.9406	6.4393	177.827	174.584	173.272	176.78	15.9868	228.433	237.072	227.756	219.114	29.9496	397.293	393.801	401.772	407.23	59.0724	3570.58	3515.53	3356.2	3440.75	91.0078	8786.17	9182.02	8602.85	9212.37	103.244	7559.34	7438.22	14803.6	15462.7	162.972	42027.8	24793.5
13.7538	39796.9	21065.2	108706	29.1226	48426.4	28078.7	145121	2.37243	3622.95	2670.46	9838.79	3.94524	79.7432	82.6534	80.5664	81.7133	5.11566	142.682	140.238	137.748	135.974	17.3743	236.887	246.162	253.128	247.195	21.8602	299.929	304.581	293.396	314.252	56.4719	3221.08	3419.89	3229.39	3542.5	81.0794	7937.5	8009.92	8236.92	8047.01	122.222	9058.09	8476.53	18592.2	17183.5	188.516	46935.9	28751
11.6951	34174.1	17137.8	86931.2	16.03	26472.7	14389.3	78083.4	2.26215	3448.16	2728.07	9082.89	2.53037	52.8971	50.9248	52.9859	51.786	9.04521	254.027	255.133	246.78	245.131	18.1331	251.385	268.198	265.969	246.091	29.3244	393.202	409.14	402.069	417.403	34.6391	1967.89	1971.71	2040.68	2117.33	76.9457	7388.75	7778.14	7708.06	7337.81	142.929	9940.9	9915.54	20503.9	20998.7	174.678	44486.9	26502.4
13.0064	35061.9	18874.7	93756.8	16.7397	26441.9	15978.3	79922	2.0541	3419.03	2498.16	8331.69	2.78741	55.3775	55.5208	54.3235	55.5533	8.77621	242.855	244.925	246.792	247.466	19.027	275.601	270.429	272.115	268.635	24.687	340.655	344.11	342.677	330.85	52.853	3240.45	3200.5	3101.71	3242.03	73.3389	7226.99	7454.46	7033.92	7567.12	147.452	10553.5	10152.9	21673.1	20941.2	151.078	38141.9	21720.5
12.5634	35152.5	18855.9	94127.8	30.0718	49104.9	28015	152807	2.43277	3799.94	2854.7	10704.8	1.18633	24.7282	25.1246	24.3174	23.9383	8.22032	218.944	211.827	226.118	217.543	19.8618	293.885	290.945	283.965	282.192	20.4462	286.589	292.741	289.084	270.057	42.0033	2499.19	2435.16	2408.14	2631.21	66.0297	6597.34	6818.7	6554.32	6551.54	126.301	8925.34	8966.52	18793.2	18592.5	164.192	39622.7	23884.1
11.5861	31155.3	17450.5	90171.1	15.7394	24986.4	15258.4	76572.2	2.19513	3627.37	2508.06	9394.51	2.07341	42.074	42.8503	41.8433	42.9726	7.09811	192.192	197.177	182.78	190.195	14.1721	201.232	208.889	206.167	190.794	20.9376	298.676	300.686	300.477	275.537	34.5699	2082.99	2083.25	1991.32	2027.37	69.9203	7128.76	7120.67	6645.48	7217.37	105.661	7600.68	7702.21	15672.3	15458	162.435	39870.7	23119.9
16.1062	46514.8	24246.5	123998	32.7405	52277.1	31767.8	163252	2.73649	4183.57	3275.4	11192.4	4.77039	99.1951	95.3488	99.4037	100.511	6.24697	171.464	165.157	160.934	175.008	11.9389	175.133	170.052	173.181	173.107	23.8036	338.483	328.898	338.172	313.211	59.5846	3628.44	3587.84	3521.39	3701.87	87.22	8926.67	8792.11	8300.61	8204.06	105.3	8044.56	7085.42	15450.5	15276	164.831	39096.7	24317.9
12.3697	35933.1	19054	92087	32.228	53318.5	29596.6	162370	2.70574	4505.07	3278.85	11061.6	2.67548	53.3572	55.1104	52.0776	52.7485	5.95426	164.845	161.077	163.069	165.949	15.7275	224.636	230.669	211.532	226.981	27.0328	379.28	386.729	374.815	370.758	47.6333	2878.65	2835.88	2787.53	2839.58	72.1208	6815.01	7414.82	7345.02	7073.76	136.529	10364.3	9131.04	19305.1	19111.4	177.862	43575.4	27204.1
12.7673	36793.8	19499.5	94672.1	23.6946	37467.3	21341.3	113318	2.32928	3779.35	2741.54	9511.53	1.72502	34.2528	34.3472	33.6028	34.7607	9.94797	255.493	261.975	256.225	258.583	17.8722	262.059	240.218	251.054	251.97	27.1766	377.194	390.09	384.413	366.708	32.7813	1937.06	1914.69	1906.24	1888.55	77.9072	7604.59	7896.44	7491.32	7443.8	121.222	8740.54	8736.79	18335.6	17539.8	197.662	49300	29658
7.95055	22380.4	12130.3	61192	23.8368	38720.2	21889	121160	2.75399	4438.09	3383.94	11702.2	3.10407	60.8971	66.2089	62.1308	66.662	5.37964	137.527	137.972	143.28	150.799	16.6366	234.142	232.647	246.884	243.932	23.2429	304.367	327.779	316.661	334.926	50.9966	3086.08	2936.27	3148.18	3001.84	94.1569	9150.31	8989.73	9271.66	9104.8	115.643	8767.92	7779	17121.1	17500.5	164.29	42677	24136.8
18.0355	48028.2	27258.3	141927	28.0879	46085.3	25405.7	142185	2.02592	3211.89	2336.72	8153.35	1.51756	31.357	30.9254	32.0155	32.0456	7.73659	202.061	206.739	198.857	210.024	10.6532	154.942	157.483	146.344	149.746	27.0629	383.219	361.939	391.486	385.158	44.5281	2777.42	2652.46	2537.69	2714.45	71.1645	7079.8	6777.44	6805.11	7310.26	146.357	10561.1	9859.89	21946.6	20972.6	166.457	39621.8	25105.8
11.3363	32092.9	15997.6	81770.9	34.9831	58028.9	34590.2	169756	2.15705	3453.87	2456.32	9363.26	4.13897	83.7441	86.152	88.7504	84.6544	9.58392	268.509	246.322	266.805	258.38	10.1715	145.042	148.234	139.685	146.416	29.3017	408.888	418.992	395.685	409.189	54.4324	3215.54	3351.97	3373.72	3385.66	92.4292	9052.16	9333.19	8928.15	8781.44	117.013	8794.63	8374.87	17246.4	17837.6	189.733	45752.9	28084.2
12.2616	35599.1	18498.9	95658.5	26.0544	42266.9	24088.4	129392	2.66744	4408.11	3180.17	10812	3.12614	63.0694	62.8078	62.6994	62.5067	9.88594	258.269	272.764	274.324	277.251	14.4941	204.992	209.283	203.048	203.959	25.3233	347.616	355.611	355.892	346.128	58.0654	3316.25	3476.06	3524.15	3393.42	60.9457	5925.69	5927.34	6014.46	6095.12	127.604	9445.02	9207.91	17971.2	17914.1	189.981	45220.6	28459.3
7.45684	21398.2	10401.9	55247.7	29.0183	46587	26081.2	149069	2.40043	3915.36	2849.15	10196.7	4.73523	96.0566	98.7798	94.5351	93.23	5.41354	144.868	140.278	138.786	144.009	15.0343	215.114	222.766	222.66	203.782	28.6082	410.529	404.444	401.433	412.378	47.4945	2875.11	2831.69	2768.99	2706.69	75.3215	7359.91	7177.98	7748.69	7260.03	137.248	9657.44	9755.43	20109.2	19177.1	166.783	43307.2	25549.4
8.60846	23031.5	13150	62340.4	18.0751	28571.2	16948.8	90652.7	2.95871	4636.24	3541.78	12881.3	1.27848	25.1674	27.2813	25.421	26.1127	7.19058	193.546	192.656	202.799	194.697	11.128	161.286	157.646	153.883	164.128	23.5848	326.531	314.265	337.765	332.457	51.9554	3181.96	3193.81	3195	3021.94	74.3321	7259.37	7363.23	7384.06	7709.07	137.29	10321.2	9248.41	19959.6	20395.8	192.278	45668.6	28375.8
10.2875	29255.8	15430.6	79039.5	11.338	17404.3	11185.9	53617.5	2.20034	3460.4	2489.11	9703.74	3.847	78.7213	79.1257	76.9561	77.6147	6.48298	167.304	169.333	171.209	181.878	12.8818	173.788	177.844	184.472	176.516	24.6057	336.489	347.051	345.995	337.101	50.7954	2964.35	2923.35	2959.7	2970.07	87.4042	8646.81	8866.92	8482.7	8899.92	128.331	8979.85	8833.24	19479.5	18951.6	195.177	46682.2	27622.2
10.7885	30140.4	15264.2	79680.8	21.884	34986.6	20091.5	107183	2.62696	4340.26	2939.53	11264.5	3.67995	74.9389	72.0726	73.2875	76.0883	7.97033	213.233	220.014	204.521	224.22	17.5042	257.067	235.521	251.08	259.811	29.8344	425.461	430.204	430.477	425.292	55.5681	3361.79	3459.7	3286.28	3195.49	97.9437	9504.93	9529.81	10093.5	9707.31	140.573	10579.5	10312.7	19706.4	19593.6	190.763	45030.7	27708.4
19.5874	57174.2	28127.6	147199	33.8344	51876.6	31505.5	158592	2.59705	4208.5	3027.61	11253.9	2.92462	61.2894	60.8564	61.3457	57.0366	8.84865	244.599	237.222	233.057	226.698	11.7217	170.016	165.239	166.567	160.611	23.0074	312.053	314.877	330.539	317.386	40.7116	2394.24	2523.37	2537.26	2539.06	65.9988	6216.25	6410.28	6376.79	6661.38	100.18	6964.53	7043.76	15151.3	14431.1	189.176	46101.4	26416.7
13.9377	38824.4	20958.1	106834	13.7132	21039.2	13492.1	65067.9	2.70952	4250.92	3330.37	11826.4	2.19493	44.0511	46.5392	47.0743	44.0783	9.85902	275.185	275.119	262.968	275.99	10.8681	156.261	153.179	148.568	151.196	22.0394	288.952	299.732	302.292	289.845	46.6618	2870.22	2890.71	2682.92	2924.58	91.5693	9174.42	9311.75	8973.34	8902.73	115.226	8538	8279.67	17543.8	17565.1	173.309	43495.5	26236.3
14.9836	40473.4	21832.4	115647	38.6806	62611	37127.9	190549	2.45478	3826.28	2992.23	10849.7	3.29749	65.79	68.9816	70.6764	65.4169	5.56177	155.615	154.74	149.301	154.522	11.2331	162.506	160.102	151.125	160.625	29.728	391.666	389.552	408.112	415.01	34.209	2015.23	1982.26	1979.98	2036.83	97.7827	9749.06	9243.06	9932.94	9376.8	101.235	7432.23	7325	15215.4	14995	178.763	46284.5	24935.9
12.5999	36742.9	19131.2	97717.4	18.1375	27784.2	16425	88737.3	2.34485	3750.24	2723.66	10346.5	4.6264	98.5504	96.5825	96.8736	99.0378	9.60149	270.582	258.133	266.712	262.783	17.229	254.882	237.256	250.042	250.626	22.0626	305.753	298.258	312.919	294.756	57.9748	3533.7	3446.57	3408.73	3631.76	79.3595	8106.99	7766.02	7694.09	8120.74	137.35	10472.7	9790.37	19253.8	19868.2	174.536	41739.7	26003.3
5.53126	16218.7	7813.09	42260.9	36.087	58434.5	34707.1	174564	2.11297	3488.11	2562.73	8961.38	3.46829	71.6128	73.4537	68.6739	70.0545	5.80345	148.575	148.862	150.042	155.731	19.6623	280.677	274.389	268.926	270.008	22.2556	310.753	318.597	302.423	315.034	53.2752	3039.52	3182.25	3298.5	3161.56	72.9348	7093.28	7354.04	7465.67	7275.92	123.848	8774.59	8867.07	18786.7	17836.1	153.817	36485.5	23009.8
14.4926	39917.7	21250	114169	21.7316	36032.2	20893.6	108338	2.31816	3653.28	2646.4	9862.09	2.97006	59.593	60.612	59.6631	61.434	6.76359	179.639	178.944	182.884	179.057	14.222	210.108	194.696	199.409	197.287	21.4438	290.732	286.116	302.326	308.188	41.32	2558.24	2353.09	2444.19	2433.41	92.9464	9055.59	8972	9232.72	8771.52	109.599	8364.15	7677.63	16403.4	15641.1	161.758	41986.1	22661.7
15.5754	43321.8	23677.8	122141	10.2188	15731.9	9808.7	51885.2	2.89683	4648.64	3255.98	11889.4	3.21759	68.9553	66.021	66.2195	67.7757	9.3058	260.383	247.391	240.478	255.479	18.932	269.462	268.589	277.049	255.127	28.9037	411.626	385.177	410.944	383.716	42.9724	2624.58	2504.04	2535.82	2496.18	84.8307	8294.93	8117.38	8406.17	8786.42	130.458	9316.18	9090.7	19070.8	18316.5	194.394	46653.4	27801.9
6.89662	19548.7	10200.2	52211.5	14.4741	23549	14114	73213.6	2.4062	3872.43	2846.68	10099.4	2.69074	55.6665	52.7632	57.7297	53.2515	5.25647	145.432	147.549	136.46	140.957	11.4713	163.37	156.042	165.987	158.223	20.035	268.829	283.484	284.636	268.925	33.4494	1908.77	1975.86	2021.28	1978.16	96.8654	9506.13	9322.63	9596.37	9437.63	128.312	9114.57	9023.08	18401.2	18689.5	171.84	42259.6	25386.5
18.7588	52336.7	26928.8	134238	19.201	31443	18605.9	97046.8	2.38139	3641.66	2858.63	9775.04	1.67627	35.7823	33.1797	34.5926	32.7197	5.95809	161.772	167.013	159.404	159.62	19.5739	282.653	265.532	287.388	279.56	21.6684	292.522	312.556	288.751	293.432	32.3741	1938.3	1963.6	1893.01	1908.31	64.6296	6240.96	6483.99	6415.91	6231.74	144.615	10127.4	9733.23	22090.9	22150.1	156.162	39079.5	22554
5.41404	14466.9	8016.2	40818.4	21.1559	32640.6	20200.3	107653	2.32441	3848.81	2631.14	9669.31	3.51399	71.1297	72.6077	68.9386	75.0463	7.03756	188.274	180.645	192.517	184.557	14.0781	198.94	198.129	189.818	203.256	20.5086	271.628	272.564	271.126	272.591	57.9255	3391.16	3380.92	3300.31	3332.77	90.922	8706.69	8689.36	9047.51	9400.43	137.573	9562.76	10107.4	20119.3	19968.3	176.829	42202.1	24606.2
10.9775	30399	16354.5	78644.7	16.9869	27255.6	16504.2	85761.2	2.57962	4149.95	2931.43	10841	1.55719	31.5223	30.536	31.8766	31.8778	8.55407	220.041	223.327	228.14	223.419	12.3232	175.483	172.034	177.202	176.44	20.8048	277.447	280.626	281.003	299.811	49.2228	2928.57	2911.42	3017.77	3073.24	63.8467	6470.74	6222.98	6473.15	6469.88	113.913	7908.63	7987.04	16479.6	17323.9	157.568	38749.1	24101.8
5.11785	14276.8	7679.76	39831.2	16.8582	27249.3	15996.8	84670.3	2.79353	4239.28	3401.79	12028	4.79259	96.0421	97.6244	96.7551	99.4024	8.23626	231.825	226.81	221.088	219.752	14.5649	201.781	196.124	208.466	198.892	25.7077	343.93	354.66	362.669	360.033	51.6034	3215.78	3069.02	3129.95	3014.99	94.2717	9074.53	9480.95	9083.05	9162.19	140.982	10226.3	9585.89	20645.7	21113	188.357	48131.6	26639
5.39215	15820.6	8249.54	41937.8	17.1263	27597.8	16280.7	86174.4	2.49173	3757.01	2821.23	10866.9	3.13366	65.9649	64.2921	63.4682	61.0816	9.70496	267.753	250.598	269.988	255.372	19.0722	283.077	264.844	264.841	280.186	21.5037	286.835	290.854	306.567	296.044	57.9347	3373.67	3599.04	3594.31	3379.73	88.1281	8307.75	8612.23	8469.1	9047.61	142.297	10200.9	10368.7	21140.1	20337.9	168.287	40909.1	25018.5
5.23698	14991.6	7524.94	38261.1	20.5573	33990.1	19973.9	103211	2.46692	3838.26	3010.68	9942.75	2.05264	42.4265	40.0856	41.7526	41.9751	7.685	211.293	204.127	198.672	210.548	12.5602	181.494	182.863	185.135	185.269	27.9212	379.772	376.555	383.037	369.187	54.1585	3233.1	3114.64	3102.78	3208.44	91.3583	9349.59	9331.57	8609.91	9048.94	125.951	9181.44	9160.31	18053.9	18533.3	157.677	39958.5	24150.3
5.46837	15414.4	7660.67	39342.7	19.8585	32510.6	19002.4	101741	2.75146	4387.02	3330.44	11577.5	1.11325	22.0953	22.8748	22.9619	23.1997	7.82145	217.679	201.073	211.96	207.928	18.5552	273.288	254.525	251.404	273.863	25.9277	351.932	361.315	368.279	346.109	32.9115	1945.82	1967.33	2032.99	1941.62	64.953	6613.41	6231.44	6714.13	6283.86	146.261	10924.5	9985.2	21387.2	22336.6	160.241	40794	24442.4
10.4876	28124.6	14749.4	82713.7	15.0602	23376.1	14038.8	75445	2.36739	3759.86	2644.3	9732.24	1.63697	33.7913	33.2018	32.112	32.7558	8.86378	240.149	244.357	236.444	240.846	14.3718	213.002	196.181	197.677	208.038	21.779	308.882	286.285	307.084	305.53	40.0465	2356.85	2296.54	2386.8	2339.67	75.042	7202.47	7406.83	7274.57	7112.88	124.012	9209.07	9082.89	17968.5	17664.7	163.722	42177.2	23768.7
10.0683	27464.1	14734.9	75173.4	18.3743	29532.8	16529.8	93830.2	2.06513	3333.32	2507.5	8461.54	3.07267	61.1807	64.1937	61.3444	63.5687	6.87426	192.084	188.865	185.222	186.208	16.4632	228.843	222.613	229.332	229.358	24.4797	326.12	351.048	342.363	339.657	41.0087	2420.13	2447.61	2471.56	2349.57	81.9414	8356.3	8240.5	8241.15	7704.49	100.882	7659.14	7251.53	14868	14849.3	162.967	38631	24418.8
13.2412	36952.2	20306.5	98977.9	30.8144	48662.2	27684.4	157300	2.00175	3274.95	2432.42	8034.99	4.51783	95.1048	90.3808	93.1731	89.3353	6.76691	177.42	177.205	189.272	175.425	15.3981	215.362	210.356	219.091	224.723	29.4776	419.21	419.022	419.238	398.482	45.5095	2585.45	2588.81	2754.59	2802.87	99.5017	9922.91	10041.2	9768.95	9706.41	147.002	10515.3	10411.1	20557	20756.7	183.889	43654.5	27054.8
16.8744	48460.2	24040.2	132938	12.9654	21572	11845.7	62158.8	2.66432	4201.13	3181.77	11262.8	3.2582	68.4751	69.2867	67.1226	66.9373	5.54916	150.725	144.607	152.249	147.827	19.8621	287.803	283.559	288.378	280.629	25.746	344.521	347.469	342.542	366.689	38.5075	2220.01	2269.04	2364.95	2273.99	61.9702	5836.85	6102.27	6278.7	5870.62	101.609	7696.58	7405.17	14316.7	15336.7	156.102	40642.4	23135.6
16.5436	45566.8	23645.7	124364	33.1673	53339.8	30125.6	166546	2.57975	3930.36	3117.06	10518.1	1.336	26.0317	27.2308	28.4195	28.5029	8.88066	240.676	238.954	233.718	240.507	13.7368	187.955	195.736	186.228	201.881	27.8122	384.352	388.845	394.9	390.701	35.5198	2152.74	2217.54	2032.28	2060.68	65.4098	6507.72	6439.38	6179.26	6678.69	102.817	7690.99	7556.03	14962	14560	193.111	46753.6	27023.6
15.4745	43401.2	21966.3	112364	39.0979	61287.5	37424.1	194293	2.97347	4664.74	3423.17	12884.5	3.0524	60.7218	61.5678	61.418	64.2105	9.43547	243.15	258.981	264.405	244.493	19.256	265.555	279.115	267.826	266.556	24.126	328.606	323.747	326.208	327.657	45.1414	2608.53	2826.53	2633.18	2677.93	67.0419	6808.7	6451.75	6536.7	6356.41	131.382	9973.35	9633.78	18730	19848.2	151.94	36383.7	21444.3
9.12617	25304.4	13329.2	65323.8	12.2871	19837.4	11745.9	60650.3	2.14882	3448.92	2611.82	9323.04	3.16844	62.2138	62.8834	62.4221	61.8884	6.04919	168.506	163.557	170.583	164.112	19.7312	272.967	266.936	277.529	289.811	25.0049	357.529	338.225	339.654	353.964	36.9583	2287.37	2184.53	2261.64	2171.31	95.8023	9792.22	9013.9	9593.87	9886.09	111.782	8406.88	7977.16	16074.7	15563.2	186.293	44739.5	26813.8
8.22786	22955.8	12636.3	62303	23.6682	36137	22254.3	117378	2.31737	3559.22	2805.15	10146.3	2.39405	48.4492	46.8158	47.966	50.2982	7.90385	207.248	209.343	214.99	223.313	17.3903	239.992	249.594	252.934	244.895	29.2472	396.443	396.01	420.199	382.874	42.8615	2503.39	2588.87	2642.96	2463.18	79.535	7876.57	8140.57	7751.19	7758.55	128.669	9135.12	9040.92	19380.5	18625.9	193.282	45565.2	28930
17.7629	50043.2	26417.7	132405	37.3962	61778.8	34071.7	188204	2.07273	3303.13	2360.19	8628.5	3.51863	69.6683	71.4289	69.7275	70.0475	9.00542	242.187	233.02	240.159	244.927	19.3902	274.157	274.223	262.233	271.066	23.9926	340.346	324.152	343.643	341.577	44.1031	2685.24	2594.3	2727.64	2624.65	77.0004	7384.73	7957.63	7918.83	7931.74	140.31	10055.8	9661.16	20083.8	20466.9	150.369	36438.8	21192.6
5.58227	16033.3	8395.02	43836.7	20.462	32272.1	18906.1	105124	2.16859	3449.92	2658.66	9413.21	4.39893	90.6405	86.7605	92.5356	85.7265	8.33791	219.336	233.633	224.752	227.288	10.2311	144.829	147.363	148.866	150.201	29.154	418.888	416.538	397.215	418.098	37.4613	2263.96	2289.01	2188.86	2278.09	70.4943	7109.02	7277.15	6924.35	6721.33	115.597	8817.4	8504.8	17028.9	17479.8	197.983	49920.1	27896
18.2816	49898	26187	136777	15.3212	23919.2	14298.7	77853	2.41174	3760.29	2937.84	10082.4	2.726	57.7973	57.1595	58.5719	56.241	5.3125	145.306	141.519	140.832	143.239	15.4509	220.089	208.583	229.28	215.037	24.8236	356.937	330.035	347.345	342.185	38.9825	2389.91	2412.63	2391.28	2413.93	99.5262	9467.07	9728.84	9524.38	9871.37	114.447	8672.21	7703.13	17141.5	16119.3	181.707	45048.6	26556.4
6.10337	17804.4	8748.59	46106.7	21.1218	33232.8	19026.2	103096	2.51022	3988.84	2978.08	10332.1	2.36643	48.4747	47.4404	48.231	46.5347	8.12029	214.977	225.317	223.257	224.827	19.0457	272.811	266.312	277.063	279.39	22.5811	312.361	309.492	313.818	317.284	33.6245	2025.04	2015.01	1959.36	2081.99	91.2988	9055.77	9233.19	8681.58	9159.05	126.234	9152.53	8442.72	19007.3	18694.7	182.395	46138.2	26552.5
7.33803	20448.8	10339.1	55153.3	27.0747	44791.4	25040.1	131333	2.69595	4216.48	3260.14	11927.6	2.94978	60.3968	61.6922	62.4068	61.9771	9.87151	265.932	276.201	253.444	273.48	11.1291	157.612	164.514	161.694	159.231	22.5622	321.801	302.835	297.256	303.728	56.1361	3330.51	3283.98	3373.73	3508.17	76.0445	7667.56	7616.72	7578.94	7326.27	132.16	9263.18	9514.51	18896	19952	183.87	44692.5	27174.9
8.48922	23543.3	12178.2	62072.9	20.6113	31354.2	19137.4	98656.2	2.371	3743.41	2771.94	9780.08	3.61796	72.8124	72.6544	77.192	76.7333	8.26891	230.663	233.224	213.761	228.68	10.606	149.525	150.794	153.242	156.176	26.4638	354.818	367.235	354.643	368.115	44.8464	2604.96	2628.92	2625.43	2758.7	69.9895	7091.27	6811.14	6918.98	6986.08	149.967	10954	10580	21967	22443.5	167.928	42440.5	23631.5
18.8565	55127.3	26880.3	140717	21.4275	34830.6	20736.2	105535	2.79328	4447.49	3318.25	11403.9	3.94184	80.5638	81.9901	81.482	77.0697	9.33729	246.124	250.509	245.546	240.716	12.2795	181.595	177.55	167.809	174.836	28.8342	392.532	407.758	395.353	391.162	35.5343	2217.94	2090.78	2101.71	2040.48	79.3723	7701.22	7758.9	7596.86	8230.46	103.766	7735.31	7316.99	14908.6	15142.3	173.234	45027	24761.8
14.5713	40821.9	21891.6	113853	31.3876	50535	29531	153647	2.70299	4359.99	3131.79	11795.5	4.50077	90.6516	89.8624	93.049	91.4543	5.07607	139.35	139.798	134.182	140.225	17.6484	239.928	249.447	259.845	258.094	26.6	384.839	379.851	348.242	348.794	38.5847	2335.05	2253.68	2232.46	2294.35	82.7898	8573.27	7785.91	7811.53	8399.66	145.516	11097.3	9826.17	20473.3	22207.7	156.759	39111.3	23677.8
9.63532	26531.4	13762.6	69248.1	27.461	45789.2	25988.6	135863	2.76366	4407.93	3092.3	11531.5	4.189	85.0953	82.1068	82.4074	89.8765	6.15277	168.632	164.7	161.235	166.968	16.0014	220.376	235.998	218.978	225.988	27.2735	376.149	372.406	377.645	386.055	59.7006	3704.43	3652.51	3416	3517.1	82.1557	7985.21	8097.46	8259.16	7876.54	111.429	8475.84	7539.93	16843	16151.6	170.345	42098.2	25330.2
8.37714	24519.2	12845.6	64566.7	32.0849	50468	28821	155359	2.50377	3781.73	3015.39	10964.9	1.43372	29.8293	28.4476	29.4341	29.5034	7.15195	188.756	199.713	190.266	192.95	19.4526	265.791	276.093	269.594	268.214	20.8797	286.794	279.871	300.556	296.224	36.4823	2188.75	2209.76	2189.15	2105.52	84.4567	8290.34	8045.9	8507.46	8184.37	101.332	7326.41	7083.42	14167.1	14306.1	179.082	46533.5	26807
19.7523	53802	28657.2	149542	10.3365	16601.7	9359.19	48758	2.50671	4103.58	3063.25	10535.7	4.69646	96.124	98.3936	92.1589	97.827	9.45045	255.753	265.979	261.128	263.315	13.8832	189.551	193.269	203.592	192.859	21.237	283.526	287.401	288.887	290.33	54.6259	3348	3238.76	3279.07	3219.41	70.2679	7088.38	7048.6	6773.89	6736.43	125.778	8860.76	8975.2	19143	19266.4	151.05	37632.8	21692.3
7.66128	20578.7	11393	55146.7	32.894	52757.4	30590.6	155990	2.0903	3439.54	2471.38	8620.07	1.48182	31.1848	31.8652	30.9019	30.5115	9.96983	271.974	260.896	281.401	254.877	19.1324	258.276	282.992	261.349	265.722	23.3567	332.743	322.716	311.732	326.763	30.1989	1885.18	1811.49	1839.49	1760.97	70.6342	7264.27	6809.14	6817.93	6978	128.024	9406.74	9025.24	19546.5	19631.1	194.873	46276	27864.1
6.2571	18095	8898.84	47883.4	24.1604	36855.4	22105.9	120291	2.81119	4639.16	3249.62	12321.1	3.4526	73.1255	72.2399	72.0084	67.3071	9.15418	248.191	254.788	247.6	238.666	17.3121	249.41	251.578	252.545	254.879	21.1013	302.102	300.29	282.108	299.042	38.662	2199.51	2306.06	2270.44	2340.63	66.4607	6885.57	6872.26	6610.34	6522.32	135.573	9981.56	9305.56	19476.5	19505.3	192.777	46584.4	28238.1
13.7827	37575.4	20695.3	107604	24.6672	39460.4	22858.4	119757	2.10977	3216.36	2471.78	9020.71	2.09059	41.9794	41.7323	42.0732	40.8891	5.16613	143.614	142.835	143.938	140.135	13.117	179.421	181.61	180.774	187.363	24.7554	336.375	351.133	334.906	340.193	32.7197	2024.14	1881.93	1926.73	1913.83	79.4222	7740.29	7752.19	7700.77	8181.16	114.779	8379.86	8258.25	17562	17570.5	150.67	38345.1	21785
7.77785	21554.1	10875.4	60175.4	36.7936	59048.5	36050.4	172083	2.30955	3676	2780.42	9494.98	3.14056	62.212	66.9139	61.9729	61.8402	8.38795	215.791	217.27	228.012	216.12	13.6551	187.765	195.222	187.84	184.561	25.8439	343.792	345.518	352.145	342.51	39.6514	2393.48	2288.45	2475.99	2376.75	69.0387	6732.19	6594.28	6952.03	6668.41	136.62	9528.75	9451.76	19157.3	20260.1	150.368	38486.9	22177.5
16.3147	45619.2	24535.6	128054	34.6378	55146.8	34105.6	168933	2.5375	4095.85	2981.24	10497.2	1.35403	26.6178	26.7523	26.8887	27.2842	8.24758	213.331	223.902	222.409	215.489	11.7466	174.147	167.401	162.961	171.188	28.2873	373.624	374.784	374.612	370.511	40.1224	2337.18	2486.6	2433.86	2485.02	64.4122	6074.51	6315.26	6107.75	6094.9	149.113	11290.1	10510.7	21239.9	21032.6	186.51	48228.1	27779.1
13.6554	39256.5	20824.3	100834	23.9922	38203.9	22203.2	117208	2.26851	3471.17	2562.55	9962.99	2.79347	58.5316	57.3428	58.5601	57.0676	9.71188	249.166	253.196	265.495	250.425	14.0989	194.317	202.61	192.593	201.945	25.3271	333.817	341.574	340.703	357.381	38.2354	2324.13	2171.95	2375	2303.06	72.8913	6895.59	7378.06	7386.69	7093.34	109.393	8303.69	7707.54	15567.7	16254.5	193.43	47023.6	28432.7
5.66826	15681.6	8568.93	41751.2	37.8427	58453.2	36677.3	193452	2.51713	3842.38	2914.89	10419.7	1.08885	22.2126	22.5094	21.949	21.2662	6.55581	169.255	178.053	174.571	183.462	11.5636	161.522	155.967	160.126	170.017	21.3069	298.809	295.284	290.004	299.61	48.1523	2831.74	2958.03	2819.96	2910.53	90.2579	8907.41	8991.88	8822.37	9123.14	114.827	8634.43	8436.03	16568.9	16871.6	194.361	47462.5	28976.9
5.89148	16953.8	8514.31	42719.7	37.0161	57270.8	33187.9	181361	2.24224	3650.79	2522.24	9702.13	1.86028	39.4234	38.3928	39.0398	38.2904	6.21559	174.934	159.448	166.218	163.215	12.705	171.303	173.174	184.282	186.269	26.3384	346.558	376.202	377.56	361.7	45.0838	2774.81	2611.73	2628.85	2596.44	93.492	8895.59	9625.67	9507.47	9186.98	106.477	7852.12	7491.25	15704.9	16122	162.518	39982.5	23435.6
11.6772	31983.3	17599.6	91825.3	15.6748	25429.8	15046.2	75916.4	2.39641	3683.56	2858.41	10584.9	4.3998	91.5291	89.6061	90.1742	92.9837	9.04385	249.022	243.935	232.508	236.044	16.2038	239.025	222.981	230.119	221.741	21.9254	306.878	306.393	314.431	301.215	58.0389	3484.11	3301.45	3351.42	3447.45	99.0925	9966.32	10085.8	9606.09	9884.94	145.404	10286.2	10616.7	20604.7	21921.6	159.717	40855.3	23067.4
18.389	49518.3	26638.3	144553	19.1531	29141.1	17307.7	90189.7	2.6539	4412.92	3144.83	11655.7	2.01776	43.124	42.1223	41.8916	39.7118	5.94053	159.326	158.268	161.551	157.504	17.7453	253.116	238.594	244.611	253.777	20.6439	285.525	293.663	287.47	286.878	54.2843	3338.3	3312.7	3232.45	3248.48	76.9191	7750.87	7365.39	7345.65	7460.7	120.93	8687.62	8469.04	18074.9	17166.8	196.449	49382.7	30038
12.8139	36897.9	18784.3	96394.5	26.8903	41344.3	24505.3	132203	2.44283	3797.7	2984.88	10183.7	2.3811	48.3612	50.147	48.7026	47.3368	6.71741	189.008	183.552	175.209	182.989	12.0254	164.917	172.104	173.123	169.4	27.9357	384.699	371.102	368.359	365.752	30.9283	1819.54	1868.04	1937.08	1881.96	96.0249	9831.14	9609.76	9302.56	9574.34	116.982	8707.42	8356.7	16444	16706.4	180.539	45057.6	25620.3
16.9371	49445.6	24411.1	121942	37.4134	58709.9	36666.6	192214	2.16746	3448.28	2466.08	8913.7	3.82074	79.4976	81.1687	79.2701	76.1316	5.44899	141.164	141.127	147.651	147.415	15.1202	205.774	224.435	204.721	209.879	27.0717	369.23	371.757	368.883	375.748	49.012	3068.26	3058	2839.18	2974.75	86.7596	8814.07	8712.76	8913.46	8566.12	100.527	7135.71	6887.17	15000.4	14575.8	153.496	37004.5	21582.4
9.16177	26631.7	13188.2	68209.8	14.5134	24223.5	13223.7	67698.3	2.54978	3896.83	3048.34	10744.8	3.08762	64.5342	62.3385	65.1982	61.6379	7.47396	200.109	201.005	206.525	208.894	13.8213	191.973	189.543	193.443	192.021	26.2868	348.156	347.691	359.049	346.176	52.8317	3011.49	3227.28	3058.29	3111.87	83.6045	8392.98	8286.34	8014.59	8159.24	130.23	9161.81	9184.81	19320.3	18160	182.95	44022.6	27412.6
17.8315	48602.3	25351.8	128856	35.4603	57847.7	33942.4	171649	2.66006	4422.11	3105.42	11001.4	1.28046	27.3207	26.8727	26.4336	25.8793	9.65545	270.391	265.832	250.741	272.194	19.8171	268.491	277.48	290.353	289.056	21.9758	296.534	306.903	302.234	292.14	56.106	3374.85	3370.82	3291.9	3364.09	74.6225	7292.87	7137.96	7338.14	7323.86	132.912	9563.87	8895.3	19598.2	19558.1	188.915	47966	27972
8.61022	23807.7	12841.5	64528.2	17.116	28188.9	16122.4	82079.2	2.69648	4223.44	3106.18	11029.5	1.92987	40.4339	39.3432	40.065	38.0379	9.11435	245.808	256.398	250.943	236.52	10.3356	143.216	150.756	148.052	152.076	24.0096	327.188	334.38	339.123	331.927	39.7252	2329.99	2300.92	2485.16	2458.59	70.1937	7060.22	6897.49	7097.71	6889.02	113.679	7921.6	7982.3	17441	17433.7	150.799	38828.5	22849.3
5.7647	16429.2	8106.62	41830	26.5124	43796.1	24980.9	127619	2.13715	3319.68	2605.22	9435.29	1.60345	31.3388	33.2156	33.5061	34.4226	8.72103	238.73	239.891	244.533	241.667	14.8587	206.747	208.438	202.099	205.838	20.6027	280.444	285.414	279.53	282.533	36.5927	2230.03	2220.58	2251.28	2233.97	92.5502	9119.37	9162.39	9190.41	9341.27	126.834	9359.57	9148.18	18385.8	18490.4	160.277	38239.7	22518.8
15.9937	46510	22417	123228	17.4324	27317.2	16326.1	84916.8	2.47075	3838.51	2944.88	10063.2	4.98039	97.9336	99.3779	102.426	100.025	5.87145	156.789	152.857	150.282	165.827	14.3711	200.765	212.024	201.624	194.378	25.7326	363.481	359.967	365.355	358.779	48.4316	2789.96	2924.41	2900.66	2991.83	93.0654	8886.17	8947	9588.98	9045.67	149.441	11269.5	10506.4	22123.4	21943.8	177.699	43803.3	25093.3
11.0952	30073.6	15946.4	83493	19.4842	31430.8	18781.1	91360.8	2.36337	3686.95	2672.15	9984.05	3.66191	74.328	78.1979	78.2762	76.3961	6.47942	171.473	181.333	178.336	170.119	14.3962	201.872	193.459	202.635	212.575	28.6733	408.546	378.092	404.732	413.861	47.4394	2906.87	2788.51	2893.22	2737.19	73.5891	6995.09	7317.99	7614.24	7549.57	100.682	7518.58	7045.41	15323.6	14253.4	166.342	41292.1	25210.3
14.7045	42642.3	21775.3	113092	30.0089	50354.8	27557.8	150928	2.74149	4201.35	3277.24	11473.5	1.21722	24.4842	25.9329	23.9671	25.8138	7.31044	187.987	199.846	205.388	204.798	11.7661	159.464	160.659	164.09	164.29	22.352	313.397	306.713	309.88	297.342	35.2984	2041.84	2078.38	2076.92	2174.62	82.9905	8161.32	7939.33	8210.5	7989.35	147.87	10982.3	10495.7	20582.5	21150.1	177.395	42738.7	24714.2
14.2728	41016.2	21166.9	108476	25.1814	38387.2	24224.2	125297	2.6747	4212.94	3035.79	11073.6	2.58292	54.3385	54.7074	55.1409	52.2104	9.68689	272.523	268.942	266.418	258.157	19.9509	273.762	281.781	289.645	284.422	20.7158	276.132	286.381	275.51	295.498	38.7202	2299.7	2351.99	2381.74	2247.38	68.495	7055.09	7040.37	6918.32	6641.68	135.335	9551.5	9475.68	20312.8	19508.5	154.606	38728.6	22570.9
16.2535	43713.9	23509	121027	33.5131	52343.7	30940	169090	2.74561	4510.04	3109.3	11412.2	3.32291	66.2324	70.3365	65.0001	69.7965	6.28092	163.745	162.176	175.279	161.037	19.8978	284.914	282.481	290.353	294.661	21.2611	287.279	295.661	302.954	304.906	32.489	1981.93	1981.72	1897.29	1846.09	73.2771	7578.1	7448.08	7301.63	7449.99	120.402	8558.16	8781.66	16811.6	16969.1	174.416	42875	25522.3
11.5151	30633.5	16372.5	87153.2	38.2043	60486.1	36779.5	178914	2.06371	3259.29	2387.59	8378.12	4.67302	93.6861	100.115	93.2704	92.9053	8.35151	223.6	226.607	230.152	220.113	15.8555	234.595	228.196	225.829	227.347	29.692	414.566	423.932	411.088	402.413	52.3294	3126.35	3279.68	3257.4	3203.66	70.9605	6713.8	6801.68	6784.23	7033.17	109.503	7849.02	7537.06	16719.7	16638.8	196.243	48828	29040.2
6.35381	17704.3	9507.31	45452.6	37.3074	60048.2	33453.8	188021	2.46204	3831.92	2983.52	9884.03	1.28881	26.6827	26.4803	26.2055	27.3675	7.01727	197.593	185.337	188.322	193.577	13.4577	199.171	181.376	191.03	180.966	21.6111	304.28	285.448	292.361	288.67	58.7471	3530.14	3551.04	3568.6	3348.71	78.5613	7803.45	7820.76	7649.74	8116.66	136.984	10437.3	9737.93	19749.3	20366.5	168.448	40442.9	25650.6
13.0015	37441.8	18536.8	102273	26.3441	44020.7	25522.8	129199	2.88938	4598.74	3458.89	12287.6	2.4293	48.6433	48.8955	51.3663	50.3244	6.37065	169.749	178.557	175.446	170.325	16.8656	226.839	249.191	231.177	227.367	25.0836	349.832	337.859	336.66	354.569	59.6294	3582.38	3415.9	3693.27	3490.4	93.3088	9027.44	9063.54	9019.37	9443.45	143.46	10873.5	10027.8	21626.6	20076.6	165.56	42743.4	24084.7
16.3433	47798.6	23630	121938	38.8369	59194.1	36032.3	195907	2.21967	3347.66	2637.57	9479.4	1.00936	21.4124	20.4663	21.3325	20.2751	8.94767	239.038	243.602	231.715	239.656	13.1428	178.096	189.935	180.308	178.401	23.7195	317.904	341.037	328.449	327.002	49.6258	2961.44	2909.97	3029.86	2819.69	96.6604	9327.27	9411.18	9754.84	9702.55	115.213	8401.77	8134.97	16968	17279	160.819	38344.2	24680.2
15.625	43132.7	23005.7	120121	14.0505	22528.4	13650.1	67675.3	2.9194	4559.73	3428.02	12491.8	2.85268	57.3721	55.9945	56.7564	57.9349	6.98041	180.702	196.052	180.058	196.306	15.7766	218.164	234.241	225.672	212.914	25.1443	343.912	345.832	338.146	346.492	38.7156	2313.17	2224.99	2275.92	2246.58	63.1054	6196.75	6262.43	6267.12	5945.06	149.53	10446.9	10991.6	21390.5	21859.8	165.376	39181.9	23972.4
16.9078	49414.6	24490.4	131425	34.6261	52990.9	33639.5	175979	2.7213	4280.87	3049.43	10936.7	1.72702	35.7484	36.6233	33.8556	36.8893	5.95485	161.622	160.454	159.451	166.014	15.3416	211.13	210.646	207.423	227.7	26.1026	346.942	375.135	367.198	343.282	51.7104	3074.08	3100.91	3002.19	3196.66	76.5368	7503.19	7261.85	7900.57	7654.56	127.329	9019.26	9241.41	18294.8	19042.9	193.429	47013.3	29163.5
7.32322	20616.4	10849	54486.3	18.4999	29973.7	17976.8	91498	2.96367	4564.75	3499.84	11967.6	4.7283	93.4387	94.381	93.5762	95.2683	9.73164	274.819	261.587	261.755	268.32	11.0547	150.578	154.136	155.242	162.122	20.0285	282.456	276.597	277.791	278.986	43.4102	2668.89	2704.13	2693.01	2544.9	69.2502	6916.86	6942.55	6610	6826	145.158	10178.8	9963.35	21362	20260.1	195.982	48668.9	29082.3
9.5682	26754.8	14683.2	70510.7	38.6182	62568.3	35693.6	191723	2.15803	3257.87	2653.86	9521.64	3.25618	64.5641	66.6607	64.2909	64.639	5.44892	140.544	150.601	147.226	143.961	11.4536	169.735	167.133	169.121	168.774	29.0701	387.621	411.876	390.553	406.081	46.5674	2872.15	2828.18	2872.67	2775.64	92.9399	9250.19	9271.24	9053.3	8818.45	124.103	8636.68	9089.5	18864.8	18034.4	180.093	42933.2	26190.2
15.3108	43181.5	23510.7	110894	18.6984	29011.2	17997.4	89579.9	2.9431	4847.17	3466.76	12680.3	4.69781	94.1042	93.2294	98.0045	96.1244	7.41109	198.93	196.963	202.914	196.694	16.746	233.457	228.298	245.523	240.944	24.7242	339.322	328.353	356.88	357.073	57.9119	3562.57	3356.52	3514.93	3524.49	95.5141	9166.81	9023.62	9333.44	9492.96	112.425	8174.07	8078.63	17121.6	16350.4	181.665	46373.2	27892.3
13.6195	36784.7	20468.8	101136	30.2326	49941.7	27108.4	150767	2.56183	4198.22	2923.71	10492.1	1.24406	26.0607	25.2116	25.702	25.4644	6.80448	178.926	190.18	176.576	186.513	15.0424	218.029	213.001	215.152	208.629	29.7456	417.748	400.747	407.95	399.815	43.0321	2533.46	2537.01	2632.89	2635	61.9408	5881.17	5942.22	6029.27	5927.34	144.915	10966.9	10041	22096.1	21212	151.026	38823.1	22138.7
10.1168	28728.9	14443.2	74319.4	32.8405	55006.1	29742.4	159108	2.49523	4107.17	3019.51	10331.9	4.76437	93.8281	95.8433	96.303	101.236	5.16054	144.585	134.575	144.954	142.77	17.0778	232.482	238.687	253.371	230.5	28.1321	395.747	386.971	382.847	405.666	39.6309	2414.26	2257.22	2450.66	2251.33	95.0455	9379.68	9444.97	8986.58	9316.55	123.796	9292.42	8570.13	18556.9	18883.6	190.736	45304.9	28908.4
12.2854	35352.8	18648.9	90985.9	16.3257	25939.2	14669.2	77693.3	2.55935	4214.43	3130.81	10528.7	2.41373	48.4643	50.7167	51.8431	50.8388	6.53062	184.516	167.911	169.958	172.017	11.3044	160.792	161.627	152.965	167.299	25.9511	351.483	360.578	341.558	354.681	38.7159	2302.94	2251.97	2303.89	2216.36	90.4125	8627.8	8560.11	8496.28	8564.61	100.964	7160.68	6893.2	14227.7	14141.9	168.541	40309.6	24375.2
14.0484	40693.4	20502.4	106394	25.0246	41765.8	24134.2	123866	2.48105	3934.17	2783.84	10152.5	3.82764	79.9891	76.0245	81.0279	77.314	8.39628	234.677	228.334	227.062	230.266	13.721	202.492	185.242	202.434	190.391	26.6201	373.188	374.903	350.229	353.098	42.4313	2536.12	2624.14	2636.7	2411.87	74.0554	7034.81	7461.99	7251.86	7540.06	124.417	9097.8	8466.25	18685.1	17435.5	162.312	38799.2	22856.9
18.7174	54505.7	27803.5	144992	15.7761	25269.7	15282.8	76725.3	2.77318	4387.7	3320.22	11640.7	3.60152	73.8108	71.1229	76.1114	73.1315	9.96149	259.638	276.022	278.88	261.963	14.991	212.148	209.579	211.122	216.462	29.6922	419.327	407.976	425.514	399.558	57.7092	3615.94	3416.71	3402.15	3478.45	69.1674	6776.63	6837.5	7144.87	7147.97	134.611	10151.8	9547.89	19583.7	20327	180.51	46374.6	27182.4
12.1395	34751.3	18156.2	92967.5	24.3986	40302.2	24122.8	124362	2.29659	3686.62	2820.41	9714.13	3.37645	70.6051	70.452	69.4254	70.7769	7.54179	198.671	212.84	201.875	201.527	19.4209	267.358	276.951	263.737	267.569	29.9405	422.335	396.947	421.411	418.602	46.3408	2878.15	2858.96	2837.43	2747.93	90.6361	8861.66	8733.34	9148.27	9169.25	149.103	10816.9	10364.5	22751.5	20797.1	176.332	43089.1	26151.7
16.7679	46055.5	24605.5	131939	23.1671	35281	21530.4	117517	2.58176	4201.7	3046.13	11433.2	3.49857	72.4426	70.776	75.2126	69.0877	6.08978	163.97	168.173	156.257	160.866	11.3743	156.267	160.695	159.911	161.22	27.6523	366.831	380.633	371.382	362.625	45.0859	2739.92	2724.88	2796.49	2618.41	70.5394	6662.01	6834.82	6665.83	6921.43	144.84	10976.5	10235.5	22172	21994.9	159.764	38399.8	23414.8
5.18433	14047.8	7708.6	37612.5	19.5457	30695	19054	93938.6	2.5603	4134.85	2955.65	11254.7	4.44796	87.504	88.639	93.0149	90.9376	9.33308	254.283	256.691	259.187	239.123	18.4348	265.36	259.496	264.25	249.405	24.8705	349.24	347.576	336.986	356.81	55.4673	3283.47	3475.89	3413.94	3430.2	69.3328	6784.32	6565.87	7104.35	6880.46	121.192	8997.6	8191.33	17664.1	17800.6	186.118	48266.9	26272.3
5.90934	15962.4	8359.33	43801.1	12.5105	19143.8	11332.1	62359.7	2.30979	3720.4	2757.07	9760.68	3.89205	78.7421	83.5667	79.9249	83.0775	5.32515	143.546	142.108	150.139	142.986	19.2415	274.643	261.369	270.702	270.823	21.6385	306.696	311.622	297.337	303.48	55.5439	3172.74	3368.28	3195.41	3369.58	71.9516	7209.09	7229.6	6961.92	7034.2	100.478	7187.76	6813.03	14078	14377.1	167.941	43279.9	23347.3
14.5463	41583.5	22360.1	107053	21.2643	35276.3	19700.4	104454	2.02979	3067.57	2363.37	8484.57	3.75513	76.3889	73.1701	79.3472	79.8176	7.58388	212.636	204.351	210.164	205.872	10.0382	144.882	142.189	147.296	142.278	28.876	406.863	417.507	389.058	394.03	31.5101	1916.72	1834.5	1870.07	1879.68	85.0278	8214.98	8625.22	8492.32	8427.35	121.182	8804.54	8785.26	17731.9	17153.3	196.121	49785.6	28109.3
12.2656	34653.2	18306.2	89499.1	9.64592	15405.5	8763.89	48719.9	2.05667	3246.7	2314.9	8587.18	2.62731	53.2978	53.8873	54.2803	54.5133	5.30841	148.481	144.661	143.122	135.809	13.9543	189.734	189.534	200.644	199.854	22.1906	306.851	304.934	296.795	311.588	46.4047	2871.94	2750.42	2728	2644.16	61.421	5941.66	6073.28	6054.64	6278.23	102.007	7529.36	6907.6	15148.9	14346.4	198.261	48099	28893.3
16.8535	46182.5	25101.1	124888	35.3667	54477.1	34872.1	168703	2.25157	3478.39	2587.56	9650.13	2.77348	54.1893	55.5403	57.1248	54.2846	9.17938	246.174	256.91	256.341	255.812	12.211	178.645	179.446	168.661	172.624	22.8601	321.162	310.069	309.494	320.986	37.1433	2303.57	2276.22	2323.12	2223.53	95.1795	8934.65	9433.71	9743.33	9014.26	147.277	10221.1	10076.1	21444.4	20551.1	164.152	41195.6	23185.2
9.54603	25877.1	13357.4	71658	14.9246	23119.1	13499.4	73362.6	2.71174	4387.61	3308.05	11211.7	3.11868	61.0807	64.5905	63.7069	66.3049	7.61687	209.586	211.085	208.309	210.727	11.6356	169.017	169.402	166.088	170.866	25.1027	352.554	330.812	361.51	341.59	42.2403	2447.8	2532.52	2643.72	2527.06	86.135	8808.66	8761.66	8470.25	8570.02	133.066	9569.44	9242.36	18820.1	18728.1	184.502	47981.1	27157.4
9.05675	25985.1	12917.8	71150.8	12.1207	20273.7	11464	57261.8	2.73285	4200.16	3287.68	11558.5	1.68873	33.1679	34.9409	35.4703	34.5033	8.12098	227.927	217.304	219.41	215.192	15.8747	226.81	226.567	222.786	226.136	26.7321	354.814	374.403	367.257	360.668	42.3995	2620.33	2411.09	2555.35	2542.45	74.1183	7264.92	7676.7	7299.85	7648.48	148.778	10900.2	10450.7	22222.3	21790	169.217	42701.4	25765.1
12.0195	32832	16794.4	88266.7	25.3787	41574.8	23219.2	124950	2.56811	4213.75	3153.03	11238.9	3.12642	63.1034	65.2123	65.9829	60.8867	7.41625	199.549	207.783	205.553	196.525	18.2639	271.148	256.653	250.681	245.825	21.9287	297.65	288.593	287.072	291.232	58.7794	3528.06	3626.45	3525.14	3539.17	65.1038	6742.41	6208.57	6450.86	6418.51	114.879	8776.5	8319.85	16958.8	16621.4	189.626	47359.8	26516.8
8.39972	23327.5	12795.8	63569.1	15.8242	25270	14344.5	79353.5	2.65827	4119.94	3258.82	11443.8	2.21081	47.2938	47.444	47.0455	45.8344	6.73227	188.236	188.098	187.591	186.634	13.7681	199.938	190.352	195.155	199.305	25.4646	350.249	365.816	353.457	359.189	49.7734	2978.65	2976.18	2872.57	3035.68	72.1719	6836.5	7086.74	7028.56	6853.89	111.524	7922.56	8136.1	16760.8	16759	153.279	37830.7	21615.9
7.86691	22634.6	10999	56685.7	32.1673	50475.3	31125.2	150725	2.61581	4110.27	3076.2	11391.4	3.62625	73.753	73.5811	75.9022	75.9687	5.98737	156.959	168.144	160.346	161.923	14.3687	208.64	204.938	211.04	198.548	20.9549	284.67	277.235	290.561	299.28	30.2995	1886.64	1818.91	1847.75	1834.3	62.8007	6045.82	5947.66	6198.56	6328.01	123.125	9239.61	8707.61	17726.2	18378.8	181.014	42800.3	25785.3
17.2605	47643.9	24204	135195	10.9379	18344.2	9899.15	52654.6	2.54725	4226.74	2929.95	10673.5	2.78812	55.3716	59.7222	54.7912	55.6173	7.04644	185.993	194.029	190.357	194.295	13.2657	193.893	188.336	192.088	188.757	26.1366	375.606	377.66	357.404	369.359	42.3183	2448.95	2651.01	2506.31	2514.11	92.5666	9404.78	9266.43	9025.44	8989.92	128.762	9077.16	9170.45	19478.3	18124.4	173.866	42081.6	25391.1
18.0202	51009.1	27019.1	141558	24.9737	41366.8	24363.7	127067	2.63411	4198.37	3105.21	10911.6	3.94979	77.169	83.0931	80.9798	77.783	9.49987	247.576	259.517	246.903	244.822	19.6254	266.745	289.958	270.042	265.091	23.7048	332.43	324.862	332.219	328.317	54.7694	3214.12	3329.35	3420.54	3244.79	72.2494	7122.47	7024.24	6883.35	7210.88	143.191	10231.1	10531.1	21319.7	20034.1	196.859	48893	27541.5
17.4698	49858.6	24491.6	128374	16.3331	27382	15201.6	83075.3	2.91731	4405.55	3463.89	12143.9	4.14942	88.7657	86.8455	83.5745	87.1234	7.34466	193.834	197.934	190.981	199.32	16.9701	233.876	237.063	229.161	240.321	29.2812	404.288	387.007	403.33	393.35	58.14	3576.3	3467.39	3587.38	3593.85	71.3371	7080.27	7101.76	7164.54	7383.26	104.222	7837.99	7315.92	15474.4	15992.6	158.9	40278.7	22351.2
16.3605	46051.7	22818.5	124226	13.4955	21360.9	13328.5	65011.8	2.97438	4761.22	3424.7	12323.1	2.43061	50.7343	51.7486	50.9531	48.5375	5.51936	146.751	144.851	149.498	154.488	17.9666	258.033	253.951	260.162	258.219	29.3854	414.79	395.338	395.364	395.268	51.6194	3101.94	3112.47	3210.52	3093.79	68.6653	7025.66	6648.71	7094.03	6651.69	147.184	11057	10735.1	21211.7	22093.1	191.485	45812.1	28537.2
11.8458	33083.8	18002.9	84779.3	32.2707	52700.6	29053.3	166117	2.59236	4311.84	3094.54	10545.7	3.46364	69.2888	72.6108	71.8769	70.9377	6.94468	186.279	193.372	180.183	180.367	18.6114	271.935	258.607	275.379	274.757	27.9202	381.015	365.566	369.33	382.806	58.1739	3327.52	3601.36	3606.41	3445.54	78.3026	7620.32	8110.74	7787.81	8048.53	120.425	8782.09	8727.57	18125.9	18088.2	186.11	45125.9	26485.9
8.63073	24207.8	12360.7	65094.6	27.896	44499.8	27166.5	140475	2.03008	3187.31	2362.13	8474.05	2.93352	57.1172	62.4273	59.4663	59.7609	7.43828	205.612	204.913	190.29	209.978	15.0845	206.688	213.985	221.827	218.159	22.9568	305.858	330.237	304.37	323.098	30.2016	1813.5	1877.44	1761.57	1837.84	82.7394	8450.04	8078.65	8467.09	8379.03	136.671	10283.6	9905.34	19167.9	20434.4	167.168	43470.2	23781.5
15.2321	44280.6	21912.1	114079	37.2914	58722.8	34531	191443	2.50887	4060.76	3070.45	11055.2	2.94941	59.2477	58.5869	61.4914	62.1329	7.59561	204.449	203.505	196.831	214.42	19.8965	291.813	280.959	293.43	276.973	28.6946	403.222	405.073	404.011	408.057	44.371	2696.71	2531.64	2698.68	2686.23	68.2331	6938.17	7039.03	6966.57	6428.72	124.246	8948.29	8429.78	19019.2	18830	198.529	46975.5	29431.9
8.90341	24218.1	13346.7	66140.6	27.7743	46064.8	25016.1	135167	2.33955	3842.6	2672.56	10280.9	3.66004	71.6618	72.1939	77.0349	73.6877	9.8574	265.983	262.96	260.522	258.038	14.4172	206.5	211.864	206.686	200.626	25.8664	343.537	353.388	350.919	363.268	47.1825	2937.99	2953.85	2804.2	2799.41	90.0808	8716.58	8534.14	9309.14	8949.66	132.935	10010.6	9344.11	19053.3	20000.5	180.045	43808	27586.8
9.8464	28555.3	15114.2	77627.1	9.28599	14520.7	8811.78	45806.4	2.31833	3784.59	2810.01	9309.48	2.95567	61.7388	59.6662	63.2241	63.2247	5.99548	158.869	160.07	165.659	157.144	17.5446	254.451	236.52	247.336	238.882	22.5359	302.563	322.094	315.341	304.848	44.3538	2704.65	2762.45	2573.88	2530.2	64.478	6133.04	6644.5	6379.08	6195.82	132.657	9664.93	9092.33	18600.3	20306.6	163.915	41095.3	23095.8
9.41698	26653.2	13864.2	68678.7	25.3067	42116.6	23258.1	128420	2.48141	4081.58	2979.46	10218.9	2.20601	45.443	44.5041	45.0601	43.0903	7.31585	192.352	193.479	199.38	205.508	13.88	187.576	188.582	195.981	197.088	22.7738	326.116	312.051	312.731	321.117	47.1909	2933.02	2871.27	2892.71	2862.34	66.312	6678.26	6657.84	6446.05	6484.09	109.066	7567.99	7490.77	16183.4	15906.2	180.652	44466.8	26658.4
18.259	51078.6	25465.6	144222	11.0681	17558.9	9963.36	54333.8	2.70612	4255.71	3288.88	11977.8	2.60036	53.9099	54.9675	54.4419	55.0719	5.12473	139.032	136.204	139.671	138.668	17.1402	247.578	254.389	243.788	251.251	22.9921	329.119	307.211	303.295	324.83	30.2107	1798.86	1745.16	1829.74	1882.04	83.5452	8003.82	8462.29	8049.48	8415.71	145.139	10342.7	10316.7	20571.1	22021.5	180.47	45915.3	26163.8
5.24121	14744.5	7591.97	37535	39.8992	62544.4	37891.7	200790	2.22552	3695.88	2666.89	9851.37	2.65497	55.4363	55.7256	52.8132	57.0343	6.8107	188.787	174.703	178.13	184.931	18.0863	249.743	245.206	267.16	249.566	26.9446	365.36	372.922	370.335	353.954	30.9187	1871.42	1792.07	1910.47	1919.66	72.8463	7310.27	7531.52	7481.98	6944.24	130.539	9603.08	9512.51	20015.7	18169.2	154.63	37362.5	21898
18.134	52697.1	25706.2	130697	39.6496	64124	38055.1	201871	2.47735	4074.83	2859.39	10292.2	4.81467	101.183	96.6431	99.2576	94.0198	5.25889	139.968	146.889	135.078	134.499	18.3195	262.351	265.267	255.068	260.964	26.3711	345.973	376.886	365.304	362.969	48.5644	2808.18	2903.55	2973.87	2837.18	82.2712	7778.75	8517.2	8086.09	7956.89	145.72	10399.8	10333.1	20805.7	21318.9	156.19	37384.7	22375.2
19.0889	54908.7	26736.6	142834	23.0646	36343	22249.9	115633	2.79372	4617.33	3298.9	12238.4	4.23797	86.5914	91.0867	89.3243	82.767	7.7598	211.21	216.266	201.633	198.568	10.6494	149.406	150.522	148.362	144.04	22.2568	302.316	318.978	304.485	319.342	48.4856	2969.97	2873.26	2902.94	2900.64	98.2135	9844.97	9675.33	9303.17	9590.72	129.554	9557.88	9393.17	18133.8	18803.7	175.358	41428.4	26402.4
16.7468	48090	24739.4	127661	18.2525	28180.7	17354.1	88419.1	2.81081	4516.68	3453.87	12161.1	1.7562	37.3856	35.0863	36.8147	34.426	9.26503	250.69	256.547	243.332	248.553	15.8001	228.059	230.181	230.68	214.892	20.8688	279.031	299.145	291.657	275.81	30.3262	1897.68	1762.1	1818.83	1743.89	88.7017	8336.87	8551.12	8479.14	9150.64	141.326	9881.41	9706.75	21227.7	20064.4	182.106	44279.2	27927.8
9.81481	28214.8	13831.1	76958.7	34.9064	56381.7	31824.8	167909	2.4697	4051.74	2848.7	10223	1.48194	29.1083	29.248	30.527	30.4717	5.75398	148.977	160.865	148.643	154.209	17.5065	236.216	254.515	246.406	255.572	25.7969	339.401	346.139	346.983	366.589	41.3022	2589.04	2584.31	2399.98	2559.26	86.8703	8774.87	8564.37	8678.04	8739.96	128.948	9197.59	9011.7	18219.7	17935.6	176.696	42979.3	26571.6
14.8352	43361.9	21326.4	107417	34.0915	52652.4	31103.9	162012	2.04351	3289.58	2492.02	8401.03	1.02406	20.7261	21.1746	21.5966	20.6416	5.20272	136.889	138.85	135.723	145.55	13.3993	188.591	189.833	192.488	184.313	28.4612	400.62	396.507	410.539	373.963	35.6778	2036.76	2143.36	2206.13	2129.81	75.3791	7220.28	7089.74	7135.49	7788.56	114.771	8659.91	8247.75	17038.6	17429.5	151.282	38573.7	22453.1
10.3932	29218.9	15128.9	81781.5	25.7572	42838	23692.4	126186	2.54165	3836.67	3011.22	10824.8	1.99846	42.9203	40.8197	42.9095	41.7875	9.12442	248.558	257.134	254.726	237.223	17.6928	259.245	251.592	238.072	253.949	26.4595	358.108	377.884	349.796	362.741	40.2443	2319.14	2387.03	2517.83	2486.9	87.7701	8441.47	8820.06	8555.94	8285.63	124.144	8916.91	8383.45	17728.9	17514	155.768	37090.6	21703.9
16.3625	47578	23566.5	127183	21.0315	34242.6	20399.1	100411	2.23121	3414.38	2561.32	9684.86	1.44536	29.6216	29.8002	30.1472	29.843	5.21386	137.525	133.782	133.288	139.962	11.6166	164.768	161.009	158.643	156.718	28.9497	388.763	407.806	381.655	381.851	46.5416	2688.92	2780.43	2782.37	2749.59	90.5266	9192.42	9043.9	8532	8579.3	106.101	7605.5	7351.28	15300.2	15588.9	159.502	39169.1	24306.9
8.22368	23121.9	12634.6	62175.2	18.6964	31198.3	18179.6	92630.9	2.88363	4718.38	3499.1	11706	4.5988	90.0732	96.6106	98.2047	94.9085	9.78704	272.28	250.217	273.968	264.17	10.9603	149.587	147.608	152.183	160.453	20.8835	285.426	281.681	281.551	288.582	44.6466	2782.04	2720.49	2721.42	2760.58	80.1519	7821.21	8044.68	7604.05	7698.08	102.079	7142.43	7077.78	14446.7	15428.6	194.953	49012.2	29882.4
17.5185	47280.8	26112.6	131858	12.1778	20157.8	12026.3	57514.3	2.35332	3567.91	2627.4	10194.8	4.82074	101.416	95.8472	97.6556	103.106	9.51085	253.369	260.449	263.37	254.396	11.1246	154.19	164.533	163.625	150.175	26.0468	371.178	341.98	363.979	368.4	40.4719	2391.94	2388.8	2489.27	2498.97	78.5348	8068.71	7761.42	7664.27	7923.51	131.442	9733.79	8906.21	18493.1	18839.2	187.584	48728.8	26516.7
17.2472	49614	26506.3	133572	39.3011	65793.8	37883.4	185714	2.51789	3937.72	2846.53	10508.3	3.87532	79.234	75.8648	79.8693	76.1045	6.31909	163.517	164.866	165.341	162.92	12.8938	185.513	183.085	173.392	182.368	24.8285	336.655	345.094	353.474	336.057	47.1287	2740.65	2790.68	2872.05	2900.7	76.4363	7413.3	7648.06	7873.68	7430.58	126.268	9229.29	8817.95	18319.4	17987.6	163.5	41847.6	23454.5
7.44193	20311.8	10785.8	55051.9	16.3359	25982.2	16141.1	76313.1	2.30684	3499.69	2755.33	9521.28	2.35971	47.3564	46.2034	46.4036	46.3019	9.78177	255.539	256.291	256.871	263.447	11.3229	157.211	156.332	158.127	165.743	23.8225	338.476	317.829	329.136	316.754	40.9329	2368.94	2465.32	2537.04	2375.77	89.4054	9084.38	9254.91	8581.29	8680.48	114.463	8454.32	8203.35	17024.2	16659	190.252	46809.2	27987.7
14.131	37840.9	19985.5	101212	18.1872	28303	17458.4	85299.8	2.76317	4188.46	3124.61	12187.2	4.94314	103.034	101.991	97.6635	104.8	5.92635	152.468	156.077	158.333	162.21	18.032	266.135	253.69	266.343	252.798	22.9119	323.89	323.962	311.443	317.861	36.8949	2257.79	2184.95	2206.52	2171.1	61.9453	5887.17	5865.45	5851.18	6063.97	132.456	9887.87	9686.36	19116.2	20137.8	199.221	47401.2	29019.9
17.3885	46875.5	25933.6	137433	11.5516	18889	10741.7	54893.4	2.79552	4596.18	3420.66	11433.7	1.06218	20.9089	21.2817	22.4017	22.8339	8.81236	235.131	234.488	226.92	245.399	16.0507	224.997	235.818	238.042	230.058	24.1415	328.908	335.143	346.082	339.158	40.9302	2556.93	2351.24	2432.14	2432.63	63.1285	6113.69	6344.82	6291.13	5963.43	143.751	10905.5	9857.62	22016.3	21809.4	160.722	39513.1	22668.5
5.33062	14581.6	7709.32	38446.7	12.9275	21299.7	12010.6	66031.5	2.04468	3305.09	2359.91	8852.43	3.0917	62.4911	61.8667	61.0739	63.6482	7.92725	218.156	215.872	216.765	211.77	18.829	277.846	254.258	264.628	278.61	22.8065	312.589	322.033	306.901	324.005	52.3703	3139.18	3215.21	3146.99	3030.91	95.1697	9574.66	9710.41	9507.14	9201.44	142.763	10497.1	9957.62	21437.8	20236	152.705	39562.2	22781
6.08495	17857.1	9143.57	44276.2	31.5136	52801.4	29638.4	149303	2.94682	4894.37	3461.91	12600.2	4.77709	99.8681	95.4476	102.068	95.5509	6.88206	188.021	189.309	186.816	190.655	14.9859	221.397	220.521	213.672	215.282	29.0056	409.431	389.092	415.693	409.133	45.4816	2603.34	2618.18	2621.32	2589.99	84.9396	8613.69	8798.97	8177.6	8131.59	100.317	7413.97	7240.02	14573.9	14587.6	194.582	49234.8	27561.6
9.81758	27045.2	15062.4	73852.2	35.6192	55507.6	35076.1	175386	2.41264	3657.64	2772.53	10103.1	4.41893	86.5419	92.3961	94.0748	88.9571	6.59128	174.383	180.196	171.952	176.578	11.8962	175.625	174.262	167.518	166.825	27.0883	386.031	388.526	378.011	376.632	30.1266	1727.44	1863.58	1796.19	1717.69	68.2227	6604.28	6499.51	6656.17	6424.46	136.481	10057.6	10025.7	20041.8	20798.6	188.181	46198.9	26509.2
16.6727	44860.5	24093	122765	34.3717	55460	31616.6	163287	2.03081	3153.98	2322.28	8348.48	3.98935	83.8752	84.8201	79.884	78.205	6.18611	173.343	159.707	166.264	172.957	18.9199	267.42	266.124	270.431	262.934	25.2219	339.928	358.374	364.275	357.208	44.2135	2619.85	2724.76	2623.99	2617.73	77.2466	7627.94	7896.18	7289.36	7365.87	111.785	7928.38	7488.88	15898.8	16147.8	191.322	47635	26672
9.30455	26434.5	14303.3	70855.3	34.9309	53771.4	32876.5	176463	2.18093	3345.84	2465.29	9056.85	1.16952	24.4968	22.9572	24.3785	25.0265	7.22593	194.412	187.334	188.895	203.314	15.6123	228.321	216.664	231.282	228.96	29.0839	412.446	383.598	398.507	399.439	41.4247	2437.63	2495.99	2498.48	2499.01	63.6717	6506.46	6340.46	6128.43	6138.41	117.205	8663.46	8524.41	17238.3	17762.8	188.285	46443.7	27010.7
5.8412	16548.2	8640.07	44736.5	27.2409	42329.2	26713.6	137934	2.91957	4422.48	3336.76	12716.2	1.08594	21.3168	23.2234	21.6051	23.0826	5.04336	134.884	134.04	136.118	129.198	10.4228	143.328	147.088	153.125	142.652	20.9293	277.16	296.826	291.634	299.396	49.5193	2838.69	3103.38	2979.87	3072.16	64.2487	6427.44	6222.75	6335.53	6480.01	148.542	10603.9	10156.8	21184.6	21800.2	175.721	44758.2	25022.9
12.0633	35057.5	17256.5	90683.8	31.1477	51473	30137.5	155827	2.83684	4664.15	3233.25	11696.6	2.81883	59.4332	59.3608	57.7679	58.435	8.44215	229.482	235.449	228.235	228.35	14.6623	202.471	215.055	199.448	212.738	29.7807	427.94	429.503	393.886	421.375	31.7235	1923.08	1963.51	1963.51	1979.36	96.134	9341.08	9462.48	9494.83	9401.23	120.251	9084.91	8083.83	18370.6	17322.2	182.026	45590.5	26719.5
19.4519	55315.9	28609.4	151171	25.3192	41354.5	24930.1	129180	2.50905	4107.73	2999.77	10656.8	2.53836	50.2191	50.5787	50.3676	52.4603	6.17277	165.858	163.824	161.806	171.08	16.5974	228.654	243.983	231.196	225.503	20.5074	289.553	274.054	290.564	274.771	57.5419	3336.64	3516.28	3362.45	3433.6	82.459	8159.76	8050.28	7838.98	7992.1	142.164	10015.6	10159.7	19864.7	20707.5	181.56	43301.4	27128.5
18.3087	51794.5	28188.9	137060	19.5772	31381.8	18742.5	98663.4	2.94872	4870.81	3459.51	11913.5	2.91279	62.5998	58.016	60.9297	57.1392	9.8999	261.741	267.692	265.199	276.142	12.7215	171.876	172.435	182.809	177.184	25.1817	342.596	359.808	337.365	356.676	56.107	3507.1	3207.75	3343.23	3289.77	78.5724	7652.09	7567.61	8122.73	7978.75	105.799	7923.9	7113.04	14983.3	15906	198.816	50809.6	29267.3
7.55619	20207.3	11182.9	57431.9	18.5707	28629.8	18042.2	91284.4	2.14272	3270.72	2567.89	9312.61	2.35827	48.1314	49.6055	46.4072	49.549	6.06338	170.039	161.685	162.556	168.24	19.3428	266.347	267.793	274.332	276.618	25.3505	360.978	339.026	339.137	341.269	51.7627	3182.26	2953.71	3046.93	2964.47	87.662	8662.67	9070.9	8808.83	8895.85	129.54	9902.71	9016.2	18287.5	18376.8	154.424	38040	23549.1
10.5059	28580.6	15072.8	75339.9	31.9584	52501.9	30958.5	160223	2.06605	3222.75	2542.61	8412.78	1.33702	26.3302	27.0088	26.0588	27.6307	7.31698	188.117	205.103	201.777	192.562	14.4963	210.2	212.126	210.345	204.326	24.3115	336.47	321.461	327.672	338.404	47.1213	2955.8	2813.36	2708.01	2908.47	96.9501	9383.3	9580.13	9986.26	10042.8	132.793	9694.2	9456.79	19339.9	19630.9	168.429	40867.9	24739.1
19.1238	52843.2	27055.1	146896	18.7781	30237.6	17721.2	91928	2.37946	3675.37	2903.33	10109.5	4.83191	100.476	97.3607	100.511	99.3872	7.12075	188.142	188.645	191.573	183.112	19.68	271.749	276.697	273.414	281.487	29.2504	388.674	408.921	393.822	407.431	35.1078	2044.17	2138.06	2202.83	2020.91	86.2348	8137.08	8937.85	8937.55	8344.94	108.419	8185.49	7710.99	15391	15377.5	151.999	38194.7	22579.3
14.9704	40867.1	22166.2	117547	22.9375	36514.9	20813.2	116988	2.22403	3621.49	2735.03	9354.51	2.18988	43.4794	42.7752	46.7831	45.5983	9.68508	266.769	271.562	265.399	260.379	14.9713	210.196	204.79	210.446	210.649	29.5711	400.568	397.122	401.353	415.317	40.6715	2403.33	2514.79	2461.7	2380.28	64.2879	6059.89	6618.23	6256.92	6376.62	134.228	9376.51	9248.44	18897	20225	195.193	49180.4	29196.9
14.6693	42057.7	20859.2	105715	35.6215	56464.5	33161.5	166552	2.89343	4754.71	3284.07	12511.4	4.05713	79.2526	87.0205	84.8138	86.9257	5.9692	166.565	153.561	165.573	162.968	13.1301	191.131	182.893	177.044	185.228	26.5402	373.509	356.112	351.742	375.856	40.2951	2435.02	2462.11	2499.52	2304.2	83.5944	8411.49	8333.37	7931.76	8109.95	104.735	7294.99	7654.38	15766.6	15102.7	156.454	37768.4	23946.3
14.5568	42122.5	20454.6	107512	23.7335	39424.6	22245.5	117717	2.3046	3830.03	2782.54	9664.39	2.00861	41.9191	41.0113	42.7771	40.5623	6.40995	180.961	171.636	178.222	173.541	14.2915	199.138	208.7	206.981	210.088	28.3318	400.298	391.077	392.536	379.921	58.9033	3511.83	3597.24	3351.03	3538.21	91.4212	9090.62	9198.77	8785.18	9075.87	124.234	9441.72	8661.38	18746.9	17976.7	182.366	47006.6	26276.9
10.1051	28171.8	14719.1	74002.4	26.3343	42820.7	25782.1	123266	2.64702	4348.94	3062.45	11004	4.09538	82.4005	83.4592	83.8872	86.7412	8.16525	223.593	209.788	213.564	224.283	19.1898	272.86	265.414	272.646	261.215	20.9077	285.165	279.551	293.912	302.05	45.1364	2690.59	2682.46	2755.81	2748.43	63.7911	6519.64	6148.1	6000.45	6135.15	132.522	10124.7	9334.1	19262	20203.3	195.133	46086.1	28746.8
8.12868	22775.2	11365.8	61730.7	10.4269	15915	9827.41	49980.6	2.77613	4419.72	3300.11	11972.1	4.1956	88.34	86.2461	89.1334	84.0628	6.14239	159.411	158.083	158.704	159.704	17.6838	261.578	247.356	248.89	246.885	21.9754	299.069	290.786	303.25	298.567	40.7031	2432.94	2473.85	2492.11	2457.17	77.6435	7587.36	7664.63	7718.06	7681.79	124.47	9234.7	8548.04	19008.7	18503	164.698	41677	23348.7
10.0679	27010.2	14373.4	72832.4	38.0933	63711.3	34494.1	185232	2.47129	4047.57	2888.93	10450.3	2.74881	54.5972	54.3454	58.8961	56.9733	9.43378	253.054	257.939	266.307	260.528	15.076	217.099	212.503	212.921	214.919	24.257	328.715	322.823	328.194	342.892	49.0444	3069.71	2931.08	2916.07	2960.37	85.0774	8809.58	8216.7	8621.65	8043.75	121.793	8496.94	8413.63	17217.3	17680.4	181.623	43773.2	25894.9
16.5992	45778.7	23813.7	121785	32.5521	52979.2	31208	161563	2.46496	3778.64	2894.9	10126.1	2.69394	55.4233	54.0617	55.1625	54.6772	5.7011	146.733	158.598	154.571	149.82	12.9375	178.708	177.96	191.268	179.485	25.5753	341.106	356.944	342.617	338.316	47.6188	2930.43	2903.64	2716.23	2971.29	61.6852	5814.52	6002.57	6240.09	6189.55	144.908	10807.6	10357.2	20255.3	20673.4	198.246	50781.2	29142.2
9.97414	29302.9	14792.1	72053	28.7642	46074.2	26294.5	140949	2.08587	3284.51	2554.49	9144.42	1.31875	27.5975	26.6979	25.6796	28.108	8.61064	225.862	229.053	234.908	237.426	18.4094	261.301	251.509	248.491	252.691	26.6882	371.575	355.116	366.815	354.815	52.2329	3122.76	3128.09	3143.39	3271.87	80.5205	7790.7	8165.49	7719.81	8139.57	121.393	8843.33	8747.79	17047.2	16892.2	172.721	44400.2	26206.5
6.45182	18687	9066.11	46912.8	22.976	35398.3	21156.2	115346	2.25669	3580.27	2666.19	9575.81	2.61235	50.8695	50.8628	53.091	53.7926	7.54471	193.005	196.429	211.758	198.448	16.6262	240.546	246.808	232.824	242.232	27.1135	378.955	366.034	372.119	372.616	47.5115	2744.38	2960.98	2792.4	2707.67	97.7008	9755.59	9192.27	9359.33	9876.09	113.989	8375.06	8375.69	16443.4	17300.1	161.163	38325.9	24235.2
16.0959	43244.5	23222.9	123573	18.1181	28208	16747.8	85900.7	2.70655	4228.8	3103.92	11226.3	3.60273	72.9707	76.7831	76.25	71.2946	6.33388	169.737	171.532	177.543	163.69	19.3768	276.501	287.043	285.36	265.15	20.0542	264.172	286.803	270.544	274.711	51.4865	3185.2	3171.99	3054.48	3059.19	64.6619	6264.32	6325.98	6140.17	6588.22	114.304	8227.16	7634.35	16653.2	16729.2	150.502	36161	21002.3
7.30629	21283.7	10635.7	53036.1	16.9586	26764.6	15920.4	85002.8	2.03101	3217.51	2419.23	8836.87	4.18092	89.7953	88.1431	84.8604	88.0733	5.13855	132.317	139.547	144.87	135.667	19.1651	258.632	277.872	268.432	260.368	21.4849	304.195	296.779	282.91	301.434	50.5258	2974.97	3091.42	2906.74	2878.78	99.6493	9484.89	9811.7	9634.16	9761.38	103.921	7206.58	7094.19	14774.9	15911.5	163.705	41914.7	22943.8
17.2636	48940.2	26383.6	134662	24.0842	38720.2	22273.8	112854	2.40843	3955.62	2709.3	10563.9	1.78483	36.4775	36.8187	35.2096	35.8615	9.67701	270.733	263.145	251.416	259.765	19.1487	265.376	265.842	268.97	280.314	29.1841	420.846	389.576	422.204	413.597	40.0124	2385.99	2480.83	2454.24	2370.7	82.0264	8052.04	7856.73	8359.55	8213.95	135.149	10197	9072.54	20369.1	19736.1	183.834	43367.8	27175.5
12.4928	35384.7	17901.8	97695	17.4518	28600.2	16206.7	84169.3	2.01739	3218.24	2356.6	8444.81	2.03867	41.3322	39.9606	43.4528	42.2925	6.03551	169.043	165.808	158.469	166.784	18.8067	268.878	265.12	262.161	269.968	29.9416	422.826	400.694	413.734	397.425	37.6097	2278.89	2307.17	2165.9	2229.27	87.0111	8524.07	8677.99	9017.47	8949.88	122.205	9003.06	8503.11	17603.9	17949.8	153.494	36614.2	22290.8
9.39167	25177	13588.7	69263.8	25.6449	41248.4	23191.4	125680	2.93533	4874.65	3405.82	12042.1	3.14727	64.2434	62.2885	61.5675	65.9867	7.18815	190.539	189.431	198.424	192.337	13.5114	187.269	181.94	198.543	189.389	24.9729	339.258	335.862	340.962	335.101	30.497	1827.28	1820.33	1901.88	1886.23	86.1775	8324.61	8389.53	8307.24	8584.02	113.091	7902.43	7558.14	15956	15997.6	164.306	41838.3	22886.5
16.765	48315.4	25807.5	125177	28.8754	44779.6	28158.9	142657	2.73675	4163.81	3209.61	11810.3	2.60537	53.233	51.8514	55.2704	54.3957	9.50009	257.435	247.762	266.642	260.077	14.5878	196.411	204.091	204.115	205.947	25.1586	351.845	348.384	330.632	355.196	43.3214	2528.39	2507.49	2558.04	2467.84	98.2906	9630.76	9803.61	9433.24	10039.7	124.837	9443.87	9182.98	18576.3	18132.2	186.823	44131.7	26433.4
6.30418	17019	9411.44	49832.1	14.4883	22075.3	13886.5	70409.7	2.09787	3431.5	2489.43	8996.71	1.88376	40.1054	39.3806	36.7833	39.2602	5.90459	165.713	156.402	159.45	156.443	11.2798	164.064	164.3	157.927	157.346	23.1159	314.642	306.955	310.109	326.554	34.8801	1987.62	2146.85	1999.75	2022.77	86.8845	9010.13	8978.23	8487.31	8686.9	128.164	9662.82	9231.54	19086.6	18433.4	163.278	39806	24226.1
15.8817	44652.4	23547.3	117931	11.1866	17226.2	10382.1	57100.6	2.05831	3280.07	2473.31	8813.65	3.54735	73.7365	74.0146	75.9923	70.5006	8.91118	241.145	234.283	229.214	247.022	13.5657	186.949	193.315	184.747	183.707	28.6892	382.044	381.105	407.288	382.058	52.0588	3145.63	2997.77	3135.71	3086.27	73.8541	7322.31	7607.57	7327.32	7656.81	124.651	8851.18	8385.3	18171.8	18934.7	176.602	42597.6	27095.7
7.57463	21128.8	10856	57461.9	23.3235	36758.2	21588.2	113322	2.56032	4190.33	3008.7	10354.8	4.85806	100.986	104.366	102.541	102.152	8.14156	211.801	208.937	220.048	215.441	14.8928	218.211	217.935	218.134	209.949	27.0002	388.248	357.487	388.023	361.755	51.3559	3018.42	3064.12	3168.25	3086.12	60.5535	6132.64	6143.7	5766.25	6263.81	115.726	8376.05	8422.17	16256	16975.4	169.268	44048.3	23608.3
18.2004	49658.1	25682.6	138221	17.5765	27414.3	16595.9	86913.7	2.24305	3418.08	2725.31	9890.3	3.30407	69.3904	65.1771	70.4806	69.3096	9.95648	279.915	264.237	270.87	259.022	16.3004	229.875	234.655	239.904	227.577	28.1614	405.777	405.12	401.403	399.185	38.9069	2431.94	2289.72	2250.48	2398.2	71.3203	7243.95	7222.75	7236.94	7285.85	106.384	7700.49	7275.54	15878	15209.2	163.732	39218.6	23125.3
14.0524	37597.5	20881.7	106430	37.8607	60433.7	34701.2	193948	2.10701	3507.19	2411.84	9149.38	3.0828	62.7342	66.139	63.0343	61.0993	8.39858	234.285	223.068	217.834	220.505	12.8244	185.669	179.453	176.067	189.834	25.6626	341.577	365.86	351.136	341.169	51.3772	3200.77	2999.74	3062.05	3065.81	99.1898	9938.67	9732.55	9753	9971.13	139.776	10385.3	9414.2	20428.4	21157.8	198.911	49686	28623.3
15.9754	45980.8	24525.5	121462	13.1696	22082.1	12753	63426.3	2.93105	4694.25	3380.19	12289.3	1.53612	32.829	31.7651	32.1599	31.7987	9.39729	261.245	243.177	259.335	248.504	11.5254	161.683	157.077	161.676	167.503	20.4195	289.057	285.742	276.676	294.353	32.7105	1875.82	1900.98	1917.51	1912.36	80.6579	7644.19	8024.71	7702.04	7998.8	142.019	10512.2	9498.75	21572.9	20904.2	177.62	43697.5	25062.2
7.63687	20777.1	11307.5	58398	10.7634	17330.9	10516.4	51769.6	2.90529	4421.99	3375.57	12212	3.69471	78.9708	75.1061	76.4889	74.2095	6.34521	169.026	173.024	174.23	174.029	13.2058	179.078	186.223	195.507	189.172	27.6042	368.641	390.96	370.976	383.662	59.7831	3714.94	3738.56	3545.53	3680.21	84.0242	7994.01	8152.24	8062.31	7916.74	142.301	10775.3	9591.18	21016.7	21820.9	151.854	39176.3	22791.4
11.2823	30859.3	15989.2	83536.8	33.8639	51716.1	32550.1	173196	2.9327	4491.3	3334.54	12540.4	2.96988	59.6427	62.3595	63.3047	58.4732	6.70363	178.335	183.305	180.585	184.96	18.6335	260.786	257.531	253.573	269.226	20.5277	278.212	273.98	271.347	288.559	50.9355	3181.34	3038.25	2917.37	3040.21	67.6008	6597.19	6781.52	6656.07	6572.3	107.177	7643.46	7567.16	15284.7	16316.1	181.909	47051.4	26497.4
17.6822	50968	24684.7	134743	23.918	37018.2	22750.4	114170	2.49294	3794.18	2847.23	10150	4.82687	102.4	103.493	103.266	103.523	9.42204	252.778	259.337	258.35	241.06	14.9964	210.167	204.373	214.252	206.469	22.0846	302.255	309.978	317.977	317.215	44.6157	2587.1	2719.04	2700.44	2715.9	95.1737	8961.15	9537.95	9664.87	9520.29	100.182	7557.01	6976.91	14618.6	15315.8	175.68	42155.6	26527.1
12.3028	32756.5	18161.4	95462	26.6257	42264.3	25741.3	127151	2.94589	4534.46	3379.64	12812.6	1.99611	42.6317	38.9669	42.8047	41.5387	8.72079	232.127	241.723	224.555	235.784	13.7517	199.48	194.086	194.761	195.204	28.7843	387.659	409.441	409.723	416.375	51.5231	3142.62	3060.86	3064.55	2990.78	93.3286	9447.79	9535.32	8957	9333.34	116.259	8199.86	8514.56	17380.3	16347.2	173.446	41151.4	25423.4
8.97863	26279.6	13711.5	68432.6	29.5244	47734.8	28443.7	149396	2.77081	4312.7	3176.86	11539.2	2.22916	44.6475	46.8612	45.8015	47.4427	8.9066	235.769	246.673	237.117	251.351	19.6206	287.539	271.07	285.263	275.078	23.8484	344.428	340.015	327.166	327.071	32.7991	2050.05	2053.85	1922	1874.69	95.6764	9898.58	9459.55	9508.99	9505.28	140.341	9718.15	9641.79	19616.9	21281.2	173.414	41390.8	25173.9
15.5549	42112.6	23554.5	118275	14.6375	23732.1	13419.7	72704.8	2.99678	4742.04	3396.21	12943.4	2.34431	46.1912	45.9866	46.7188	47.4064	6.29854	174.182	164.781	177.786	174.544	12.4747	184.066	185.033	185.076	179.451	23.6684	328.336	313.179	312.392	326.993	54.2438	3365.62	3215.31	3167.92	3291.13	86.5538	8137.16	8652.59	8400.63	8670.46	122.27	8798.91	8317.26	18504.9	18738.4	170.12	41188.4	24880.1
11.3152	31491.2	16753.8	84622.7	23.0017	38066.6	21380	112573	2.81773	4575.06	3264.88	11484.5	1.41224	27.6944	30.3036	27.8924	30.2994	5.5315	154.52	145.168	151.894	145.147	14.2291	202.558	198.199	197.397	209.989	22.8522	319.454	307.582	319.303	328.689	37.4313	2284.01	2224.67	2179.23	2186.63	83.6305	8341.93	8380.56	7862.51	7952.2	142.011	10398.8	9573.74	21517.5	21713.4	169.278	42746	23829.2
19.7883	57842.7	29090.3	145556	37.6473	61779.9	36700	186005	2.57888	4042.04	3037.43	10365.1	2.71973	55.0568	54.8347	56.1427	54.3755	6.58023	175.312	170.181	180.359	169.232	17.2608	242.381	254.298	243.536	247.969	24.5657	332.154	336.386	335.976	353.812	53.2928	3159.57	3340.03	3165.86	3085.51	95.0367	9285.35	9806.81	9622.32	9141.63	105.675	7931.01	7242.66	15007.8	14864.5	194.812	48341.9	29274.6
19.7919	55073.6	28788.3	146701	9.21686	15408.8	8946.96	43193	2.73782	4335.77	3125.05	11640.5	2.23383	44.1855	46.946	45.4433	43.8723	5.54518	142.763	147.848	152.506	155.495	12.8859	182.511	176.713	191.287	178.828	26.7187	372.358	378.472	356.487	351.457	58.0986	3563.92	3574.13	3447.15	3536.43	74.0751	7164.32	7413.57	7467.58	7148.45	122.486	8781.81	8945.56	17521.3	18394	186.779	46549.4	26394.4
13.7218	38997.6	19557	100166	17.6468	28948.9	16863.6	88504.7	2.21564	3445.78	2494.35	9376.67	1.1631	23.7366	25.0024	24.8981	23.2337	5.58794	143.819	143.344	154.228	153.074	18.941	271.221	256.621	271.165	278.509	28.5472	392.726	407.095	401.139	395.747	57.108	3544.7	3501.84	3260.55	3367.03	80.6156	8072.68	7623.36	8238.99	8102.71	136.607	9779.82	9544.79	19540.8	19252.1	163.918	39924.3	23727.4
11.109	30635.3	16934	87440.1	38.7786	65054	35260.4	194711	2.68104	4257.28	2996.77	10792.8	4.35733	90.8899	85.2385	91.2152	84.8428	8.80988	241.141	236.085	235.258	234.946	16.7263	228.559	238.929	241.036	244.719	24.7648	335.468	344.987	325.949	341.271	40.5576	2402.89	2535.15	2396.55	2491.95	63.5541	6292.01	6155.14	6574.24	6105.24	147.792	10838.7	10269	21847.9	22105.9	164.761	39791.6	24405.6
18.3047	53488.8	26553.2	131778	9.69385	15972.7	8782.44	46585.9	2.62584	4168.46	3164.12	11409.4	1.33916	28.102	26.6691	27.7607	27.2894	5.59425	151.811	150.646	144.071	143.027	15.3776	212.112	214.872	219.083	212.731	20.9223	291.175	274.099	284.841	290.976	43.4747	2652.68	2531.05	2664.16	2487.39	79.9401	7714.38	7613.26	8235.14	8281.56	114.529	8336.86	7807.41	16404.5	15961.8	161.645	39215	24615.5
17.671	50301.8	24749.8	132507	27.3429	42401.1	25167.4	129648	2.46482	3912.84	2768.08	9903.67	3.16601	63.5039	62.947	64.2539	65.164	5.45688	145.26	151.977	150.118	146.062	11.0064	152.886	152.528	154.422	163.039	25.1916	334.779	351.099	339.124	337.806	59.9642	3701.85	3572.28	3405.09	3703.36	88.9479	9001.72	8689.99	8439.08	8860.05	136.339	9854.38	9836.41	19021.3	19783	170.331	40786.6	25463.7
9.0809	26284.2	13287.2	71105.3	10.6258	16936.6	10452.2	54247.3	2.14516	3474.62	2498.99	9013.6	4.86257	101.172	103.624	99.0327	98.9766	6.81805	190.967	175.819	185.7	188.936	14.6316	197.172	197.181	198.154	210.309	23.609	309.168	322.995	336.385	327.969	30.4658	1822.28	1736.98	1739.3	1790.76	83.2492	8375.09	8625.83	8071.19	8358.57	148.217	11066.5	10809.6	22553.2	20955.9	177.676	42586.4	25056.5
12.9014	35415.6	18704.6	95800.4	13.538	21209.3	12725.2	67574.6	2.55199	4105.5	2862.06	10843.8	2.18218	45.1991	46.8983	43.2565	46.1405	9.01312	237.887	240.221	236.589	232.714	19.8579	274.028	280.773	287.215	292.289	28.7152	379.226	377.297	402.105	396.935	44.4356	2769.27	2562.11	2675.26	2766.28	66.5002	6748.76	6862.77	6429.36	6672.73	133.741	10147.3	9736.73	20500.2	20493.9	178.038	42212.6	27328.6
8.01083	23175.5	12154.3	59262.8	12.0094	19805	11069.4	58327.9	2.69805	4239.12	3274.06	11728	3.24278	67.7476	68.5142	67.3231	65.2968	5.53296	152.948	142.858	150.172	153.187	18.676	256.074	259.952	273.539	256.087	20.896	287.872	277.584	297.203	288.309	45.302	2729.03	2747.26	2652.28	2783.23	91.7047	8645.81	8934.84	8716.98	9505.27	132.154	9628.77	9280.69	19369.6	19553.9	193.785	47872	28385.4
17.0038	45858	24568.4	123687	11.7463	18110	11249.6	56695.6	2.12125	3248.86	2430.28	8965.61	4.07774	85.6057	85.2731	86.9637	83.5635	5.79024	163.024	160.999	156.253	151.519	18.2332	263.68	251.381	262.081	268.643	25.0665	344.399	342.627	342.238	336.667	41.9189	2439.39	2521.39	2410.14	2485.78	75.1374	7257.92	7351.77	7443.5	7530.54	109.929	8113.89	7723.9	16427.3	16364.5	195.01	47878.3	28368
15.3843	42834.7	23561	111328	13.3004	22199.9	12443.5	65300.6	2.16562	3300.09	2653.55	8836.38	1.0818	21.9916	23.1802	22.4313	21.1969	9.20743	236.884	254.053	259.404	256.351	19.4704	274.447	289.024	279.356	267.721	27.3502	379.224	363.224	382.951	376.886	54.1251	3296.91	3189.63	3091.12	3192.52	72.8401	7330.85	7301.92	7262.78	7110.7	124.25	8787.18	8677.85	17792.4	18120.5	194.24	49408	29622.6
12.452	34552.6	17550.4	98325.3	9.31227	15601.3	8759.09	44755.4	2.15676	3453.47	2513.46	9393.72	4.94797	101.448	103.207	99.0335	97.9917	6.12319	172.192	163.88	169.285	171.916	12.0028	168.31	175.999	170.253	174.008	24.3485	318.753	333.757	343.532	330.576	46.2009	2796.08	2633.66	2879.43	2862.32	71.1422	6868.81	7173.13	6838.58	6959.51	106.194	8005.39	7578.61	15684.6	15995.9	176.101	43867.4	26192.5
17.7094	47265.8	25910.6	136208	12.7094	19610.2	11983	65464.8	2.28643	3637.72	2591.92	9515.95	2.47582	49.4646	49.9134	53.0597	52.4035	5.21733	145.793	138.008	139.028	136.481	11.9913	174.51	168.185	174.39	175.43	20.9263	295.738	290.792	282.828	295.25	46.1268	2750.52	2624.32	2833.44	2887.85	88.4057	8806.96	8765	9121.31	8961.23	110.923	8098	7793.47	16330.4	15849.6	170.354	43316.1	24779
9.33853	26314.7	13427.6	72003.5	22.7885	36310	21259.8	114160	2.30156	3594.89	2673.77	10091.6	2.60417	55.8405	53.9937	52.3687	52.1215	8.93657	248.512	240.788	228.682	244.141	17.085	243.587	240.953	251.648	247.407	20.6345	286.04	278.624	279.081	272.902	35.6865	2224.12	2158.7	2182.82	2154.36	63.2398	6030.14	5937.73	6363.44	6349.75	140.162	9918.47	9960.92	19496	20879	150.93	37999.4	21812.6
18.6419	52340.4	26675	147125	13.3877	21957.8	12113.3	66186.2	2.7133	4258.62	3323.88	11111.2	3.25168	66.614	69.6054	65.2057	63.7669	5.46909	145.424	153.036	147.687	145.945	11.3677	153.73	162.506	155.776	167.027	28	398.22	399.075	370.15	395.19	48.7098	2913.6	2938.57	2852.74	2991.31	99.6592	9498.69	9838.4	9646.91	9694.95	142.678	10256.8	9640.29	21747.6	21637.1	167.616	43273.9	25157.3
8.37385	22766.3	12143.9	64875.5	11.6346	17864.2	11241	59587.5	2.95491	4848.23	3511.19	12204.8	4.90803	96.0964	99.388	102.867	101.069	5.00526	137.654	131.874	130.31	135.098	14.8466	215.972	199.96	208.365	213.752	26.2406	347.362	372.426	367.123	353.153	33.6691	1972.44	2063.83	1963.19	2023.4	85.4328	8774.16	8708.33	8059.63	8249.31	144.526	10725	9951.93	21640.6	22188.7	157.932	37982.9	23306.5
13.1133	36022.1	19572.5	98836	28.2509	44744.1	27708.5	132955	2.1345	3427.21	2440.51	8790.73	3.14115	65.6922	61.7639	64.479	61.3343	5.69494	148.222	154.45	159.761	153.069	19.5617	274.835	275.309	267.743	286.038	21.4692	287.777	289.639	299.968	296.901	34.6413	2095.34	2130.05	2004.53	2111.51	97.2901	10080.5	9434.62	9453.08	9576.93	103.739	7849.2	7102.83	15701.7	14439.7	196.755	47613	28737.5
11.2919	33049.4	16629.3	84885.7	35.8391	57579.5	32744.5	176894	2.86433	4516.67	3377.71	12196.6	3.36779	68.6952	71.8058	67.5363	68.6825	5.25995	148.183	144.612	148.074	146.717	16.2427	239.68	237.512	234.737	227.976	20.4516	274.693	291.386	295.396	267.783	56.9021	3401.35	3331.13	3471.81	3445.71	94.4962	8981.02	9439.6	9273.27	9781.52	127.405	8947.3	9120.06	18195.4	18425.4	171.843	41830.8	26075.6
19.224	54260.2	29290.5	141027	29.7239	47233	28496	143364	2.66091	4424.75	3005.3	11538.9	3.25808	65.7994	63.9281	69.4443	68.196	5.29434	144.4	143.232	149.226	137.152	13.1447	191.891	191.087	179.589	191.049	28.0093	386.415	400.897	398.408	381.736	41.9969	2403.19	2602.72	2406.69	2511.25	89.7079	8738.76	8585.65	8929.17	8831.03	149.83	11165.7	10251.6	21594.7	21703.2	157.454	38249.3	22196.7
8.51902	22664.2	12896.6	62531	24.5203	40284.8	23282.3	118442	2.08541	3157	2353.26	8937.74	3.66693	77.9379	74.2606	78.2579	72.4101	6.55779	174.898	184.582	182.424	182.242	15.4852	226.198	226.732	222.358	211.299	27.3006	358.075	376.484	382.336	389.548	46.782	2821.08	2873.29	2909.91	2810.12	92.2868	9191.95	8962.31	9554.64	9281.72	131.051	9965.56	9277.56	19879.6	18458.5	192.736	49948.1	28946
13.2386	35436.7	19926.4	96359.8	15.9729	24507.9	15664.7	79986.9	2.13701	3475.22	2575.15	9087.47	2.62507	53.8973	53.0193	52.154	56.3892	6.52263	168.444	170.753	166.784	169.328	16.788	245.138	234.194	231.171	237.877	23.7755	336.38	313.541	331.87	312.09	56.5061	3492.17	3234.22	3300.67	3450.65	68.7288	6517.49	7107.48	6910.33	6898.17	121.705	9065.06	8480.49	18389.5	18538.2	151.759	35921.7	22736.7
12.9087	35453.6	19319.9	94307.9	10.0355	15643.6	9022.38	47928.1	2.36012	3850.67	2893.23	9855.66	4.04361	80.8409	81.6066	82.4848	85.31	5.37283	139.84	147.33	141.767	147.439	10.9261	155.221	152.677	157.834	159.502	25.4103	346.062	340.055	364.058	350.782	50.5609	3069.07	2899.44	3149.13	3036.69	83.6844	8360.32	8155.54	8283.15	7907.49	101.379	7468.36	6973.14	14358.9	15426.8	158.251	40578.7	23382.1
11.6041	31599.1	17367.4	85122.7	13.929	23201.1	12533.4	65007	2.98343	4759.74	3536.52	12543.4	3.43415	67.3841	67.8505	72.8976	66.934	9.21619	250.142	242.755	250.786	254.563	12.1294	177.098	170.46	166.521	165.667	20.9921	280.316	288.429	282.625	298.393	35.4058	2144.86	2205.61	2045.83	2207.85	94.1943	9325.69	9222.31	8895.58	9717.1	149.035	11296.6	10010	22763.1	21739.1	182.375	46408.3	25817.4
11.3238	31494.1	17131.8	82930.7	24.3733	38341.3	23115.2	124644	2.41143	3914.87	2845.8	9751.31	2.83129	60.1281	56.2605	58.7687	59.992	8.77657	240.723	247.027	226.603	224.748	13.8119	201.561	189.29	191.159	194.92	28.3193	407.995	386.922	391.99	402.004	31.1833	1944.77	1878.84	1867.74	1887.27	79.4838	8163.88	7610.2	8206.57	8043.91	141.798	10201.4	10141.2	19768.5	20264.3	184	47798.8	26474.9
8.42848	22531	12834.2	65988.4	30.6308	49570.7	29961.6	157120	2.30129	3762.63	2691.58	9561.73	3.3617	71.8007	67.1567	70.4393	71.7907	7.57512	196.297	197.274	213.096	203.602	11.1911	163.201	165.965	157.081	165.208	26.6661	377.435	376.44	367.74	358.933	33.6747	2017.47	2089.75	1973.36	2104.93	76.0576	7363.56	7513.42	7164.19	7241.58	143.01	10629.4	9885.74	21549.7	21703.2	157.597	38880.8	23657.8
7.62228	22316.9	11533.1	55229.4	17.7165	27146.9	16798.3	89057.3	2.34951	3642.15	2650.34	9790	1.71001	36.4398	35.2451	36.2024	35.4685	5.00002	130.743	137.666	130.307	134.254	14.9992	207.93	201.565	212.408	213.355	23.2547	324.384	315.086	314.6	320.439	35.2504	2150.89	2210.28	2107.54	2018.29	75.5539	7627.15	7495.3	7191.73	7543.54	113.435	8012.57	8161.22	16587.4	17209.3	196.561	48466.8	27970.4
15.9764	43441.8	22978.3	119088	19.8718	32042.3	18203.2	97477.4	2.39747	3751.49	2870.1	10250.6	4.53073	94.5862	95.5778	95.9172	95.8538	8.14253	219.758	213.403	209.216	220.495	10.0483	144.766	141.629	147.692	143.066	25.1346	331.862	349.121	359.789	348.596	30.378	1838.22	1777.31	1819.85	1845.53	96.265	9868.32	9056.04	9712.49	9245.94	118.469	8595.23	7921.96	16656.5	18009.4	198.8	49797.3	28264
16.8977	46837.1	24182.6	124070	32.4682	50767.4	29987.5	162099	2.19792	3433.89	2541.9	9111.97	4.94599	96.5822	101.545	103.616	105.523	7.58634	199.275	211.846	213.128	205.383	12.3676	171.462	179.919	178.11	181.248	20.7661	273.655	287.484	279.558	297.906	30.4829	1756.5	1802.16	1856.99	1745.15	86.6368	8899.22	8691.57	8627.93	8175.73	125.276	8668.8	9152.96	18240.6	18805.2	180.829	44894.1	26773.7
19.971	56142.8	28531.4	151894	14.7327	22602.8	13254.2	68748.5	2.31563	3713.34	2669.28	9999.32	4.02104	78.5006	80.7223	79.464	80.2313	7.5248	206.211	201.703	198.468	201.224	18.38	269.649	248.203	258.484	257.113	25.9437	373.774	356.093	340.945	372.999	48.7211	2927.74	2833.86	2909.05	2922.13	60.6418	6017.9	6081.19	5972.21	5897.6	146.921	10423.6	10042.1	21925.6	21157.6	168.745	43099.3	23879.4
17.2298	46679.6	24883.5	132531	33.5705	54561.7	31061.4	169132	2.26669	3630.49	2626.9	9622.23	2.57119	53.3395	54.5113	54.6738	52.3944	7.36837	199.535	191.734	201.667	191.646	14.4399	200.609	212.922	208.601	212.491	22.5711	320	314.671	307.612	305.774	43.3748	2556.34	2632.54	2516.97	2700.11	73.779	7398.65	7504.62	7498.42	7033.51	122.796	8847.78	8809.66	17532.7	17385.4	152.861	37581.8	23096.4
10.9383	29367.4	15359.1	83325.9	23.8871	36398.7	23199.6	115179	2.74126	4469.92	3136.21	11409.4	3.8373	76.5612	78.2849	82.422	76.9078	6.22041	161.354	167.466	166.754	170.485	16.305	227.184	234.01	241.932	231.337	26.0217	372.911	356.547	355.633	351.89	59.3153	3373.36	3615.25	3413.75	3370.62	86.668	8276.39	8429.66	8484.24	8801.1	102.378	7459.71	7014.82	15181.5	14380.1	188.068	46221.8	27756.1
16.7127	47739.2	23372.1	125633	15.5626	24082.5	15074.8	78408.7	2.98959	4754.38	3591.64	13245.6	3.24921	68.1946	63.9904	69.5211	67.287	6.7831	181.489	175.007	191.009	175.407	10.0743	143.372	135.924	136.546	147.833	26.6382	369.068	370.004	375.484	366.962	44.3503	2774.38	2742	2543.87	2564.5	80.7768	7846.74	7767.31	7723.2	7633.58	129.69	9556.52	9047.78	18962.9	19837.4	187.107	48063.7	27887.1
19.9828	56014.8	30295.3	156309	33.7427	54607.3	33333.8	170962	2.7877	4235.67	3114.9	12192.4	4.93362	100.443	98.1793	102.06	105.517	8.92624	233.324	233.942	228.549	240.855	17.4039	256.388	250.516	244.875	239.324	29.7174	409.649	404.71	408.807	408.191	49.4972	2914.84	2993.02	2815.62	3033.55	92.912	8746.48	8839.22	8997.39	9429.84	116.318	8354.64	7895.08	16764.5	17148.3	179.259	44388.2	27202.7
12.3848	33463.1	17380.9	92105.3	12.0471	19978.2	11544.9	59807.4	2.24325	3545.01	2599.61	9610.86	2.30486	44.9785	48.6525	46.1476	49.1464	8.33737	215.035	217.889	221.969	224.256	14.068	190.132	207.114	202.545	204.209	20.5908	284.832	273.932	289.197	280.234	36.2382	2175.72	2171.01	2269.12	2173.84	84.5934	7976.46	8075.41	8756.25	8142.32	131.154	9246.42	9504.96	19948.4	19937.9	182.859	44555	27774
6.20931	17418.5	9344.13	49033.2	34.6829	55937.7	34031.1	163789	2.93413	4615.77	3552.06	12102.5	2.60672	55.7536	53.6291	53.2616	54.9293	6.90112	184.256	178.645	187.563	183.469	12.9645	191.415	184.726	191.378	191.315	20.2607	288.976	291.565	285.872	281.94	54.1382	3248.11	3282.79	3095.71	3130.45	98.9317	9403.61	9456.69	9387.3	10010.8	115.133	8515.15	7955.42	16505.6	16738.2	172.576	41656.3	24075.7
10.8174	31776.1	15990.9	80355.4	25.7398	42136.3	24527.6	126942	2.45341	3939.65	2774.99	9910.67	4.93488	100.108	98.1323	96.8187	98.6699	7.39406	189.933	195.284	189.806	191.82	19.9992	290.473	296.554	287.062	280.521	20.4261	291.301	291.489	292.059	291.747	42.2091	2615.06	2524.25	2571.75	2541.57	91.2143	8903.91	9019.7	8635.41	9351.88	120.589	8456.02	8371.23	18257.1	16908.5	169.953	42701.6	23937.3
8.42389	24287.6	11846.9	61663.4	30.5983	47050.7	29130.4	146784	2.22196	3391.03	2723.08	9732.14	2.7771	58.3281	57.1808	58.5565	55.3545	8.71757	224.818	233.459	227.305	234.161	17.7528	259.6	239.651	242.199	262.437	28.3142	376.101	373.167	404.763	384.752	31.9688	1885.98	2006.04	1974.46	1917.91	66.5529	6740.02	6620.72	6277.57	6821.68	138.42	9952.58	9427.21	20992.6	20219.8	177.245	44306.8	26902.9
19.5464	54833.2	28460.6	146848	14.8622	23048.3	14306.4	71616.6	2.38998	3833.29	2777.72	9633.17	2.55328	50.0103	53.8651	54.3781	54.2074	9.45512	242.802	258.948	249.549	255.182	12.8821	190.608	185.199	190.045	185.993	23.8516	319.425	335.049	331.919	329.506	39.7427	2357.72	2317.63	2300.58	2262.37	91.3654	9384.35	8879.36	9025.05	9390.04	148.758	10469.7	10080.5	22837.9	20962.9	186.119	46967.1	26782.3
14.4482	39627.2	20674.1	103908	10.0947	16930.2	9896.65	49942.8	2.81778	4520.96	3273.26	11992.6	3.15789	61.865	66.7927	65.1009	66.2694	5.22918	135.412	142.448	139.295	145.692	17.7087	256.743	240.602	242.53	259.665	28.0024	401.226	388.785	384.99	380.482	39.1737	2331.34	2320.1	2294.9	2364.98	91.2122	9161.45	9004.65	9218.52	8824.46	115.844	8206.86	8271.76	17705.7	17379.8	152.275	36113.3	22329.2
6.40741	17870.6	9865.55	50636.6	16.8015	26979.6	15259.7	81163.7	2.38376	3885.25	2762.65	9603.04	3.8877	81.7672	78.8462	77.7908	79.1097	8.15508	212.438	210.437	217.207	222.992	18.0111	245.075	247.8	262.274	249.678	21.9626	313.661	302.95	312.407	289.508	44.0652	2538.73	2702.84	2597.74	2633.43	95.2706	9239.76	9732.09	9344.65	9204.26	141.835	10473.2	10214.7	20340.9	21451.4	192.077	46788.7	29246.2
18.8996	52369.6	26976.7	145163	34.0096	52173.1	30908.9	174609	2.17771	3369.73	2518.15	8811.86	1.15313	24.71	22.5372	23.0477	22.777	5.02736	139.515	134.598	134.234	137.247	13.1806	184.619	188.824	189.936	178.297	22.7614	303.669	321.959	309.391	329.119	32.525	2011.69	1933.65	1924.87	1903.27	65.7376	6346.41	6720.59	6681.78	6658.46	112.669	8548.11	8055.07	16762.1	16378.4	157.756	40276.6	22882.2
16.436	48134.1	23824.1	125594	23.7713	36182.3	21562.7	122485	2.17816	3351.07	2497.32	9023.79	1.43314	29.421	29.6512	28.5909	29.8337	9.86711	272.242	263.588	260.339	253.442	19.3584	284.339	283.423	271.808	283.346	23.5658	308.536	337.331	336.476	310.693	32.4297	2004.14	1865.91	1841.93	2014.77	93.1239	9215.52	9200.16	8900.48	9173.39	135.753	10350.6	9946.42	18881.5	19000.9	169.593	43626	25619.1
13.9642	37578.2	20249.6	110312	28.8229	46360.9	26422	145278	2.82456	4628.24	3262.35	11880.5	2.12453	45.1839	43.9749	42.6892	44.7474	8.88367	249.116	243.553	232.697	229.666	18.634	252.467	258.897	256.262	265.038	25.6414	337.975	367.012	347.423	357.148	45.8337	2646.55	2685.27	2657.16	2690.24	76.9038	7391.41	7820.71	7846.45	7326.12	148.918	11338	10854.1	22486.9	20752.1	168.26	42128.2	25247.5
9.25611	24770.9	13468.7	70522.8	39.8763	62828.4	38124.7	186753	2.56814	4159.73	2919.31	10949.3	4.12046	88.4632	85.1311	82.0558	84.2331	9.72847	256.047	271.52	264.897	266.729	14.2179	210.168	203.252	203.9	199.142	27.8327	383.793	376.899	383.979	365.733	45.3214	2664.88	2606.3	2675.98	2714.03	86.4208	8127.71	8209.39	8328.76	8594.03	139.957	10558	9711.42	20913.5	21359.8	181.533	44536.4	26620.7
12.2536	35946.3	17401.4	91624.6	30.0295	49876.3	27940.2	146443	2.20028	3385.1	2661.61	9552.61	1.66079	32.8779	35.235	35.5511	33.9807	6.97907	180.784	191.647	188.867	181.699	12.2826	173.504	179.512	174.422	178.128	26.7133	380.67	374.085	363.857	353.281	46.4056	2900.01	2873.99	2786.9	2642.7	75.0795	7272.55	7581.7	7189.25	7710.4	107.745	8126.32	7338.72	15095.3	15605.1	196.66	46548.6	28839.5
17.7306	51509.1	25765.9	128874	27.4564	45200.2	25015.1	135282	2.10779	3411.02	2476.46	9077.88	1.54669	30.9634	30.1452	30.7627	32.897	8.63335	232.061	242.079	232.324	226.951	17.2331	237.717	247.707	236.413	244.258	25.4337	359.657	359.75	360.645	333.736	34.607	2134.98	2118.52	1987.78	2165.34	88.3385	8661.87	8514.75	8656.29	9065.88	139.831	10363	9622.33	20022	19845.6	196.642	47976.8	27575.5
5.35827	15515.9	7988.15	39501.8	26.1396	40615	25564.6	129039	2.1323	3395.35	2481.48	8933.1	2.89631	58.8336	57.895	59.6633	58.3737	8.50219	229.977	226.568	238.772	238.323	11.0332	151.333	156.885	154.509	156.292	20.2625	288.613	274.061	290.489	269.039	39.6658	2263.63	2348.54	2265.89	2377.54	79.4987	8054.39	7610.08	8183.01	7627.5	138.78	9720.15	9431.55	20789.1	21245.6	199.067	50380	27933.1
13.527	37315.9	19512.2	101663	16.6048	25672.3	15251.8	80204.2	2.27546	3494.41	2772.31	9520.45	2.24226	44.0564	44.065	44.4286	46.6707	9.67687	257.468	253.195	267.69	264.868	16.411	226.41	234.888	227.726	222.444	23.8743	333.586	322.945	315.736	316.522	40.8726	2446.78	2471.83	2352.49	2328.86	98.4584	9907.72	9278.43	9845.52	10028.1	132.406	10125.3	9000.2	18557.7	19315.7	163.075	41019.7	23985.9
11.0874	31269.3	15979.8	86194.6	15.0063	24926.5	14755	73148.2	2.63701	4230.3	2963.2	11475.2	4.31692	91.5584	84.4008	85.222	88.3161	9.42192	243.797	264.744	248.294	264.941	11.6813	161.612	172.055	159.559	171.866	26.9145	382.367	365.139	377.733	373.349	58.6983	3496.92	3447.17	3424.24	3495.05	99.1397	9647	9930.7	9686.02	9419.4	101.576	7489.5	7075.49	15080.8	15417.4	178.404	46102	25231
6.2748	17304.9	9375.83	46999.6	38.9931	59476.9	37259	200276	2.87423	4587.93	3415.26	12678	1.35988	27.9374	28.406	28.2427	27.8744	8.1474	229.146	219.22	217.148	225.399	12.3187	169.451	169.298	178.934	166.198	26.7487	364.373	354.535	374.123	360.964	31.5006	1946.98	1944.52	1972.2	1951.84	86.8493	8881.22	8396.34	9009.02	8913.92	120.555	8623.84	8535.94	17276.3	16763.2	168.855	43601.3	23514.5
18.9088	53868.5	27874.9	147483	9.04509	14552.6	8578.9	45467.1	2.69607	4328.27	3178.48	11584.4	3.56912	70.499	75.0378	73.731	72.1116	5.06394	134.003	140.437	132.302	140.995	12.5437	175.446	176.162	179.46	171.088	22.1689	306.662	303.745	305.148	316.772	33.4296	2017.32	1899.53	2025.28	2048.89	88.0064	8956.1	9006.64	8447.68	9046.54	137.274	10273.3	10028.9	19300.6	19706.1	183.242	43456.7	25704.6
11.6735	32103.9	16999.9	91888.6	29.4231	46203.6	27073.6	138004	2.48149	3762.1	3017.33	10005.4	2.4462	48.8001	48.614	52.1456	51.6353	5.99892	155.844	169.47	167.645	169.327	18.0526	247.052	255.84	259.454	261.705	25.0116	341.707	336.46	361.257	336.779	38.5783	2391.35	2243.71	2351.04	2251.33	84.6541	8222.66	8004.06	8474.21	8088.56	121.37	8915.95	8783.43	18488.6	17815	194.813	46436	29471.7
10.6305	28366.5	15238	77463.1	10.9237	17345	10436.9	52771.2	2.68073	4453.33	2996.39	11771.6	2.21459	45.6178	44.2698	45.2384	47.5886	9.77279	256.907	267.905	265.755	252.348	13.5979	195.702	183.97	191.555	193.472	24.2439	329.249	322.379	348.029	346.151	52.6426	3144.42	3211.79	3294.97	3159.12	81.8974	7721.32	8452.73	8445.08	8021.02	107.399	7618.97	7239.44	16468.3	15074.4	177.091	46016.7	26714.8
17.9963	49998.7	26092.5	130422	32.7813	52995.2	30811.3	165782	2.54908	4019.45	2933.4	10621.9	2.45325	48.189	48.9473	50.3119	50.1941	6.53524	172.088	172.967	178.028	180.302	10.7703	150.301	145.598	159.895	152.071	25.1139	335.617	345.134	335.515	357.708	56.8494	3304.49	3307.14	3433.72	3404.08	83.8678	8617.78	8081.42	7914.5	8366.44	126.576	8811.29	8526.23	19205.5	18631.4	181.394	46922.4	25665.6
5.68863	15282.6	8188.81	43343.7	25.8973	42873	25212.8	130884	2.20469	3545.22	2652.11	9325.43	3.28715	64.0054	67.1749	66.3944	64.218	8.26564	221.558	219.583	233.181	215.651	13.0537	185.177	180.176	192.136	193.226	21.1269	286.581	305.389	302.215	279.868	38.6041	2409.38	2305.18	2393.71	2236.87	80.5171	7719.18	7604.29	8066.08	7922.35	121.498	8620.76	8896.57	17517.2	18324.7	181.561	43195.6	26691.4
17.7176	51110.4	26822.4	137901	37.6568	58742.8	34532.6	178748	2.84268	4733.49	3299.28	12233.3	1.28036	27.0931	24.9887	25.368	25.7585	8.80803	236.134	230.766	227.122	230.305	13.521	196.233	195.532	199.108	197.741	26.3975	364.087	347.452	353.501	352.598	37.7614	2242.77	2346.71	2263.88	2302.01	70.3141	6718	6918.99	6839.69	7002.8	123.406	8878.96	8853.64	18499.6	17638.1	158.513	40187.5	23281.3
9.46066	26268.7	14288.8	71815.4	34.5715	57210.1	31079.3	162652	2.74499	4166.65	3330.46	11702.8	1.80549	37.1064	36.4645	35.5725	38.6208	5.88001	161.747	150.722	165.826	152.892	16.7603	246.053	248.597	231.777	243.692	29.7303	420.293	418.62	410.579	423.008	51.769	3158.6	3173.05	3053.14	3141.54	91.8536	8834.91	8990.09	8862.05	9074.14	146.222	10801.1	10622.5	21170.3	22253.5	180.169	42935.8	27358.5
13.1337	36319	19585.7	96792.5	14.8927	24986.5	14413.1	71187.3	2.30015	3483.16	2804.96	9943.13	3.74042	77.1973	74.9131	74.9209	79.2267	8.42124	223.176	231.981	233.244	221.74	11.1148	149.881	156.65	163.793	150.94	22.989	317.192	310.369	330.089	304.809	32.4602	2004.83	1845.34	1951.06	1894.83	90.655	8603.73	9012.04	8720.31	9006.23	112.254	8332.12	7736.16	16693.1	15815.5	189.76	47389.7	28432.5
17.7158	47611.9	25171.6	127795	29.2239	46366.6	28701.3	137403	2.07944	3187.59	2564.21	8571.72	3.85897	80.386	80.787	79.3646	80.0153	9.96777	278.798	279.59	255.44	259.077	11.7776	172.441	158.43	161.767	171.031	28.5387	376.852	404.693	403.382	402.979	51.9322	3056.54	3183.01	3052.88	3114.41	95.2064	9587.31	9782.14	9667.53	9789.38	141.749	10424.5	10356.9	21660.1	21516.7	166.369	40021.5	25381.5
17.0252	48177	24909	125976	20.4966	31225.6	19533.1	96923.2	2.48888	3868.51	2911.98	10745.6	1.89376	40.3084	39.0556	37.9112	38.5009	8.56118	219.802	225.56	241.104	230.804	16.5117	229.508	227.718	226.216	243.194	28.4099	382.816	379.771	400.017	394.658	35.3829	2029.65	2202.47	2154.92	2134.34	64.4752	6658.69	6421.02	6278.48	6454.01	108.261	8207.83	7768.03	16059.5	15194	172.78	42205.7	24728.8
16.9692	45583.9	23854.4	130282	18.8541	29559.2	17932.5	89017.2	2.81162	4252.72	3353.3	11912.6	4.74043	94.2087	92.8536	97.3523	100.836	9.17604	258.82	244	252.568	255.077	14.6308	206.951	213.57	208.497	213.042	25.263	346.397	364.554	348.386	346.384	47.7669	2839.46	2717.68	2862.78	2990.74	91.6315	8899.15	9499.42	8637.08	9352.69	136.526	9923.14	9978.84	19725.8	20014.4	192.992	49318.1	27572.6
16.4403	47697.4	23308.7	120918	18.6668	30301.3	17189.1	91781.3	2.46751	4020.36	2931.74	10538.5	1.54078	30.433	32.4933	30.886	31.1711	5.94955	159.386	154.603	161.127	156.179	15.6935	227.938	216.23	221.085	221.591	22.5607	306.099	325.28	301.499	305.205	59.9504	3752.66	3489.6	3427.57	3625.26	75.9316	7454.44	7848.61	7585.57	7828.38	147.929	10832	10209	20987.4	20946.1	198.323	48004.4	28372
16.8287	45677.2	25792.8	130303	27.5118	45232	25569.8	138501	2.86615	4763.24	3341.47	12332.1	1.63514	32.7364	32.0151	32.3158	34.6809	6.21832	169.669	163.694	172.023	174.394	14.2128	206.697	194.252	206.588	191.819	25.0616	340.917	333.216	348.544	329.191	34.0089	2035.69	1969.52	1961.21	2100.83	90.2279	8774.49	8851.72	8613.98	8793.92	149.947	11444.6	10233.7	21147.6	21278.5	178.069	45807.8	25279.7
13.9119	38321.5	20599.9	104938	10.8459	16830.6	10199	55143.9	2.81113	4300.36	3234	11342.7	1.33596	26.7185	28.5349	27.7875	27.9052	6.06485	160.097	164.268	157.183	168.193	10.7254	146.251	147.931	158.255	151.595	25.8574	361.178	371.731	365.083	346.167	32.7092	2040.69	2043.64	1889.16	1913.61	78.5642	7916.47	7546.43	7662.36	7622.96	135.777	9956.36	9298.11	19813	18950.2	160.468	40455.7	23432.3
5.31	15094.6	7931.23	41057.2	35.8827	55314.4	35277.7	184579	2.8152	4535.11	3219.13	11840.9	2.15678	46.3876	43.109	42.4739	44.7446	8.80387	243.442	232.176	248.081	235.988	12.1551	165.356	163.301	175.026	177.418	25.2569	332.672	353.237	349.173	358.337	48.1609	2874.32	2933.7	2950.19	2894.48	72.3468	7296.52	6901.31	7431.88	7133.12	118.836	8429.89	8387.41	16727.8	16937.4	158.839	39456.4	22147.6
9.24674	26879.7	13740.9	67670.7	18.7438	28686.9	17587.4	93812.4	2.45224	3985.98	2871.84	9918.5	1.58557	33.0503	32.7687	33.4366	32.7437	5.72845	150.081	152.95	160.986	146.796	19.7406	285.823	283.221	276.964	271.693	28.6519	408.674	393.266	387.983	377.046	43.0204	2483.61	2457.61	2689.68	2695.78	85.3757	8329.57	8367.5	8793.15	8352.59	125.548	8927.19	8908.35	17788.3	18222.7	168.304	40212.7	25723
7.07236	20479	10562.5	54831.8	16.3846	27435	15876.5	77399.4	2.73961	4142.56	3317.23	11815.4	2.60323	53.8951	53.4573	54.4633	55.5506	8.30841	226.644	226.624	219.96	218.456	10.956	147.278	153.727	148.862	153.088	23.0532	330.583	333.524	304.939	317.785	52.3916	3217.74	3013.96	3275.13	3019.19	87.2599	8283.3	8905.91	8502.11	8608.76	110.782	7965.17	7855.39	15919	16206.8	192.602	46278.1	28938.1
15.3596	43374.1	23331.6	114080	14.125	23654.5	12889.3	71506.5	2.88066	4771.76	3286.94	12013.9	3.39278	66.2784	70.2837	66.9741	66.8913	7.48698	199.881	210.305	193.576	202.114	16.5131	230.043	242.059	223.223	222.559	22.4939	298.979	312.501	298.639	307.634	39.8565	2490.21	2332.1	2289.13	2458.28	68.1804	6928.14	6995.52	6664.97	6638.92	148.394	10679.9	10830.1	22757.4	21786.8	156.926	38822.6	22140.5
9.20716	26331.4	13545.3	71185.9	37.1676	60075.4	36110	185452	2.34172	3853.23	2686.16	10230.4	2.19338	46.6251	44.3227	43.1247	44.7292	5.18299	141.988	142.241	144.687	140.924	17.4407	241.926	242.13	252.333	255.717	28.1731	400.649	378.158	380.223	406.429	52.4577	3090.37	3284.59	3178.17	3097.21	66.144	6282.95	6339.56	6549.77	6343.26	112.387	7973.63	7564.9	15696	16232	186.429	46788.9	26116
17.7798	47705.9	25254.9	138905	22.959	36561	21527.5	110763	2.25222	3736.43	2768.33	9816.54	1.85463	36.4301	36.6771	37.6073	36.8676	9.32352	243.394	242.814	242.847	262.457	18.0476	259.773	249.524	245.985	246.135	26.0157	352.164	374.167	355.96	345.836	49.429	2934.56	2940.97	2911.41	2907.17	67.676	7000.35	6909.71	6548.28	6727.71	140.759	9994.07	9806.88	20056.4	20352.5	180.6	44944.1	25553.9
16.5777	45286.1	23720	123482	20.1752	32535.3	18123.4	103492	2.3016	3587.01	2690.56	10177.9	1.14467	22.6916	23.6546	24.2443	23.4339	6.84128	179.093	186.049	184.598	181.663	15.1487	221.423	208.95	209.692	203.639	21.4991	310.798	309.53	296.468	298.366	35.8656	2128.49	2207.62	2086.62	2242.16	89.0775	9212.85	8779.79	8593.15	8875.71	126.892	8990.22	9317.24	18274.8	19096	191.692	48103.7	27855.3
15.6056	42634	23961.1	115294	18.2664	27864.6	17403.7	91815.9	2.46603	3813.04	2915.55	10713	2.99236	59.1771	63.9884	62.208	59.1328	7.20533	191.643	201.698	191.463	198.256	16.2563	223.07	239.009	232.635	228.9	20.004	275.671	270.956	270.081	283.462	33.4531	2011.25	1998.81	1900.56	1938.5	61.15	5745.22	6052.22	5852.36	5987.64	102.309	7582.21	7417.29	15299.2	14898.9	168.678	39895.5	24858.3
7.01702	20397.4	10262.4	54447.1	38.3814	60596.5	35376.7	196460	2.92989	4711.25	3479.83	12338.4	3.34935	66.382	65.2994	70.4346	67.217	9.69502	271.979	251.685	250.896	273.782	18.5268	255.404	249.014	260.979	257.747	25.1724	351.792	348.905	362.119	351.523	38.2517	2345.66	2378.28	2264.29	2281.95	62.3254	5981.79	6055.66	6406.47	5930.94	100.994	7134.68	6824.45	15318.2	14804.2	169.221	43681.2	24614.1
16.9016	49545.3	25607.6	131350	34.0057	55128.2	33359.7	171739	2.97332	4549.83	3347.48	13019.2	1.479	31.2699	29.8482	29.8789	30.0103	6.24304	174.001	162.477	166.541	173.022	13.0202	185.154	178.336	185.564	192.3	21.6208	292.464	291.018	309.808	296.42	41.93	2564.83	2457.1	2463.89	2583.99	99.028	9475.24	9317.92	9604.45	10210.2	117.592	8362.42	8016.45	16834.5	17610.4	189.019	48702	28410.2
10.9219	30380.9	15398.5	79192.9	11.6916	19170.3	11003.1	59460.6	2.48154	4078.27	2825.12	10656.6	1.6151	34.4847	33.4236	32.5172	32.9213	9.19283	240.235	255.307	258.783	252.902	19.2807	275.782	282.489	262.223	285.821	21.5369	304.884	293.128	302.369	292.408	52.933	3222.92	3265.97	3296.53	3024.94	71.7062	7168.43	7109.61	6865.92	7118.61	105.438	7993.66	7272.27	15104.7	15050.5	186.308	46881.8	27074.2
8.2161	23209	12447.1	60745.1	37.7848	58435.6	33926.7	188013	2.84885	4329.59	3481.47	12587.9	2.33236	49.1769	45.5787	46.6675	46.9448	5.32042	141.895	139.288	136.615	143.445	19.2226	260.506	271.7	283.247	269.316	28.8532	392.594	398.429	396.404	380.548	34.5413	2087.53	2034.51	2162.94	1987.4	79.1517	8206.62	7566.62	7505.25	7982.67	107.472	7852.29	7306.57	14997.3	16156.7	178.081	43121.7	24873.2
15.9361	45768.3	22240.3	119065	18.3878	28297.1	17669.5	93106.1	2.05196	3200.59	2322.73	8880.83	4.16399	84.1153	86.3307	87.0004	85.6311	7.08662	182.654	195.672	190.866	181.947	12.8776	174.931	183.158	185.097	182.936	28.2419	401.679	373.504	372.869	383.516	44.5258	2746.74	2531.81	2619.71	2687.01	74.287	7008.17	7155.68	6996.96	7239.26	122.605	8678.09	8897.32	18787.2	17646.2	164.867	41619.5	23852.8
15.0409	43381.9	22927.7	109584	22.4041	35976.8	21333.2	107191	2.68289	4223.45	3047.47	10926.5	3.80474	80.734	74.2165	81.4326	76.2395	5.52397	151.961	148.375	155.435	150.373	13.8523	204.425	196.947	189.982	204.435	24.5735	349.154	354.214	340.595	338.023	56.3857	3421.37	3473.65	3246.62	3487.96	63.2891	5974.98	6104.29	5959.1	6456.08	111.596	8364.5	7503.9	15626.4	16967	196.327	50462	29161
8.42868	22538.5	11986.5	65672.1	25.5678	39405.3	24951.4	126713	2.40091	3898.18	2956.83	9982.73	4.3014	89.3714	91.267	92.1751	88.1748	6.53688	168.457	183.493	171.9	170.507	11.734	172.814	165.865	163.001	170.004	29.8664	410.469	415.165	409.441	406.064	38.9559	2247.92	2218.5	2439.11	2251.62	83.7472	8439.87	7918.45	8505.79	8501.09	122.088	8516.26	8681.56	17808.3	17992.3	150.269	38414.8	21712.2
17.014	47413.5	25731.3	123257	31.9907	50322.8	30004.2	152648	2.99305	4807.55	3605.96	12232.5	3.04079	64.6603	65.1661	61.4626	62.187	5.40955	142.147	151.516	140.086	151.57	13.1326	194.746	188.215	180.268	177.627	28.9091	407.867	418.044	396.967	404.742	36.5409	2205.12	2235.03	2115.2	2108.24	61.337	6245.32	6136.61	5808.15	5812.3	126.305	9073.95	9008.2	18698.8	19176.1	181.626	42981.4	27459
13.0251	37428.3	18435.3	101044	16.8896	25706.2	15182.7	81939.3	2.38493	3642.62	2873.5	9911.09	1.06084	21.4579	21.6687	22.424	22.5512	6.58479	169.71	179.379	183.83	175.924	13.6795	197.251	186.157	189.802	196.502	27.7215	373.147	380.338	383.486	373.731	30.1867	1808.43	1844.92	1835.83	1783.86	68.8542	7074.86	6469.03	6506.89	6777.39	125.599	9472.02	9039.01	18902.8	18352.8	171.517	42889.5	26123.9
19.3815	53935.5	28843.5	144695	35.5308	55358.1	33002.9	180905	2.77503	4432.25	3098.01	11248.5	3.31232	66.2263	70.5404	66.7008	67.6556	6.98431	195.916	184.42	184.444	192.409	18.5559	263.443	258.838	272.762	262.307	24.9987	339.9	329.79	330.115	348.478	55.6415	3460.51	3313.56	3317.47	3272.28	71.8913	7149.84	6776.08	7168.27	7353.51	130.782	9200.38	9363.94	20020.9	18554.8	190.813	47445.6	28028.8
17.6871	51357.2	26423.5	136321	25.8431	43159.4	24719.2	129623	2.05179	3372.62	2397.5	8753.27	4.90823	102.078	96.61	99.9645	99.0762	8.81913	245.28	239.045	238.522	247.076	10.6863	145.177	157.686	154.176	153.948	21.2107	291.367	294.088	301.464	296.46	34.606	1974.66	2050.9	2150.35	2136	71.1058	7090.61	7167.31	7092.33	7206.98	109.665	7755.01	7711.35	15447.9	15792.2	159.404	41504.3	24191.4
12.3515	33853.8	17572.3	94362.6	24.9001	40410.3	22418.3	119569	2.48504	3964.36	2830.41	10194.8	4.80098	97.7505	100.934	95.1378	98.4804	5.76733	152.586	152.766	157.625	158.803	19.7263	279.543	275.906	287.286	280.25	20.527	291.118	293.145	296.828	294.424	42.7515	2485.59	2474.38	2638.58	2619.67	85.6272	8107.9	8360.68	8674.76	8553.63	132.298	9384.16	9354.32	19065.9	20195.9	164.974	41816.5	24174.7
19.2183	51812.4	28556.5	139306	36.6095	61355.5	34114.9	188235	2.50981	3927.79	2978.97	11087.4	1.24183	26.5395	25.5647	25.9664	26.65	9.91277	268.104	255.52	262.39	268.246	18.5014	271.361	260.792	250.33	259.234	28.9625	392.457	383.871	409.578	400.215	49.937	3051.57	2997.92	3100.14	2857.42	67.905	7040.55	6648.23	6753.38	6948.65	146.719	10920.1	10026.7	21197.4	20425.2	169.618	44003.1	24404
14.3456	38790.5	21547.3	113397	15.9578	25907.1	15681.3	76806.4	2.5022	3855.14	2934.49	10667.8	1.8777	37.1316	36.5744	36.6653	37.0488	6.38576	177.011	170.786	176.866	174.85	16.6486	240.261	245.25	244.856	239.136	21.6369	287.556	298.991	296.139	286.081	45.6852	2650.65	2822.65	2605.3	2832.99	97.5359	9565.79	9262.62	9398.64	9919.39	116.221	8780.29	8046.98	17337.4	17358	195.981	47073.9	27897.1
10.8954	31419.6	15807.6	78805.4	29.0904	46009.9	28305	136767	2.96683	4891.15	3526.52	12090	4.14609	84.3713	87.9957	88.597	85.3718	7.1858	195.204	186.83	188.823	197.748	18.7223	268.955	269.543	270.498	265.165	28.6667	394.981	403.193	386.522	380.061	49.4727	3028.58	3016.74	2862.78	3084.1	70.0665	6640.83	7179.79	6982.95	6643.89	131.563	9146.74	9143.26	19814.9	18355.7	153.999	39937.9	21830
12.8183	34652.6	19738.8	93459.2	34.1332	55510.7	33184.6	173912	2.70408	4328.07	3085.65	11501.3	3.54914	72.7258	76.1251	74.0053	71.6961	7.39906	193.901	192.11	194.121	201.592	16.9087	239.042	245.765	248.908	240.463	26.7788	374.2	371.612	369.207	361.238	58.3741	3557.16	3657.27	3616.36	3600.76	74.4375	7141.06	7157.26	7377.63	7592.49	138.372	9585.28	9697.79	20045.8	20876.9	178.313	42379.3	25192.5
16.1228	46891.1	23293.4	126581	39.7836	60692.8	38976.5	200204	2.53536	4016.75	2959.13	10904.6	4.33648	90.9654	85.208	84.6621	89.3247	6.04597	167.67	155.832	158.631	161.363	12.7115	171.38	184.158	187.895	174.898	24.5931	335.496	328.039	336.102	329.176	45.7628	2849.96	2694.65	2647.28	2775.83	96.2796	9322.2	9394.78	9914.21	9093.64	102.568	7694	7114.65	14274.7	15159.5	188.923	46327	27387.5
12.1468	33820.8	18447.3	91705.6	38.6058	59864.2	34701.9	189670	2.6561	4034.12	3155.12	11177.2	2.73994	57.7584	53.9578	56.2203	54.3868	8.14145	221.809	229.348	229.729	222.554	14.2307	202.606	194.482	192.064	200.212	21.5145	303.541	308.108	289.702	303.358	48.2892	2995.88	2902.87	3011.62	2991.62	82.6255	7946.6	8355.25	8373.07	7824.41	102.311	7248.86	7365.83	14314.3	14409.1	180.944	45642.5	25684.6
17.9417	50293.4	26805.9	140582	10.6645	16739.1	9957.62	53784.9	2.37872	3884.71	2814.39	10395.1	2.46497	48.9922	48.9145	48.0629	48.0111	9.63891	263.847	265.787	246.72	269.224	19.9445	284.352	275.577	269.713	278.255	28.073	403.488	371.653	377.022	400.131	45.649	2641.11	2647.7	2685.87	2659.49	78.6902	7501.5	7417.39	7529.07	8045.34	148.042	10774.1	10164.3	22409	21917.3	189.209	45110.6	28577.6
18.2534	51231	27328.2	130852	29.3058	44631	27948	139451	2.0707	3135.78	2513.74	8402.11	4.76375	96.3433	99.1403	95.6648	99.6486	5.93093	154.589	162.222	153.489	155.578	15.9733	229.065	222.784	219.709	228.364	25.5458	336.777	364.058	343.194	352.007	53.3196	3045.21	3173.33	3147.79	3151.02	91.9251	8999.46	9361.17	9036.65	9104.29	100.577	7546.52	7129.83	14702.7	14589.4	161.817	39796	22554.6
17.7183	48322.7	26105.4	133948	39.033	63852.1	38067.7	195268	2.24609	3734.34	2730.17	9545.29	1.76899	35.9951	38.0335	35.0532	37.3622	8.62379	236.046	231.199	223.324	241.995	16.0921	233.042	216.847	230.275	231.031	25.3583	353.028	360.056	345.407	351.085	48.4525	2979.8	2795.35	2965.7	2771.25	87.7418	8478.87	8790.79	8319.91	8867.5	127.002	9684.69	8883.68	19104.6	18231.1	152.545	36112.8	22621.5
13.4791	36398	20734.6	104860	18.4449	28228.7	16844.3	86984.7	2.69865	4268.56	3294	11929	4.31381	86.5699	90.9923	88.556	89.488	6.33372	169.357	169.271	178.235	169.115	16.0072	232.171	219.461	233.727	226.794	26.5913	383.889	374.301	369.083	349.107	43.2952	2532.91	2633.87	2467.97	2656.82	64.1702	6271.03	6552.24	6383.39	6570.74	106.71	8028.99	7675.91	15543.6	15174.3	150.365	38008.2	23013
19.5657	53331	28644.5	142324	24.9747	41820.1	23367.8	122724	2.82358	4455.83	3467.79	12041.3	2.1429	44.1446	44.2096	43.0456	42.2154	7.45802	193.211	200.685	195.707	202.059	19.1939	264.035	280.28	275.959	281.938	22.6806	304.203	311.974	313.73	326.559	42.0307	2574.53	2611.22	2493.5	2566.81	94.6568	8910.8	9140.16	9109.99	9542.5	130.187	9843.3	8940.92	18194.3	19956.6	172.835	41294.1	24934.1
15.5609	42268.7	21790.5	117712	9.21878	15301.4	8917.06	46897.4	2.44848	3751.88	2893.88	10498.2	1.74422	37.4011	34.5938	35.1598	36.4994	8.90166	235.175	241.72	234.278	229.54	12.9999	185.615	180.435	179.104	178.762	22.2386	313.862	314.893	291.199	318.362	55.641	3444.86	3423.4	3195.53	3365.61	94.19	9398.7	9607.74	9441.09	9397.26	106.494	7412.61	7154.54	15666.3	15573	196.302	47753.6	27765.6
19.096	52808.7	28190.9	148650	14.3401	22029.4	13625.4	70679.2	2.91642	4541.5	3341.56	11768.3	3.62916	72.7114	70.7969	76.8274	73.8344	6.56124	172.121	171.187	173.838	173.388	10.2277	144.352	143.084	141.499	147.681	21.6737	301.148	290.319	299.526	294.084	36.8142	2194.72	2211.38	2287.12	2254.31	62.876	6231.09	6435.25	5966.59	6139.98	148.306	11109.3	10439.1	21504.2	21407.6	157.518	40325.3	23733.2
10.2887	29418.2	14928.9	75845.5	16.5531	27627.6	14940.3	81476.7	2.63134	4012.28	3093.97	10699.7	2.95822	61.3261	60.638	61.8477	62.7289	5.1017	134.21	134.306	133.175	143.881	17.9155	252.263	261.593	259.657	253.053	29.867	392.147	411.991	425.949	416.57	33.4425	1910.27	1929.94	1952.19	2012.12	79.3567	7927.29	7518.99	7841.61	7464.77	112.547	8387.96	7977.75	16066.2	16348.4	156.006	37915.3	23182.1
9.14439	26326.7	12783.8	67458.6	33.8723	52854.2	32724.6	167759	2.69097	4402.88	3184.35	11177.7	3.66318	75.8259	74.9253	76.6925	75.3476	5.71684	154.407	158.564	147.956	151.719	19.0815	266.54	267.517	270.044	271.252	20.2086	266.779	289.433	280.217	287.941	49.3581	3032.12	3005.78	2948.88	2947.72	74.7526	7327.01	7590.26	7398.3	7425.89	135.57	10307.5	9178.32	19075.2	20471.3	185.351	45580.2	26240.9
9.35871	26866.2	13878.6	73758.5	24.1433	38780.2	22152.4	116006	2.60407	4043.2	3125.4	11490.7	1.77161	37.5807	38.0399	36.9403	35.8934	5.44415	148.788	140.09	144.023	144.848	14.6179	200.828	208.604	206.358	212.677	21.9412	304.322	311.59	288.756	291.132	39.1817	2382.14	2433.57	2259.79	2302.39	71.5448	6756.06	6717.72	6895.83	6871.65	127.249	9002.21	9149.74	19291	17791.3	173.516	42103.8	25155.1
7.22732	19685.8	10570	53716.5	35.1166	58518.3	33060	167675	2.77944	4477.13	3210.25	11593	4.77282	95.9244	99.4491	93.3371	94.5671	8.39448	220.371	224.992	235.347	222.762	18.5208	248.992	271.84	260.481	258.644	28.2228	370.635	403.168	390.977	370.294	52.5654	3111.29	3002.74	3077.11	3251.79	99.0949	9733.7	9326.8	9892.91	9390.07	128.429	9141.82	8994.12	18878.8	18665.1	156.588	38042.3	22872.7
19.892	53655.4	28134.3	148243	14.3817	22431.8	13637.4	73412.4	2.57814	4249.12	3176.97	11212.2	1.04477	21.2105	21.9472	21.4974	21.2894	8.36548	230.278	225.592	236.136	222.256	16.7102	240.728	225.602	227.322	237.54	21.8323	298.141	303.982	304.634	299.429	45.9245	2874.36	2732.24	2853.21	2701.01	95.5325	9852.1	9533.3	9399.22	9331.14	141.951	9871.87	9622.97	20078.6	20152.9	158.571	37746.8	23272.8
18.6069	50858.9	26205.2	140079	38.1773	62435	36162.4	191569	2.2234	3407.24	2595.57	9747.16	3.64839	76.0565	72.5038	76.4538	78.4517	7.64493	205.104	209.427	214.598	204.86	18.4469	266.194	268.489	253.668	250.938	29.0065	397.357	409.21	393.534	383.897	42.1507	2437.54	2577.09	2437.82	2472.81	80.3209	8158.16	8215.46	8096.56	8233.96	102.957	7461.85	7186.73	14810.4	15131.1	181.559	47218.4	27643.6
15.5713	44379	22505.1	120663	27.4664	44954.8	25531.1	139383	2.94281	4486.66	3327.45	12511.8	3.5542	76.2219	76.0677	72.9919	70.6075	6.7242	179.102	180.4	176.981	174.238	11.0488	150.974	161.704	156.217	156.812	28.7205	378.982	386.541	397.937	400.545	33.1859	1923.1	2071.58	2078.8	1917.74	76.1489	7803.08	7789.82	7176.18	7838.93	128.858	9793.98	8710.82	19534.7	18898.6	178.63	44804.8	26556.5
14.0597	38956.8	20813.1	104760	19.7332	31166.4	19204.7	96425	2.07771	3238.34	2483.77	8728.44	1.76466	35.4603	36.8691	37.4682	37.7225	8.87836	229.564	235.152	249.087	237.646	17.1368	245.94	249.552	252.797	231.223	25.9378	368.744	358.93	354.546	373.827	52.9518	3026.08	3175.41	3083.75	3140.99	93.7771	9245.63	8835.47	8878.66	9051.29	112.344	7776.31	7607.46	16977.2	16739.2	197.02	49743	27600.7
15.7915	44367.6	23846.6	120850	37.341	57821.2	34392.4	177178	2.36265	3747.41	2653.85	10005.8	1.91649	41.0529	38.177	39.0773	41.1421	9.03922	238.369	250.926	254.001	233.397	14.5348	213.425	206.892	200.05	197.696	28.1352	403.118	401.102	370.962	381.335	40.9221	2513.45	2555.37	2383.14	2475.77	64.774	6392.99	6350.58	6622.56	6564.33	107.05	7897.43	7253.75	15103.9	16348.7	168.463	42495.2	24493.9
15.4205	42109.7	23307.7	119166	29.1948	47085.6	28126.5	145945	2.36579	3680.17	2821.34	9695.19	2.73959	58.4767	53.9925	53.6829	54.2135	5.30536	141.684	137.859	145.694	139.301	18.7879	268.135	255.498	264.79	273.458	29.5737	396.478	397.585	401.763	415.145	56.5471	3292.99	3473.44	3400.53	3465.35	90.176	9203.57	8581.18	8907.93	8843.88	137.776	9727.15	9286.29	20087.1	19457.1	152.79	37801.7	22254.6
16.1519	46471.1	24214.3	118161	27.0195	44284.6	25651.4	137395	2.25604	3593.94	2776.26	9989.61	4.74339	94.0726	101.628	92.6195	92.7615	8.24526	219.693	218.401	217.907	224.402	19.61	275.144	285.233	267.595	282.086	29.6417	413.028	394.008	405.767	390.601	39.3341	2254.42	2451.49	2376.22	2382.83	74.4061	7029.76	7310.28	7190.4	7564.91	128.453	9261.4	8569.92	19188.9	17852	175.275	41488.1	25908.5
16.8772	45592.2	25136.2	133141	31.7771	51552.1	29459	151142	2.68528	4201.32	3188.32	11784.9	3.24659	64.9392	64.2684	69.6178	63.5469	7.79359	212.13	204.836	204.965	202.93	13.1424	181.815	185.275	186.979	193.505	28.6946	399.994	385.292	380.472	387.399	46.7284	2711.19	2690.35	2916.77	2668.38	70.3542	6953.39	7169.2	6775.82	6913.07	129.821	9459.66	8896.33	18381.2	18542.9	153.027	37348.9	21577.8
[truncated: 9,000 more rows]
[truncated: 16 more columns]

## Sheet: Duration - Monte Carlo
SMA										JDA										VLA								Ensenada
[truncated: 10,001 more rows]

## Sheet: Data for graphs
SMA - Duration				SMA Volume				JDA - Duration				JDA volume				VLA - Duration				VLA volume				Ensendada volume				Ensendada duration
[truncated: 48 more rows]
